# Supplementary material for: Comparative Analysis of Transcriptomics and Metabolomics Reveals Defense Mechanisms in Melon Cultivars against Pseudoperonospora cubensis Infection
Source: Int J Mol Sci. 2023 Dec 16;24(24):17552. doi: 10.3390/ijms242417552 (PMC10743968; doi:10.3390/ijms242417552)
Supplement: Supplementary file 1 [file ijms-24-17552-s001.zip › Supplemental Table.xlsx]

## Sheet: Table S1
Supplemental Table S1. Information of primers used in this study for qPCR
Nr.	Gene ID	Predicted functions	Forward Primer	Reverse Primer
1	MELO3C014224.2	phenylalanine ammonia-lyase-like	TGGCACTGCTGTAGGTTCTG	CTGACCAGGGTGATGCTTCA
2	MELO3C019585.2	Cytochrome P450 family cinnamate 4-hydroxylase	AAGACTCTCCTCGGCCTCTT	GACTTGGAGCCAGTTTCCGA
3	MELO3C024886.2	4-coumarate:CoA ligase	GACCGTCGATTCTCCTCACG	TCACTCCCTTTGGCAATCCC
4	MELO3C023465.2	Cinnamoyl-CoA reductase	GGGGAGCGGTTGAGTTTGTA	CTCCGGATCGTCAGTCACAG
5	MELO3C027219.2	Hydroxycinnamoyl-CoA shikimate/quinate hydroxycinnamoyltransferase	GCCTTGACTCGGATGGACAA	GACCCAGCTTGTGATTCCCA
6	MELO3C009741.2	Cytochrome P450, putative	CTTCAGATGCTACGCGGACT	GTGCTCCTTCAGAACCTCCC
7	MELO3C012939.2	Caffeoylshikimate esterase	GGATCTCAAAGGCACCGTCT	GAAGAAGGAGAGGGATGCGG
8	MELO3C005992.2	homeobox-leucine zipper protein ATHB-7	TCCAGTGGCGTAAAGGAAGC	CACGACCAGAAGTTCCACCA
9	MELO3C026507.2	CLAVATA3/ESR (CLE)-related 25-like protein	GTTGGCTAATGGTTCGTGTCA	ACCACCACCGTCGTCTTTTT
10	MELO3C032454.2	PHD finger protein ALFIN-LIKE 3-like isoform X1	CTCCCTGCTCATCGAACTGG	TGCAGAAACGTCCGTGATCA
11	MELO3C013562.2	Flavin-containing monooxygenase	GATGTTCCGGTCGAGGTGTT	TTGAAAGCTTCGGGACCTCC
12	MELO3C026311.2	receptor-like protein kinase FERONIA	ACACTCCGCAGACAAGAAGG	CACGTCGTTCATTGATGGCC
13	MELO3C027119.2	1-aminocyclopropane-1-carboxylate oxidase 2	GGCACAGCTATCACCGTTCT	TCACCGCCCGATGAATAAGG
14	MELO3C027120.2	1-aminocyclopropane-1-carboxylate oxidase 2	GGCACGGTTCAAGATGTAGC	CAGGAGCTGCCATTAACGGA

## Sheet: Table S2
Supplemental Table S2. Mapping rates of RNA-seq samples. CK, control; DM, the treatment group inoculated with P. cubensis. The number following the treatment stands for the biological replicates.
Sample	Total Reads	Mapping rate	Q20(%)	Q30(%)	GC Content(%)
K10-1-CK-1	85341208	0.95	95.99	89.54	45.33
K10-1-CK-2	51732514	0.9569	96.81	91.33	45.43
K10-1-CK-3	54056284	0.9537	96.8	91.34	45.65
K10-1-DM-1	56551210	0.9484	96.09	89.77	44.77
K10-1-DM-2	45437416	0.957	96.95	91.58	44.79
K10-1-DM-3	158146390	0.9559	96.45	90.62	44.71
K10-9-CK-1	72556958	0.9558	96.13	89.79	45.57
K10-9-CK-2	75655940	0.9599	96.85	91.4	45.25
K10-9-CK-3	49136130	0.956	96.81	91.34	45.26
K10-9-DM-1	53268900	0.9639	97.37	92.44	44.51
K10-9-DM-2	103723284	0.9618	96.54	90.85	44.8
K10-9-DM-3	53762542	0.9585	96.86	91.4	44.31

## Sheet: Table S3 
Supplemental Table S3. Information of the 293 DEGs whose expression level in ‘K10-1’ was always higher than that in ‘K10-9’ in the control and treatment.
Nr.	ID	K10-1-CK-1_fpkm	K10-1-CK-2_fpkm	K10-1-CK-3_fpkm	K10-1-DM-1_fpkm	K10-1-DM-2_fpkm	K10-1-DM-3_fpkm	K10-9-CK-1_fpkm	K10-9-CK-2_fpkm	K10-9-CK-3_fpkm	K10-9-DM-1_fpkm	K10-9-DM-2_fpkm	K10-9-DM-3_fpkm	chr	start	end	strand	KEGG	KEGG pathway	NR	Swissprot	Tremble	KOG	GO	Pfam
1	MELO3C000200.2	136.809	138.046	148.646	47.3854	69.8064	41.5255	22.1812	42.7603	55.8404	2.4659	9.3095	3.3646	chr00	10680046	10682566	+	K15382 solute carrier family 50 (sugar transporter) | (RefSeq) bidirectional sugar transporter SWEET17-like (A)	--	bidirectional sugar transporter SWEET17 [Cucumis melo]	SWT17_ARATH RecName: Full=Bidirectional sugar transporter SWEET17 {ECO:0000303|PubMed:21107422}; Short=AtSWEET17 {ECO:0000303|PubMed:21107422}; AltName: Full=Protein SUGARS WILL EVENTUALLY BE EXPORTED TRANSPORTERS 17 {ECO:0000303|PubMed:21107422};	A0A1S3CSK8_CUCME SubName: Full=bidirectional sugar transporter SWEET17-like {ECO:0000313|RefSeq:XP_008467026.1};	Multitransmembrane protein	GO:0016021,integral component of membrane; GO:0009705,plant-type vacuole membrane; GO:0005353,fructose transmembrane transporter activity; GO:0051119,sugar transmembrane transporter activity; GO:0008643,carbohydrate transport; GO:0070417,cellular response to cold; GO:0006995,cellular response to nitrogen starvation; GO:0007623,circadian rhythm; GO:1902334,fructose export from vacuole to cytoplasm…	PF03083.19:Sugar efflux transporter for intercellular exchange
2	MELO3C000213.2	34.0857	31.2991	33.4163	31.8624	30.0951	37.1286	3.9217	4.0321	4.2635	6.5467	8.9973	8.4277	chr00	10851741	10852890	-	--	--	rab proteins geranylgeranyltransferase component A 2 [Cucumis melo var. makuwa]	REP_ARATH RecName: Full=Rab escort protein 1 {ECO:0000305}; Short=AthREP {ECO:0000303|PubMed:15854662};	A0A5A7UEH7_CUCME RecName: Full=Rab escort protein 1 {ECO:0000256|PIRNR:PIRNR016550};	GDP dissociation inhibitor	GO:0005737,cytoplasm; GO:0005829,cytosol; GO:0005634,nucleus; GO:0005968,Rab-protein geranylgeranyltransferase complex; GO:0005092,GDP-dissociation inhibitor activity; GO:0005096,GTPase activator activity; GO:0004663,Rab geranylgeranyltransferase activity; GO:0031267,small GTPase binding; GO:0006886,intracellular protein transport; GO:0009555,pollen development; GO:0009846,pollen germination; GO:…	--
3	MELO3C000321.2	3.0972	2.9243	3.1135	6.1379	5.8861	6.4412	0	0	0.0669	0.0611	0.1255	0	chr00	1362174	1362842	+	--	--	putative disease resistance protein RGA3 [Cucumis melo]	RGA3_SOLBU RecName: Full=Putative disease resistance protein RGA3; AltName: Full=Blight resistance protein B149; AltName: Full=RGA1-blb;	A0A5D3CEX2_CUCME SubName: Full=Putative disease resistance RPP13-like protein 1 isoform X1 {ECO:0000313|EMBL:TYK10413.1};	Apoptotic ATPase	GO:0043531,ADP binding; GO:0005524,ATP binding; GO:0050832,defense response to fungus; GO:0000166,nucleotide binding; GO:0003674,molecular_function; GO:0005488,binding; GO:0017076,purine nucleotide binding; GO:0030554,adenyl nucleotide binding; GO:0032553,ribonucleotide binding; GO:0032555,purine ribonucleotide binding; GO:0032559,adenyl ribonucleotide binding; GO:0036094,small molecule binding; …	PF18052.4:Rx N-terminal domain
4	MELO3C000333.2	18.9274	13.8559	12.9364	25.9422	23.4277	29.9059	4.5774	4.5438	2.7346	4.7161	7.742	5.9645	chr00	12553822	12554809	+	K00889 1-phosphatidylinositol-4-phosphate 5-kinase [EC:2.7.1.68] | (RefSeq) phosphatidylinositol 4-phosphate 5-kinase 6-like (A)	ko00562: Inositol phosphate metabolism; ko01100: Metabolic pathways; ko04070: Phosphatidylinositol signaling system; ko04144: Endocytosis	phosphatidylinositol 4-phosphate 5-kinase 6 [Cucumis melo var. makuwa]	PI5K6_ARATH RecName: Full=Phosphatidylinositol 4-phosphate 5-kinase 6; Short=AtPIP5K6; EC=2.7.1.68; AltName: Full=1-phosphatidylinositol 4-phosphate kinase 6; AltName: Full=Diphosphoinositide kinase 6; AltName: Full=PtdIns(4)P-5-kinase 6;	A0A5A7SWQ5_CUCME RecName: Full=1-phosphatidylinositol-4-phosphate 5-kinase {ECO:0000256|ARBA:ARBA00012172}; EC=2.7.1.68 {ECO:0000256|ARBA:ARBA00012172};	Phosphatidylinositol-4-phosphate 5-kinase	GO:0016324,apical plasma membrane; GO:0005886,plasma membrane; GO:0090406,pollen tube; GO:0016308,1-phosphatidylinositol-4-phosphate 5-kinase activity; GO:0005524,ATP binding; GO:0072583,clathrin-dependent endocytosis; GO:0046854,phosphatidylinositol phosphorylation; GO:0016310,phosphorylation; GO:0003674,molecular_function; GO:0003824,catalytic activity; GO:0016301,kinase activity; GO:0016307,ph…	PF01504.21:Phosphatidylinositol-4-phosphate 5-Kinase
5	MELO3C000606.2	61.9214	53.5145	47.8746	42.3296	57.308	64.8743	16.7985	10.7946	13.6376	9.7445	11.6787	14.7729	chr00	18791946	18792096	-	K05761 villin 1 | (RefSeq) villin-1 (A)	--	villin-5-like isoform X1 [Cucumis melo]	VILI5_ARATH RecName: Full=Villin-5 {ECO:0000303|PubMed:20807879};	A0A5A7ST58_CUCME SubName: Full=Villin-4-like isoform X4 {ECO:0000313|EMBL:KAA0032537.1};	Actin regulatory proteins (gelsolin/villin family)	GO:0005737,cytoplasm; GO:0005856,cytoskeleton; GO:0051015,actin filament binding; GO:0051693,actin filament capping; GO:0007015,actin filament organization; GO:0051014,actin filament severing; GO:0003674,molecular_function; GO:0003779,actin binding; GO:0005488,binding; GO:0005515,protein binding; GO:0008092,cytoskeletal protein binding; GO:0044877,protein-containing complex binding; GO:0006996,or…	--
6	MELO3C000668.2	59.7494	44.1728	51.2719	6.5672	3.4427	1.7245	32.7246	16.6146	12.1043	1.7542	1.3515	0.6092	chr00	16964559	16965024	+	K03327 multidrug resistance protein, MATE family | (RefSeq) protein DETOXIFICATION 40-like (A)	--	protein TRANSPARENT TESTA 12 [Cucumis melo var. makuwa]	DTX40_ARATH RecName: Full=Protein DETOXIFICATION 40 {ECO:0000303|PubMed:11739388}; Short=AtDTX40 {ECO:0000303|PubMed:11739388}; AltName: Full=Multidrug and toxic compound extrusion protein 40 {ECO:0000305}; Short=MATE protein 40 {ECO:0000305};	A0A5D3C766_CUCME SubName: Full=Protein TRANSPARENT TESTA 12 {ECO:0000313|EMBL:TYK07104.1};	Uncharacterized membrane protein, predicted efflux pump	GO:0016021,integral component of membrane; GO:0016020,membrane; GO:0000325,plant-type vacuole; GO:0005774,vacuolar membrane; GO:0005773,vacuole; GO:0015297,antiporter activity; GO:0022857,transmembrane transporter activity; GO:0042910,xenobiotic transmembrane transporter activity; GO:1990961,xenobiotic detoxification by transmembrane export across the plasma membrane; GO:0003674,molecular_functio…	PF01554.21:MatE
7	MELO3C000830.2	13.8226	9.9163	11.639	15.4551	13.6022	20.2452	0.3129	0.3016	0.9278	0.2118	0.2176	0	chr00	19279916	19280108	-	--	--	UPF0261 protein y4oU [Cucumis melo var. makuwa]	TM1S_SOLLC RecName: Full=ToMV susceptible protein tm-1(GCR26) {ECO:0000303|PubMed:17699618}; AltName: Full=Disease susceptible protein tm-1 {ECO:0000305}; AltName: Full=Protein p80(GCR26) {ECO:0000303|PubMed:17699618};	A0A5A7SZ39_CUCME SubName: Full=UPF0261 protein y4oU {ECO:0000313|EMBL:KAA0035186.1};	--	GO:0005524,ATP binding; GO:0003824,catalytic activity; GO:0051607,defense response to virus; GO:0044830,modulation by host of viral RNA genome replication; GO:0000166,nucleotide binding; GO:0003674,molecular_function; GO:0005488,binding; GO:0017076,purine nucleotide binding; GO:0030554,adenyl nucleotide binding; GO:0032553,ribonucleotide binding; GO:0032555,purine ribonucleotide binding; GO:00325…	PF06792.14:Uncharacterised protein family (UPF0261)
8	MELO3C000966.2	9.7016	9.646	8.9825	12.7795	15.3698	14.7128	0.2075	0.3001	0.1538	0.2809	0.3607	0.1394	chr00	21425468	21425936	-	--	--	uncharacterized protein LOC127149343 [Cucumis melo]	--	A0A5A7TML7_CUCME SubName: Full=Glycosylphosphatidylinositol anchor biosynthesis protein 11 {ECO:0000313|EMBL:KAA0044450.1};	--	GO:0016021,integral component of membrane; GO:0005575,cellular_component; GO:0016020,membrane; GO:0031224,intrinsic component of membrane; GO:0110165,cellular anatomical entity	--
9	MELO3C001078.2	29.3072	31.4313	36.0673	40.1128	46.5853	40.5838	8.5107	9.9048	11.8693	11.8607	11.9213	24.1318	chr00	22842277	22844259	+	--	--	uncharacterized protein LOC103504252 [Cucumis melo]	--	A0A1S3CS97_CUCME SubName: Full=uncharacterized protein LOC103504252 {ECO:0000313|RefSeq:XP_008466904.1};	FOG: PPR repeat	--	PF07939.14:Protein of unknown function (DUF1685)
10	MELO3C001238.2	4.5199	5.9208	5.1253	5.6968	9.0558	6.3845	3.4342	1.4839	1.0533	0.9617	2.9227	1.5905	chr00	25270329	25272300	+	K23260 scopoletin glucosyltransferase [EC:2.4.1.128] | (RefSeq) scopoletin glucosyltransferase-like (A)	ko00999: Biosynthesis of various plant secondary metabolites; ko01110: Biosynthesis of secondary metabolites	anthocyanidin 3-O-glucosyltransferase 2-like [Cucumis melo]	UFOG2_MANES RecName: Full=Anthocyanidin 3-O-glucosyltransferase 2; EC=2.4.1.115; AltName: Full=Flavonol 3-O-glucosyltransferase 2; AltName: Full=UDP-glucose flavonoid 3-O-glucosyltransferase 2; Flags: Fragment;	A0A1S4E606_CUCME SubName: Full=anthocyanidin 3-O-glucosyltransferase 2-like {ECO:0000313|RefSeq:XP_016903663.1};	UDP-glucuronosyl and UDP-glucosyl transferase	GO:0047213,anthocyanidin 3-O-glucosyltransferase activity; GO:0009718,anthocyanin-containing compound biosynthetic process; GO:0003674,molecular_function; GO:0003824,catalytic activity; GO:0008194,UDP-glycosyltransferase activity; GO:0016740,transferase activity; GO:0016757,transferase activity, transferring glycosyl groups; GO:0016758,transferase activity, transferring hexosyl groups; GO:0035251…	PF00201.21:UDP-glucoronosyl and UDP-glucosyl transferase
11	MELO3C001253.2	21.4569	18.3463	17.418	29.0535	30.027	38.1033	0	0.1427	0	0	0	0	chr00	13071349	13071552	-	K24917 amino acid permease | (RefSeq) amino acid permease 3-like (A)	--	villin-4-like isoform X4 [Cucumis melo var. makuwa]	AAP6_ARATH RecName: Full=Amino acid permease 6; AltName: Full=Amino acid transporter AAP6;	A0A5A7ST58_CUCME SubName: Full=Villin-4-like isoform X4 {ECO:0000313|EMBL:KAA0032537.1};	Amino acid transporters	GO:0016021,integral component of membrane; GO:0016020,membrane; GO:0005886,plasma membrane; GO:0015172,acidic amino acid transmembrane transporter activity; GO:0015171,amino acid transmembrane transporter activity; GO:0015175,neutral amino acid transmembrane transporter activity; GO:0015293,symporter activity; GO:0015800,acidic amino acid transport; GO:0003333,amino acid transmembrane transport; …	PF01490.21:Transmembrane amino acid transporter protein
12	MELO3C002170.2	241.476	219.427	251.865	312.558	294.406	267.077	52.1877	41.0053	37.6001	66.0719	72.4856	43.5482	chr12	25850788	25855886	-	K00002 alcohol dehydrogenase (NADP+) [EC:1.1.1.2] | (RefSeq) aldo-keto reductase family 4 member C9-like (A)	ko00010: Glycolysis / Gluconeogenesis; ko00040: Pentose and glucuronate interconversions; ko00053: Ascorbate and aldarate metabolism; ko00561: Glycerolipid metabolism; ko00620: Pyruvate metabolism; ko01100: Metabolic pathways; ko01110: Biosynthesis of secondary metabolites; ko01240: Biosynthesis of cofactors	NADPH-dependent aldo-keto reductase, chloroplastic-like [Cucumis melo]	AKRC9_ARATH RecName: Full=NADPH-dependent aldo-keto reductase, chloroplastic {ECO:0000303|PubMed:21169366}; Short=AtChlAKR {ECO:0000303|PubMed:21169366}; EC=1.1.1.- {ECO:0000269|PubMed:19616008, ECO:0000269|PubMed:21169366}; AltName: Full=Aldo-keto reductase family 4 member C9;	A0A1S3ATE7_CUCME SubName: Full=aldo-keto reductase family 4 member C9-like {ECO:0000313|RefSeq:XP_008436964.1};	Aldo/keto reductase family proteins	GO:0009507,chloroplast; GO:0005829,cytosol; GO:0005783,endoplasmic reticulum; GO:0008106,alcohol dehydrogenase (NADP+) activity; GO:0004032,alditol:NADP+ 1-oxidoreductase activity; GO:0004033,aldo-keto reductase (NADP) activity; GO:0070401,NADP+ binding; GO:0016229,steroid dehydrogenase activity; GO:0009409,response to cold; GO:0009651,response to salt stress; GO:0009636,response to toxic substan…	PF00248.24:Aldo/keto reductase family
13	MELO3C002398.2	1.4477	1.9882	1.0999	0.6299	0.5929	0.7463	0.2455	0.5177	0.2502	0.1869	0.3414	0.3297	chr12	24328891	24330858	+	K03294 basic amino acid/polyamine antiporter, APA family | (RefSeq) cationic amino acid transporter 1-like (A)	--	cationic amino acid transporter 5 [Cucumis melo]	CAAT5_ARATH RecName: Full=Cationic amino acid transporter 5;	A0A1S3B1F8_CUCME SubName: Full=cationic amino acid transporter 5 {ECO:0000313|RefSeq:XP_008440316.1};	Amino acid transporters	GO:0016021,integral component of membrane; GO:0005886,plasma membrane; GO:0015171,amino acid transmembrane transporter activity; GO:0005313,L-glutamate transmembrane transporter activity; GO:0015189,L-lysine transmembrane transporter activity; GO:0006865,amino acid transport; GO:0003674,molecular_function; GO:0005215,transporter activity; GO:0005342,organic acid transmembrane transporter activity…	PF13520.9:Amino acid permease
14	MELO3C002414.2	5.2041	3.7396	4.048	17.1505	16.1613	17.6176	0.6172	1.0776	1.1222	5.0913	5.6674	3.6288	chr12	24175284	24179867	+	--	--	ankyrin repeat-containing protein At5g02620-like isoform X2 [Cucumis melo]	ITN1_ARATH RecName: Full=Ankyrin repeat-containing protein ITN1; AltName: Full=Protein INCREASED TOLERANCE TO NACL {ECO:0000303|PubMed:18643991};	A0A1S3B217_CUCME SubName: Full=ankyrin repeat-containing protein At5g02620-like isoform X1 {ECO:0000313|RefSeq:XP_008440571.1};	FOG: Ankyrin repeat	GO:0016021,integral component of membrane; GO:0016020,membrane; GO:0005634,nucleus; GO:0005886,plasma membrane; GO:0009651,response to salt stress; GO:0006950,response to stress; GO:0006970,response to osmotic stress; GO:0008150,biological_process; GO:0009628,response to abiotic stimulus; GO:0050896,response to stimulus; GO:0005575,cellular_component; GO:0031224,intrinsic component of membrane; G…	PF13962.9:Domain of unknown function
15	MELO3C002501.2	1.2587	1.461	0.8042	4.2844	4.9695	4.0981	0	0.0244	0	1.6438	0.5101	1.5462	chr12	23633920	23636908	+	K13418 somatic embryogenesis receptor kinase 1 [EC:2.7.10.1 2.7.11.1] | (RefSeq) somatic embryogenesis receptor kinase 2 (A)	--	cysteine-rich receptor-like protein kinase 26 isoform X1 [Cucumis melo var. makuwa]	CRK26_ARATH RecName: Full=Cysteine-rich receptor-like protein kinase 26; Short=Cysteine-rich RLK26; EC=2.7.11.-; Flags: Precursor;	A0A5A7UTM7_CUCME SubName: Full=Cysteine-rich receptor-like protein kinase 26 isoform X1 {ECO:0000313|EMBL:KAA0056895.1};	--	GO:0016021,integral component of membrane; GO:0005886,plasma membrane; GO:0005524,ATP binding; GO:0106310,protein serine kinase activity; GO:0004674,protein serine/threonine kinase activity; GO:0006468,protein phosphorylation; GO:0000166,nucleotide binding; GO:0003674,molecular_function; GO:0005488,binding; GO:0017076,purine nucleotide binding; GO:0030554,adenyl nucleotide binding; GO:0032553,rib…	PF07714.20:Protein tyrosine and serine/threonine kinase
16	MELO3C002608.2	156.493	175.001	183.79	64.6661	116.069	76.553	7.2062	7.409	5.7485	6.9669	5.0099	7.4664	chr12	22771063	22772067	+	--	--	transcription factor bHLH162-like [Cucumis melo]	BH162_ARATH RecName: Full=Transcription factor bHLH162; AltName: Full=Basic helix-loop-helix protein 162; Short=AtbHLH162 {ECO:0000303|PubMed:14600211}; Short=bHLH 162; AltName: Full=bHLH transcription factor bHLH162;	A0A1S3B660_CUCME SubName: Full=transcription factor bHLH118-like {ECO:0000313|RefSeq:XP_008442634.2};	--	GO:0090575,RNA polymerase II transcription regulator complex; GO:0003700,DNA-binding transcription factor activity; GO:0000981,DNA-binding transcription factor activity, RNA polymerase II-specific; GO:0046983,protein dimerization activity; GO:0000977,RNA polymerase II transcription regulatory region sequence-specific DNA binding; GO:0050832,defense response to fungus; GO:0006357,regulation of tra…	PF00010.29:Helix-loop-helix DNA-binding domain
17	MELO3C002763.2	32.0564	12.7145	31.0132	81.5872	53.702	68.0361	14.5796	3.7417	7.3608	30.181	15.0628	9.5788	chr12	21124372	21125040	-	--	--	hypothetical protein E6C27_scaffold318G00710 [Cucumis melo var. makuwa]	--	A0A5A7UJX7_CUCME SubName: Full=Uncharacterized protein {ECO:0000313|EMBL:KAA0054015.1};	--	--	--
18	MELO3C002765.2	5.8436	5.0352	5.7781	6.1439	6.5158	7.0465	0	0	0	0	0	0	chr12	21080151	21085789	+	--	--	uncharacterized protein LOC103487886 [Cucumis melo]	--	A0A1S3BAQ2_CUCME SubName: Full=uncharacterized protein LOC103487886 {ECO:0000313|RefSeq:XP_008444620.1};	--	--	--
19	MELO3C002839.2	0.9998	1.0424	0.7758	1.353	1.6682	3.6252	0.3701	0.2319	0.3017	0.576	0.7976	0.7704	chr12	19849853	19851484	+	K22395 cinnamyl-alcohol dehydrogenase [EC:1.1.1.195] | (RefSeq) flavin-dependent oxidoreductase FOX5-like (A)	ko00940: Phenylpropanoid biosynthesis; ko01100: Metabolic pathways; ko01110: Biosynthesis of secondary metabolites	berberine bridge enzyme-like 13 [Cucumis melo]	BBE13_ARATH RecName: Full=Berberine bridge enzyme-like 13 {ECO:0000303|PubMed:26037923}; Short=AtBBE-like 13 {ECO:0000303|PubMed:26037923}; EC=1.1.1.194 {ECO:0000269|PubMed:26037923}; EC=1.1.1.195 {ECO:0000269|PubMed:26037923}; Flags: Precursor;	A0A5A7V956_CUCME SubName: Full=Flavin-dependent oxidoreductase FOX5-like {ECO:0000313|EMBL:KAA0063744.1};	--	GO:0005576,extracellular region; GO:0009505,plant-type cell wall; GO:0045551,cinnamyl-alcohol dehydrogenase activity; GO:0050268,coniferyl-alcohol dehydrogenase activity; GO:0071949,FAD binding; GO:0052747,sinapyl alcohol dehydrogenase activity; GO:0003674,molecular_function; GO:0003824,catalytic activity; GO:0016491,oxidoreductase activity; GO:0016614,oxidoreductase activity, acting on CH-OH gro…	PF01565.26:FAD binding domain
20	MELO3C002856.2	0.9575	0.9827	0.6983	1.6111	1.4603	1.4534	0	0	0	0	0	0	chr12	19427920	19438746	-	K22395 cinnamyl-alcohol dehydrogenase [EC:1.1.1.195] | (RefSeq) flavin-dependent oxidoreductase FOX2-like (A)	ko00940: Phenylpropanoid biosynthesis; ko01100: Metabolic pathways; ko01110: Biosynthesis of secondary metabolites	tetrahydroberberine oxidase-like [Cucumis melo]	STOX_BERWI RecName: Full=Tetrahydroberberine oxidase {ECO:0000303|PubMed:3402447}; Short=THB oxidase {ECO:0000305}; EC=1.3.3.8 {ECO:0000269|PubMed:21327819, ECO:0000269|PubMed:3402447}; AltName: Full=(S)-tetrahydroprotoberberine oxidase {ECO:0000303|PubMed:21327819}; Short=BwSTOX {ECO:0000303|PubMed:21327819}; Flags: Precursor;	A0A1S3BDG0_CUCME SubName: Full=cannabidiolic acid synthase-like {ECO:0000313|RefSeq:XP_008445743.1};	--	GO:0071949,FAD binding; GO:0050328,tetrahydroberberine oxidase activity; GO:0000166,nucleotide binding; GO:0003674,molecular_function; GO:0005488,binding; GO:0036094,small molecule binding; GO:0043167,ion binding; GO:0043168,anion binding; GO:0050660,flavin adenine dinucleotide binding; GO:0097159,organic cyclic compound binding; GO:1901265,nucleoside phosphate binding; GO:1901363,heterocyclic co…	PF01565.26:FAD binding domain
21	MELO3C002877.2	1.8816	1.3546	1.4725	2.1527	1.8582	2.2987	0	0	0	0	0	0	chr09	6828336	6845661	+	--	--	TMV resistance protein N-like [Cucumis melo]	TMVRN_NICGU RecName: Full=TMV resistance protein N; EC=3.2.2.6 {ECO:0000255|PROSITE-ProRule:PRU00204};	A0A1S3CPB4_CUCME SubName: Full=TMV resistance protein N-like {ECO:0000313|RefSeq:XP_008465659.2};	--	GO:0005737,cytoplasm; GO:0043531,ADP binding; GO:0005524,ATP binding; GO:0050135,NAD(P)+ nucleosidase activity; GO:0061809,NAD+ nucleotidase, cyclic ADP-ribose generating; GO:0050832,defense response to fungus; GO:0009626,plant-type hypersensitive response; GO:0007165,signal transduction; GO:0000166,nucleotide binding; GO:0003674,molecular_function; GO:0005488,binding; GO:0017076,purine nucleotid…	PF00931.25:NB-ARC domain
22	MELO3C003112.2	5.76	5.9034	8.9609	34.6329	25.7588	25.7262	3.9212	2.3025	2.4054	7.5645	8.6482	3.9348	chr08	32166252	32166921	+	--	--	uncharacterized protein E6C27_scaffold184G00030 [Cucumis melo var. makuwa]	--	A0A5A7STU5_CUCME SubName: Full=Uncharacterized protein {ECO:0000313|EMBL:KAA0032619.1};	--	GO:0016021,integral component of membrane; GO:0005575,cellular_component; GO:0016020,membrane; GO:0031224,intrinsic component of membrane; GO:0110165,cellular anatomical entity	--
23	MELO3C003157.2	12.3071	12.5162	7.5084	6.4611	7.604	5.2896	4.3427	2.5676	2.6548	1.2725	1.2917	0.3307	chr08	32658249	32660709	+	K00002 alcohol dehydrogenase (NADP+) [EC:1.1.1.2] | (RefSeq) aldo-keto reductase family 4 member C9-like (A)	ko00010: Glycolysis / Gluconeogenesis; ko00040: Pentose and glucuronate interconversions; ko00053: Ascorbate and aldarate metabolism; ko00561: Glycerolipid metabolism; ko00620: Pyruvate metabolism; ko01100: Metabolic pathways; ko01110: Biosynthesis of secondary metabolites; ko01240: Biosynthesis of cofactors	NADPH-dependent aldo-keto reductase, chloroplastic-like [Cucumis melo]	AKRC9_ARATH RecName: Full=NADPH-dependent aldo-keto reductase, chloroplastic {ECO:0000303|PubMed:21169366}; Short=AtChlAKR {ECO:0000303|PubMed:21169366}; EC=1.1.1.- {ECO:0000269|PubMed:19616008, ECO:0000269|PubMed:21169366}; AltName: Full=Aldo-keto reductase family 4 member C9;	A0A5D3DJ01_CUCME SubName: Full=Aldo-keto reductase family 4 member C9-like {ECO:0000313|EMBL:TYK23565.1};	Aldo/keto reductase family proteins	GO:0009507,chloroplast; GO:0005829,cytosol; GO:0005783,endoplasmic reticulum; GO:0008106,alcohol dehydrogenase (NADP+) activity; GO:0004032,alditol:NADP+ 1-oxidoreductase activity; GO:0004033,aldo-keto reductase (NADP) activity; GO:0070401,NADP+ binding; GO:0016229,steroid dehydrogenase activity; GO:0009409,response to cold; GO:0009651,response to salt stress; GO:0009636,response to toxic substan…	PF00248.24:Aldo/keto reductase family
24	MELO3C003164.2	7.6018	13.94	8.1469	8.6463	7.9032	6.7696	0.0796	0.1023	0.0787	1.1852	0.3874	2.0315	chr08	32711512	32715341	-	--	--	diacylglycerol kinase theta-like [Cucumis melo var. makuwa]	--	A0A5A7TQK1_CUCME SubName: Full=Diacylglycerol kinase theta-like {ECO:0000313|EMBL:KAA0045158.1};	--	GO:0016301,kinase activity; GO:0016310,phosphorylation; GO:0003674,molecular_function; GO:0003824,catalytic activity; GO:0016740,transferase activity; GO:0016772,transferase activity, transferring phosphorus-containing groups; GO:0006793,phosphorus metabolic process; GO:0006796,phosphate-containing compound metabolic process; GO:0008150,biological_process; GO:0008152,metabolic process; GO:0009987…	PF03107.19:C1 domain
25	MELO3C003202.2	15.0073	10.8466	10.5989	15.3392	22.2956	23.5579	0	0.0651	0	0	0	0	chr08	33137649	33138478	-	--	--	beta-galactosidase [Cucumis melo var. makuwa]	BGAL_MALDO RecName: Full=Beta-galactosidase; EC=3.2.1.23; AltName: Full=Acid beta-galactosidase; Short=Lactase; AltName: Full=Exo-(1-->4)-beta-D-galactanase; Flags: Precursor;	A0A5D3CFV7_CUCME RecName: Full=Beta-galactosidase {ECO:0000256|ARBA:ARBA00012756, ECO:0000256|RuleBase:RU000675}; EC=3.2.1.23 {ECO:0000256|ARBA:ARBA00012756, ECO:0000256|RuleBase:RU000675};	Beta-galactosidase	GO:0048046,apoplast; GO:0004565,beta-galactosidase activity; GO:0005975,carbohydrate metabolic process; GO:0003674,molecular_function; GO:0003824,catalytic activity; GO:0004553,hydrolase activity, hydrolyzing O-glycosyl compounds; GO:0015925,galactosidase activity; GO:0016787,hydrolase activity; GO:0016798,hydrolase activity, acting on glycosyl bonds; GO:0008150,biological_process; GO:0008152,met…	PF01301.22:Glycosyl hydrolases family 35
26	MELO3C003822.2	2.6112	2.8475	2.7186	9.9522	8.5157	8.8506	1.2342	0.7931	0.5228	3.9616	3.0236	1.6735	chr04	5051857	5054946	-	--	--	uncharacterized protein LOC103504031 [Cucumis melo]	JAL3_ARATH RecName: Full=Jacalin-related lectin 3; AltName: Full=Mannose-binding lectin superfamily protein;	A0A1S3CT35_CUCME SubName: Full=uncharacterized protein LOC103504031 {ECO:0000313|RefSeq:XP_008466678.2};	--	GO:0030246,carbohydrate binding; GO:0003674,molecular_function; GO:0005488,binding	PF03107.19:C1 domain
27	MELO3C003827.2	4.0308	3.9319	5.3491	6.6255	4.3447	3.9923	1.2098	0.6727	0.7588	1.1336	1.6821	0.1875	chr04	5177214	5177862	+	--	--	protein RADIALIS-like 4 [Cucumis melo]	RADL3_ARATH RecName: Full=Protein RADIALIS-like 3; Short=AtRL3; Short=Protein RAD-like 3;	A0A5A7TE80_CUCME SubName: Full=Protein RADIALIS-like 3 {ECO:0000313|EMBL:KAA0041600.1};	Zuotin and related molecular chaperones (DnaJ superfamily), contains DNA-binding domains	GO:0005634,nucleus; GO:0003700,DNA-binding transcription factor activity; GO:0003674,molecular_function; GO:0140110,transcription regulator activity; GO:0005575,cellular_component; GO:0005622,intracellular anatomical structure; GO:0043226,organelle; GO:0043227,membrane-bounded organelle; GO:0043229,intracellular organelle; GO:0043231,intracellular membrane-bounded organelle; GO:0110165,cellular a…	PF00249.34:Myb-like DNA-binding domain
28	MELO3C004110.2	90.7259	66.6572	79.981	55.757	68.453	157.883	35.8791	38.0734	40.4386	41.3763	15.1334	24.7964	chr05	24319690	24321898	+	K01611 S-adenosylmethionine decarboxylase [EC:4.1.1.50] | (RefSeq) S-adenosylmethionine decarboxylase proenzyme-like (A)	ko00270: Cysteine and methionine metabolism; ko00330: Arginine and proline metabolism; ko01100: Metabolic pathways	S-adenosylmethionine decarboxylase proenzyme-like [Cucumis melo var. makuwa]	DCAM_ORYSJ RecName: Full=S-adenosylmethionine decarboxylase proenzyme; Short=AdoMetDC; Short=SAMDC; EC=4.1.1.50; Contains: RecName: Full=S-adenosylmethionine decarboxylase alpha chain; Contains: RecName: Full=S-adenosylmethionine decarboxylase beta chain; Flags: Precursor;	A0A5A7TMS6_CUCME RecName: Full=S-adenosylmethionine decarboxylase proenzyme {ECO:0000256|PIRNR:PIRNR001355}; EC=4.1.1.50 {ECO:0000256|PIRNR:PIRNR001355};	S-adenosylmethionine decarboxylase	GO:0005829,cytosol; GO:0004014,adenosylmethionine decarboxylase activity; GO:0006557,S-adenosylmethioninamine biosynthetic process; GO:0008295,spermidine biosynthetic process; GO:0006597,spermine biosynthetic process; GO:0003674,molecular_function; GO:0003824,catalytic activity; GO:0016829,lyase activity; GO:0016830,carbon-carbon lyase activity; GO:0016831,carboxy-lyase activity; GO:0006139,nucle…	PF01536.19:Adenosylmethionine decarboxylase
29	MELO3C004259.2	0.889	1.3159	0.9576	8.2682	7.8381	11.384	0.0657	0.0704	0.2272	3.5962	3.9125	4.9313	chr05	25752437	25757292	+	--	--	TMV resistance protein N-like isoform X1 [Cucumis melo]	TMVRN_NICGU RecName: Full=TMV resistance protein N; EC=3.2.2.6 {ECO:0000255|PROSITE-ProRule:PRU00204};	A0A1S3BZQ4_CUCME SubName: Full=TMV resistance protein N-like isoform X1 {ECO:0000313|RefSeq:XP_008454579.1};	--	GO:0005737,cytoplasm; GO:0043531,ADP binding; GO:0005524,ATP binding; GO:0050135,NAD(P)+ nucleosidase activity; GO:0061809,NAD+ nucleotidase, cyclic ADP-ribose generating; GO:0050832,defense response to fungus; GO:0009626,plant-type hypersensitive response; GO:0007165,signal transduction; GO:0000166,nucleotide binding; GO:0003674,molecular_function; GO:0005488,binding; GO:0017076,purine nucleotid…	PF01582.23:TIR domain
30	MELO3C004313.2	16.067	18.0576	15.3134	22.5102	25.6523	23.8136	0.514	1.7203	2.2013	3.3046	2.0547	2.6464	chr05	26311869	26315091	-	--	--	LOW QUALITY PROTEIN: disease resistance protein RPV1-like [Cucumis melo]	TMVRN_NICGU RecName: Full=TMV resistance protein N; EC=3.2.2.6 {ECO:0000255|PROSITE-ProRule:PRU00204};	A0A1S4DZR7_CUCME SubName: Full=TMV resistance protein N-like {ECO:0000313|RefSeq:XP_016901487.1};	--	GO:0005737,cytoplasm; GO:0043531,ADP binding; GO:0005524,ATP binding; GO:0050135,NAD(P)+ nucleosidase activity; GO:0061809,NAD+ nucleotidase, cyclic ADP-ribose generating; GO:0050832,defense response to fungus; GO:0009626,plant-type hypersensitive response; GO:0007165,signal transduction; GO:0000166,nucleotide binding; GO:0003674,molecular_function; GO:0005488,binding; GO:0017076,purine nucleotid…	PF00931.25:NB-ARC domain
31	MELO3C004320.2	0.9748	1.2806	1.4426	1.8842	1.8298	1.5805	0.0525	0.118	0.0518	0.4023	0.2674	0.2818	chr05	26423627	26425625	+	--	--	probable disease resistance protein At5g63020 [Cucumis melo]	DRL28_ARATH RecName: Full=Probable disease resistance protein At4g27220;	A0A1S3CDM1_CUCME SubName: Full=probable disease resistance protein At4g27220 {ECO:0000313|RefSeq:XP_008460766.2};	Apoptotic ATPase	GO:0043531,ADP binding; GO:0005524,ATP binding; GO:0006952,defense response; GO:0000166,nucleotide binding; GO:0003674,molecular_function; GO:0005488,binding; GO:0017076,purine nucleotide binding; GO:0030554,adenyl nucleotide binding; GO:0032553,ribonucleotide binding; GO:0032555,purine ribonucleotide binding; GO:0032559,adenyl ribonucleotide binding; GO:0036094,small molecule binding; GO:0043167…	PF00931.25:NB-ARC domain
32	MELO3C004346.2	0.9962	0.8271	0.8296	1.4564	1.4917	1.6107	0.2349	0.327	0.1741	0.3886	0.4355	0.5083	chr05	26714026	26739311	+	K14798 protein LTV1 | (RefSeq) protein LTV1 homolog (A)	--	translation initiation factor eIF-2B subunit epsilon isoform X1 [Cucumis melo var. makuwa]	P23B_ARATH RecName: Full=Co-chaperone protein p23-2 {ECO:0000305}; AltName: Full=Atp23-2 {ECO:0000303|PubMed:20349287};	A0A5A7VDS3_CUCME RecName: Full=eIF-2B GDP-GTP exchange factor subunit epsilon {ECO:0000256|ARBA:ARBA00029699};	--	GO:0101031,chaperone complex; GO:0005737,cytoplasm; GO:0005829,cytosol; GO:0005634,nucleus; GO:0051087,chaperone binding; GO:0051879,Hsp90 protein binding; GO:0051085,chaperone cofactor-dependent protein refolding; GO:0051131,chaperone-mediated protein complex assembly; GO:0006457,protein folding; GO:0009408,response to heat; GO:0003674,molecular_function; GO:0005488,binding; GO:0005515,protein b…	--
33	MELO3C004449.2	4.5799	3.834	4.2719	3.8727	4.2842	4.4998	1.0383	1.0512	0.8796	1.2164	2.1898	1.3242	chr05	27567184	27570738	-	K20718 LRR receptor-like serine/threonine-protein kinase ERECTA [EC:2.7.11.1] | (RefSeq) PTH-1; LRR receptor-like serine/threonine-protein kinase ERL1 (A)	ko04016: MAPK signaling pathway - plant	leucine-rich repeat receptor-like protein kinase TDR [Cucumis melo var. makuwa]	TDR_ARATH RecName: Full=Leucine-rich repeat receptor-like protein kinase TDR; EC=2.7.11.1; AltName: Full=Protein PHLOEM INTERCALATED WITH XYLEM {ECO:0000303|PubMed:17570668}; AltName: Full=Tracheary element differentiation inhibitory factor receptor {ECO:0000303|PubMed:18812507}; Short=AtTDR {ECO:0000303|PubMed:18812507}; Short=TDIF receptor {ECO:0000303|PubMed:18812507}; Flags: Precursor;	A0A1S3C597_CUCME SubName: Full=leucine-rich repeat receptor-like protein kinase TDR {ECO:0000313|RefSeq:XP_008456752.1};	--	GO:0016021,integral component of membrane; GO:0005886,plasma membrane; GO:0005524,ATP binding; GO:0106310,protein serine kinase activity; GO:0004674,protein serine/threonine kinase activity; GO:0051301,cell division; GO:0010087,phloem or xylem histogenesis; GO:0010067,procambium histogenesis; GO:0006468,protein phosphorylation; GO:0010223,secondary shoot formation; GO:0010089,xylem development; G…	PF13855.9:Leucine rich repeat
34	MELO3C004502.2	3.4679	2.0168	2.5064	2.8095	2.9834	2.7634	1.1371	0.9337	1.3736	0.5701	1.669	1.0182	chr05	28064371	28065177	-	--	--	uncharacterized protein LOC120080255 [Benincasa hispida]	--	A0A1S3C5Q6_CUCME SubName: Full=uncharacterized protein LOC103497202 {ECO:0000313|RefSeq:XP_008457539.1};	--	GO:0016021,integral component of membrane; GO:0005575,cellular_component; GO:0016020,membrane; GO:0031224,intrinsic component of membrane; GO:0110165,cellular anatomical entity	--
35	MELO3C004551.2	2.5824	1.51	1.5552	1.4039	0.9748	0.9609	0.4722	0.2302	0.2718	0.188	0.2935	0.194	chr05	28496148	28502183	-	K18443 golgi-specific brefeldin A-resistance guanine nucleotide exchange factor 1 | (RefSeq) ARF guanine-nucleotide exchange factor GNL2 (A)	ko04144: Endocytosis	ARF guanine-nucleotide exchange factor GNL2 [Cucumis melo]	GNL2_ARATH RecName: Full=ARF guanine-nucleotide exchange factor GNL2; AltName: Full=Protein GNOM-like 2;	A0A1S3C8R1_CUCME SubName: Full=ARF guanine-nucleotide exchange factor GNL2 {ECO:0000313|RefSeq:XP_008458277.1};	Pattern-formation protein/guanine nucleotide exchange factor	GO:0005829,cytosol; GO:0016020,membrane; GO:0090406,pollen tube; GO:0005085,guanyl-nucleotide exchange factor activity; GO:0009846,pollen germination; GO:0015031,protein transport; GO:0032012,regulation of ARF protein signal transduction; GO:0003674,molecular_function; GO:0030234,enzyme regulator activity; GO:0030695,GTPase regulator activity; GO:0060589,nucleoside-triphosphatase regulator activi…	PF01369.23:Sec7 domain
36	MELO3C004801.2	11.8095	11.1945	12.4729	28.4382	26.6825	29.5979	7.2067	5.0506	5.8558	12.6568	8.4737	5.3269	chr12	9955290	9957236	-	K20617 cytochrome P450 family 71 subfamily A | (RefSeq) cytochrome P450 71A1-like (A)	--	cytochrome P450 71A1-like [Cucumis melo var. makuwa]	C7113_PRUMU RecName: Full=Cytochrome P450 71AP13 {ECO:0000303|PubMed:25015725}; EC=1.14.-.- {ECO:0000305};	A0A5A7VFB1_CUCME SubName: Full=Cytochrome P450 71A1-like {ECO:0000313|EMBL:KAA0065890.1};	Cytochrome P450 CYP2 subfamily	GO:0016021,integral component of membrane; GO:0020037,heme binding; GO:0005506,iron ion binding; GO:0004497,monooxygenase activity; GO:0016705,oxidoreductase activity, acting on paired donors, with incorporation or reduction of molecular oxygen; GO:0003674,molecular_function; GO:0005488,binding; GO:0046906,tetrapyrrole binding; GO:0097159,organic cyclic compound binding; GO:1901363,heterocyclic c…	PF00067.25:Cytochrome P450
37	MELO3C005095.2	9.2806	9.1328	8.2372	10.2595	8.372	8.0743	5.4546	3.7257	3.5248	2.9772	7.0716	3.1251	chr09	17045530	17049586	+	K13436 pto-interacting protein 1 [EC:2.7.11.1] | (RefSeq) PTI1-like tyrosine-protein kinase 1 (A)	ko04626: Plant-pathogen interaction	proline-rich receptor-like protein kinase PERK3 [Cucumis melo]	PERK3_ARATH RecName: Full=Proline-rich receptor-like protein kinase PERK3; EC=2.7.11.1; AltName: Full=Proline-rich extensin-like receptor kinase 3; Short=AtPERK3;	A0A5A7VK52_CUCME SubName: Full=Proline-rich receptor-like protein kinase PERK3 {ECO:0000313|EMBL:KAA0066091.1};	Serine/threonine protein kinase	GO:0016021,integral component of membrane; GO:0005886,plasma membrane; GO:0005524,ATP binding; GO:0106310,protein serine kinase activity; GO:0004674,protein serine/threonine kinase activity; GO:0006468,protein phosphorylation; GO:0000166,nucleotide binding; GO:0003674,molecular_function; GO:0005488,binding; GO:0017076,purine nucleotide binding; GO:0030554,adenyl nucleotide binding; GO:0032553,rib…	PF07714.20:Protein tyrosine and serine/threonine kinase
38	MELO3C005149.2	9.9245	10.0221	8.3702	128.239	135.071	148.399	1.0886	1.6905	1.3747	14.1335	7.5959	8.5286	chr09	17792653	17798238	-	--	--	uncharacterized protein LOC103503468 isoform X1 [Cucumis melo]	--	A0A1S3CRC3_CUCME SubName: Full=uncharacterized protein LOC103503468 isoform X1 {ECO:0000313|RefSeq:XP_008465887.1};	--	--	PF13369.9:Transglutaminase-like superfamily
39	MELO3C005484.2	11.9337	8.4915	8.5727	8.7039	9.9	8.6933	5.9948	4.8677	3.2595	1.7437	2.9855	1.638	chr09	21900348	21902932	+	K14638 solute carrier family 15 (peptide/histidine transporter), member 3/4 | (RefSeq) protein NRT1/ PTR FAMILY 5.10-like (A)	--	protein NRT1/ PTR FAMILY 5.10-like isoform X3 [Cucumis melo]	PTR9_ARATH RecName: Full=Protein NRT1/ PTR FAMILY 5.10; Short=AtNPF5.10;	A0A1S4DSV9_CUCME SubName: Full=protein NRT1/ PTR FAMILY 5.10-like {ECO:0000313|RefSeq:XP_016898794.1, ECO:0000313|RefSeq:XP_016898795.1};	H+/oligopeptide symporter	GO:0016021,integral component of membrane; GO:0071916,dipeptide transmembrane transporter activity; GO:0042937,tripeptide transmembrane transporter activity; GO:0003674,molecular_function; GO:0005215,transporter activity; GO:0008509,anion transmembrane transporter activity; GO:0015075,ion transmembrane transporter activity; GO:0022857,transmembrane transporter activity; GO:0035673,oligopeptide tr…	PF00854.24:POT family
40	MELO3C005485.2	88.5814	87.3349	78.5798	20.9613	22.2272	17.624	21.8319	17.5034	14.5946	4.948	10.5323	5.4352	chr09	21904889	21907463	+	K14638 solute carrier family 15 (peptide/histidine transporter), member 3/4 | (RefSeq) protein NRT1/ PTR FAMILY 5.10-like (A)	--	protein NRT1/ PTR FAMILY 5.10-like isoform X4 [Cucumis melo]	PTR9_ARATH RecName: Full=Protein NRT1/ PTR FAMILY 5.10; Short=AtNPF5.10;	A0A5A7TPY8_CUCME SubName: Full=Protein NRT1/ PTR FAMILY 5.10-like {ECO:0000313|EMBL:KAA0043475.1};	H+/oligopeptide symporter	GO:0016021,integral component of membrane; GO:0071916,dipeptide transmembrane transporter activity; GO:0042937,tripeptide transmembrane transporter activity; GO:0003674,molecular_function; GO:0005215,transporter activity; GO:0008509,anion transmembrane transporter activity; GO:0015075,ion transmembrane transporter activity; GO:0022857,transmembrane transporter activity; GO:0035673,oligopeptide tr…	PF00854.24:POT family
41	MELO3C005487.2	19.6417	18.0202	16.3957	11.5428	12.2573	8.9559	8.6815	5.9091	3.7526	2.0343	5.3344	1.8858	chr09	21916044	21919413	+	K14638 solute carrier family 15 (peptide/histidine transporter), member 3/4 | (RefSeq) protein NRT1/ PTR FAMILY 5.10-like (A)	--	uncharacterized protein LOC103483057 [Cucumis melo]	PTR9_ARATH RecName: Full=Protein NRT1/ PTR FAMILY 5.10; Short=AtNPF5.10;	A0A5A7TNX4_CUCME SubName: Full=Protein NRT1/ PTR FAMILY 5.10-like isoform X1 {ECO:0000313|EMBL:KAA0043477.1};	H+/oligopeptide symporter	GO:0016021,integral component of membrane; GO:0071916,dipeptide transmembrane transporter activity; GO:0042937,tripeptide transmembrane transporter activity; GO:0003674,molecular_function; GO:0005215,transporter activity; GO:0008509,anion transmembrane transporter activity; GO:0015075,ion transmembrane transporter activity; GO:0022857,transmembrane transporter activity; GO:0035673,oligopeptide tr…	PF00854.24:POT family
42	MELO3C005578.2	84.2322	80.9977	89.9602	80.0526	74.9531	102.922	19.2908	23.1977	37.0114	45.1243	25.7511	35.4298	chr09	22629667	22633961	-	K00276 primary-amine oxidase [EC:1.4.3.21] | (RefSeq) primary amine oxidase-like (A)	ko00260: Glycine, serine and threonine metabolism; ko00350: Tyrosine metabolism; ko00360: Phenylalanine metabolism; ko00410: beta-Alanine metabolism; ko00950: Isoquinoline alkaloid biosynthesis; ko00960: Tropane, piperidine and pyridine alkaloid biosynthesis; ko01100: Metabolic pathways; ko01110: Biosynthesis of secondary metabolites	amine oxidase [copper-containing]	CAOG1_ARATH RecName: Full=Amine oxidase [copper-containing] gamma 1 {ECO:0000303|PubMed:31862580}; Short=AtCuAO1 {ECO:0000303|PubMed:21471330, ECO:0000303|PubMed:23915037}; Short=AtCuAOgamma1 {ECO:0000303|PubMed:31862580}; Short=Copper amine oxidase 1 {ECO:0000303|PubMed:21471330}; EC=1.4.3.21 {ECO:0000269|PubMed:23915037}; AltName: Full=Primary amine oxidase 1 {ECO:0000305}; Flags: Precursor;	A0A1S3ATW6_CUCME RecName: Full=Amine oxidase {ECO:0000256|RuleBase:RU000672}; EC=1.4.3.- {ECO:0000256|RuleBase:RU000672};	Copper amine oxidase	GO:0005615,extracellular space; GO:0052595,aliphatic-amine oxidase activity; GO:0052594,aminoacetone:oxygen oxidoreductase(deaminating) activity; GO:0005507,copper ion binding; GO:0052596,phenethylamine:oxygen oxidoreductase (deaminating) activity; GO:0008131,primary amine oxidase activity; GO:0048038,quinone binding; GO:0052593,tryptamine:oxygen oxidoreductase (deaminating) activity; GO:0009738,…	PF01179.23:Copper amine oxidase, enzyme domain
43	MELO3C005710.2	23.2252	25.2376	31.3273	32.5229	29.917	32.0662	2.1238	4.5419	7.9695	17.6965	11.5812	11.2316	chr09	23657462	23658288	+	--	--	heavy metal-associated isoprenylated plant protein 39 [Cucumis melo]	HIP39_ARATH RecName: Full=Heavy metal-associated isoprenylated plant protein 39 {ECO:0000303|PubMed:21072340, ECO:0000303|PubMed:23368984}; Short=AtHIP39 {ECO:0000303|PubMed:21072340, ECO:0000303|PubMed:23368984}; Flags: Precursor;	A0A1S3ATW9_CUCME SubName: Full=heavy metal-associated isoprenylated plant protein 3 {ECO:0000313|RefSeq:XP_008437332.1};	Copper chaperone	GO:0046872,metal ion binding; GO:0003674,molecular_function; GO:0005488,binding; GO:0043167,ion binding; GO:0043169,cation binding	PF00403.29:Heavy-metal-associated domain
44	MELO3C005737.2	2.1291	2.4816	1.9035	1.1515	1.8376	2.4203	0.0997	0.4379	0.5586	0.645	0.4854	0.774	chr09	23864788	23869436	+	K04424 sterile alpha motif and leucine zipper containing kinase AZK [EC:2.7.11.25] | (RefSeq) serine/threonine-protein kinase EDR1 (A)	--	putative serine/threonine-protein kinase [Cucumis melo var. makuwa]	PHY1_CERPU RecName: Full=Light-sensor Protein kinase; Includes: RecName: Full=Phytochrome; Includes: RecName: Full=Protein kinase; EC=2.7.11.1;	A0A1S3AU03_CUCME SubName: Full=probable serine/threonine-protein kinase DDB_G0268876 {ECO:0000313|RefSeq:XP_008437376.1, ECO:0000313|RefSeq:XP_008437377.1};	Tyrosine kinase specific for activated (GTP-bound) p21cdc42Hs	GO:0005886,plasma membrane; GO:0005524,ATP binding; GO:0009882,blue light photoreceptor activity; GO:0106310,protein serine kinase activity; GO:0004674,protein serine/threonine kinase activity; GO:0009584,detection of visible light; GO:0006468,protein phosphorylation; GO:0006355,regulation of transcription, DNA-templated; GO:0000166,nucleotide binding; GO:0003674,molecular_function; GO:0005488,bi…	PF06760.14:Protein of unknown function (DUF1221)
45	MELO3C005817.2	55.0792	28.9514	39.1975	38.478	33.6997	31.0194	10.8861	14.6232	16.4388	17.9087	11.4328	10.1493	chr09	24536633	24540050	-	K09874 aquaporin NIP | (RefSeq) probable aquaporin NIP5-1 (A)	--	aquaporin NIP5-2 [Cucumis melo]	NIP51_ARATH RecName: Full=Probable aquaporin NIP5-1; AltName: Full=NOD26-like intrinsic protein 5-1; Short=AtNIP5;1; AltName: Full=Nodulin-26-like major intrinsic protein 6; Short=NodLikeMip6; Short=Protein NLM6;	A0A1S3AUA5_CUCME SubName: Full=probable aquaporin NIP5-1 {ECO:0000313|RefSeq:XP_008437496.1};	Aquaporin (major intrinsic protein family)	GO:0016021,integral component of membrane; GO:0016328,lateral plasma membrane; GO:0005886,plasma membrane; GO:0046715,active borate transmembrane transporter activity; GO:0015105,arsenite transmembrane transporter activity; GO:0015250,water channel activity; GO:0015700,arsenite transport; GO:0046713,borate transport; GO:0080029,cellular response to boron-containing substance levels; GO:0046685,re…	PF00230.23:Major intrinsic protein
46	MELO3C005932.2	8.9457	6.5621	7.8309	9.5032	9.133	10.564	0.7018	0.8268	0.5202	2.4276	2.1685	2.3042	chr06	53146	65009	+	K21848 lipid intermediate transporter | (RefSeq) protein arv1 homolog (A)	--	protein ARV 1 isoform X1 [Cucumis sativus]	ARV1_ARATH RecName: Full=Protein ARV 1 {ECO:0000303|PubMed:16725371}; Short=AtArv1p {ECO:0000303|PubMed:16725371};	A0A0A0L5K8_CUCSA RecName: Full=Protein ARV {ECO:0000256|RuleBase:RU368065};	Predicted membrane protein	GO:0032541,cortical endoplasmic reticulum; GO:0005783,endoplasmic reticulum; GO:0005789,endoplasmic reticulum membrane; GO:0005794,Golgi apparatus; GO:0016021,integral component of membrane; GO:0032366,intracellular sterol transport; GO:0097036,regulation of plasma membrane sterol distribution; GO:0006665,sphingolipid metabolic process; GO:0016125,sterol metabolic process; GO:0006810,transport; G…	PF04161.16:Arv1-like family
47	MELO3C006477.2	43.7521	29.9938	39.6235	9.4449	7.6426	6.6254	30.0435	14.5534	10.4912	3.8374	5.47	1.9777	chr06	3530551	3532151	+	K14484 auxin-responsive protein IAA | (RefSeq) auxin-responsive protein IAA4-like (A)	ko04075: Plant hormone signal transduction	auxin-responsive protein IAA4-like [Cucumis melo]	IAA4_ARATH RecName: Full=Auxin-responsive protein IAA4; AltName: Full=Auxin-induced protein AUX2-11; AltName: Full=Indoleacetic acid-induced protein 4;	A0A5A7U4N6_CUCME RecName: Full=Auxin-responsive protein {ECO:0000256|RuleBase:RU004549};	--	GO:0005634,nucleus; GO:0003677,DNA binding; GO:0003700,DNA-binding transcription factor activity; GO:0042802,identical protein binding; GO:0000976,transcription regulatory region sequence-specific DNA binding; GO:0009734,auxin-activated signaling pathway; GO:0009733,response to auxin; GO:0003674,molecular_function; GO:0003676,nucleic acid binding; GO:0005488,binding; GO:0097159,organic cyclic com…	PF02309.19:AUX/IAA family
48	MELO3C006588.2	23.1963	19.3261	17.3579	18.5145	15.2995	16.1175	8.2155	7.3623	8.4925	8.5953	7.1935	7.3959	chr06	4390063	4390742	+	--	--	protein DMP2-like [Cucumis melo]	DMP2_ARATH RecName: Full=Protein DMP2 {ECO:0000303|PubMed:20712629}; Short=AtDMP2 {ECO:0000303|PubMed:20712629};	A0A0A0L7S6_CUCSA SubName: Full=Uncharacterized protein {ECO:0000313|EMBL:KGN57049.1};	--	GO:0005783,endoplasmic reticulum; GO:0005789,endoplasmic reticulum membrane; GO:0016021,integral component of membrane; GO:0009705,plant-type vacuole membrane; GO:0009838,abscission; GO:0010256,endomembrane system organization; GO:0007275,multicellular organism development; GO:0008150,biological_process; GO:0032501,multicellular organismal process; GO:0032502,developmental process; GO:0048856,ana…	PF05078.15:Protein of unknown function (DUF679)
49	MELO3C006677.2	34.7209	32.8745	27.5961	30.4669	37.0527	29.8648	15.3435	14.5534	17.1808	6.0757	9.7025	5.4809	chr06	4987366	4989906	+	K10418 dynein light chain LC8-type | (RefSeq) dynein light chain 1, cytoplasmic-like (A)	--	uncharacterized protein LOC103483858 [Cucumis melo]	DYL1_CHLRE RecName: Full=Dynein 8 kDa light chain, flagellar outer arm;	A0A1S4DSP2_CUCME RecName: Full=Dynein light chain {ECO:0000256|RuleBase:RU365010};	Dynein light chain type 1	GO:0005930,axoneme; GO:0097014,ciliary plasm; GO:0030286,dynein complex; GO:0005874,microtubule; GO:0031514,motile cilium; GO:0007017,microtubule-based process; GO:0044458,motile cilium assembly; GO:0008150,biological_process; GO:0009987,cellular process; GO:0006996,organelle organization; GO:0016043,cellular component organization; GO:0022607,cellular component assembly; GO:0030030,cell projecti…	PF01221.21:Dynein light chain type 1
50	MELO3C006943.2	19.0385	21.8027	18.5433	35.8661	34.5056	44.641	5.9353	4.5668	4.4252	13.0605	11.0398	11.2818	chr06	7566697	7571748	+	--	--	uncharacterized protein LOC103484119 [Cucumis melo]	--	A0A1S3AZ41_CUCME SubName: Full=uncharacterized membrane protein YjcL-like {ECO:0000313|RefSeq:XP_008439290.1};	--	GO:0016021,integral component of membrane; GO:0005575,cellular_component; GO:0016020,membrane; GO:0031224,intrinsic component of membrane; GO:0110165,cellular anatomical entity	PF05684.15:Protein of unknown function (DUF819)
51	MELO3C006959.2	9.1457	7.2085	6.807	10.5052	8.5145	9.3937	3.4121	1.6445	0.7588	1.501	1.1861	0.6874	chr06	7714731	7715672	+	K20723 reticulon-3 | (RefSeq) reticulon-like protein B11 (A)	--	reticulon family protein [Cucumis melo var. makuwa]	RTNLA_ARATH RecName: Full=Reticulon-like protein B1; Short=AtRTNLB1; AltName: Full=VirB2-interacting protein 1;	A0A5A7SRA4_CUCME RecName: Full=Reticulon-like protein {ECO:0000256|RuleBase:RU363132};	Reticulon	GO:0005783,endoplasmic reticulum; GO:0005789,endoplasmic reticulum membrane; GO:0071782,endoplasmic reticulum tubular network; GO:0071458,integral component of cytoplasmic side of endoplasmic reticulum membrane; GO:0000325,plant-type vacuole; GO:0005886,plasma membrane; GO:0071786,endoplasmic reticulum tubular network organization; GO:0009617,response to bacterium; GO:0006996,organelle organizati…	PF02453.20:Reticulon
52	MELO3C007264.2	7.6317	6.5803	6.4121	11.238	14.6565	10.3406	3.1606	2.1524	0.8149	1.674	5.541	2.8608	chr08	1808752	1809714	+	--	--	uncharacterized protein LOC103484500 [Cucumis melo]	--	A0A1S3B0C9_CUCME SubName: Full=uncharacterized protein LOC103484500 {ECO:0000313|RefSeq:XP_008439814.1};	--	--	--
53	MELO3C007442.2	4.384	5.3185	5.3654	12.8202	11.7291	12.3097	1.9453	2.4879	2.3373	4.3712	4.738	3.3301	chr08	2809269	2812830	-	K08150 MFS transporter, SP family, solute carrier family 2 (myo-inositol transporter), member 13 | (RefSeq) inositol transporter 4 (A)	--	inositol transporter 4 [Cucumis melo]	INT4_ARATH RecName: Full=Inositol transporter 4; AltName: Full=Myo-inositol-proton symporter INT4; AltName: Full=Protein INOSITOL TRANSPORTER 4;	A0A1S3B0W5_CUCME SubName: Full=inositol transporter 4 {ECO:0000313|RefSeq:XP_008440077.1, ECO:0000313|RefSeq:XP_008440078.1};	Predicted transporter (major facilitator superfamily)	GO:0016021,integral component of membrane; GO:0016020,membrane; GO:0005886,plasma membrane; GO:0005366,myo-inositol:proton symporter activity; GO:0022857,transmembrane transporter activity; GO:0015798,myo-inositol transport; GO:0055085,transmembrane transport; GO:0003674,molecular_function; GO:0005215,transporter activity; GO:0005365,myo-inositol transmembrane transporter activity; GO:0008324,cat…	PF00083.27:Sugar (and other) transporter
54	MELO3C008106.2	10.3522	11.8396	10.0994	13.6758	16.0286	16.0322	1.5733	1.9691	1.5317	4.386	2.9058	3.1223	chr03	611371	622012	-	K03123 transcription initiation factor TFIIA small subunit | (RefSeq) transcription initiation factor IIA subunit 2 (A)	ko03022: Basal transcription factors	transcription initiation factor IIA subunit 2 isoform X1 [Cucumis melo]	T2AG_ORYSI RecName: Full=Transcription initiation factor IIA subunit 2; AltName: Full=General transcription factor IIA subunit 2; AltName: Full=Transcription initiation factor IIA gamma chain; Short=TFIIA-gamma;	A0A1S3B2F6_CUCME RecName: Full=Transcription initiation factor IIA subunit 2 {ECO:0000256|PIRNR:PIRNR009415};	Transcription initiation factor IIA, gamma subunit	GO:0005672,transcription factor TFIIA complex; GO:0003743,translation initiation factor activity; GO:0006952,defense response; GO:0006367,transcription initiation from RNA polymerase II promoter; GO:0003674,molecular_function; GO:0003676,nucleic acid binding; GO:0003723,RNA binding; GO:0005488,binding; GO:0008135,translation factor activity, RNA binding; GO:0045182,translation regulator activity;…	PF02268.19:Transcription initiation factor IIA, gamma subunit, helical domain
55	MELO3C008226.2	2.4193	1.6747	1.3464	3.7603	4.8971	4.5805	0.4148	0.3998	0.205	1.3849	1.2112	0.8543	chr03	2117888	2121430	-	K16277 E3 ubiquitin-protein ligase DRIP [EC:2.3.2.27] | (RefSeq) E3 ubiquitin protein ligase DRIP2-like (A)	--	E3 ubiquitin protein ligase DRIP2-like [Cucumis melo]	DRIP2_ARATH RecName: Full=E3 ubiquitin protein ligase DRIP2; EC=2.3.2.27 {ECO:0000269|PubMed:18552202}; AltName: Full=DREB2A-interacting protein 2; AltName: Full=RING-type E3 ubiquitin transferase DRIP2 {ECO:0000305};	A0A1S4DTS9_CUCME SubName: Full=uncharacterized protein LOC103485514 {ECO:0000313|RefSeq:XP_016899394.1};	Locus-specific chromosome binding proteins	GO:0046872,metal ion binding; GO:0004842,ubiquitin-protein transferase activity; GO:0051865,protein autoubiquitination; GO:0016567,protein ubiquitination; GO:0009414,response to water deprivation; GO:0003674,molecular_function; GO:0005488,binding; GO:0043167,ion binding; GO:0043169,cation binding; GO:0003824,catalytic activity; GO:0016740,transferase activity; GO:0019787,ubiquitin-like protein tr…	--
56	MELO3C008322.2	2.2969	1.7247	2.2205	4.6955	3.5313	4.4025	0	0	0.0798	0.0911	0.0561	0.0723	chr03	3643178	3650531	-	--	--	ring canal kelch-like protein isoform X1 [Cucumis melo var. makuwa]	B2_DAUCA RecName: Full=B2 protein;	A0A5A7UGQ1_CUCME SubName: Full=Ring canal kelch-like protein isoform X1 {ECO:0000313|EMBL:KAA0054992.1};	--	GO:0005768,endosome; GO:0010941,regulation of cell death; GO:1904350,regulation of protein catabolic process in the vacuole; GO:0034976,response to endoplasmic reticulum stress; GO:1902074,response to salt; GO:0008150,biological_process; GO:0008219,cell death; GO:0009987,cellular process; GO:0050789,regulation of biological process; GO:0050794,regulation of cellular process; GO:0065007,biological…	PF01344.28:Kelch motif
57	MELO3C008337.2	3.075	4.6608	6.5273	5.8372	10.2114	13.4129	0	0	0	0	0	0	chr03	3939313	3939531	-	--	--	G-box-binding factor 4 isoform X3 [Cucumis melo var. makuwa]	--	A0A5D3DGL4_CUCME SubName: Full=G-box-binding factor 4 isoform X3 {ECO:0000313|EMBL:TYK22754.1};	--	GO:0005634,nucleus; GO:0003700,DNA-binding transcription factor activity; GO:0045893,positive regulation of transcription, DNA-templated; GO:0003674,molecular_function; GO:0140110,transcription regulator activity; GO:0006139,nucleobase-containing compound metabolic process; GO:0006351,transcription, DNA-templated; GO:0006355,regulation of transcription, DNA-templated; GO:0006725,cellular aromatic…	--
58	MELO3C008375.2	20.6804	23.7377	15.8303	29.579	25.0613	22.5022	11.0021	3.6102	2.7762	2.0595	14.4841	5.5021	chr03	4756099	4756356	+	--	--	hypothetical protein Csa_021653 [Cucumis sativus]	--	A0A5D3CL93_CUCME SubName: Full=Uncharacterized protein {ECO:0000313|EMBL:TYK11009.1};	--	--	--
59	MELO3C008436.2	1.7662	2.2468	2.2495	5.1815	8.2513	4.7397	0	0	0	0	0	0	chr03	6178133	6181590	-	K13430 serine/threonine-protein kinase PBS1 [EC:2.7.11.1] | (RefSeq) serine/threonine-protein kinase PBS1 (A)	ko04626: Plant-pathogen interaction	wall-associated receptor kinase 2-like [Cucumis melo var. makuwa]	WAK2_ARATH RecName: Full=Wall-associated receptor kinase 2; EC=2.7.11.-; Flags: Precursor;	A0A5D3DKI3_CUCME SubName: Full=Wall-associated receptor kinase 2-like {ECO:0000313|EMBL:TYK23789.1};	--	GO:0016021,integral component of membrane; GO:0005634,nucleus; GO:0005886,plasma membrane; GO:0005524,ATP binding; GO:0005509,calcium ion binding; GO:0030247,polysaccharide binding; GO:0106310,protein serine kinase activity; GO:0004674,protein serine/threonine kinase activity; GO:0007166,cell surface receptor signaling pathway; GO:0009992,cellular water homeostasis; GO:0009311,oligosaccharide met…	PF07714.20:Protein tyrosine and serine/threonine kinase
60	MELO3C008442.2	0.9086	0.8382	0.7083	0.6108	0.8623	0.8028	0	0	0	0.0161	0.0083	0	chr03	6308951	6312784	-	K13430 serine/threonine-protein kinase PBS1 [EC:2.7.11.1] | (RefSeq) serine/threonine-protein kinase PBS1 (A)	ko04626: Plant-pathogen interaction	wall-associated receptor kinase 2-like [Cucumis melo var. makuwa]	WAK2_ARATH RecName: Full=Wall-associated receptor kinase 2; EC=2.7.11.-; Flags: Precursor;	A0A5D3DFR4_CUCME SubName: Full=Wall-associated receptor kinase 2-like {ECO:0000313|EMBL:TYK22298.1};	--	GO:0016021,integral component of membrane; GO:0005634,nucleus; GO:0005886,plasma membrane; GO:0005524,ATP binding; GO:0005509,calcium ion binding; GO:0030247,polysaccharide binding; GO:0106310,protein serine kinase activity; GO:0004674,protein serine/threonine kinase activity; GO:0007166,cell surface receptor signaling pathway; GO:0009992,cellular water homeostasis; GO:0009311,oligosaccharide met…	PF07714.20:Protein tyrosine and serine/threonine kinase
61	MELO3C009221.2	58.1695	50.7238	63.474	23.385	20.8733	20.898	13.4087	11.6961	10.2676	13.0492	10.3235	8.1861	chr04	33504241	33505429	+	K10418 dynein light chain LC8-type | (RefSeq) dynein light chain 1, cytoplasmic-like (A)	--	hypothetical protein Csa_001625 [Cucumis sativus]	DYL1_CHLRE RecName: Full=Dynein 8 kDa light chain, flagellar outer arm;	A0A1S3B5U2_CUCME RecName: Full=Dynein light chain {ECO:0000256|RuleBase:RU365010};	Dynein light chain type 1	GO:0005930,axoneme; GO:0097014,ciliary plasm; GO:0030286,dynein complex; GO:0005874,microtubule; GO:0031514,motile cilium; GO:0007017,microtubule-based process; GO:0044458,motile cilium assembly; GO:0008150,biological_process; GO:0009987,cellular process; GO:0006996,organelle organization; GO:0016043,cellular component organization; GO:0022607,cellular component assembly; GO:0030030,cell projecti…	PF01221.21:Dynein light chain type 1
62	MELO3C009341.2	1.2044	1.6082	0.8348	1.5044	1.7141	2.4497	0.4475	0.5503	0.5033	0.6474	0.5042	0.5596	chr04	32773281	32775646	-	--	--	BTB/POZ domain-containing protein At5g03250 isoform X1 [Cucumis melo]	Y5325_ARATH RecName: Full=BTB/POZ domain-containing protein At5g03250;	A0A5A7TS19_CUCME SubName: Full=BTB/POZ domain-containing protein {ECO:0000313|EMBL:KAA0044009.1};	--	GO:0016567,protein ubiquitination; GO:0006464,cellular protein modification process; GO:0006807,nitrogen compound metabolic process; GO:0008150,biological_process; GO:0008152,metabolic process; GO:0009987,cellular process; GO:0019538,protein metabolic process; GO:0032446,protein modification by small protein conjugation; GO:0036211,protein modification process; GO:0043170,macromolecule metabolic …	PF03000.17:NPH3 family
63	MELO3C009755.2	8.846	29.2603	9.0448	27.4903	34.6431	34.8985	1.0403	1.5184	1.1897	5.6321	11.3647	8.3432	chr04	29600166	29601181	+	--	--	uncharacterized protein LOC103487167 [Cucumis melo]	SIB1_ARATH RecName: Full=Sigma factor binding protein 1, chloroplastic; Short=AtsibI; Short=Sigma factor binding protein I; AltName: Full=SigA binding protein; AltName: Full=VQ motif-containing protein 23 {ECO:0000303|PubMed:22535423}; Short=AtVQ23 {ECO:0000303|PubMed:22535423}; Flags: Precursor;	A0A5D3DPQ4_CUCME SubName: Full=Sigma factor binding protein 2 {ECO:0000313|EMBL:TYK25522.1};	--	GO:0009507,chloroplast; GO:0005634,nucleus; GO:0071482,cellular response to light stimulus; GO:0042742,defense response to bacterium; GO:0051091,positive regulation of DNA-binding transcription factor activity; GO:0008150,biological_process; GO:0009314,response to radiation; GO:0009416,response to light stimulus; GO:0009628,response to abiotic stimulus; GO:0009987,cellular process; GO:0050896,res…	PF05678.17:VQ motif
64	MELO3C010697.2	3.5269	4.3435	2.8503	4.1211	6.6199	7.83	1.0023	1.5854	1.2954	3.1307	2.8051	3.6589	chr03	31421805	31422979	+	K03517 quinolinate synthase [EC:2.5.1.72] | (RefSeq) quinolinate synthase, chloroplastic (A)	ko00760: Nicotinate and nicotinamide metabolism; ko01100: Metabolic pathways; ko01240: Biosynthesis of cofactors	sufE-like protein 2, chloroplastic [Cucumis melo]	SUFE2_ARATH RecName: Full=SufE-like protein 2, chloroplastic; AltName: Full=Protein SULFUR E 2;	A0A1S3BAY5_CUCME SubName: Full=sufE-like protein 2, chloroplastic {ECO:0000313|RefSeq:XP_008444379.1};	--	GO:0009507,chloroplast; GO:0008047,enzyme activator activity; GO:0016226,iron-sulfur cluster assembly; GO:0051176,positive regulation of sulfur metabolic process; GO:0003674,molecular_function; GO:0030234,enzyme regulator activity; GO:0098772,molecular function regulator; GO:0006790,sulfur compound metabolic process; GO:0008150,biological_process; GO:0008152,metabolic process; GO:0009987,cellular…	PF02657.18:Fe-S metabolism associated domain
65	MELO3C010988.2	0.5439	0.6042	0.4667	1.7826	1.4714	2.4733	0.028	0.0449	0	0	0.0584	0	chr03	29540524	29545902	-	K11498 centromeric protein E | (RefSeq) kinesin-like protein NACK1 (A)	--	kinesin-like protein KIN-7E [Cucumis melo]	KN7F_ORYSJ RecName: Full=Kinesin-like protein KIN-7F {ECO:0000305};	A0A5A7VH67_CUCME RecName: Full=Kinesin-like protein {ECO:0000256|RuleBase:RU000394};	Kinesin-like protein	GO:0005874,microtubule; GO:0005524,ATP binding; GO:0016887,ATPase activity; GO:0008017,microtubule binding; GO:0003777,microtubule motor activity; GO:0007018,microtubule-based movement; GO:0000166,nucleotide binding; GO:0003674,molecular_function; GO:0005488,binding; GO:0017076,purine nucleotide binding; GO:0030554,adenyl nucleotide binding; GO:0032553,ribonucleotide binding; GO:0032555,purine ri…	PF00225.26:Kinesin motor domain
66	MELO3C011224.2	1.3972	1.4921	1.7228	5.6406	4.407	5.0157	0.9676	0.6847	0.5901	2.4701	2.1671	1.752	chr03	27674922	27682545	+	K05681 ATP-binding cassette, subfamily G (WHITE), member 2 | (RefSeq) ABC transporter G family member 9-like (A)	ko02010: ABC transporters	pleiotropic drug resistance protein 1-like [Cucumis melo]	PDR1_PETAX RecName: Full=Pleiotropic drug resistance protein 1 {ECO:0000303|PubMed:22398443}; Short=PaPDR1 {ECO:0000303|PubMed:25683808}; AltName: Full=ABC transporter G family PDR1 {ECO:0000305}; AltName: Full=Strigolactone transporter {ECO:0000305};	A0A1S3BBZ3_CUCME SubName: Full=pleiotropic drug resistance protein 1-like {ECO:0000313|RefSeq:XP_008445146.1};	Pleiotropic drug resistance proteins (PDR1-15), ABC superfamily	GO:0016021,integral component of membrane; GO:0005886,plasma membrane; GO:0140359,ABC-type transporter activity; GO:0005524,ATP binding; GO:0009914,hormone transport; GO:2000032,regulation of secondary shoot formation; GO:0003674,molecular_function; GO:0003824,catalytic activity; GO:0005215,transporter activity; GO:0015399,primary active transmembrane transporter activity; GO:0016462,pyrophosphat…	PF01061.27:ABC-2 type transporter
67	MELO3C011241.2	1.7778	1.8317	1.869	8.1334	8.8986	12.8114	1.0161	0.5484	0.4218	6.6012	3.5319	5.3496	chr03	27534438	27535339	+	--	--	UPF0481 protein At3g47200-like [Cucumis melo]	Y3720_ARATH RecName: Full=UPF0481 protein At3g47200;	A0A5A7VCD8_CUCME SubName: Full=UPF0481 protein {ECO:0000313|EMBL:KAA0064944.1};	--	GO:0016021,integral component of membrane; GO:0005886,plasma membrane; GO:0005575,cellular_component; GO:0016020,membrane; GO:0031224,intrinsic component of membrane; GO:0110165,cellular anatomical entity; GO:0071944,cell periphery	PF03140.18:Plant protein of unknown function
68	MELO3C011243.2	12.5369	11.5632	7.2978	24.1365	26.0099	26.6984	2.3635	1.4838	1.798	16.2059	8.1078	11.0899	chr03	27526714	27528655	+	--	--	UPF0481 protein At3g47200-like [Cucumis melo]	Y3720_ARATH RecName: Full=UPF0481 protein At3g47200;	A0A1S3BDS2_CUCME SubName: Full=UPF0481 protein At3g47200-like {ECO:0000313|RefSeq:XP_008445584.2};	--	GO:0016021,integral component of membrane; GO:0005886,plasma membrane; GO:0005575,cellular_component; GO:0016020,membrane; GO:0031224,intrinsic component of membrane; GO:0110165,cellular anatomical entity; GO:0071944,cell periphery	PF03140.18:Plant protein of unknown function
69	MELO3C011846.2	3.4161	2.9473	2.6782	6.3794	5.9411	6.5355	2.0027	1.0845	0.9007	3.533	2.722	2.4782	chr10	4388386	4389802	-	K15032 mTERF domain-containing protein, mitochondrial | (RefSeq) transcription termination factor MTERF5, chloroplastic-like (A)	--	transcription termination factor MTERF5, chloroplastic-like [Cucumis melo]	MTEFE_ARATH RecName: Full=Transcription termination factor MTERF15, mitochondrial {ECO:0000305}; AltName: Full=Mitochondrial transcription termination factor 15 {ECO:0000303|PubMed:23087700}; Flags: Precursor;	A0A1S3BEV9_CUCME SubName: Full=transcription termination factor MTERF5, chloroplastic-like isoform X1 {ECO:0000313|RefSeq:XP_008446012.1};	Mitochondrial transcription termination factor, mTERF	GO:0009507,chloroplast; GO:0005739,mitochondrion; GO:0003690,double-stranded DNA binding; GO:0003723,RNA binding; GO:0009658,chloroplast organization; GO:0032502,developmental process; GO:0006353,DNA-templated transcription, termination; GO:0006355,regulation of transcription, DNA-templated; GO:0000394,RNA splicing, via endonucleolytic cleavage and ligation; GO:0003674,molecular_function; GO:0003…	PF02536.17:mTERF
70	MELO3C011928.2	30.3251	21.2915	31.6756	3.1155	1.9398	4.06	1.5626	1.7421	3.4887	0.9938	0.4712	0.5057	chr10	3849720	3851985	-	K20562 biphenyl-4-hydroxylase | (RefSeq) cytochrome P450 CYP736A12-like (A)	--	cytochrome P450 71B19-like [Cucumis melo var. makuwa]	C71BJ_ARATH RecName: Full=Cytochrome P450 71B19; EC=1.14.-.-;	A0A5D3CZQ9_CUCME SubName: Full=Cytochrome P450 71B19-like {ECO:0000313|EMBL:TYK15669.1};	Cytochrome P450 CYP2 subfamily	GO:0016021,integral component of membrane; GO:0020037,heme binding; GO:0005506,iron ion binding; GO:0004497,monooxygenase activity; GO:0016705,oxidoreductase activity, acting on paired donors, with incorporation or reduction of molecular oxygen; GO:0003674,molecular_function; GO:0005488,binding; GO:0046906,tetrapyrrole binding; GO:0097159,organic cyclic compound binding; GO:1901363,heterocyclic c…	PF00067.25:Cytochrome P450
71	MELO3C011929.2	24.1176	21.7319	20.7241	6.0463	8.2227	2.7629	14.4446	8.7925	8.9534	0.3396	1.3705	0.4814	chr10	3844737	3846969	-	K20617 cytochrome P450 family 71 subfamily A | (RefSeq) cytochrome P450 71A1-like (A)	--	cytochrome P450 71B37-like [Cucumis melo]	C71BY_ARATH RecName: Full=Cytochrome P450 71B37; EC=1.14.-.-;	A0A1S3BDV7_CUCME SubName: Full=cytochrome P450 71B37-like {ECO:0000313|RefSeq:XP_008446138.1};	Cytochrome P450 CYP2 subfamily	GO:0016021,integral component of membrane; GO:0016020,membrane; GO:0020037,heme binding; GO:0005506,iron ion binding; GO:0016709,oxidoreductase activity, acting on paired donors, with incorporation or reduction of molecular oxygen, NAD(P)H as one donor, and incorporation of one atom of oxygen; GO:0003674,molecular_function; GO:0005488,binding; GO:0046906,tetrapyrrole binding; GO:0097159,organic c…	PF00067.25:Cytochrome P450
72	MELO3C011930.2	77.0608	84.6437	78.4396	38.738	29.3594	30.5034	19.61	13.2548	15.0511	2.9884	4.907	2.5918	chr10	3840348	3842731	-	K20617 cytochrome P450 family 71 subfamily A | (RefSeq) cytochrome P450 71A1-like (A)	--	cytochrome P450 71B34-like [Cucumis melo]	C71BV_ARATH RecName: Full=Cytochrome P450 71B34; EC=1.14.-.-;	A0A5D3CUU2_CUCME SubName: Full=Cytochrome P450 71B34-like {ECO:0000313|EMBL:TYK15667.1};	Cytochrome P450 CYP2 subfamily	GO:0016021,integral component of membrane; GO:0016020,membrane; GO:0020037,heme binding; GO:0005506,iron ion binding; GO:0016709,oxidoreductase activity, acting on paired donors, with incorporation or reduction of molecular oxygen, NAD(P)H as one donor, and incorporation of one atom of oxygen; GO:0003674,molecular_function; GO:0005488,binding; GO:0046906,tetrapyrrole binding; GO:0097159,organic c…	PF00067.25:Cytochrome P450
73	MELO3C011931.2	1.3037	1.5699	1.1421	8.7096	9.8427	9.7331	0	0	0	0	0	0	chr10	3835054	3836821	-	K20617 cytochrome P450 family 71 subfamily A | (RefSeq) cytochrome P450 71A1-like (A)	--	cytochrome P450 71B2-like isoform X1 [Cucumis melo var. makuwa]	C71BQ_ARATH RecName: Full=Cytochrome P450 71B26; EC=1.14.-.-;	A0A1S4DW39_CUCME SubName: Full=cytochrome P450 71B26-like {ECO:0000313|RefSeq:XP_016900202.1};	Cytochrome P450 CYP2 subfamily	GO:0016021,integral component of membrane; GO:0016020,membrane; GO:0020037,heme binding; GO:0005506,iron ion binding; GO:0016709,oxidoreductase activity, acting on paired donors, with incorporation or reduction of molecular oxygen, NAD(P)H as one donor, and incorporation of one atom of oxygen; GO:0003674,molecular_function; GO:0005488,binding; GO:0046906,tetrapyrrole binding; GO:0097159,organic c…	PF00067.25:Cytochrome P450
74	MELO3C012015.2	134.572	87.5487	97.777	11.0572	8.3133	5.8468	30.2367	37.6042	35.1906	1.6742	3.0303	0.923	chr10	3255530	3258567	-	--	--	WAT1-related protein At1g70260 [Cucumis melo]	WTR11_ARATH RecName: Full=WAT1-related protein At1g70260;	A0A1S3BEK3_CUCME SubName: Full=WAT1-related protein At1g70260 {ECO:0000313|RefSeq:XP_008446238.1};	--	GO:0005783,endoplasmic reticulum; GO:0016021,integral component of membrane; GO:0005886,plasma membrane; GO:0022857,transmembrane transporter activity; GO:1900425,negative regulation of defense response to bacterium; GO:1902289,negative regulation of defense response to oomycetes; GO:1900150,regulation of defense response to fungus; GO:0003674,molecular_function; GO:0005215,transporter activity; …	PF00892.23:EamA-like transporter family
75	MELO3C012321.2	88.6083	74.9174	89.2129	11.1796	9.4654	8.6598	35.6768	32.0913	31.2285	6.8513	5.7926	2.7802	chr10	1244772	1246507	+	K10258 very-long-chain enoyl-CoA reductase [EC:1.3.1.93] | (RefSeq) very-long-chain enoyl-CoA reductase (A)	ko00062: Fatty acid elongation; ko01040: Biosynthesis of unsaturated fatty acids; ko01100: Metabolic pathways; ko01110: Biosynthesis of secondary metabolites; ko01212: Fatty acid metabolism	steroid 5-alpha-reductase DET2 [Cucumis sativus]	DET2_GOSHI RecName: Full=Steroid 5-alpha-reductase DET2 {ECO:0000303|PubMed:17565582}; Short=GhDET2 {ECO:0000303|PubMed:17565582}; EC=1.3.1.22 {ECO:0000269|PubMed:17565582};	A0A1S3BFS4_CUCME SubName: Full=steroid 5-alpha-reductase DET2-like {ECO:0000313|RefSeq:XP_008446721.1};	Steroid reductase	GO:0016021,integral component of membrane; GO:0003865,3-oxo-5-alpha-steroid 4-dehydrogenase activity; GO:0047751,cholestenone 5-alpha-reductase activity; GO:0016491,oxidoreductase activity; GO:0050213,progesterone 5-alpha-reductase activity; GO:0016132,brassinosteroid biosynthetic process; GO:0090378,seed trichome elongation; GO:0090377,seed trichome initiation; GO:0003674,molecular_function; GO:…	PF02544.19:3-oxo-5-alpha-steroid 4-dehydrogenase
76	MELO3C012329.2	4.547	3.963	3.3093	5.5844	5.3999	5.7116	0.8156	1.6607	1.2544	1.7939	2.1688	1.917	chr10	1202155	1206725	-	--	--	uncharacterized protein LOC103489366 isoform X1 [Cucumis melo]	--	A0A5D3CB16_CUCME SubName: Full=Splicing factor 3A subunit 3 {ECO:0000313|EMBL:TYK09187.1};	--	--	PF10358.12:N-terminal C2 in EEIG1 and EHBP1 proteins
77	MELO3C012382.2	82.3436	82.062	73.8282	76.2264	58.6054	50.225	40.2993	38.8439	36.958	30.276	28.7943	16.1361	chr10	830852	833415	-	--	--	non-symbiotic hemoglobin 2 [Cucumis melo]	HBL2_ARATH RecName: Full=Non-symbiotic hemoglobin 2; AltName: Full=ARAth GLB2; Short=Hb2;	A0A5A7SU63_CUCME SubName: Full=Non-symbiotic hemoglobin 2 {ECO:0000313|EMBL:KAA0034682.1};	Globins and related hemoproteins	GO:0005829,cytosol; GO:0020037,heme binding; GO:0046872,metal ion binding; GO:0019825,oxygen binding; GO:0005344,oxygen carrier activity; GO:0006631,fatty acid metabolic process; GO:0019432,triglyceride biosynthetic process; GO:0003674,molecular_function; GO:0005488,binding; GO:0046906,tetrapyrrole binding; GO:0097159,organic cyclic compound binding; GO:1901363,heterocyclic compound binding; GO:0…	PF00042.25:Globin
78	MELO3C013028.2	7.6794	8.1392	6.9355	14.5137	15.3315	15.1629	0	0	0	0	0	0	chr04	16277157	16277527	+	--	--	--	--	--	--	--	--
79	MELO3C013558.2	13.3497	8.7017	11.395	8.7601	8.8759	6.8024	4.1978	3.0916	2.739	2.9209	4.3365	2.6404	chr11	17493857	17497217	+	K14487 auxin responsive GH3 gene family | (RefSeq) jasmonic acid-amido synthetase JAR1 (A)	ko04075: Plant hormone signal transduction	jasmonic acid-amido synthetase JAR1 isoform X1 [Cucumis melo var. makuwa]	GH310_ARATH RecName: Full=Indole-3-acetic acid-amido synthetase GH3.10 {ECO:0000305}; EC=6.3.2.- {ECO:0000305}; AltName: Full=Auxin-responsive GH3-like protein 10 {ECO:0000305}; AltName: Full=Protein DWARF IN LIGHT 2 {ECO:0000303|PubMed:14581632};	A0A1S3BIL6_CUCME SubName: Full=jasmonic acid-amido synthetase JAR1 isoform X1 {ECO:0000313|RefSeq:XP_008448228.1};	--	GO:0009507,chloroplast; GO:0005737,cytoplasm; GO:0016881,acid-amino acid ligase activity; GO:0009416,response to light stimulus; GO:0003674,molecular_function; GO:0003824,catalytic activity; GO:0016874,ligase activity; GO:0016879,ligase activity, forming carbon-nitrogen bonds; GO:0008150,biological_process; GO:0009314,response to radiation; GO:0009628,response to abiotic stimulus; GO:0050896,resp…	PF03321.16:GH3 auxin-responsive promoter
80	MELO3C013562.2	71.4234	75.3007	73.9388	67.7385	66.5706	75.8239	12.566	17.5308	16.2444	31.2903	25.1424	40.3767	chr11	17628944	17651748	+	K00485 dimethylaniline monooxygenase (N-oxide forming) / hypotaurine monooxygenase [EC:1.14.13.8 1.8.1.-] | (RefSeq) probable flavin-containing monooxygenase 1 (A)	ko00430: Taurine and hypotaurine metabolism; ko01100: Metabolic pathways	probable flavin-containing monooxygenase 1 [Cucumis melo]	FMO1_ARATH RecName: Full=Probable flavin-containing monooxygenase 1; EC=1.14.13.-;	A0A1S4DX31_CUCME RecName: Full=Flavin-containing monooxygenase {ECO:0000256|RuleBase:RU361177}; EC=1.-.-.- {ECO:0000256|RuleBase:RU361177};	Flavin-containing monooxygenase	GO:0050660,flavin adenine dinucleotide binding; GO:0004499,N,N-dimethylaniline monooxygenase activity; GO:0050661,NADP binding; GO:0031543,peptidyl-proline dioxygenase activity; GO:0062047,pipecolic acid N-hydroxylase; GO:0071456,cellular response to hypoxia; GO:0042742,defense response to bacterium; GO:0050832,defense response to fungus; GO:0062034,L-pipecolic acid biosynthetic process; GO:00096…	PF00743.22:Flavin-binding monooxygenase-like
81	MELO3C013782.2	0.8602	1.0489	0.7521	1.414	1.2789	1.736	0.6455	0.4307	0.2208	0.2419	0.8077	0.6268	chr06	33393672	33398810	-	--	--	uncharacterized protein LOC103490712 isoform X1 [Cucumis melo]	LHW_ARATH RecName: Full=Transcription factor LHW; AltName: Full=BHLH transcription factor delta; Short=bHLH delta; AltName: Full=Basic helix-loop-helix protein 156; Short=AtbHLH156; Short=bHLH 156; AltName: Full=Protein LONESOME HIGHWAY; AltName: Full=bHLH transcription factor bHLH156;	A0A1S3BK12_CUCME SubName: Full=uncharacterized protein LOC103490712 {ECO:0000313|RefSeq:XP_008448575.1};	--	GO:0005634,nucleus; GO:0003677,DNA binding; GO:0003700,DNA-binding transcription factor activity; GO:0042803,protein homodimerization activity; GO:0010078,maintenance of root meristem identity; GO:0045893,positive regulation of transcription, DNA-templated; GO:0006355,regulation of transcription, DNA-templated; GO:0048364,root development; GO:0010479,stele development; GO:0010089,xylem developmen…	PF14215.9:bHLH-MYC and R2R3-MYB transcription factors N-terminal
82	MELO3C013962.2	2.5001	3.4484	3.0487	3.8888	4.0043	2.9245	1.4768	0.7118	0.6914	1.0521	0.7565	0.7308	chr06	35422727	35429401	+	K00759 adenine phosphoribosyltransferase [EC:2.4.2.7] | (RefSeq) adenine phosphoribosyltransferase 3 (A)	ko00230: Purine metabolism; ko01100: Metabolic pathways; ko01232: Nucleotide metabolism	adenine phosphoribosyltransferase 3 [Cucumis sativus]	APT3_ARATH RecName: Full=Adenine phosphoribosyltransferase 3; EC=2.4.2.7;	A0A0A0L6Y7_CUCSA RecName: Full=Adenine phosphoribosyltransferase {ECO:0000256|ARBA:ARBA00011893}; EC=2.4.2.7 {ECO:0000256|ARBA:ARBA00011893};	Adenine phosphoribosyl transferases	GO:0005829,cytosol; GO:0003999,adenine phosphoribosyltransferase activity; GO:0006168,adenine salvage; GO:0044209,AMP salvage; GO:0006166,purine ribonucleoside salvage; GO:0003674,molecular_function; GO:0003824,catalytic activity; GO:0016740,transferase activity; GO:0016757,transferase activity, transferring glycosyl groups; GO:0016763,transferase activity, transferring pentosyl groups; GO:010613…	PF00156.30:Phosphoribosyl transferase domain
83	MELO3C014007.2	50.1825	27.1382	42.2036	55.7551	61.1162	59.9179	25.1645	16.0261	18.866	21.1905	41.5252	27.1596	chr06	35812884	35816820	-	K04569 copper chaperone for superoxide dismutase | (RefSeq) copper chaperone for superoxide dismutase, chloroplastic/cytosolic (A)	--	copper chaperone for superoxide dismutase, chloroplastic/cytosolic [Cucumis melo]	CCS_ARATH RecName: Full=Copper chaperone for superoxide dismutase, chloroplastic/cytosolic; Short=AtCCS; AltName: Full=Superoxide dismutase copper chaperone; Flags: Precursor;	A0A0S2LKY4_CUCME RecName: Full=Superoxide dismutase copper chaperone {ECO:0000256|ARBA:ARBA00032899};	Copper chaperone for superoxide dismutase	GO:0009507,chloroplast; GO:0009570,chloroplast stroma; GO:0005737,cytoplasm; GO:0005829,cytosol; GO:0005507,copper ion binding; GO:0016532,superoxide dismutase copper chaperone activity; GO:0006878,cellular copper ion homeostasis; GO:0019430,removal of superoxide radicals; GO:0003674,molecular_function; GO:0005488,binding; GO:0043167,ion binding; GO:0043169,cation binding; GO:0046872,metal ion bi…	PF00080.23:Copper/zinc superoxide dismutase (SODC)
84	MELO3C014047.2	50.4959	58.8153	71.4676	31.8809	32.6591	27.5156	9.5956	10.5729	22.3972	9.4708	7.2517	1.1218	chr06	36214838	36219024	+	K15803 (-)-germacrene D synthase [EC:4.2.3.75] | (RefSeq) (-)-germacrene D synthase-like (A)	ko00909: Sesquiterpenoid and triterpenoid biosynthesis	(-)-germacrene D synthase-like isoform X2 [Cucumis melo]	TPSGD_VITVI RecName: Full=(-)-germacrene D synthase; EC=4.2.3.22; EC=4.2.3.75;	A0A1S3BLW6_CUCME SubName: Full=(-)-germacrene D synthase-like {ECO:0000313|RefSeq:XP_008448975.1};	--	GO:0005737,cytoplasm; GO:0034004,germacradienol synthase activity; GO:0052577,germacrene-D synthase activity; GO:0000287,magnesium ion binding; GO:0016102,diterpenoid biosynthetic process; GO:0003674,molecular_function; GO:0003824,catalytic activity; GO:0016829,lyase activity; GO:0016835,carbon-oxygen lyase activity; GO:0016838,carbon-oxygen lyase activity, acting on phosphates; GO:0010333,terpen…	PF03936.19:Terpene synthase family, metal binding domain
85	MELO3C014192.2	2.3541	1.7355	1.6856	1.7065	1.6006	1.677	0.133	0.2025	0.2699	0.6539	0.5111	0.4796	chr06	38182832	38187681	+	K11592 endoribonuclease Dicer [EC:3.1.26.-] | (RefSeq) endoribonuclease Dicer homolog 1 (A)	--	alpha-1,3-arabinosyltransferase XAT2-like [Cucumis melo]	RTL2_ARATH RecName: Full=Ribonuclease 3-like protein 2; EC=3.1.26.-; AltName: Full=Ribonuclease III-like protein 2; Short=RNase III-like protein 2; AltName: Full=Ribonuclease three-like protein 2;	A0A1S3BLE4_CUCME SubName: Full=uncharacterized protein LOC103491099 isoform X2 {ECO:0000313|RefSeq:XP_008449152.1};	dsRNA-specific nuclease Dicer and related ribonucleases	GO:0005737,cytoplasm; GO:0005634,nucleus; GO:0046872,metal ion binding; GO:0004525,ribonuclease III activity; GO:0003723,RNA binding; GO:0006364,rRNA processing; GO:0030422,production of siRNA involved in RNA interference; GO:0003674,molecular_function; GO:0005488,binding; GO:0043167,ion binding; GO:0043169,cation binding; GO:0003824,catalytic activity; GO:0004518,nuclease activity; GO:0004519,en…	PF04577.17:Glycosyltransferase 61
86	MELO3C014367.2	19.2496	12.6015	10.5887	34.2425	31.93	34.417	9.0965	7.2587	3.6477	12.1104	13.4775	11.6167	chr05	3222299	3223356	-	K08869 aarF domain-containing kinase | (RefSeq) uncharacterized LOC103503727 (A)	--	putative transferase [Cucumis melo var. makuwa]	--	A0A5A7TEL2_CUCME SubName: Full=Putative transferase {ECO:0000313|EMBL:KAA0039669.1};	Predicted unusual protein kinase	GO:0016740,transferase activity; GO:0003674,molecular_function; GO:0003824,catalytic activity	--
87	MELO3C014622.2	4.9996	5.2971	4.1218	21.316	22.4483	22.3068	0.9796	1.6436	2.1155	9.8212	7.4744	10.2655	chr05	882019	884515	-	K13418 somatic embryogenesis receptor kinase 1 [EC:2.7.10.1 2.7.11.1] | (RefSeq) somatic embryogenesis receptor kinase 2 (A)	--	G-type lectin S-receptor-like serine/threonine-protein kinase LECRK3 [Cucumis melo]	LERK3_ORYSI RecName: Full=G-type lectin S-receptor-like serine/threonine-protein kinase LECRK3 {ECO:0000305}; Short=OsLecRK3 {ECO:0000303|PubMed:25485617}; EC=2.7.11.1 {ECO:0000305}; AltName: Full=OsRLCK135 {ECO:0000305}; Flags: Precursor;	A0A5A7TD64_CUCME RecName: Full=Receptor-like serine/threonine-protein kinase {ECO:0000256|PIRNR:PIRNR000641}; EC=2.7.11.1 {ECO:0000256|PIRNR:PIRNR000641};	--	GO:0016021,integral component of membrane; GO:0005524,ATP binding; GO:0030246,carbohydrate binding; GO:0106310,protein serine kinase activity; GO:0004674,protein serine/threonine kinase activity; GO:0006952,defense response; GO:0006468,protein phosphorylation; GO:0000166,nucleotide binding; GO:0003674,molecular_function; GO:0005488,binding; GO:0017076,purine nucleotide binding; GO:0030554,adenyl …	PF00069.28:Protein kinase domain
88	MELO3C014625.2	5.295	9.0483	3.6512	8.6979	11.3873	8.9683	0.7115	0.4639	0.4654	4.1354	1.7167	3.9069	chr05	873672	875382	-	K13430 serine/threonine-protein kinase PBS1 [EC:2.7.11.1] | (RefSeq) serine/threonine-protein kinase PBS1 (A)	ko04626: Plant-pathogen interaction	G-type lectin S-receptor-like serine/threonine-protein kinase RLK1 [Cucumis melo var. makuwa]	LERK3_ORYSJ RecName: Full=G-type lectin S-receptor-like serine/threonine-protein kinase LECRK3 {ECO:0000305}; Short=OsLecRK3 {ECO:0000303|PubMed:25485617}; EC=2.7.11.1 {ECO:0000305}; AltName: Full=OsRLCK135 {ECO:0000303|PubMed:19825577}; Flags: Precursor;	A0A5D3B8J2_CUCME RecName: Full=Receptor-like serine/threonine-protein kinase {ECO:0000256|PIRNR:PIRNR000641}; EC=2.7.11.1 {ECO:0000256|PIRNR:PIRNR000641};	--	GO:0016021,integral component of membrane; GO:0005524,ATP binding; GO:0030246,carbohydrate binding; GO:0106310,protein serine kinase activity; GO:0004674,protein serine/threonine kinase activity; GO:0006952,defense response; GO:0006468,protein phosphorylation; GO:0000166,nucleotide binding; GO:0003674,molecular_function; GO:0005488,binding; GO:0017076,purine nucleotide binding; GO:0030554,adenyl …	PF01453.27:D-mannose binding lectin
89	MELO3C014632.2	1.1653	0.7819	0.6916	2.605	1.5523	2.2456	0	0	0	0	0	0	chr05	781860	784436	+	K00454 lipoxygenase [EC:1.13.11.12] | (RefSeq) lipoxygenase 2, chloroplastic-like (A)	ko00591: Linoleic acid metabolism; ko00592: alpha-Linolenic acid metabolism; ko01100: Metabolic pathways; ko01110: Biosynthesis of secondary metabolites	linoleate 13S-lipoxygenase 2-1, chloroplastic-like isoform X1 [Cucumis melo]	LOX2_ARATH RecName: Full=Lipoxygenase 2, chloroplastic; Short=AtLOX2; EC=1.13.11.12 {ECO:0000269|PubMed:18949503}; Flags: Precursor;	A0A5A7TI85_CUCME RecName: Full=Lipoxygenase {ECO:0000256|RuleBase:RU003975}; EC=1.13.11.- {ECO:0000256|RuleBase:RU003975};	--	GO:0009507,chloroplast; GO:0009941,chloroplast envelope; GO:0009570,chloroplast stroma; GO:0009535,chloroplast thylakoid membrane; GO:0005737,cytoplasm; GO:0005829,cytosol; GO:0016165,linoleate 13S-lipoxygenase activity; GO:0046872,metal ion binding; GO:0003729,mRNA binding; GO:0016702,oxidoreductase activity, acting on single donors with incorporation of molecular oxygen, incorporation of two at…	PF00305.22:Lipoxygenase
90	MELO3C014895.2	13.3869	10.8953	12.5968	17.9762	18.7087	18.1604	9.2798	5.9031	3.9737	8.4501	10.2256	9.2054	chr06	21725532	21727557	+	--	--	squamosa promoter-binding-like protein 13A [Cucumis melo]	SP13A_ARATH RecName: Full=Squamosa promoter-binding-like protein 13A;	A0A1S3BNK6_CUCME SubName: Full=squamosa promoter-binding-like protein 13A {ECO:0000313|RefSeq:XP_008450118.1};	--	GO:0005634,nucleus; GO:0003677,DNA binding; GO:0003700,DNA-binding transcription factor activity; GO:0046872,metal ion binding; GO:0048653,anther development; GO:0006355,regulation of transcription, DNA-templated; GO:0003674,molecular_function; GO:0003676,nucleic acid binding; GO:0005488,binding; GO:0097159,organic cyclic compound binding; GO:1901363,heterocyclic compound binding; GO:0140110,tran…	PF03110.17:SBP domain
91	MELO3C015051.2	2.4894	1.9714	1.6148	3.2744	2.2866	2.2951	0.8645	0.8333	1.007	0.6965	0.7585	0.8571	chr02	9344235	9347953	-	K09561 STIP1 homology and U-box containing protein 1 [EC:2.3.2.27] | (RefSeq) E3 ubiquitin-protein ligase CHIP (A)	ko04120: Ubiquitin mediated proteolysis; ko04141: Protein processing in endoplasmic reticulum	E3 ubiquitin-protein ligase PUB22-like [Cucumis melo]	PUB22_ARATH RecName: Full=E3 ubiquitin-protein ligase PUB22 {ECO:0000303|PubMed:11495788}; EC=2.3.2.27 {ECO:0000269|PubMed:18664614, ECO:0000269|PubMed:18771922, ECO:0000269|PubMed:23170036}; AltName: Full=Plant U-box protein 22 {ECO:0000303|PubMed:11495788}; AltName: Full=RING-type E3 ubiquitin transferase PUB22 {ECO:0000303|PubMed:11495788}; AltName: Full=U-box domain-containing protein 22 {ECO…	A0A1S3BNV9_CUCME RecName: Full=RING-type E3 ubiquitin transferase {ECO:0000256|ARBA:ARBA00012483}; EC=2.3.2.27 {ECO:0000256|ARBA:ARBA00012483};	--	GO:0005829,cytosol; GO:0061630,ubiquitin protein ligase activity; GO:0004842,ubiquitin-protein transferase activity; GO:0006952,defense response; GO:0051865,protein autoubiquitination; GO:0016567,protein ubiquitination; GO:0002679,respiratory burst involved in defense response; GO:0009414,response to water deprivation; GO:0003674,molecular_function; GO:0003824,catalytic activity; GO:0016740,trans…	PF04564.18:U-box domain
92	MELO3C015365.2	14.7309	12.0859	15.6056	16.644	14.534	12.3661	5.1415	4.9326	5.3677	7.3349	6.7126	5.236	chr02	1097182	1102187	+	--	--	uncharacterized protein LOC103492217 isoform X1 [Cucumis melo]	--	A0A1S3BQI6_CUCME SubName: Full=uncharacterized protein LOC103492217 isoform X1 {ECO:0000313|RefSeq:XP_008450721.1};	--	GO:0016020,membrane; GO:0005524,ATP binding; GO:0004176,ATP-dependent peptidase activity; GO:0004222,metalloendopeptidase activity; GO:0006508,proteolysis; GO:0000166,nucleotide binding; GO:0003674,molecular_function; GO:0005488,binding; GO:0017076,purine nucleotide binding; GO:0030554,adenyl nucleotide binding; GO:0032553,ribonucleotide binding; GO:0032555,purine ribonucleotide binding; GO:00325…	--
93	MELO3C015417.2	5.2734	4.7591	5.4843	2.7489	2.2556	1.7168	2.5879	0.7944	0.4887	0.4685	1.0084	0.155	chr02	1501268	1503099	+	K03327 multidrug resistance protein, MATE family | (RefSeq) protein DETOXIFICATION 51-like (A)	--	protein DETOXIFICATION 51-like [Cucumis melo]	DTX51_ARATH RecName: Full=Protein DETOXIFICATION 51 {ECO:0000303|PubMed:11739388}; Short=AtDTX51 {ECO:0000303|PubMed:11739388}; AltName: Full=Multidrug and toxic compound extrusion protein 51 {ECO:0000305}; Short=MATE protein 51 {ECO:0000305}; AltName: Full=Protein ABNORMAL SHOOT 3 {ECO:0000303|PubMed:26160579}; AltName: Full=Protein ACTIVATED DISEASE SUSCEPTIBILITY 1 {ECO:0000303|PubMed:21762165…	A0A1S3BQ18_CUCME RecName: Full=Protein DETOXIFICATION {ECO:0000256|RuleBase:RU004914}; AltName: Full=Multidrug and toxic compound extrusion protein {ECO:0000256|RuleBase:RU004914};	Uncharacterized membrane protein, predicted efflux pump	GO:0010008,endosome membrane; GO:0016021,integral component of membrane; GO:0005770,late endosome; GO:0031902,late endosome membrane; GO:0016020,membrane; GO:0015297,antiporter activity; GO:0022857,transmembrane transporter activity; GO:0042910,xenobiotic transmembrane transporter activity; GO:0010252,auxin homeostasis; GO:0006952,defense response; GO:0031348,negative regulation of defense respon…	PF01554.21:MatE
94	MELO3C015593.2	18.1076	16.7082	14.3667	11.5608	13.343	9.1649	10.2086	7.6185	5.2126	3.5394	7.0664	5.3377	chr02	3144460	3152648	+	K13071 pheophorbide a oxygenase [EC:1.14.15.17] | (RefSeq) pheophorbide a oxygenase, chloroplastic (A)	ko00860: Porphyrin metabolism; ko01110: Biosynthesis of secondary metabolites	protochlorophyllide-dependent translocon component 52, chloroplastic-like [Cucumis melo]	PTC52_ARATH RecName: Full=Protochlorophyllide-dependent translocon component 52, chloroplastic; AltName: Full=ACD1-like protein; AltName: Full=Protein TIC 55-IV; AltName: Full=Translocon at the inner envelope membrane of chloroplasts 55-IV; Flags: Precursor;	A0A1S3BRB5_CUCME SubName: Full=protochlorophyllide-dependent translocon component 52, chloroplastic-like {ECO:0000313|RefSeq:XP_008451032.1};	--	GO:0009941,chloroplast envelope; GO:0009706,chloroplast inner membrane; GO:0005737,cytoplasm; GO:0005829,cytosol; GO:0016021,integral component of membrane; GO:0009536,plastid; GO:0051537,2 iron, 2 sulfur cluster binding; GO:0010277,chlorophyllide a oxygenase [overall] activity; GO:0046872,metal ion binding; GO:0016491,oxidoreductase activity; GO:0015031,protein transport; GO:0003674,molecular_fu…	PF08417.15:Pheophorbide a oxygenase
95	MELO3C016566.2	54.9762	44.3592	45.0582	68.6454	79.5616	85.4587	8.702	7.6992	6.5465	13.0089	11.4676	13.1706	chr06	27299518	27300122	+	K00901 diacylglycerol kinase (ATP) [EC:2.7.1.107] | (RefSeq) diacylglycerol kinase 5-like (A)	ko00561: Glycerolipid metabolism; ko00564: Glycerophospholipid metabolism; ko01100: Metabolic pathways; ko01110: Biosynthesis of secondary metabolites; ko04070: Phosphatidylinositol signaling system	diacylglycerol kinase 5-like isoform X1 [Cucumis melo var. makuwa]	DGK5_ARATH RecName: Full=Diacylglycerol kinase 5; Short=AtDGK5; Short=DAG kinase 5; EC=2.7.1.107; AltName: Full=Diglyceride kinase 5; Short=DGK 5;	A0A5D3BUW9_CUCME RecName: Full=Diacylglycerol kinase {ECO:0000256|RuleBase:RU361128}; Short=DAG kinase {ECO:0000256|RuleBase:RU361128}; EC=2.7.1.107 {ECO:0000256|RuleBase:RU361128};	Diacylglycerol kinase	GO:0005524,ATP binding; GO:0004143,diacylglycerol kinase activity; GO:0003951,NAD+ kinase activity; GO:0006952,defense response; GO:0016310,phosphorylation; GO:0007205,protein kinase C-activating G protein-coupled receptor signaling pathway; GO:0000166,nucleotide binding; GO:0003674,molecular_function; GO:0005488,binding; GO:0017076,purine nucleotide binding; GO:0030554,adenyl nucleotide binding;…	PF00609.22:Diacylglycerol kinase accessory domain
96	MELO3C016590.2	5.5799	18.4616	11.294	7.5981	15.6319	7.262	0.1942	0	0	0	0.2025	0	chr06	26809115	26817214	-	K15803 (-)-germacrene D synthase [EC:4.2.3.75] | (RefSeq) (+)-gamma-cadinene synthase-like (A)	ko00909: Sesquiterpenoid and triterpenoid biosynthesis	(+)-gamma-cadinene synthase-like [Cucumis melo]	GCSY1_CUCME RecName: Full=(+)-gamma-cadinene synthase; Short=CmTpsNY; EC=4.2.3.13; EC=4.2.3.92; AltName: Full=(+)-delta-cadinene synthase;	A0A1S3BTM3_CUCME SubName: Full=valencene synthase-like {ECO:0000313|RefSeq:XP_008452328.1};	--	GO:0005737,cytoplasm; GO:0047461,(+)-delta-cadinene synthase activity; GO:0000287,magnesium ion binding; GO:0010334,sesquiterpene synthase activity; GO:0016102,diterpenoid biosynthetic process; GO:0045338,farnesyl diphosphate metabolic process; GO:0051762,sesquiterpene biosynthetic process; GO:0003674,molecular_function; GO:0003824,catalytic activity; GO:0010333,terpene synthase activity; GO:0016…	PF03936.19:Terpene synthase family, metal binding domain
97	MELO3C016593.2	82.8795	137.041	71.8182	44.6179	97.2786	54.6601	1.3032	1.0684	2.7313	0.9934	2.9366	0.3018	chr06	26645674	26648904	-	K15803 (-)-germacrene D synthase [EC:4.2.3.75] | (RefSeq) (+)-gamma-cadinene synthase-like (A)	ko00909: Sesquiterpenoid and triterpenoid biosynthesis	(+)-gamma-cadinene synthase-like [Cucumis melo]	GCSY1_CUCME RecName: Full=(+)-gamma-cadinene synthase; Short=CmTpsNY; EC=4.2.3.13; EC=4.2.3.92; AltName: Full=(+)-delta-cadinene synthase;	A0A1S4DZR2_CUCME SubName: Full=(+)-gamma-cadinene synthase-like {ECO:0000313|RefSeq:XP_016901220.1};	--	GO:0005737,cytoplasm; GO:0047461,(+)-delta-cadinene synthase activity; GO:0000287,magnesium ion binding; GO:0010334,sesquiterpene synthase activity; GO:0016102,diterpenoid biosynthetic process; GO:0045338,farnesyl diphosphate metabolic process; GO:0051762,sesquiterpene biosynthetic process; GO:0003674,molecular_function; GO:0003824,catalytic activity; GO:0010333,terpene synthase activity; GO:0016…	PF01397.24:Terpene synthase, N-terminal domain
98	MELO3C016830.2	49.5446	43.4503	43.0285	13.7657	16.971	13.5796	22.7512	22.7418	23.2757	7.169	6.5038	8.5459	chr07	1805375	1808845	-	K16296 serine carboxypeptidase-like clade I [EC:3.4.16.-] | (RefSeq) serine carboxypeptidase-like 13 (A)	--	serine carboxypeptidase-like 13 [Cucumis melo var. makuwa]	SCP18_ARATH RecName: Full=Serine carboxypeptidase-like 18; EC=3.4.16.-; Flags: Precursor;	A0A1S3BV62_CUCME SubName: Full=serine carboxypeptidase-like 13 {ECO:0000313|RefSeq:XP_008452663.1};	Serine carboxypeptidases (lysosomal cathepsin A)	GO:0005576,extracellular region; GO:0016747,transferase activity, transferring acyl groups other than amino-acyl groups; GO:0004185,serine-type carboxypeptidase activity; GO:0006508,proteolysis; GO:0019748,secondary metabolic process; GO:0003674,molecular_function; GO:0003824,catalytic activity; GO:0016740,transferase activity; GO:0016746,transferase activity, transferring acyl groups; GO:0004180…	PF00450.25:Serine carboxypeptidase
99	MELO3C016932.2	54.4008	40.8032	49.4131	38.1018	43.9355	39.1969	4.2155	5.0193	5.943	17.5089	12.5177	10.2321	chr07	1060826	1065979	+	--	--	uncharacterized protein E6C27_scaffold255G002740 [Cucumis melo var. makuwa]	--	A0A5A7VBE8_CUCME SubName: Full=Uncharacterized protein {ECO:0000313|EMBL:KAA0064554.1};	--	--	PF07082.14:Protein of unknown function (DUF1350)
100	MELO3C016999.2	1.52	1.2101	1.1137	37.1077	34.437	28.8367	0.6265	0.3796	0.2654	19.8427	17.7458	4.8805	chr07	526868	529174	+	K09272 FACT complex subunit SSRP1/POB3 | (RefSeq) FACT complex subunit SSRP1 (A)	--	high mobility group B protein 9 [Cucumis melo]	HMGB9_ARATH RecName: Full=High mobility group B protein 9; AltName: Full=Nucleosome/chromatin assembly factor group D 09; Short=Nucleosome/chromatin assembly factor group D 9; AltName: Full=Protein NUCLEAR FUSION DEFECTIVE 9 {ECO:0000303|PubMed:16698901};	A0A5A7VAK3_CUCME SubName: Full=High mobility group B protein 9 {ECO:0000313|EMBL:KAA0064618.1};	DNA-binding proteins Bright/BRCAA1/RBP1 and related proteins containing BRIGHT domain	GO:0005634,nucleus; GO:0003677,DNA binding; GO:0003700,DNA-binding transcription factor activity; GO:0000741,karyogamy; GO:0010197,polar nucleus fusion; GO:0006355,regulation of transcription, DNA-templated; GO:0003674,molecular_function; GO:0003676,nucleic acid binding; GO:0005488,binding; GO:0097159,organic cyclic compound binding; GO:1901363,heterocyclic compound binding; GO:0140110,transcript…	PF01388.24:ARID/BRIGHT DNA binding domain
101	MELO3C017231.2	7.6397	7.8903	6.3866	8.9476	8.8271	11.5077	4.6475	3.0128	2.4219	3.0594	4.901	3.4968	chr02	25050832	25056537	+	--	--	protein LONGIFOLIA 2 [Cucumis melo]	LNG1_ARATH RecName: Full=Protein LONGIFOLIA 1; AltName: Full=Protein TON1 RECRUITING MOTIF 2;	A0A5A7US64_CUCME SubName: Full=Protein LONGIFOLIA 2 {ECO:0000313|EMBL:KAA0058000.1};	--	GO:0005829,cytosol; GO:0005634,nucleus; GO:0051513,regulation of monopolar cell growth; GO:0009826,unidimensional cell growth; GO:0000902,cell morphogenesis; GO:0001558,regulation of cell growth; GO:0008150,biological_process; GO:0009653,anatomical structure morphogenesis; GO:0009987,cellular process; GO:0016043,cellular component organization; GO:0016049,cell growth; GO:0022603,regulation of ana…	PF14309.9:Domain of unknown function (DUF4378)
102	MELO3C017294.2	35.5893	30.3604	27.7556	40.3256	35.0305	39.5126	0.1125	0.0434	0.1334	0.3046	0.1251	0.1511	chr02	24586298	24594130	+	K12603 CCR4-NOT transcription complex subunit 6 [EC:3.1.13.4] | (RefSeq) carbon catabolite repressor protein 4 homolog 4 (A)	ko03018: RNA degradation	carbon catabolite repressor protein 4 homolog 3 [Cucumis melo]	CCR4C_ARATH RecName: Full=Carbon catabolite repressor protein 4 homolog 3; Short=CCR4 homolog 3; EC=3.1.13.4;	A0A1S4DZP0_CUCME SubName: Full=carbon catabolite repressor protein 4 homolog 3 isoform X1 {ECO:0000313|RefSeq:XP_008453379.1, ECO:0000313|RefSeq:XP_016901436.1};	Transcriptional effector CCR4-related protein	GO:0005737,cytoplasm; GO:0005634,nucleus; GO:0000175,3'-5'-exoribonuclease activity; GO:0046872,metal ion binding; GO:0004535,poly(A)-specific ribonuclease activity; GO:0003723,RNA binding; GO:0003674,molecular_function; GO:0003824,catalytic activity; GO:0004518,nuclease activity; GO:0004527,exonuclease activity; GO:0004532,exoribonuclease activity; GO:0004540,ribonuclease activity; GO:0008408,3'…	PF03372.26:Endonuclease/Exonuclease/phosphatase family
103	MELO3C017328.2	0.8251	0.727	0.9203	2.4983	4.344	3.1114	0.0235	0	0	0.0635	0	0.1891	chr02	24293576	24295251	-	--	--	stress up-regulated Nod 19 protein [Cucumis melo var. makuwa]	--	A0A5A7USG3_CUCME SubName: Full=Stress up-regulated Nod 19 protein {ECO:0000313|EMBL:KAA0058100.1};	--	--	PF07712.15:Stress up-regulated Nod 19
104	MELO3C017329.2	24.7091	21.3601	22.8873	11.2625	13.109	8.5436	7.448	7.0675	6.5791	2.1155	3.0317	2.151	chr02	24288166	24290818	-	--	--	uncharacterized protein LOC103494146 isoform X5 [Cucumis melo]	--	A0A5A7UX80_CUCME SubName: Full=Stress up-regulated Nod 19 {ECO:0000313|EMBL:KAA0058101.1};	--	--	PF07712.15:Stress up-regulated Nod 19
105	MELO3C017332.2	3.6978	4.0213	3.3758	8.7567	8.2801	8.7021	1.6262	1.2211	1.2054	4.4277	3.9437	2.9714	chr02	24256570	24259751	+	--	--	uncharacterized protein LOC103494150 [Cucumis melo]	--	A0A1S3BVP7_CUCME SubName: Full=uncharacterized protein LOC103494150 {ECO:0000313|RefSeq:XP_008453444.1};	--	--	PF07712.15:Stress up-regulated Nod 19
106	MELO3C017356.2	339.436	461.905	445.703	119.636	102.406	65.2225	19.1512	70.0641	107.886	10.4612	25.5468	6.821	chr02	24029802	24033400	+	K05929 phosphoethanolamine N-methyltransferase [EC:2.1.1.103] | (RefSeq) 7G07; phosphoethanolamine N-methyltransferase 1 (A)	ko00564: Glycerophospholipid metabolism	phosphomethylethanolamine N-methyltransferase [Cucumis melo]	PEAMT_SPIOL RecName: Full=Phosphoethanolamine N-methyltransferase; EC=2.1.1.103;	A0A1S3BWC3_CUCME SubName: Full=phosphoethanolamine N-methyltransferase 1 {ECO:0000313|RefSeq:XP_008453479.1};	SAM-dependent methyltransferases	GO:0005737,cytoplasm; GO:0000234,phosphoethanolamine N-methyltransferase activity; GO:0052667,phosphomethylethanolamine N-methyltransferase activity; GO:0032259,methylation; GO:0006656,phosphatidylcholine biosynthetic process; GO:0003674,molecular_function; GO:0003824,catalytic activity; GO:0008168,methyltransferase activity; GO:0008170,N-methyltransferase activity; GO:0008757,S-adenosylmethionin…	PF08241.15:Methyltransferase domain
107	MELO3C017580.2	2.2209	2.9706	1.8554	1.5178	1.4079	1.912	1.6119	0.6942	0.9406	0.5106	0.5603	0.4837	chr07	25311239	25315882	-	K17469 sulfate transporter 2, low-affinity | (RefSeq) low affinity sulfate transporter 3-like (A)	--	low affinity sulfate transporter 3-like [Cucumis melo]	SUT21_ARATH RecName: Full=Sulfate transporter 2.1; AltName: Full=AST68;	A0A5D3CYT2_CUCME SubName: Full=Low affinity sulfate transporter 3-like {ECO:0000313|EMBL:TYK16732.1};	Sulfate/bicarbonate/oxalate exchanger SAT-1 and related transporters (SLC26 family)	GO:0005887,integral component of plasma membrane; GO:0015301,anion:anion antiporter activity; GO:0008271,secondary active sulfate transmembrane transporter activity; GO:0015116,sulfate transmembrane transporter activity; GO:0015293,symporter activity; GO:1902358,sulfate transmembrane transport; GO:0003674,molecular_function; GO:0005215,transporter activity; GO:0008509,anion transmembrane transpor…	PF00916.23:Sulfate permease family
108	MELO3C017631.2	41.233	23.1105	31.24	8.4049	14.7987	6.4523	14.9422	7.8423	7.9154	1.853	6.2954	5.0435	chr07	25780861	25782625	-	--	--	cyclin-U4-1-like [Cucumis melo]	CCU41_ARATH RecName: Full=Cyclin-U4-1; Short=CycU4;1; AltName: Full=Cyclin-P4.1; Short=CycP4;1;	A0A1S3BYF6_CUCME RecName: Full=Cyclin {ECO:0000256|PIRNR:PIRNR027110};	Cyclin	GO:0019901,protein kinase binding; GO:0007049,cell cycle; GO:0051301,cell division; GO:0000079,regulation of cyclin-dependent protein serine/threonine kinase activity; GO:0003674,molecular_function; GO:0005488,binding; GO:0005515,protein binding; GO:0019899,enzyme binding; GO:0019900,kinase binding; GO:0008150,biological_process; GO:0009987,cellular process; GO:0001932,regulation of protein phosp…	PF08613.14:Cyclin
109	MELO3C017691.2	1.4033	1.4527	1.1305	5.0191	4.3519	5.9732	0.6224	0.2571	0.3691	2.3108	2.3244	3.6307	chr07	26431937	26433906	-	K25491 cucurbitacin acetyltransferase [EC:2.3.1.-] | (RefSeq) BAHD acyltransferase At5g47980-like (A)	ko00996: Biosynthesis of various alkaloids; ko01110: Biosynthesis of secondary metabolites	vinorine synthase-like [Cucumis melo var. makuwa]	SAT_CATRO RecName: Full=Stemmadenine O-acetyltransferase {ECO:0000303|PubMed:29511102}; Short=CrSAT {ECO:0000303|PubMed:29511102}; EC=1.7.1.- {ECO:0000269|PubMed:29511102};	A0A5A7TN59_CUCME SubName: Full=Vinorine synthase-like {ECO:0000313|EMBL:KAA0044620.1};	--	GO:0016746,transferase activity, transferring acyl groups; GO:0016491,oxidoreductase activity; GO:0009820,alkaloid metabolic process; GO:0003674,molecular_function; GO:0003824,catalytic activity; GO:0016740,transferase activity; GO:0006807,nitrogen compound metabolic process; GO:0008150,biological_process; GO:0008152,metabolic process; GO:0071704,organic substance metabolic process; GO:1901564,or…	PF02458.18:Transferase family
110	MELO3C017952.2	16.0713	15.1187	14.9112	96.2092	86.0205	72.2518	7.2774	5.6163	6.2007	41.3308	53.3669	15.5869	chr07	28267953	28269823	-	--	--	bifunctional epoxide hydrolase 2-like [Cucumis melo var. makuwa]	D14_ARATH RecName: Full=Strigolactone esterase D14 {ECO:0000303|PubMed:25425668}; EC=3.1.-.- {ECO:0000269|PubMed:25425668}; AltName: Full=Protein DWARF 14 {ECO:0000303|PubMed:22357928}; Short=AtD14 {ECO:0000303|PubMed:22357928};	A0A5D3E1N5_CUCME SubName: Full=Bifunctional epoxide hydrolase 2-like {ECO:0000313|EMBL:TYK29511.1};	Soluble epoxide hydrolase	GO:0005737,cytoplasm; GO:0005634,nucleus; GO:0016787,hydrolase activity; GO:1902348,cellular response to strigolactone; GO:0010223,secondary shoot formation; GO:1901601,strigolactone biosynthetic process; GO:0003674,molecular_function; GO:0003824,catalytic activity; GO:0008150,biological_process; GO:0009987,cellular process; GO:0010033,response to organic substance; GO:0014070,response to organic…	PF00561.23:alpha/beta hydrolase fold
111	MELO3C017975.2	1.4923	1.4093	1.1513	2.7396	2.4404	2.7684	0.6272	1.0149	0.3985	0.7883	1.0279	0.6118	chr07	28415619	28422915	-	K24810 inhibitor of Bruton tyrosine kinase | (RefSeq) uncharacterized LOC103501089 (A)	--	PH, RCC1 and FYVE domains-containing protein 1 isoform X2 [Cucumis melo]	PRAF1_ARATH RecName: Full=PH, RCC1 and FYVE domains-containing protein 1 {ECO:0000303|PubMed:11563980}; AltName: Full=Protein Praf4 {ECO:0000303|PubMed:15358268};	A0A1S3BYJ0_CUCME SubName: Full=uncharacterized protein LOC103494787 {ECO:0000313|RefSeq:XP_008454367.1};	--	GO:0005085,guanyl-nucleotide exchange factor activity; GO:0046872,metal ion binding; GO:0070300,phosphatidic acid binding; GO:0035091,phosphatidylinositol binding; GO:0003674,molecular_function; GO:0030234,enzyme regulator activity; GO:0030695,GTPase regulator activity; GO:0060589,nucleoside-triphosphatase regulator activity; GO:0098772,molecular function regulator; GO:0005488,binding; GO:0043167…	PF00415.21:Regulator of chromosome condensation (RCC1) repeat
112	MELO3C018311.2	10.0846	8.3392	5.2626	7.5957	8.3068	10.1298	0	0	0	0	0	0	chr10	20280825	20281181	+	--	--	putative leucine-rich repeat receptor-like serine/threonine-protein kinase [Cucumis melo var. makuwa]	--	A0A5A7UMQ6_CUCME SubName: Full=Putative leucine-rich repeat receptor-like serine/threonine-protein kinase {ECO:0000313|EMBL:KAA0056474.1};	--	GO:0016301,kinase activity; GO:0016310,phosphorylation; GO:0003674,molecular_function; GO:0003824,catalytic activity; GO:0016740,transferase activity; GO:0016772,transferase activity, transferring phosphorus-containing groups; GO:0006793,phosphorus metabolic process; GO:0006796,phosphate-containing compound metabolic process; GO:0008150,biological_process; GO:0008152,metabolic process; GO:0009987…	PF12819.10:Malectin-like domain
113	MELO3C018317.2	1.6858	1.4666	1.426	1.4026	1.865	1.0631	0.2864	0.276	0.6368	0	0.2896	0.0175	chr10	20018088	20020710	-	--	--	subtilisin-like protease SBT1.1 [Cucumis melo var. makuwa]	SBT11_ARATH RecName: Full=Subtilisin-like protease SBT1.1 {ECO:0000303|PubMed:16193095}; EC=3.4.21.- {ECO:0000305}; AltName: Full=Subtilase subfamily 1 member 1 {ECO:0000303|PubMed:16193095}; Short=AtSBT1.1 {ECO:0000303|PubMed:16193095}; Flags: Precursor;	A0A1S3BZC2_CUCME SubName: Full=subtilisin-like protease SBT1.1 {ECO:0000313|RefSeq:XP_008454764.1, ECO:0000313|RefSeq:XP_008454765.1};	--	GO:0031012,extracellular matrix; GO:0005576,extracellular region; GO:0004252,serine-type endopeptidase activity; GO:0006508,proteolysis; GO:0003674,molecular_function; GO:0003824,catalytic activity; GO:0004175,endopeptidase activity; GO:0008233,peptidase activity; GO:0008236,serine-type peptidase activity; GO:0016787,hydrolase activity; GO:0017171,serine hydrolase activity; GO:0140096,catalytic a…	PF00082.25:Subtilase family
114	MELO3C018423.2	193.847	194.768	246.374	3.0814	5.8644	4.3965	18.8206	34.9333	55.9585	0.4287	1.7617	0.5673	chr01	151927	153821	+	--	--	methyl jasmonate esterase 1-like [Cucumis melo]	MJE1_VITVI RecName: Full=Methyl jasmonate esterase 1 {ECO:0000303|PubMed:26934101}; Short=VvMJE1 {ECO:0000303|PubMed:26934101}; EC=3.1.1.- {ECO:0000269|PubMed:26934101}; AltName: Full=Methyl esterase 5 {ECO:0000303|PubMed:26934101}; Short=VvMES5 {ECO:0000303|PubMed:26934101}; AltName: Full=Salicylic acid-binding protein 2-4 {ECO:0000312|EMBL:RVW57636.1};	A0A1S3C0U9_CUCME SubName: Full=methylesterase 2-like {ECO:0000313|RefSeq:XP_008454899.1};	--	GO:0080030,methyl indole-3-acetate esterase activity; GO:0080032,methyl jasmonate esterase activity; GO:0080031,methyl salicylate esterase activity; GO:0009694,jasmonic acid metabolic process; GO:0031408,oxylipin biosynthetic process; GO:0009409,response to cold; GO:0010224,response to UV-B; GO:0009696,salicylic acid metabolic process; GO:0003674,molecular_function; GO:0003824,catalytic activity;…	PF12697.10:Alpha/beta hydrolase family
115	MELO3C018424.2	9.5087	8.5351	7.3012	8.6763	11.3879	9.5851	1.0962	1.0965	1.0425	1.7357	2.3294	1.2223	chr01	154431	157465	+	K05282 gibberellin-44 dioxygenase [EC:1.14.11.12] | (RefSeq) gibberellin 20 oxidase 1-like (A)	ko00904: Diterpenoid biosynthesis; ko01100: Metabolic pathways; ko01110: Biosynthesis of secondary metabolites	protein DMR6-LIKE OXYGENASE 2-like [Cucumis melo var. makuwa]	JOX2_ARATH RecName: Full=Jasmonate-induced oxygenase 2 {ECO:0000303|PubMed:28559313}; EC=1.14.11.- {ECO:0000269|PubMed:28559313, ECO:0000269|PubMed:28760569, ECO:0000269|PubMed:33516967}; AltName: Full=2-oxoglutarate-dependent dioxygenase JOX2 {ECO:0000305}; AltName: Full=Jasmonic acid oxidase 2 {ECO:0000303|PubMed:28760569};	A0A1S3BZR3_CUCME SubName: Full=LOW QUALITY PROTEIN: protein DMR6-LIKE OXYGENASE 2-like {ECO:0000313|RefSeq:XP_008454903.2};	Iron/ascorbate family oxidoreductases	GO:0005829,cytosol; GO:0051213,dioxygenase activity; GO:0005506,iron ion binding; GO:0120091,jasmonic acid hydrolase; GO:0097237,cellular response to toxic substance; GO:0006952,defense response; GO:1900366,negative regulation of defense response to insect; GO:1900150,regulation of defense response to fungus; GO:2000022,regulation of jasmonic acid mediated signaling pathway; GO:0003674,molecular_…	PF03171.23:2OG-Fe(II) oxygenase superfamily
116	MELO3C018522.2	2.2213	2.4317	2.6387	3.7874	3.4745	3.2797	0.1554	0.1498	0.1536	0.0935	0.108	0.0696	chr01	853554	858826	+	--	--	endoxylanase [Cucumis melo var. makuwa]	XYN5L_ARATH RecName: Full=Endo-1,4-beta-xylanase 5-like {ECO:0000305}; Short=AtXyn5-like {ECO:0000305}; Short=Xylan endohydrolase 5-like {ECO:0000305}; Short=Xylanase 5-like {ECO:0000305}; EC=3.2.1.8 {ECO:0000255|PROSITE-ProRule:PRU01096}; Flags: Precursor;	A0A5D3C4I2_CUCME SubName: Full=Endoxylanase {ECO:0000313|EMBL:TYK06821.1};	--	GO:0031176,endo-1,4-beta-xylanase activity; GO:0045493,xylan catabolic process; GO:0003674,molecular_function; GO:0003824,catalytic activity; GO:0004553,hydrolase activity, hydrolyzing O-glycosyl compounds; GO:0016787,hydrolase activity; GO:0016798,hydrolase activity, acting on glycosyl bonds; GO:0097599,xylanase activity; GO:0000272,polysaccharide catabolic process; GO:0005975,carbohydrate metab…	PF00331.23:Glycosyl hydrolase family 10
117	MELO3C018524.2	2.3745	2.3994	1.901	5.573	4.2513	3.205	0.8092	0.1642	0.0631	0	0.3553	0.1144	chr01	880429	882095	+	K09377 cysteine and glycine-rich protein | (RefSeq) LIM domain-containing protein WLIM1 (A)	--	LIM domain-containing protein WLIM1-like [Cucumis melo]	WLIM1_ARATH RecName: Full=LIM domain-containing protein WLIM1 {ECO:0000305}; AltName: Full=Widely-expressed LIM protein 1 {ECO:0000303|PubMed:11085265}; Short=AtWLIM1;	A0A5A7SP97_CUCME SubName: Full=LIM domain protein GLIM1a {ECO:0000313|EMBL:KAA0031371.1};	Regulatory protein MLP and related LIM proteins	GO:0005737,cytoplasm; GO:0005856,cytoskeleton; GO:0005886,plasma membrane; GO:0051015,actin filament binding; GO:0046872,metal ion binding; GO:0003729,mRNA binding; GO:0051017,actin filament bundle assembly; GO:0003674,molecular_function; GO:0003779,actin binding; GO:0005488,binding; GO:0005515,protein binding; GO:0008092,cytoskeletal protein binding; GO:0044877,protein-containing complex binding…	PF00412.25:LIM domain
118	MELO3C018555.2	1.7002	0.9207	1.968	1.8666	1.5617	1.6836	0.9911	0.4268	0.2501	0.7992	0.821	0.7364	chr01	1081997	1084757	-	K13422 transcription factor MYC2 | (RefSeq) transcription factor MYC2-like (A)	ko04016: MAPK signaling pathway - plant; ko04075: Plant hormone signal transduction	transcription factor bHLH18-like isoform X1 [Cucumis melo]	BH025_ARATH RecName: Full=Transcription factor bHLH25; AltName: Full=Basic helix-loop-helix protein 25; Short=AtbHLH25; Short=bHLH 25; AltName: Full=Transcription factor EN 29; AltName: Full=bHLH transcription factor bHLH025;	A0A1S3C1B7_CUCME SubName: Full=transcription factor bHLH18-like isoform X1 {ECO:0000313|RefSeq:XP_008455092.1};	--	GO:0005634,nucleus; GO:0003700,DNA-binding transcription factor activity; GO:0046983,protein dimerization activity; GO:0000976,transcription regulatory region sequence-specific DNA binding; GO:0006355,regulation of transcription, DNA-templated; GO:0003674,molecular_function; GO:0140110,transcription regulator activity; GO:0005488,binding; GO:0005515,protein binding; GO:0001067,regulatory region n…	PF00010.29:Helix-loop-helix DNA-binding domain
119	MELO3C018619.2	1.498	1.4121	1.0353	7.9523	6.5781	6.7473	0.4097	0.478	0.7192	2.4953	1.8588	3.2001	chr01	1534304	1556181	-	K10738 DNA helicase MCM9 [EC:5.6.2.4] | (RefSeq) probable DNA helicase MCM9 (A)	--	probable DNA helicase MCM9 isoform X1 [Cucumis melo]	MCM9_ARATH RecName: Full=Probable DNA helicase MCM9; EC=3.6.4.12; AltName: Full=Minichromosome maintenance 9; Short=AtMCM9;	A0A1S3C107_CUCME RecName: Full=DNA helicase {ECO:0000256|ARBA:ARBA00012551}; EC=3.6.4.12 {ECO:0000256|ARBA:ARBA00012551};	DNA replication licensing factor, MCM2 component	GO:0042555,MCM complex; GO:0005634,nucleus; GO:0005524,ATP binding; GO:0016887,ATPase activity; GO:0003678,DNA helicase activity; GO:0046872,metal ion binding; GO:0003697,single-stranded DNA binding; GO:0000724,double-strand break repair via homologous recombination; GO:0051321,meiotic cell cycle; GO:0000166,nucleotide binding; GO:0003674,molecular_function; GO:0005488,binding; GO:0017076,purine …	PF00493.26:MCM P-loop domain
120	MELO3C018665.2	31.3896	24.2259	33.7211	36.6817	23.5235	34.0821	6.9544	6.5963	4.9721	10.3308	8.2638	13.0668	chr01	1923844	1935013	-	K14788 ribosome biogenesis protein ENP2 | (RefSeq) nucleolar protein 10 (A)	--	uncharacterized protein LOC103495447 [Cucumis melo]	--	A0A1S3C010_CUCME SubName: Full=nucleolar protein 10 {ECO:0000313|RefSeq:XP_008455234.1};	WD40 repeat protein	GO:0005730,nucleolus; GO:0009561,megagametogenesis; GO:0007275,multicellular organism development; GO:0008150,biological_process; GO:0009553,embryo sac development; GO:0032501,multicellular organismal process; GO:0032502,developmental process; GO:0048229,gametophyte development; GO:0048856,anatomical structure development; GO:0005575,cellular_component; GO:0005622,intracellular anatomical structu…	PF08159.15:NUC153 domain
121	MELO3C018666.2	4.2566	3.4824	5.8109	4.5442	3.162	3.0576	0.3157	0.3212	0.156	0.0712	0.2438	0.0707	chr01	1936935	1940331	+	K05909 laccase [EC:1.10.3.2] | (RefSeq) laccase-14 (A)	--	laccase-14 [Cucumis melo]	LAC14_ARATH RecName: Full=Laccase-14; EC=1.10.3.2; AltName: Full=Benzenediol:oxygen oxidoreductase 14; AltName: Full=Diphenol oxidase 14; AltName: Full=Urishiol oxidase 14; Flags: Precursor;	A0A1S3C199_CUCME RecName: Full=Laccase {ECO:0000256|ARBA:ARBA00012297, ECO:0000256|RuleBase:RU361119}; EC=1.10.3.2 {ECO:0000256|ARBA:ARBA00012297, ECO:0000256|RuleBase:RU361119}; AltName: Full=Benzenediol:oxygen oxidoreductase {ECO:0000256|RuleBase:RU361119}; AltName: Full=Diphenol oxidase {ECO:0000256|RuleBase:RU361119}; AltName: Full=Urishiol oxidase {ECO:0000256|RuleBase:RU361119};	Multicopper oxidases	GO:0048046,apoplast; GO:0005507,copper ion binding; GO:0052716,hydroquinone:oxygen oxidoreductase activity; GO:0016491,oxidoreductase activity; GO:0046274,lignin catabolic process; GO:0003674,molecular_function; GO:0005488,binding; GO:0043167,ion binding; GO:0043169,cation binding; GO:0046872,metal ion binding; GO:0046914,transition metal ion binding; GO:0003824,catalytic activity; GO:0016679,oxi…	PF07731.17:Multicopper oxidase
122	MELO3C018874.2	1.3869	1.0248	0.9021	2.8003	3.1239	3.1903	0.5255	0.5065	0.1798	1.2311	1.5036	1.2488	chr01	3543128	3548828	+	K03131 transcription initiation factor TFIID subunit 6 | (RefSeq) transcription initiation factor TFIID subunit 6-like (A)	ko03022: Basal transcription factors	transcription initiation factor TFIID subunit 6-like [Cucumis melo]	TAF6_ARATH RecName: Full=Transcription initiation factor TFIID subunit 6; AltName: Full=Protein EMBRYO DEFECTIVE 2781; AltName: Full=TATA box associated factor II 59; AltName: Full=TBP-associated factor 6; Short=AtTAF6; AltName: Full=Transcription initiation factor TFIID subunit D5;	A0A1S3C124_CUCME SubName: Full=transcription initiation factor TFIID subunit 6-like {ECO:0000313|RefSeq:XP_008455502.1, ECO:0000313|RefSeq:XP_016901765.1};	Transcription initiation factor TFIID, subunit TAF6 (also component of histone acetyltransferase SAGA)	GO:0000124,SAGA complex; GO:0046695,SLIK (SAGA-like) complex; GO:0005669,transcription factor TFIID complex; GO:0046982,protein heterodimerization activity; GO:0016251,RNA polymerase II general transcription initiation factor activity; GO:0003713,transcription coactivator activity; GO:0009860,pollen tube growth; GO:0051123,RNA polymerase II preinitiation complex assembly; GO:0003674,molecular_fun…	PF02969.20:TATA box binding protein associated factor (TAF)
123	MELO3C019150.2	2.4622	1.3218	2.464	2.9036	3.8217	3.5716	0	0	0	0	0	0	chr08	14562335	14562881	-	--	--	hypothetical protein E6C27_scaffold34G00210 [Cucumis melo var. makuwa]	--	A0A5A7SJC7_CUCME SubName: Full=Uncharacterized protein {ECO:0000313|EMBL:KAA0025774.1};	--	--	--
124	MELO3C019199.2	1.746	1.6473	1.8253	2.5248	2.1727	1.899	0.7535	0.7697	0.6836	0.5937	1.2276	0.4078	chr11	8955390	8989709	-	K13436 pto-interacting protein 1 [EC:2.7.11.1] | (RefSeq) pto-interacting protein 1-like (A)	ko04626: Plant-pathogen interaction	probable receptor-like protein kinase At2g23200 [Cucumis melo]	Y2232_ARATH RecName: Full=Probable receptor-like protein kinase At2g23200; EC=2.7.11.-; Flags: Precursor;	A0A0A0LR61_CUCSA RecName: Full=Protein kinase domain-containing protein {ECO:0000259|PROSITE:PS50011};	Serine/threonine protein kinase	GO:0016021,integral component of membrane; GO:0005886,plasma membrane; GO:0005773,vacuole; GO:0005524,ATP binding; GO:0004672,protein kinase activity; GO:0004674,protein serine/threonine kinase activity; GO:0004714,transmembrane receptor protein tyrosine kinase activity; GO:0046777,protein autophosphorylation; GO:0000166,nucleotide binding; GO:0003674,molecular_function; GO:0005488,binding; GO:00…	PF00069.28:Protein kinase domain
125	MELO3C019221.2	199.038	185.071	212.966	145.797	132.22	140.738	5.5948	6.0495	9.9423	15.7277	7.667	4.6965	chr11	9473680	9477806	+	K13260 isoflavone/4'-methoxyisoflavone 2'-hydroxylase [EC:1.14.14.90 1.14.14.89] | (RefSeq) cytochrome P450 81E8 (A)	ko00943: Isoflavonoid biosynthesis; ko01100: Metabolic pathways; ko01110: Biosynthesis of secondary metabolites	cytochrome P450 81Q32-like [Cucumis melo]	CYQ32_CATRO RecName: Full=Cytochrome P450 81Q32 {ECO:0000303|PubMed:24710322}; Short=CrCYP81Q32 {ECO:0000303|PubMed:24710322}; EC=1.14.-.- {ECO:0000305};	A0A1S3C323_CUCME SubName: Full=cytochrome P450 81D1-like {ECO:0000313|RefSeq:XP_008455824.1};	Cytochrome P450 CYP2 subfamily	GO:0016021,integral component of membrane; GO:0020037,heme binding; GO:0005506,iron ion binding; GO:0004497,monooxygenase activity; GO:0016705,oxidoreductase activity, acting on paired donors, with incorporation or reduction of molecular oxygen; GO:0003674,molecular_function; GO:0005488,binding; GO:0046906,tetrapyrrole binding; GO:0097159,organic cyclic compound binding; GO:1901363,heterocyclic c…	PF00067.25:Cytochrome P450
126	MELO3C019239.2	2.3341	2.0509	1.7757	1.7761	1.96	2.2125	0.8116	0.9664	0.8139	0.2908	1.0621	0.7054	chr11	9773030	9774653	-	K00430 peroxidase [EC:1.11.1.7] | (RefSeq) peroxidase 39 (A)	ko00940: Phenylpropanoid biosynthesis; ko01100: Metabolic pathways; ko01110: Biosynthesis of secondary metabolites	peroxidase 39 [Cucumis melo]	PER39_ARATH RecName: Full=Peroxidase 39; Short=Atperox P39; EC=1.11.1.7; AltName: Full=ATP19a; Flags: Precursor;	A0A5D3BGY4_CUCME RecName: Full=Peroxidase {ECO:0000256|ARBA:ARBA00012313, ECO:0000256|RuleBase:RU362060}; EC=1.11.1.7 {ECO:0000256|ARBA:ARBA00012313, ECO:0000256|RuleBase:RU362060};	--	GO:0005576,extracellular region; GO:0009505,plant-type cell wall; GO:0099503,secretory vesicle; GO:0020037,heme binding; GO:0046872,metal ion binding; GO:0004601,peroxidase activity; GO:0042744,hydrogen peroxide catabolic process; GO:0006979,response to oxidative stress; GO:0003674,molecular_function; GO:0005488,binding; GO:0046906,tetrapyrrole binding; GO:0097159,organic cyclic compound binding;…	PF00141.26:Peroxidase
127	MELO3C019397.2	0.4739	0.6079	0.6071	0.6645	0.5559	0.6417	0.1899	0.3162	0.1792	0.1636	0.2881	0.0464	chr06	10148112	10150443	-	K22794 flavonol-3-O-glucoside/galactoside glucosyltransferase [EC:2.4.1.239 2.4.1.-] | (RefSeq) anthocyanidin 3-O-glucoside 2''-O-glucosyltransferase-like (A)	ko00944: Flavone and flavonol biosynthesis; ko01110: Biosynthesis of secondary metabolites	UDP-glycosyltransferase 79B6-like [Cucumis melo]	U79B6_ARATH RecName: Full=UDP-glycosyltransferase 79B6; EC=2.4.1.-;	A0A5A7UZ30_CUCME RecName: Full=Glycosyltransferase {ECO:0000256|RuleBase:RU362057}; EC=2.4.1.- {ECO:0000256|RuleBase:RU362057};	UDP-glucuronosyl and UDP-glucosyl transferase	GO:0035251,UDP-glucosyltransferase activity; GO:0003674,molecular_function; GO:0003824,catalytic activity; GO:0008194,UDP-glycosyltransferase activity; GO:0016740,transferase activity; GO:0016757,transferase activity, transferring glycosyl groups; GO:0016758,transferase activity, transferring hexosyl groups; GO:0046527,glucosyltransferase activity	PF00201.21:UDP-glucoronosyl and UDP-glucosyl transferase
128	MELO3C019435.2	3.0068	2.7718	1.7468	2.9389	3.9358	2.7796	1.1685	1.3042	0.7978	0.4787	1.1865	0.5369	chr06	10756525	10764487	+	K08472 mlo protein | (RefSeq) MLO-like protein 4 (A)	--	MLO-like protein 4 [Cucumis melo]	MLO4_ARATH RecName: Full=MLO-like protein 4; Short=AtMlo4;	A0A5D3CIQ4_CUCME RecName: Full=MLO-like protein {ECO:0000256|RuleBase:RU280816};	--	GO:0016021,integral component of membrane; GO:0005516,calmodulin binding; GO:0006952,defense response; GO:0009607,response to biotic stimulus; GO:0003674,molecular_function; GO:0005488,binding; GO:0005515,protein binding; GO:0006950,response to stress; GO:0008150,biological_process; GO:0050896,response to stimulus; GO:0005575,cellular_component; GO:0016020,membrane; GO:0031224,intrinsic component…	PF03094.18:Mlo family
129	MELO3C019745.2	45.4931	31.7935	37.3933	19.3862	20.0943	15.0258	1.4495	0.6727	0.7561	0.327	1.0264	0.1803	chr11	23142162	23143286	+	--	--	transcription factor TCP4-like [Cucumis melo]	TCP10_ARATH RecName: Full=Transcription factor TCP10;	A0A1S3C3A0_CUCME SubName: Full=transcription factor TCP4-like {ECO:0000313|RefSeq:XP_008456416.2};	--	GO:0005634,nucleus; GO:0003700,DNA-binding transcription factor activity; GO:0043565,sequence-specific DNA binding; GO:0048366,leaf development; GO:0010150,leaf senescence; GO:2000032,regulation of secondary shoot formation; GO:0006355,regulation of transcription, DNA-templated; GO:0003674,molecular_function; GO:0140110,transcription regulator activity; GO:0003676,nucleic acid binding; GO:0003677…	PF03634.16:TCP family transcription factor
130	MELO3C019833.2	2.9937	2.6993	2.3182	3.6579	4.6909	4.9117	0	0	0.0231	0	0	0	chr03	23248867	23250932	-	K13195 cold-inducible RNA-binding protein | (RefSeq) glycine-rich RNA-binding protein 1-like (A)	--	glycine-rich RNA-binding family protein [Cucumis melo var. makuwa]	RZ1C_ARATH RecName: Full=Glycine-rich RNA-binding protein RZ1C {ECO:0000305}; Short=AtRZ-1C {ECO:0000303|PubMed:20850334};	A0A5A7T4L2_CUCME SubName: Full=Glycine-rich RNA-binding family protein {ECO:0000313|EMBL:KAA0036507.1};	FOG: RRM domain	GO:0005730,nucleolus; GO:0005634,nucleus; GO:0005886,plasma membrane; GO:0003682,chromatin binding; GO:0031490,chromatin DNA binding; GO:0003729,mRNA binding; GO:0003676,nucleic acid binding; GO:0003723,RNA binding; GO:0008270,zinc ion binding; GO:0045892,negative regulation of transcription, DNA-templated; GO:0048026,positive regulation of mRNA splicing, via spliceosome; GO:0009409,response to c…	PF00076.25:RNA recognition motif. (a.k.a. RRM, RBD, or RNP domain)
131	MELO3C020156.2	10.1422	7.471	8.5757	5.8479	5.5154	6.5349	0.5249	0.4927	0.3891	0.3739	0.3745	0.2969	chr10	13906275	13908924	+	--	--	--	--	--	--	--	--
132	MELO3C020617.2	7.7777	6.2307	8.484	4.0093	2.8347	3.7972	1.1445	1.2305	2.7408	1.6683	0.7498	2.1876	chr12	1570346	1573007	+	K07025 putative hydrolase of the HAD superfamily | (RefSeq) uncharacterized LOC107990309 (A)	--	uncharacterized protein LOC107990309 [Cucumis melo]	--	A0A1S4E1I6_CUCME SubName: Full=LOW QUALITY PROTEIN: uncharacterized protein LOC107990309 {ECO:0000313|RefSeq:XP_016902087.1};	Haloacid dehalogenase-like hydrolase	--	PF13419.9:Haloacid dehalogenase-like hydrolase
133	MELO3C020676.2	3.1329	3.3926	2.1507	29.6493	32.7734	20.957	0.6298	1.3658	1.0503	12.5516	13.4084	11.1652	chr12	2449042	2452741	+	K19747 BAHD acyltransferase [EC:2.3.1.-] | (RefSeq) BAHD acyltransferase DCR (A)	--	phenolic glucoside malonyltransferase 2-like [Cucumis melo]	PMAT1_ARATH RecName: Full=Phenolic glucoside malonyltransferase 1; EC=2.3.1.- {ECO:0000269|PubMed:20626660}; EC=2.3.1.116 {ECO:0000269|PubMed:20626660};	A0A0A0LXY8_CUCSA SubName: Full=Uncharacterized protein {ECO:0000313|EMBL:KGN65692.1};	--	GO:0047165,flavonol-3-O-beta-glucoside O-malonyltransferase activity; GO:0050736,O-malonyltransferase activity; GO:0009636,response to toxic substance; GO:0003674,molecular_function; GO:0003824,catalytic activity; GO:0008374,O-acyltransferase activity; GO:0016420,malonyltransferase activity; GO:0016740,transferase activity; GO:0016746,transferase activity, transferring acyl groups; GO:0016747,tra…	PF02458.18:Transferase family
134	MELO3C021005.2	31.6755	22.008	23.8529	34.7417	31.3855	41.9131	0	0	0.0745	0	0.0699	0	chr01	25450021	25452073	+	K03152 protein deglycase [EC:3.5.1.124] | (RefSeq) protein DJ-1 homolog A-like (A)	--	protein DJ-1-like protein B-like [Cucumis melo var. makuwa]	DJ1B_ARATH RecName: Full=Protein DJ-1 homolog B; Short=AtDJ1B; Flags: Precursor;	A0A5D3DTH0_CUCME SubName: Full=Protein DJ-1-like protein B-like {ECO:0000313|EMBL:TYK26792.1};	Putative transcriptional regulator DJ-1	GO:0009507,chloroplast; GO:0009570,chloroplast stroma; GO:0005737,cytoplasm; GO:0019172,glyoxalase III activity; GO:1903189,glyoxal metabolic process; GO:0003674,molecular_function; GO:0003824,catalytic activity; GO:0016829,lyase activity; GO:0016835,carbon-oxygen lyase activity; GO:0016836,hydro-lyase activity; GO:0006081,cellular aldehyde metabolic process; GO:0008150,biological_process; GO:000…	PF01965.27:DJ-1/PfpI family
135	MELO3C021085.2	4.4237	3.9965	2.282	0.6887	0.7099	0.7126	0.8628	0.4805	0.6822	0.1817	0.0533	0.0773	chr01	27209846	27214158	-	--	--	membrane protein of ER body-like protein [Cucumis melo var. makuwa]	MEBL_ARATH RecName: Full=Membrane protein of ER body-like protein;	A0A5D3CJ51_CUCME SubName: Full=Membrane protein of ER body-like protein {ECO:0000313|EMBL:TYK11595.1};	--	GO:0005789,endoplasmic reticulum membrane; GO:0010168,ER body; GO:0016021,integral component of membrane; GO:0016020,membrane; GO:0005886,plasma membrane; GO:0005381,iron ion transmembrane transporter activity; GO:0005384,manganese ion transmembrane transporter activity; GO:0030026,cellular manganese ion homeostasis; GO:0006880,intracellular sequestering of iron ion; GO:0003674,molecular_function…	PF01988.22:VIT family
136	MELO3C021671.2	1.1269	1.2834	0.8025	0.8563	0.7506	1.3515	0.2225	0.2043	0.3142	0.2295	0.3167	0.1281	chr12	15358916	15367099	+	--	--	BTB/POZ domain-containing protein [Cucumis melo var. makuwa]	Y5780_ARATH RecName: Full=BTB/POZ domain-containing protein At5g47800;	A0A1S4E2B5_CUCME SubName: Full=LOW QUALITY PROTEIN: BTB/POZ domain-containing protein At5g47800-like {ECO:0000313|RefSeq:XP_016902367.1};	--	GO:0016567,protein ubiquitination; GO:0006464,cellular protein modification process; GO:0006807,nitrogen compound metabolic process; GO:0008150,biological_process; GO:0008152,metabolic process; GO:0009987,cellular process; GO:0019538,protein metabolic process; GO:0032446,protein modification by small protein conjugation; GO:0036211,protein modification process; GO:0043170,macromolecule metabolic …	PF03000.17:NPH3 family
137	MELO3C021744.2	14.5712	14.27	12.215	57.1798	54.7641	56.0437	8.5937	6.0719	5.2493	33.4233	23.4924	20.8581	chr12	16466233	16473835	-	--	--	pentatricopeptide repeat-containing protein At2g35130 [Cucumis melo]	PP186_ARATH RecName: Full=Pentatricopeptide repeat-containing protein At2g35130;	A0A1S3CAG0_CUCME SubName: Full=pentatricopeptide repeat-containing protein At2g35130 {ECO:0000313|RefSeq:XP_008459028.1};	FOG: PPR repeat	--	PF01535.23:PPR repeat
138	MELO3C021831.2	3.7266	3.7082	3.8981	1.5706	2.3898	2.0334	0.4117	0.6997	0.6907	0.5426	0.6102	0.8441	chr11	6912734	6915988	-	--	--	FOM-2 [Cucumis melo]	RGA1_SOLBU RecName: Full=Putative disease resistance protein RGA1; AltName: Full=RGA3-blb;	A0A1S3C9H9_CUCME SubName: Full=putative disease resistance protein RGA3 {ECO:0000313|RefSeq:XP_008459150.1};	Apoptotic ATPase	GO:0043531,ADP binding; GO:0005524,ATP binding; GO:0050832,defense response to fungus; GO:0000166,nucleotide binding; GO:0003674,molecular_function; GO:0005488,binding; GO:0017076,purine nucleotide binding; GO:0030554,adenyl nucleotide binding; GO:0032553,ribonucleotide binding; GO:0032555,purine ribonucleotide binding; GO:0032559,adenyl ribonucleotide binding; GO:0036094,small molecule binding; …	PF00931.25:NB-ARC domain
139	MELO3C021843.2	27.8437	24.5608	29.4827	46.0305	44.6929	40.6259	16.8191	10.4439	14.0985	3.905	3.551	2.9565	chr11	6824558	6826093	-	K24184 cytochrome P450 family 89 subfamily A [EC:1.14.-.-] | (RefSeq) cytochrome P450 89A2-like (A)	--	cytochrome P450 89A2 [Cucumis melo var. makuwa]	C89A2_ARATH RecName: Full=Cytochrome P450 89A2; EC=1.14.-.-; AltName: Full=ATH 6-1; AltName: Full=CYPLXXXIX;	A0A5A7TLX8_CUCME SubName: Full=Cytochrome P450 89A2 {ECO:0000313|EMBL:KAA0043016.1};	Cytochrome P450 CYP2 subfamily	GO:0016021,integral component of membrane; GO:0016020,membrane; GO:0020037,heme binding; GO:0005506,iron ion binding; GO:0016709,oxidoreductase activity, acting on paired donors, with incorporation or reduction of molecular oxygen, NAD(P)H as one donor, and incorporation of one atom of oxygen; GO:0003674,molecular_function; GO:0005488,binding; GO:0046906,tetrapyrrole binding; GO:0097159,organic c…	PF00067.25:Cytochrome P450
140	MELO3C021844.2	1.1427	0.9828	1.0582	1.8175	1.532	1.4554	0.1269	0.1223	0.1881	0.0859	0	0	chr11	6819230	6822432	+	K24184 cytochrome P450 family 89 subfamily A [EC:1.14.-.-] | (RefSeq) cytochrome P450 89A2-like (A)	--	cytochrome P450 89A2-like [Cucumis melo var. makuwa]	C89A2_ARATH RecName: Full=Cytochrome P450 89A2; EC=1.14.-.-; AltName: Full=ATH 6-1; AltName: Full=CYPLXXXIX;	A0A5A7TNM2_CUCME SubName: Full=Cytochrome P450 89A2-like {ECO:0000313|EMBL:KAA0043015.1};	Cytochrome P450 CYP2 subfamily	GO:0016021,integral component of membrane; GO:0016020,membrane; GO:0020037,heme binding; GO:0005506,iron ion binding; GO:0016709,oxidoreductase activity, acting on paired donors, with incorporation or reduction of molecular oxygen, NAD(P)H as one donor, and incorporation of one atom of oxygen; GO:0003674,molecular_function; GO:0005488,binding; GO:0046906,tetrapyrrole binding; GO:0097159,organic c…	PF00067.25:Cytochrome P450
141	MELO3C021867.2	6.2319	4.3636	5.4594	3.1908	3.2668	2.9934	0.1309	0.3786	0.4528	1.1518	0.4551	1.2015	chr11	6254929	6256312	-	K00913 inositol-1,3,4-trisphosphate 5/6-kinase / inositol-tetrakisphosphate 1-kinase [EC:2.7.1.159 2.7.1.134] | (RefSeq) inositol-tetrakisphosphate 1-kinase 1-like (A)	ko00562: Inositol phosphate metabolism; ko01100: Metabolic pathways; ko04070: Phosphatidylinositol signaling system	inositol-tetrakisphosphate 1-kinase 1-like [Cucumis melo]	ITPK1_ARATH RecName: Full=Inositol-tetrakisphosphate 1-kinase 1; EC=2.7.1.134 {ECO:0000305}; AltName: Full=Inositol 1,3,4-trisphosphate 5/6-kinase 1; Short=AtItpk-1; Short=Inositol-triphosphate 5/6-kinase 1; Short=Ins(1,3,4)P(3) 5/6-kinase 1; EC=2.7.1.159 {ECO:0000269|PubMed:9126335};	A0A5A7TY89_CUCME RecName: Full=Inositol-tetrakisphosphate 1-kinase {ECO:0000256|PIRNR:PIRNR038186}; EC=2.7.1.134 {ECO:0000256|PIRNR:PIRNR038186};	--	GO:0005524,ATP binding; GO:0047325,inositol tetrakisphosphate 1-kinase activity; GO:0052726,inositol-1,3,4-trisphosphate 5-kinase activity; GO:0052725,inositol-1,3,4-trisphosphate 6-kinase activity; GO:0000287,magnesium ion binding; GO:0052746,inositol phosphorylation; GO:0032957,inositol trisphosphate metabolic process; GO:0010264,myo-inositol hexakisphosphate biosynthetic process; GO:0000166,nu…	PF05770.14:Inositol 1,3,4-trisphosphate 5/6-kinase ATP-grasp domain
142	MELO3C022148.2	2.2079	2.1647	2.3332	2.0476	1.8256	2.3993	0.3601	0.2694	0.478	0.371	0.3736	0.6713	chr09	732105	742480	-	--	--	TMV resistance protein N-like isoform X1 [Cucumis melo]	TMVRN_NICGU RecName: Full=TMV resistance protein N; EC=3.2.2.6 {ECO:0000255|PROSITE-ProRule:PRU00204};	A0A1S3CAF1_CUCME SubName: Full=LOW QUALITY PROTEIN: TMV resistance protein N-like {ECO:0000313|RefSeq:XP_008459548.2};	--	GO:0005737,cytoplasm; GO:0043531,ADP binding; GO:0005524,ATP binding; GO:0050135,NAD(P)+ nucleosidase activity; GO:0061809,NAD+ nucleotidase, cyclic ADP-ribose generating; GO:0050832,defense response to fungus; GO:0009626,plant-type hypersensitive response; GO:0007165,signal transduction; GO:0000166,nucleotide binding; GO:0003674,molecular_function; GO:0005488,binding; GO:0017076,purine nucleotid…	PF00931.25:NB-ARC domain
143	MELO3C022240.2	7.1867	4.2063	5.3297	8.8331	8.7481	10.1825	0	0	0	0	0	0	chr11	32051927	32055026	+	K13117 ATP-dependent RNA helicase DDX35 [EC:3.6.4.13] | (RefSeq) probable pre-mRNA-splicing factor ATP-dependent RNA helicase DEAH9 (A)	--	probable pre-mRNA-splicing factor ATP-dependent RNA helicase DEAH9 isoform X2 [Cucumis melo]	DEAH9_ARATH RecName: Full=Probable pre-mRNA-splicing factor ATP-dependent RNA helicase DEAH9 {ECO:0000305}; EC=3.6.4.13; AltName: Full=DEAH RNA helicase homolog DDX35 {ECO:0000305};	A0A1S4E2L5_CUCME SubName: Full=putative pre-mRNA-splicing factor ATP-dependent RNA helicase C20H4.09 {ECO:0000313|RefSeq:XP_016902463.1, ECO:0000313|RefSeq:XP_016902464.1};	DEAH-box RNA helicase	GO:0005829,cytosol; GO:0009506,plasmodesma; GO:0005681,spliceosomal complex; GO:0005524,ATP binding; GO:0016887,ATPase activity; GO:0003723,RNA binding; GO:0003724,RNA helicase activity; GO:0006397,mRNA processing; GO:0008380,RNA splicing; GO:0000166,nucleotide binding; GO:0003674,molecular_function; GO:0005488,binding; GO:0017076,purine nucleotide binding; GO:0030554,adenyl nucleotide binding; G…	--
144	MELO3C022257.2	4.8229	4.8396	4.5537	6.5454	5.9791	6.896	0	0.2007	0	0.1879	0.3137	0.1865	chr11	32241869	32243664	+	--	--	immune-associated nucleotide-binding protein 9-like [Cucumis melo]	IAN9_ARATH RecName: Full=Immune-associated nucleotide-binding protein 9 {ECO:0000303|PubMed:17723251}; Short=AtIAN9 {ECO:0000303|PubMed:17723251}; AltName: Full=AIG1-like protein {ECO:0000305};	A0A0A0KA09_CUCSA RecName: Full=AIG1-type G domain-containing protein {ECO:0000259|PROSITE:PS51720};	--	GO:0005525,GTP binding; GO:1900425,negative regulation of defense response to bacterium; GO:0000166,nucleotide binding; GO:0001882,nucleoside binding; GO:0001883,purine nucleoside binding; GO:0003674,molecular_function; GO:0005488,binding; GO:0017076,purine nucleotide binding; GO:0019001,guanyl nucleotide binding; GO:0032549,ribonucleoside binding; GO:0032550,purine ribonucleoside binding; GO:003…	PF04548.19:AIG1 family
145	MELO3C022437.2	3.6979	6.4248	1.984	5.9438	4.1761	3.9647	0.1789	0	0.053	0.1695	0.0124	0.0961	chr11	33687160	33688847	+	--	--	uncharacterized protein LOC103498965 [Cucumis melo]	--	A0A1S4E3C5_CUCME SubName: Full=uncharacterized protein LOC103498965 {ECO:0000313|RefSeq:XP_016902480.1};	--	GO:0005576,extracellular region; GO:0005575,cellular_component; GO:0110165,cellular anatomical entity	PF07468.14:Agglutinin domain
146	MELO3C022513.2	6.399	7.0883	8.5288	7.1779	7.7212	5.651	5.5066	2.7965	2.5017	2.1638	3.6842	1.7098	chr11	34247271	34248290	-	K14493 gibberellin receptor GID1 [EC:3.-.-.-] | (RefSeq) gibberellin receptor GID1C (A)	ko04075: Plant hormone signal transduction	probable carboxylesterase 9 [Cucumis melo]	CXE9_ARATH RecName: Full=Probable carboxylesterase 9; AltName: Full=AtCXE9; EC=3.1.1.1;	A0A5D3DMJ5_CUCME SubName: Full=Putative carboxylesterase 9 {ECO:0000313|EMBL:TYK24490.1};	Arylacetamide deacetylase	GO:0080030,methyl indole-3-acetate esterase activity; GO:0003674,molecular_function; GO:0003824,catalytic activity; GO:0016787,hydrolase activity; GO:0016788,hydrolase activity, acting on ester bonds; GO:0052689,carboxylic ester hydrolase activity	PF07859.16:alpha/beta hydrolase fold
147	MELO3C022693.2	2.4345	1.3695	2.0617	5.0235	4.2311	5.6195	0.2103	0.1773	0.2727	0.2846	0.4385	0.353	chr04	19934407	19936729	-	--	--	GDSL esterase/lipase 5 [Cucumis melo var. makuwa]	GLIP5_ARATH RecName: Full=GDSL esterase/lipase 5; EC=3.1.1.-; AltName: Full=Extracellular lipase 5; Flags: Precursor;	A0A5D3D6J2_CUCME SubName: Full=GDSL esterase/lipase 5 {ECO:0000313|EMBL:TYK19142.1};	--	GO:0005576,extracellular region; GO:0016298,lipase activity; GO:0016042,lipid catabolic process; GO:0003674,molecular_function; GO:0003824,catalytic activity; GO:0016787,hydrolase activity; GO:0016788,hydrolase activity, acting on ester bonds; GO:0006629,lipid metabolic process; GO:0008150,biological_process; GO:0008152,metabolic process; GO:0009056,catabolic process; GO:0044238,primary metabolic…	PF00657.25:GDSL-like Lipase/Acylhydrolase
148	MELO3C022736.2	0.6344	0.8384	0.5612	0.2777	0.726	0.8774	0.0722	0.0522	0.0535	0.1709	0.1505	0.1696	chr04	20771089	20773983	-	K13691 pathogen-inducible salicylic acid glucosyltransferase [EC:2.4.1.-] | (RefSeq) UDP-glycosyltransferase 74F1-like (A)	--	UDP-glycosyltransferase 74F1-like [Cucumis melo var. makuwa]	U74F1_ARATH RecName: Full=Flavonol 7-O-beta-glucosyltransferase UGT74F1 {ECO:0000305}; EC=2.4.1.237 {ECO:0000269|PubMed:15352060}; AltName: Full=UDP-glycosyltransferase 74F1 {ECO:0000303|PubMed:11042215};	A0A1S4E2T3_CUCME RecName: Full=Glycosyltransferase {ECO:0000256|RuleBase:RU362057}; EC=2.4.1.- {ECO:0000256|RuleBase:RU362057};	UDP-glucuronosyl and UDP-glucosyl transferase	GO:0033836,flavonol 7-O-beta-glucosyltransferase activity; GO:0080043,quercetin 3-O-glucosyltransferase activity; GO:0080044,quercetin 7-O-glucosyltransferase activity; GO:0003674,molecular_function; GO:0003824,catalytic activity; GO:0016740,transferase activity; GO:0016757,transferase activity, transferring glycosyl groups; GO:0016758,transferase activity, transferring hexosyl groups; GO:0046527…	PF00201.21:UDP-glucoronosyl and UDP-glucosyl transferase
149	MELO3C022991.2	278.324	381.175	317.208	326.206	393.783	545.686	0.1258	0.1213	0.1865	0	0	0	chr05	5693909	5694148	+	--	--	hypothetical protein E6C27_scaffold90G001240 [Cucumis melo var. makuwa]	--	A0A5A7VBT9_CUCME SubName: Full=Uncharacterized protein {ECO:0000313|EMBL:KAA0065663.1};	--	--	--
150	MELO3C023284.2	2.7963	2.3532	1.3228	2.4571	2.6571	2.7581	0.3056	0.3732	0.5135	0.1931	0.34	0.0547	chr11	850384	855616	+	K12742 isoprene synthase [EC:4.2.3.27] | (RefSeq) myrcene synthase, chloroplastic-like (A)	ko00900: Terpenoid backbone biosynthesis; ko01110: Biosynthesis of secondary metabolites	myrcene synthase, chloroplastic-like isoform X1 [Cucumis melo]	MYRS_QUEIL RecName: Full=Myrcene synthase, chloroplastic; EC=4.2.3.15; Flags: Precursor;	A0A1S3CDT6_CUCME SubName: Full=terpene synthase 10-like {ECO:0000313|RefSeq:XP_008461029.1};	--	GO:0009507,chloroplast; GO:0000287,magnesium ion binding; GO:0050551,myrcene synthase activity; GO:0016102,diterpenoid biosynthetic process; GO:0003674,molecular_function; GO:0005488,binding; GO:0043167,ion binding; GO:0043169,cation binding; GO:0046872,metal ion binding; GO:0003824,catalytic activity; GO:0010333,terpene synthase activity; GO:0016829,lyase activity; GO:0016835,carbon-oxygen lyase…	PF03936.19:Terpene synthase family, metal binding domain
151	MELO3C023378.2	26.4457	29.2278	9.7511	9.558	15.8758	7.6016	7.1659	3.9077	3.3137	3.9449	7.3585	3.4436	chr01	34777271	34778731	-	K04124 gibberellin 3beta-dioxygenase [EC:1.14.11.15] | (RefSeq) gibberellin 3-beta-dioxygenase 1-like (A)	ko00904: Diterpenoid biosynthesis; ko01100: Metabolic pathways; ko01110: Biosynthesis of secondary metabolites	gibberellin 3-beta-dioxygenase 1-like [Cucumis melo]	G3OX_PEA RecName: Full=Gibberellin 3-beta-dioxygenase 1; EC=1.14.11.15; AltName: Full=GA 3-oxidase 1; AltName: Full=Gibberellin 3 beta-hydroxylase 1;	A0A1S3CDD3_CUCME SubName: Full=gibberellin 3-beta-dioxygenase 1-like {ECO:0000313|RefSeq:XP_008461056.1};	Iron/ascorbate family oxidoreductases	GO:0016707,gibberellin 3-beta-dioxygenase activity; GO:0046872,metal ion binding; GO:0009686,gibberellin biosynthetic process; GO:0003674,molecular_function; GO:0003824,catalytic activity; GO:0016491,oxidoreductase activity; GO:0016705,oxidoreductase activity, acting on paired donors, with incorporation or reduction of molecular oxygen; GO:0016706,2-oxoglutarate-dependent dioxygenase activity; GO…	PF03171.23:2OG-Fe(II) oxygenase superfamily
152	MELO3C023381.2	7.1645	7.9855	5.8199	3.1497	2.0783	2.6132	0.2025	0.1952	0.1501	0	0.0528	0.068	chr01	34766199	34770600	+	K05282 gibberellin-44 dioxygenase [EC:1.14.11.12] | (RefSeq) gibberellin 20 oxidase 1-like (A)	ko00904: Diterpenoid biosynthesis; ko01100: Metabolic pathways; ko01110: Biosynthesis of secondary metabolites	probable inactive 2-oxoglutarate-dependent dioxygenase AOP2 [Cucumis melo]	AOP1L_ARATH RecName: Full=Probable 2-oxoglutarate-dependent dioxygenase AOP1.2; EC=1.14.11.-;	A0A1S3CDV1_CUCME SubName: Full=probable inactive 2-oxoglutarate-dependent dioxygenase AOP2 isoform X2 {ECO:0000313|RefSeq:XP_008461058.1};	Iron/ascorbate family oxidoreductases	GO:0051213,dioxygenase activity; GO:0046872,metal ion binding; GO:0003674,molecular_function; GO:0003824,catalytic activity; GO:0016491,oxidoreductase activity; GO:0005488,binding; GO:0043167,ion binding; GO:0043169,cation binding	PF03171.23:2OG-Fe(II) oxygenase superfamily
153	MELO3C023394.2	16.1785	12.9735	14.0234	1.2399	1.2731	1.223	5.5211	6.9026	4.8414	0.6938	0.6109	0.4917	chr01	34691806	34697793	-	K02295 cryptochrome | (RefSeq) (6-4)DNA photolyase (A)	--	(6-4)DNA photolyase isoform X1 [Cucumis melo]	UVR3_ARATH RecName: Full=(6-4)DNA photolyase; EC=4.1.99.13; AltName: Full=Protein UV repair defective 3;	A0A1S3CDW6_CUCME SubName: Full=(6-4)DNA photolyase isoform X1 {ECO:0000313|RefSeq:XP_008461072.1};	Deoxyribodipyrimidine photolyase/cryptochrome	GO:0005737,cytoplasm; GO:0005634,nucleus; GO:0003904,deoxyribodipyrimidine photo-lyase activity; GO:0003914,DNA (6-4) photolyase activity; GO:0003677,DNA binding; GO:0071949,FAD binding; GO:0032922,circadian regulation of gene expression; GO:0043153,entrainment of circadian clock by photoperiod; GO:0006290,pyrimidine dimer repair; GO:0009411,response to UV; GO:0003674,molecular_function; GO:00038…	PF03441.17:FAD binding domain of DNA photolyase
154	MELO3C024236.2	0.6809	0.6767	0.4379	4.1405	4.8598	6.7625	0.0104	0	0	0.1555	0.0145	0.1824	chr01	35436620	35446985	-	K13430 serine/threonine-protein kinase PBS1 [EC:2.7.11.1] | (RefSeq) serine/threonine-protein kinase PBS1 (A)	ko04626: Plant-pathogen interaction	uncharacterized protein LOC103500578 [Cucumis melo]	Y1675_ARATH RecName: Full=G-type lectin S-receptor-like serine/threonine-protein kinase At1g67520; EC=2.7.11.1; Flags: Precursor;	A0A1S4E4E3_CUCME RecName: Full=Receptor-like serine/threonine-protein kinase {ECO:0000256|PIRNR:PIRNR000641}; EC=2.7.11.1 {ECO:0000256|PIRNR:PIRNR000641};	--	GO:0016021,integral component of membrane; GO:0005886,plasma membrane; GO:0005524,ATP binding; GO:0005516,calmodulin binding; GO:0030246,carbohydrate binding; GO:0106310,protein serine kinase activity; GO:0004674,protein serine/threonine kinase activity; GO:0045087,innate immune response; GO:0006468,protein phosphorylation; GO:0000166,nucleotide binding; GO:0003674,molecular_function; GO:0005488,…	PF07714.20:Protein tyrosine and serine/threonine kinase
155	MELO3C024271.2	1.0677	0.7629	0.3585	8.7678	11.1332	10.5769	0	0.0111	0	0	0.0641	0	chr01	35622930	35630922	+	K15820 isomultiflorenol synthase [EC:5.4.99.36] | (RefSeq) isomultiflorenol synthase (A)	ko00909: Sesquiterpenoid and triterpenoid biosynthesis	isomultiflorenol synthase [Cucumis melo]	IMFS_LUFAE RecName: Full=Isomultiflorenol synthase; Short=LcIMS1; EC=5.4.99.36;	A0A1S3CGE8_CUCME RecName: Full=Terpene cyclase/mutase family member {ECO:0000256|RuleBase:RU362003}; EC=5.4.99.- {ECO:0000256|RuleBase:RU362003};	Oxidosqualene-lanosterol cyclase and related proteins	GO:0005811,lipid droplet; GO:0031559,oxidosqualene cyclase activity; GO:0016104,triterpenoid biosynthetic process; GO:0003674,molecular_function; GO:0003824,catalytic activity; GO:0016853,isomerase activity; GO:0016866,intramolecular transferase activity; GO:0006629,lipid metabolic process; GO:0006720,isoprenoid metabolic process; GO:0006721,terpenoid metabolic process; GO:0006722,triterpenoid me…	PF13243.9:Squalene-hopene cyclase C-terminal domain
156	MELO3C024324.2	65.2374	32.8564	40.9726	66.0988	48.654	43.4029	16.2193	12.6834	17.3637	18.4628	22.0493	12.106	chr01	36025204	36028057	+	K09523 DnaJ homolog subfamily C member 3 | (RefSeq) dnaJ protein P58IPK homolog (A)	ko04141: Protein processing in endoplasmic reticulum	uncharacterized protein LOC103500662 isoform X1 [Cucumis melo]	DJC16_ORYSJ RecName: Full=DnaJ protein P58IPK homolog A {ECO:0000305}; Short=OsP58A {ECO:0000303|PubMed:24153418}; AltName: Full=Chaperone protein dnaJ C16 {ECO:0000305}; Short=OsDjC16 {ECO:0000303|PubMed:23160806}; Flags: Precursor;	A0A0A0K7N3_CUCSA RecName: Full=J domain-containing protein {ECO:0000259|PROSITE:PS50076};	Molecular chaperone (DnaJ superfamily)	GO:0005788,endoplasmic reticulum lumen; GO:0005575,cellular_component; GO:0005622,intracellular anatomical structure; GO:0005737,cytoplasm; GO:0005783,endoplasmic reticulum; GO:0012505,endomembrane system; GO:0031974,membrane-enclosed lumen; GO:0043226,organelle; GO:0043227,membrane-bounded organelle; GO:0043229,intracellular organelle; GO:0043231,intracellular membrane-bounded organelle; GO:0043…	PF00226.34:DnaJ domain
157	MELO3C024445.2	10.5496	5.2931	8.922	4.0457	2.8771	4.0518	4.8621	1.4439	1.4805	2.7035	1.3704	0.8472	chr01	36912576	36913724	+	--	--	hypothetical protein Csa_016674 [Cucumis sativus]	--	A0A1S3CGX8_CUCME SubName: Full=uncharacterized protein LOC103500786 {ECO:0000313|RefSeq:XP_008462438.1};	--	--	PF07911.16:Protein of unknown function (DUF1677)
158	MELO3C024486.2	16.4808	15.9454	10.6246	10.8022	15.4368	11.9974	4.1067	4.2126	3.4071	1.0199	2.0562	0.9109	chr08	10071003	10075833	+	K01915 glutamine synthetase [EC:6.3.1.2] | (RefSeq) type-1 glutamine synthetase 1-like (A)	ko00220: Arginine biosynthesis; ko00250: Alanine, aspartate and glutamate metabolism; ko00630: Glyoxylate and dicarboxylate metabolism; ko00910: Nitrogen metabolism; ko01100: Metabolic pathways; ko01230: Biosynthesis of amino acids	uncharacterized protein LOC103500842 [Cucumis melo]	GLNA_PINSY RecName: Full=Glutamine synthetase cytosolic isozyme; EC=6.3.1.2; AltName: Full=GS1; AltName: Full=Glutamate--ammonia ligase;	A0A1S3CIM4_CUCME SubName: Full=type-1 glutamine synthetase 1-like {ECO:0000313|RefSeq:XP_008462507.1};	Glutamine synthetase	GO:0005737,cytoplasm; GO:0005524,ATP binding; GO:0004356,glutamate-ammonia ligase activity; GO:0006542,glutamine biosynthetic process; GO:0000166,nucleotide binding; GO:0003674,molecular_function; GO:0005488,binding; GO:0017076,purine nucleotide binding; GO:0030554,adenyl nucleotide binding; GO:0032553,ribonucleotide binding; GO:0032555,purine ribonucleotide binding; GO:0032559,adenyl ribonucleot…	PF00120.27:Glutamine synthetase, catalytic domain
159	MELO3C024530.2	12.8468	12.817	11.4251	5.2998	6.8569	5.726	4.1598	3.7085	2.5888	1.96	1.9839	1.2966	chr08	9536507	9541218	+	--	--	subtilisin-like protease SBT4.15 [Cucumis melo]	SBT4F_ARATH RecName: Full=Subtilisin-like protease SBT4.15 {ECO:0000303|PubMed:16193095}; EC=3.4.21.- {ECO:0000255|PROSITE-ProRule:PRU10082}; AltName: Full=Subtilase subfamily 4 member 15 {ECO:0000303|PubMed:16193095}; Short=AtSBT4.15 {ECO:0000303|PubMed:16193095}; Flags: Precursor;	A0A1S4E3S0_CUCME SubName: Full=subtilisin-like protease SBT4.15 {ECO:0000313|RefSeq:XP_016902874.1};	--	GO:0005576,extracellular region; GO:0004252,serine-type endopeptidase activity; GO:0006508,proteolysis; GO:0003674,molecular_function; GO:0003824,catalytic activity; GO:0004175,endopeptidase activity; GO:0008233,peptidase activity; GO:0008236,serine-type peptidase activity; GO:0016787,hydrolase activity; GO:0017171,serine hydrolase activity; GO:0140096,catalytic activity, acting on a protein; GO:…	PF00082.25:Subtilase family
160	MELO3C024531.2	100.907	121.012	77.7253	30.51	73.7371	26.8918	42.5949	59.4585	36.9494	2.3015	12.7339	4.9722	chr08	9530844	9533736	-	--	--	GDSL esterase/lipase At5g03610-like [Cucumis melo]	GDL71_ARATH RecName: Full=GDSL esterase/lipase At5g03610; EC=3.1.1.-; AltName: Full=Extracellular lipase At5g03610; Flags: Precursor;	A0A5D3CAN3_CUCME SubName: Full=GDSL esterase/lipase {ECO:0000313|EMBL:TYK07396.1};	--	GO:0005576,extracellular region; GO:0016788,hydrolase activity, acting on ester bonds; GO:0016042,lipid catabolic process; GO:0003674,molecular_function; GO:0003824,catalytic activity; GO:0016787,hydrolase activity; GO:0006629,lipid metabolic process; GO:0008150,biological_process; GO:0008152,metabolic process; GO:0009056,catabolic process; GO:0044238,primary metabolic process; GO:0071704,organic…	PF00657.25:GDSL-like Lipase/Acylhydrolase
161	MELO3C024545.2	66.5305	65.1386	68.2199	13.7818	17.8968	21.6591	21.6525	23.2295	25.6425	10.8357	8.2764	7.9668	chr08	9434214	9434941	-	--	--	protein BIC1-like [Cucumis melo]	BIC1_ARATH RecName: Full=Protein BIC1 {ECO:0000303|PubMed:27846570}; AltName: Full=BLUE-LIGHT INHIBITOR OF CRYPTOCHROMES 1 {ECO:0000303|PubMed:27846570};	A0A5D3C697_CUCME SubName: Full=Protein BIC1 isoform X1 {ECO:0000313|EMBL:TYK07411.1};	--	GO:0005634,nucleus; GO:0009785,blue light signaling pathway; GO:0007154,cell communication; GO:0007165,signal transduction; GO:0008150,biological_process; GO:0009314,response to radiation; GO:0009416,response to light stimulus; GO:0009628,response to abiotic stimulus; GO:0009637,response to blue light; GO:0009987,cellular process; GO:0023052,signaling; GO:0030522,intracellular receptor signaling …	--
162	MELO3C024725.2	2.4471	2.9043	2.1777	1.4374	1.2885	1.5035	0.5838	0.5446	0.6282	0.4843	0.5892	0.645	chr11	7363803	7367050	+	--	--	disease resistance protein RGA2-like [Cucumis melo]	RGA2_SOLBU RecName: Full=Disease resistance protein RGA2; AltName: Full=Blight resistance protein RPI; AltName: Full=RGA2-blb;	A0A1S3CHQ5_CUCME SubName: Full=disease resistance protein RGA2-like {ECO:0000313|RefSeq:XP_008462780.1};	Apoptotic ATPase	GO:0043531,ADP binding; GO:0005524,ATP binding; GO:0098542,defense response to other organism; GO:0000166,nucleotide binding; GO:0003674,molecular_function; GO:0005488,binding; GO:0017076,purine nucleotide binding; GO:0030554,adenyl nucleotide binding; GO:0032553,ribonucleotide binding; GO:0032555,purine ribonucleotide binding; GO:0032559,adenyl ribonucleotide binding; GO:0036094,small molecule b…	PF00931.25:NB-ARC domain
163	MELO3C024731.2	1.2886	0.9592	1.0566	2.3513	1.3706	1.8428	0	0	0	0	0	0	chr11	7431204	7434218	-	--	--	disease resistance protein RGA2-like [Cucumis melo]	RGA3_SOLBU RecName: Full=Putative disease resistance protein RGA3; AltName: Full=Blight resistance protein B149; AltName: Full=RGA1-blb;	A0A1S3CHQ5_CUCME SubName: Full=disease resistance protein RGA2-like {ECO:0000313|RefSeq:XP_008462780.1};	Apoptotic ATPase	GO:0043531,ADP binding; GO:0005524,ATP binding; GO:0050832,defense response to fungus; GO:0000166,nucleotide binding; GO:0003674,molecular_function; GO:0005488,binding; GO:0017076,purine nucleotide binding; GO:0030554,adenyl nucleotide binding; GO:0032553,ribonucleotide binding; GO:0032555,purine ribonucleotide binding; GO:0032559,adenyl ribonucleotide binding; GO:0036094,small molecule binding; …	PF00931.25:NB-ARC domain
164	MELO3C025508.2	1.4958	0.474	1.1173	1.2559	1.2314	0.9967	0	0	0	0	0	0	chr09	6484660	6485646	-	--	--	uncharacterized protein LOC107992016 [Cucumis melo]	--	A0A5D3C3C3_CUCME SubName: Full=Uncharacterized protein {ECO:0000313|EMBL:TYK05708.1};	--	--	--
165	MELO3C026046.2	10.3662	8.9254	8.5712	27.6764	31.9177	26.6548	6.5451	2.3532	1.8738	12.1399	9.9552	10.4652	chr08	28592781	28595439	+	K10765 alkylated DNA repair protein alkB homolog 1 [EC:1.14.11.51 4.2.99.18 1.14.11.-] | (RefSeq) alpha-ketoglutarate-dependent dioxygenase alkB (A)	--	uncharacterized protein LOC103502183 [Cucumis melo]	ALKBH_ARATH RecName: Full=Alpha-ketoglutarate-dependent dioxygenase alkB; EC=1.14.11.-; AltName: Full=Alkylated DNA repair protein alkB homolog;	A0A1S4E4K6_CUCME SubName: Full=uncharacterized protein LOC103502183 {ECO:0000313|RefSeq:XP_016903166.1, ECO:0000313|RefSeq:XP_016903167.1};	DNA alkylation damage repair protein	GO:0005737,cytoplasm; GO:0005634,nucleus; GO:0008198,ferrous iron binding; GO:0035516,oxidative DNA demethylase activity; GO:0035515,oxidative RNA demethylase activity; GO:0006281,DNA repair; GO:0035513,oxidative RNA demethylation; GO:0035552,oxidative single-stranded DNA demethylation; GO:0003674,molecular_function; GO:0005488,binding; GO:0005506,iron ion binding; GO:0043167,ion binding; GO:0043…	PF13532.9:2OG-Fe(II) oxygenase superfamily
166	MELO3C026047.2	11.0873	10.8936	13.7574	38.3302	42.6449	35.3929	0	0	0	0	0	0	chr08	28584918	28585291	+	--	--	2-oxoglutarate-dependent dioxygenase family protein isoform 1 [Cucumis melo var. makuwa]	--	A0A5A7U7Q2_CUCME SubName: Full=2-oxoglutarate-dependent dioxygenase family protein isoform 1 {ECO:0000313|EMBL:KAA0050407.1};	--	GO:0051213,dioxygenase activity; GO:0006281,DNA repair; GO:0003674,molecular_function; GO:0003824,catalytic activity; GO:0016491,oxidoreductase activity; GO:0006139,nucleobase-containing compound metabolic process; GO:0006259,DNA metabolic process; GO:0006725,cellular aromatic compound metabolic process; GO:0006807,nitrogen compound metabolic process; GO:0006950,response to stress; GO:0006974,cel…	--
167	MELO3C026134.2	9.8067	9.0254	8.9167	8.0433	5.344	5.775	0	0	0	0	0	0	chr03	18034072	18034726	-	--	--	transcription factor IBH1 [Cucumis melo]	IBH1_ARATH RecName: Full=Transcription factor IBH1; Short=AtIBH1; AltName: Full=BHLH transcription factor zeta; Short=bHLH zeta; AltName: Full=Basic helix-loop-helix protein 158; Short=AtbHLH158; Short=bHLH 158; AltName: Full=Protein ILI1-BINDING BHLH 1; AltName: Full=bHLH transcription factor bHLH158;	A0A5D3BPL2_CUCME SubName: Full=Transcription factor IBH1 {ECO:0000313|EMBL:TYK01643.1};	--	GO:0005634,nucleus; GO:0003700,DNA-binding transcription factor activity; GO:0046983,protein dimerization activity; GO:0000976,transcription regulatory region sequence-specific DNA binding; GO:0009742,brassinosteroid mediated signaling pathway; GO:0009740,gibberellic acid mediated signaling pathway; GO:0040008,regulation of growth; GO:0003674,molecular_function; GO:0140110,transcription regulator…	--
168	MELO3C026311.2	4.4795	5.8698	4.4077	26.8928	30.8743	25.7465	2.5591	2.4566	2.2608	15.5375	13.9934	14.8709	chr07	11802767	11805657	-	K13430 serine/threonine-protein kinase PBS1 [EC:2.7.11.1] | (RefSeq) serine/threonine-protein kinase PBS1 (A)	ko04626: Plant-pathogen interaction	receptor-like protein kinase FERONIA [Cucumis melo]	FERON_ARATH RecName: Full=Receptor-like protein kinase FERONIA; EC=2.7.11.1; AltName: Full=Protein SIRENE; Flags: Precursor;	A0A1S3CLU4_CUCME SubName: Full=receptor-like protein kinase FERONIA {ECO:0000313|RefSeq:XP_008464586.1};	Serine/threonine protein kinase	GO:0043680,filiform apparatus; GO:0016021,integral component of membrane; GO:0005886,plasma membrane; GO:0009506,plasmodesma; GO:0005524,ATP binding; GO:0004672,protein kinase activity; GO:0106310,protein serine kinase activity; GO:0004674,protein serine/threonine kinase activity; GO:0004714,transmembrane receptor protein tyrosine kinase activity; GO:0009738,abscisic acid-activated signaling path…	PF07714.20:Protein tyrosine and serine/threonine kinase
169	MELO3C026367.2	96.1838	84.1592	79.8925	39.0115	31.3559	29.1788	1.0964	1.5265	1.8963	1.381	1.4822	0.7159	chr07	5714952	5717146	+	K08237 hydroquinone glucosyltransferase [EC:2.4.1.218] | (RefSeq) hydroquinone glucosyltransferase-like (A)	--	anthocyanidin 3-O-glucosyltransferase 2-like [Cucumis melo var. makuwa]	UFOG3_FRAAN RecName: Full=Putative UDP-glucose flavonoid 3-O-glucosyltransferase 3 {ECO:0000250|UniProtKB:Q2V6K0}; Short=FaGT3 {ECO:0000303|PubMed:16443693}; EC=2.4.1.- {ECO:0000250|UniProtKB:Q2V6K0}; AltName: Full=Flavonol 3-O-glucosyltransferase 3 {ECO:0000250|UniProtKB:Q2V6K0};	A0A5D3DW35_CUCME RecName: Full=Glycosyltransferase {ECO:0000256|RuleBase:RU362057}; EC=2.4.1.- {ECO:0000256|RuleBase:RU362057};	UDP-glucuronosyl and UDP-glucosyl transferase	GO:0008194,UDP-glycosyltransferase activity; GO:0003674,molecular_function; GO:0003824,catalytic activity; GO:0016740,transferase activity; GO:0016757,transferase activity, transferring glycosyl groups	PF00201.21:UDP-glucoronosyl and UDP-glucosyl transferase
170	MELO3C026372.2	2.3714	4.5329	2.2787	4.9323	5.8422	8.3154	0.0216	0.229	0.1601	0.0292	0.0451	0.029	chr07	5731751	5733148	+	K08237 hydroquinone glucosyltransferase [EC:2.4.1.218] | (RefSeq) hydroquinone glucosyltransferase-like (A)	--	anthocyanidin 3-O-glucosyltransferase 2-like isoform X1 [Cucumis melo var. makuwa]	U7A15_MALDO RecName: Full=UDP-glycosyltransferase 71A15 {ECO:0000303|Ref.1}; EC=2.4.1.- {ECO:0000305}; AltName: Full=UDP-glucose:chalcone 2'-O-glucosyltransferase {ECO:0000305}; AltName: Full=UDP-glucose:flavonol 2'-O-glucosyltransferase {ECO:0000305};	A0A5A7VHR6_CUCME RecName: Full=Glycosyltransferase {ECO:0000256|RuleBase:RU362057}; EC=2.4.1.- {ECO:0000256|RuleBase:RU362057};	UDP-glucuronosyl and UDP-glucosyl transferase	GO:0035251,UDP-glucosyltransferase activity; GO:0003674,molecular_function; GO:0003824,catalytic activity; GO:0008194,UDP-glycosyltransferase activity; GO:0016740,transferase activity; GO:0016757,transferase activity, transferring glycosyl groups; GO:0016758,transferase activity, transferring hexosyl groups; GO:0046527,glucosyltransferase activity	PF00201.21:UDP-glucoronosyl and UDP-glucosyl transferase
171	MELO3C026375.2	6.4065	5.861	5.7246	10.0837	11.0515	8.2416	0.1067	0	0	0	0	0	chr07	5745562	5747160	+	K08237 hydroquinone glucosyltransferase [EC:2.4.1.218] | (RefSeq) hydroquinone glucosyltransferase-like (A)	--	anthocyanidin 3-O-glucosyltransferase 2-like [Cucumis melo var. makuwa]	UFOG3_FRAAN RecName: Full=Putative UDP-glucose flavonoid 3-O-glucosyltransferase 3 {ECO:0000250|UniProtKB:Q2V6K0}; Short=FaGT3 {ECO:0000303|PubMed:16443693}; EC=2.4.1.- {ECO:0000250|UniProtKB:Q2V6K0}; AltName: Full=Flavonol 3-O-glucosyltransferase 3 {ECO:0000250|UniProtKB:Q2V6K0};	A0A1S3CM68_CUCME SubName: Full=putative UDP-glucose flavonoid 3-O-glucosyltransferase 3 {ECO:0000313|RefSeq:XP_008464689.1};	UDP-glucuronosyl and UDP-glucosyl transferase	GO:0008194,UDP-glycosyltransferase activity; GO:0003674,molecular_function; GO:0003824,catalytic activity; GO:0016740,transferase activity; GO:0016757,transferase activity, transferring glycosyl groups	--
172	MELO3C026558.2	7.6993	6.7738	7.4981	5.5693	5.6447	5.736	3.0473	2.1144	1.8505	2.1741	1.5251	0.9985	chr03	24890565	24896060	+	K05387 glutamate receptor, ionotropic, plant | (RefSeq) glutamate receptor 2.9-like (A)	--	glutamate receptor 2.9-like isoform X1 [Cucumis melo]	GLR27_ARATH RecName: Full=Glutamate receptor 2.7; AltName: Full=Ligand-gated ion channel 2.7; Flags: Precursor;	A0A1S3CMI1_CUCME RecName: Full=Glutamate receptor {ECO:0000256|PIRNR:PIRNR037090};	Glutamate-gated kainate-type ion channel receptor subunit GluR5 and related subunits	GO:0016021,integral component of membrane; GO:0000325,plant-type vacuole; GO:0005886,plasma membrane; GO:0005262,calcium channel activity; GO:0008066,glutamate receptor activity; GO:0015276,ligand-gated ion channel activity; GO:0038023,signaling receptor activity; GO:0006816,calcium ion transport; GO:0019722,calcium-mediated signaling; GO:0071230,cellular response to amino acid stimulus; GO:00036…	PF01094.31:Receptor family ligand binding region
173	MELO3C026687.2	4.3168	4.5472	4.6236	9.5018	8.8669	12.4615	1.8992	1.1899	1.6893	5.0127	6.6018	3.3161	chr10	26323413	26323730	-	--	--	uncharacterized protein E6C27_scaffold17G00660 [Cucumis melo var. makuwa]	--	A0A5D3DZD3_CUCME SubName: Full=Uncharacterized protein {ECO:0000313|EMBL:TYK28881.1};	--	GO:0016021,integral component of membrane; GO:0005575,cellular_component; GO:0016020,membrane; GO:0031224,intrinsic component of membrane; GO:0110165,cellular anatomical entity	--
174	MELO3C026942.2	76.7459	57.5154	61.1262	95.4151	85.8107	102.151	0	0	0	0	0	0	chr06	17381714	17382103	+	K07513 acetyl-CoA acyltransferase 1 [EC:2.3.1.16] | (RefSeq) 3-ketoacyl-CoA thiolase 2, peroxisomal (A)	ko00071: Fatty acid degradation; ko00280: Valine, leucine and isoleucine degradation; ko00592: alpha-Linolenic acid metabolism; ko01040: Biosynthesis of unsaturated fatty acids; ko01100: Metabolic pathways; ko01110: Biosynthesis of secondary metabolites; ko01212: Fatty acid metabolism; ko04146: Peroxisome	3-ketoacyl-CoA thiolase 1, peroxisomal-like [Cucumis melo]	THIK1_ARATH RecName: Full=3-ketoacyl-CoA thiolase 1, peroxisomal; EC=2.3.1.16; AltName: Full=Acetyl-CoA acyltransferase 1; AltName: Full=Beta-ketothiolase 1; AltName: Full=Peroxisomal 3-oxoacyl-CoA thiolase 1; Flags: Precursor;	A0A5A7UYP8_CUCME SubName: Full=3-ketoacyl-CoA thiolase 1, peroxisomal-like isoform X1 {ECO:0000313|EMBL:KAA0059777.1};	3-oxoacyl CoA thiolase	GO:0005777,peroxisome; GO:0000325,plant-type vacuole; GO:0003988,acetyl-CoA C-acyltransferase activity; GO:0006635,fatty acid beta-oxidation; GO:0006633,fatty acid biosynthetic process; GO:0031408,oxylipin biosynthetic process; GO:0010124,phenylacetate catabolic process; GO:0003674,molecular_function; GO:0003824,catalytic activity; GO:0016408,C-acyltransferase activity; GO:0016740,transferase act…	PF02803.21:Thiolase, C-terminal domain
175	MELO3C027119.2	31.0905	26.5215	26.6927	61.1538	58.402	65.6202	8.6521	11.5555	14.042	24.1485	21.7211	23.8489	chr00	2929000	2931086	-	K05278 flavonol synthase [EC:1.14.20.6] | (RefSeq) flavonol synthase/flavanone 3-hydroxylase (A)	ko00941: Flavonoid biosynthesis; ko01100: Metabolic pathways; ko01110: Biosynthesis of secondary metabolites	protein SRG1-like [Cucumis melo var. makuwa]	JOX4_ARATH RecName: Full=Jasmonate-induced oxygenase 4 {ECO:0000303|PubMed:28559313}; EC=1.14.11.- {ECO:0000269|PubMed:28559313, ECO:0000269|PubMed:28760569}; AltName: Full=2-oxoglutarate-dependent dioxygenase JOX4 {ECO:0000305}; AltName: Full=Anthocyanidin synthase {ECO:0000305}; AltName: Full=Jasmonic acid oxidase 4 {ECO:0000303|PubMed:28760569};	A0A5D3CEG2_CUCME SubName: Full=Protein SRG1-like {ECO:0000313|EMBL:TYK10347.1};	Iron/ascorbate family oxidoreductases	GO:0005829,cytosol; GO:0051213,dioxygenase activity; GO:0005506,iron ion binding; GO:0120091,jasmonic acid hydrolase; GO:0006952,defense response; GO:1900366,negative regulation of defense response to insect; GO:1900150,regulation of defense response to fungus; GO:2000022,regulation of jasmonic acid mediated signaling pathway; GO:0003674,molecular_function; GO:0003824,catalytic activity; GO:00164…	PF14226.9:non-haem dioxygenase in morphine synthesis N-terminal
176	MELO3C027120.2	7.5362	5.9594	4.816	12.8435	18.91	22.322	1.5954	2.1396	1.5425	3.3174	4.0187	4.1614	chr00	2931486	2933095	-	K05278 flavonol synthase [EC:1.14.20.6] | (RefSeq) flavonol synthase/flavanone 3-hydroxylase (A)	ko00941: Flavonoid biosynthesis; ko01100: Metabolic pathways; ko01110: Biosynthesis of secondary metabolites	jasmonate-induced oxygenase 4-like isoform X1 [Cucumis melo]	JOX4_ARATH RecName: Full=Jasmonate-induced oxygenase 4 {ECO:0000303|PubMed:28559313}; EC=1.14.11.- {ECO:0000269|PubMed:28559313, ECO:0000269|PubMed:28760569}; AltName: Full=2-oxoglutarate-dependent dioxygenase JOX4 {ECO:0000305}; AltName: Full=Anthocyanidin synthase {ECO:0000305}; AltName: Full=Jasmonic acid oxidase 4 {ECO:0000303|PubMed:28760569};	A0A1S3CP33_CUCME SubName: Full=protein SRG1-like {ECO:0000313|RefSeq:XP_008465535.1, ECO:0000313|RefSeq:XP_016903407.1};	Iron/ascorbate family oxidoreductases	GO:0005829,cytosol; GO:0051213,dioxygenase activity; GO:0005506,iron ion binding; GO:0120091,jasmonic acid hydrolase; GO:0006952,defense response; GO:1900366,negative regulation of defense response to insect; GO:1900150,regulation of defense response to fungus; GO:2000022,regulation of jasmonic acid mediated signaling pathway; GO:0003674,molecular_function; GO:0003824,catalytic activity; GO:00164…	PF14226.9:non-haem dioxygenase in morphine synthesis N-terminal
177	MELO3C027132.2	4.2943	3.5626	3.0238	6.3823	5.5425	5.9334	0	0.0202	0	0	0	0	chr00	3277937	3281500	+	--	--	putative disease resistance RPP13-like protein 1 isoform X1 [Cucumis melo var. makuwa]	RGA1_SOLBU RecName: Full=Putative disease resistance protein RGA1; AltName: Full=RGA3-blb;	A0A1S4E5A9_CUCME SubName: Full=putative disease resistance protein RGA1 {ECO:0000313|RefSeq:XP_016903409.1};	Apoptotic ATPase	GO:0043531,ADP binding; GO:0005524,ATP binding; GO:0050832,defense response to fungus; GO:0000166,nucleotide binding; GO:0003674,molecular_function; GO:0005488,binding; GO:0017076,purine nucleotide binding; GO:0030554,adenyl nucleotide binding; GO:0032553,ribonucleotide binding; GO:0032555,purine ribonucleotide binding; GO:0032559,adenyl ribonucleotide binding; GO:0036094,small molecule binding; …	PF12799.10:Leucine Rich repeats (2 copies)
178	MELO3C027288.2	9.8106	10.8883	9.2216	42.466	97.4703	31.9426	5.0484	4.92	1.8779	16.818	31.6007	34.5284	chr00	6084921	6088960	-	K01754 threonine dehydratase [EC:4.3.1.19] | (RefSeq) threonine dehydratase biosynthetic, chloroplastic-like (A)	ko00260: Glycine, serine and threonine metabolism; ko00290: Valine, leucine and isoleucine biosynthesis; ko01100: Metabolic pathways; ko01110: Biosynthesis of secondary metabolites; ko01200: Carbon metabolism; ko01230: Biosynthesis of amino acids	threonine dehydratase biosynthetic, chloroplastic-like [Cucumis melo]	THD1_ARATH RecName: Full=Threonine dehydratase biosynthetic, chloroplastic; EC=4.3.1.19; AltName: Full=Threonine deaminase; Short=TD; Flags: Precursor;	A0A5D3C648_CUCME RecName: Full=Threonine dehydratase {ECO:0000256|RuleBase:RU362012}; EC=4.3.1.19 {ECO:0000256|RuleBase:RU362012}; AltName: Full=Threonine deaminase {ECO:0000256|RuleBase:RU362012};	Threonine/serine dehydratases	GO:0009507,chloroplast; GO:0003941,L-serine ammonia-lyase activity; GO:0004794,L-threonine ammonia-lyase activity; GO:0030170,pyridoxal phosphate binding; GO:0009097,isoleucine biosynthetic process; GO:0006565,L-serine catabolic process; GO:0006567,threonine catabolic process; GO:0003674,molecular_function; GO:0003824,catalytic activity; GO:0016829,lyase activity; GO:0016840,carbon-nitrogen lyase…	PF00291.28:Pyridoxal-phosphate dependent enzyme
179	MELO3C027384.2	1.7026	2.118	2.6035	3.3182	3.4863	3.9746	0	0.058	0	0.5699	1.0455	0.7271	chr00	7421701	7422202	+	--	--	probable receptor-like protein kinase At2g23200 [Cucumis melo]	Y2232_ARATH RecName: Full=Probable receptor-like protein kinase At2g23200; EC=2.7.11.-; Flags: Precursor;	A0A5A7SPP2_CUCME SubName: Full=Putative receptor-like protein kinase {ECO:0000313|EMBL:KAA0032498.1};	Serine/threonine protein kinase	GO:0016021,integral component of membrane; GO:0005886,plasma membrane; GO:0005773,vacuole; GO:0005524,ATP binding; GO:0004672,protein kinase activity; GO:0004674,protein serine/threonine kinase activity; GO:0004714,transmembrane receptor protein tyrosine kinase activity; GO:0046777,protein autophosphorylation; GO:0000166,nucleotide binding; GO:0003674,molecular_function; GO:0005488,binding; GO:00…	--
180	MELO3C027467.2	0.7327	0.7519	0.8088	1.2876	0.9627	1.1759	0	0.1029	0.095	0.0867	0.1039	0.1721	chr00	2651391	2655942	+	K00873 pyruvate kinase [EC:2.7.1.40] | (RefSeq) pyruvate kinase 2, cytosolic-like (A)	ko00010: Glycolysis / Gluconeogenesis; ko00620: Pyruvate metabolism; ko01100: Metabolic pathways; ko01110: Biosynthesis of secondary metabolites; ko01200: Carbon metabolism; ko01230: Biosynthesis of amino acids	pyruvate kinase 2, cytosolic-like [Cucumis melo]	KPYC2_ORYSI RecName: Full=Pyruvate kinase 2, cytosolic {ECO:0000305}; Short=OsPK2 {ECO:0000305}; EC=2.7.1.40 {ECO:0000305};	A0A0A0KKD4_CUCSA RecName: Full=Pyruvate kinase {ECO:0000256|ARBA:ARBA00012142, ECO:0000256|RuleBase:RU000504}; EC=2.7.1.40 {ECO:0000256|ARBA:ARBA00012142, ECO:0000256|RuleBase:RU000504};	Pyruvate kinase	GO:0005829,cytosol; GO:0005524,ATP binding; GO:0016301,kinase activity; GO:0000287,magnesium ion binding; GO:0030955,potassium ion binding; GO:0004743,pyruvate kinase activity; GO:0000166,nucleotide binding; GO:0003674,molecular_function; GO:0005488,binding; GO:0017076,purine nucleotide binding; GO:0030554,adenyl nucleotide binding; GO:0032553,ribonucleotide binding; GO:0032555,purine ribonucleot…	PF00224.24:Pyruvate kinase, barrel domain
181	MELO3C027618.2	15.6898	14.5174	12.2723	21.697	26.7617	29.9098	0	0	0	0	0	0	chr00	9827301	9829980	-	K20858 calcium uniporter protein, mitochondrial | (RefSeq) calcium uniporter protein 2, mitochondrial (A)	--	hypothetical protein E5676_scaffold827G00010 [Cucumis melo var. makuwa]	--	A0A5D3BNC8_CUCME SubName: Full=Uncharacterized protein {ECO:0000313|EMBL:TYK01301.1};	--	--	--
182	MELO3C027702.2	21.4112	17.012	16.6999	23.0706	25.496	23.5856	0	0	0	0	0	0	chr00	4296298	4296522	+	K07937 ADP-ribosylation factor 1/2 | (RefSeq) ADP-ribosylation factor 2 (A)	ko04144: Endocytosis	ADP-ribosylation factor 2 [Cucumis melo var. makuwa]	ARF1_ORYSJ RecName: Full=ADP-ribosylation factor 1; AltName: Full=13 kDa cold-induced protein;	A0A5D3CPT1_CUCME SubName: Full=ADP-ribosylation factor 2 {ECO:0000313|EMBL:TYK13450.1};	GTP-binding ADP-ribosylation factor Arf1	GO:0005794,Golgi apparatus; GO:0005525,GTP binding; GO:0003924,GTPase activity; GO:0006886,intracellular protein transport; GO:0016192,vesicle-mediated transport; GO:0000166,nucleotide binding; GO:0001882,nucleoside binding; GO:0001883,purine nucleoside binding; GO:0003674,molecular_function; GO:0005488,binding; GO:0017076,purine nucleotide binding; GO:0019001,guanyl nucleotide binding; GO:003254…	PF00025.24:ADP-ribosylation factor family
183	MELO3C027727.2	18.9746	23.812	31.2858	15.3765	14.0158	10.8067	3.659	3.9728	10.1629	3.0171	2.807	0.5649	chr00	4635121	4635934	-	K15803 (-)-germacrene D synthase [EC:4.2.3.75] | (RefSeq) (-)-germacrene D synthase-like (A)	ko00909: Sesquiterpenoid and triterpenoid biosynthesis	(-)-germacrene D synthase-like isoform X6 [Cucumis melo]	TPS2_TOOSI RecName: Full=Sesquiterpene synthase 2 {ECO:0000303|PubMed:23072391}; Short=TsTPS2 {ECO:0000303|PubMed:23072391}; AltName: Full=Alpha-humulene synthase TPS2 {ECO:0000303|PubMed:21818683, ECO:0000303|PubMed:23072391}; EC=4.2.3.104 {ECO:0000269|PubMed:21818683, ECO:0000269|PubMed:23072391}; AltName: Full=Alpha-selinene synthase TPS2 {ECO:0000303|PubMed:23072391}; EC=4.2.3.198 {ECO:000026…	A0A0A0L782_CUCSA SubName: Full=Uncharacterized protein {ECO:0000313|EMBL:KGN55966.1};	--	GO:0102889,beta-elemene synthase activity; GO:0000287,magnesium ion binding; GO:0010334,sesquiterpene synthase activity; GO:0016102,diterpenoid biosynthetic process; GO:0051762,sesquiterpene biosynthetic process; GO:0003674,molecular_function; GO:0003824,catalytic activity; GO:0016829,lyase activity; GO:0016835,carbon-oxygen lyase activity; GO:0016838,carbon-oxygen lyase activity, acting on phosp…	PF19086.3:Terpene synthase family 2, C-terminal metal binding
184	MELO3C028569.2	55.555	58.4017	61.1153	70.1775	94.5882	89.962	22.7575	17.4008	11.3539	35.2453	36.0545	32.9169	chr00	32167410	32167685	+	--	--	--	--	--	--	--	--
185	MELO3C028570.2	8.4879	6.2514	4.9207	7.0008	9.4887	11.8525	3.2744	1.8937	1.8338	2.0683	4.1482	3.2251	chr00	32165810	32168464	-	--	--	ty3-gypsy retrotransposon protein [Cucumis melo var. makuwa]	--	A0A5A7UUZ2_CUCME SubName: Full=Ty3-gypsy retrotransposon protein {ECO:0000313|EMBL:KAA0059742.1};	--	--	--
186	MELO3C028826.2	0.862	0.3653	0.6138	0.1871	0.6263	0.7884	0.0486	0	0	0.0219	0.0451	0.0653	chr01	7992990	7997303	-	K16871 4-aminobutyrate---pyruvate transaminase [EC:2.6.1.96] | (RefSeq) gamma-aminobutyrate transaminase POP2, mitochondrial-like (A)	ko00250: Alanine, aspartate and glutamate metabolism; ko00650: Butanoate metabolism; ko01100: Metabolic pathways	CACTA en-spm transposon protein [Cucumis melo var. makuwa]	--	A0A5A7UMS8_CUCME SubName: Full=CACTA en-spm transposon protein {ECO:0000313|EMBL:KAA0056494.1};	--	--	PF13952.9:Domain of unknown function (DUF4216)
187	MELO3C028851.2	2.1994	1.8635	1.8687	2.4934	3.1857	3.0946	0	0	0	0	0	0	chr01	26476373	26487565	-	K24348 UBX domain-containing protein 1/4 | (RefSeq) chromatin assembly factor 1 subunit A (A)	ko04141: Protein processing in endoplasmic reticulum	uncharacterized protein E6C27_scaffold67G006610 [Cucumis melo var. makuwa]	--	A0A5A7TK96_CUCME RecName: Full=CCHC-type domain-containing protein {ECO:0000259|PROSITE:PS50158};	Predicted ubiquitin regulatory protein	GO:0003676,nucleic acid binding; GO:0008270,zinc ion binding; GO:0003674,molecular_function; GO:0005488,binding; GO:0097159,organic cyclic compound binding; GO:1901363,heterocyclic compound binding; GO:0043167,ion binding; GO:0043169,cation binding; GO:0046872,metal ion binding; GO:0046914,transition metal ion binding	--
188	MELO3C028976.2	76.6141	63.4547	60.2831	119.081	116.677	137.366	21.6213	18.5702	13.7882	36.8671	40.1401	40.5584	chr01	35306696	35308827	+	--	--	thionin-like protein 2 [Cucumis melo var. makuwa]	--	A0A5D3BCH5_CUCME SubName: Full=Thionin-like protein 2 {ECO:0000313|EMBL:TYJ97540.1};	--	--	--
189	MELO3C029257.2	28.3076	23.37	27.7232	49.3812	52.1508	59.8177	3.8433	3.3517	2.3514	9.248	9.9667	9.5046	chr01	35304917	35307134	+	--	--	--	--	--	--	--	--
190	MELO3C029313.2	20.1598	23.1284	25.1053	16.0244	18.4813	16.2305	8.5222	10.465	10.8456	8.4274	10.551	5.8015	chr02	1094589	1097026	-	--	--	uncharacterized protein LOC103492218 isoform X1 [Cucumis melo]	--	A0A1S3BP83_CUCME SubName: Full=uncharacterized protein LOC103492218 {ECO:0000313|RefSeq:XP_008450723.1};	--	GO:0016020,membrane; GO:0005524,ATP binding; GO:0004176,ATP-dependent peptidase activity; GO:0004222,metalloendopeptidase activity; GO:0006508,proteolysis; GO:0000166,nucleotide binding; GO:0003674,molecular_function; GO:0005488,binding; GO:0017076,purine nucleotide binding; GO:0030554,adenyl nucleotide binding; GO:0032553,ribonucleotide binding; GO:0032555,purine ribonucleotide binding; GO:00325…	--
191	MELO3C029614.2	8.3699	9.7938	6.4433	5.2242	5.3811	4.3365	0	0.1111	0.1139	0	0.1068	0.0516	chr02	13488805	13493296	+	--	--	--	--	--	--	--	--
192	MELO3C029630.2	6.5311	5.8029	4.8672	10.9055	10.8314	13.8079	0	0	0	0	0	0	chr02	14950081	14953791	-	K05954 protein farnesyltransferase subunit beta [EC:2.5.1.58] | (RefSeq) protein farnesyltransferase subunit beta (A)	ko00900: Terpenoid backbone biosynthesis; ko01110: Biosynthesis of secondary metabolites	serine/threonine-protein kinase STY17-like [Cucumis melo var. makuwa]	FNTB_PEA RecName: Full=Protein farnesyltransferase subunit beta; Short=FTase-beta; EC=2.5.1.58; AltName: Full=CAAX farnesyltransferase subunit beta; AltName: Full=Ras proteins prenyltransferase subunit beta;	A0A5A7SV44_CUCME SubName: Full=Serine/threonine-protein kinase STY17-like {ECO:0000313|EMBL:KAA0035144.1};	Tyrosine kinase specific for activated (GTP-bound) p21cdc42Hs	GO:0005965,protein farnesyltransferase complex; GO:0004660,protein farnesyltransferase activity; GO:0008270,zinc ion binding; GO:0018343,protein farnesylation; GO:0003674,molecular_function; GO:0003824,catalytic activity; GO:0004659,prenyltransferase activity; GO:0008318,protein prenyltransferase activity; GO:0016740,transferase activity; GO:0016765,transferase activity, transferring alkyl or ary…	PF07714.20:Protein tyrosine and serine/threonine kinase
193	MELO3C029670.2	2.5667	4.2147	3.3115	8.8411	9.4895	10.1526	0	0	0	0	0	0	chr02	18552245	18554719	-	K07179 RIO kinase 2 [EC:2.7.11.1] | (RefSeq) serine/threonine-protein kinase rio2 (A)	ko03008: Ribosome biogenesis in eukaryotes	serine/threonine-protein kinase rio2 [Cucumis melo var. makuwa]	--	A0A5A7TPQ4_CUCME SubName: Full=Serine/threonine-protein kinase rio2 {ECO:0000313|EMBL:KAA0043395.1};	--	GO:0016301,kinase activity; GO:0016310,phosphorylation; GO:0003674,molecular_function; GO:0003824,catalytic activity; GO:0016740,transferase activity; GO:0016772,transferase activity, transferring phosphorus-containing groups; GO:0006793,phosphorus metabolic process; GO:0006796,phosphate-containing compound metabolic process; GO:0008150,biological_process; GO:0008152,metabolic process; GO:0009987…	--
194	MELO3C029695.2	22.189	13.2492	16.4132	23.0497	30.7442	32.5028	7.2436	6.1659	3.0681	16.6801	12.4916	14.2776	chr02	20083160	20083480	+	--	--	--	--	--	--	--	--
195	MELO3C029740.2	13.9537	17.0886	16.7784	5.6537	5.8689	6.3162	0.4353	1.6258	1.0486	0.0736	0.5296	0.1462	chr02	24034491	24039852	+	K05929 phosphoethanolamine N-methyltransferase [EC:2.1.1.103] | (RefSeq) 7G07; phosphoethanolamine N-methyltransferase 1 (A)	ko00564: Glycerophospholipid metabolism	phosphoethanolamine N-methyltransferase-like [Cucumis melo]	PEAMT_SPIOL RecName: Full=Phosphoethanolamine N-methyltransferase; EC=2.1.1.103;	A0A1S3BWB8_CUCME SubName: Full=phosphoethanolamine N-methyltransferase-like {ECO:0000313|RefSeq:XP_008453688.1};	SAM-dependent methyltransferases	GO:0005737,cytoplasm; GO:0000234,phosphoethanolamine N-methyltransferase activity; GO:0052667,phosphomethylethanolamine N-methyltransferase activity; GO:0032259,methylation; GO:0006656,phosphatidylcholine biosynthetic process; GO:0003674,molecular_function; GO:0003824,catalytic activity; GO:0008168,methyltransferase activity; GO:0008170,N-methyltransferase activity; GO:0008757,S-adenosylmethionin…	PF13649.9:Methyltransferase domain
196	MELO3C029930.2	13.4187	12.5193	8.7936	15.4431	18.4811	33.0254	0	0	0.0377	0	0.0177	0	chr03	3931931	3935718	-	--	--	transposon Ty3-I Gag-Pol polyprotein isoform X1 [Cucumis melo var. makuwa]	--	A0A5D3DGR0_CUCME RecName: Full=RNA-directed DNA polymerase {ECO:0000256|ARBA:ARBA00012493}; EC=2.7.7.49 {ECO:0000256|ARBA:ARBA00012493};	--	GO:0003676,nucleic acid binding; GO:0008270,zinc ion binding; GO:0003674,molecular_function; GO:0005488,binding; GO:0097159,organic cyclic compound binding; GO:1901363,heterocyclic compound binding; GO:0043167,ion binding; GO:0043169,cation binding; GO:0046872,metal ion binding; GO:0046914,transition metal ion binding	--
197	MELO3C030023.2	2.317	1.9295	1.8268	2.4753	3.8209	2.9217	0	0.0372	0	0.0261	0	0	chr03	6690998	6700051	-	K14376 poly(A) polymerase [EC:2.7.7.19] | (RefSeq) nuclear poly(A) polymerase 4 (A)	ko03015: mRNA surveillance pathway	hypothetical protein E6C27_scaffold90G001590 [Cucumis melo var. makuwa]	PAPS4_ARATH RecName: Full=Nuclear poly(A) polymerase 4 {ECO:0000303|PubMed:18479511}; Short=AtPAP(IV) {ECO:0000303|PubMed:16282318}; Short=PAP(IV) {ECO:0000305}; Short=Poly(A) polymerase IV {ECO:0000305}; Short=nPAP {ECO:0000303|PubMed:16282318}; EC=2.7.7.19 {ECO:0000269|PubMed:15297145}; AltName: Full=Polynucleotide adenylyltransferase 4 {ECO:0000305};	A0A5A7VIY4_CUCME SubName: Full=Uncharacterized protein {ECO:0000313|EMBL:KAA0065691.1};	--	GO:0005634,nucleus; GO:0005524,ATP binding; GO:0046872,metal ion binding; GO:0004652,polynucleotide adenylyltransferase activity; GO:0003723,RNA binding; GO:0006378,mRNA polyadenylation; GO:0043631,RNA polyadenylation; GO:0000166,nucleotide binding; GO:0003674,molecular_function; GO:0005488,binding; GO:0017076,purine nucleotide binding; GO:0030554,adenyl nucleotide binding; GO:0032553,ribonucleot…	--
198	MELO3C030135.2	0.7849	0.6125	0.5392	0.7787	0.6564	0.6693	0	0	0	0	0	0	chr03	11684627	11694187	-	--	--	gag/pol protein, partial [Bryonia dioica]	POLX_TOBAC RecName: Full=Retrovirus-related Pol polyprotein from transposon TNT 1-94; Includes: RecName: Full=Protease; EC=3.4.23.-; Includes: RecName: Full=Reverse transcriptase; EC=2.7.7.49; Includes: RecName: Full=Endonuclease;	E2GK51_BRYDI SubName: Full=Gag/pol protein {ECO:0000313|EMBL:ADJ18449.1}; Flags: Fragment;	FOG: Transposon-encoded proteins with TYA, reverse transcriptase, integrase domains in various combinations	GO:0004190,aspartic-type endopeptidase activity; GO:0004519,endonuclease activity; GO:0003676,nucleic acid binding; GO:0003964,RNA-directed DNA polymerase activity; GO:0008270,zinc ion binding; GO:0015074,DNA integration; GO:0006508,proteolysis; GO:0003674,molecular_function; GO:0003824,catalytic activity; GO:0004175,endopeptidase activity; GO:0008233,peptidase activity; GO:0016787,hydrolase acti…	PF07727.17:Reverse transcriptase (RNA-dependent DNA polymerase)
199	MELO3C030259.2	18.2985	13.8003	14.5779	20.626	17.3523	21.3354	0	0	0	0.1809	0.0619	0.0598	chr03	22021355	22024527	-	K06110 exocyst complex component 3 | (RefSeq) exocyst complex component SEC6 (A)	--	uncharacterized protein LOC103496540 isoform X2 [Cucumis melo]	SEC6_ARATH RecName: Full=Exocyst complex component SEC6; Short=AtSec6;	A0A2N9EIX6_FAGSY SubName: Full=Uncharacterized protein {ECO:0000313|EMBL:SPC74584.1};	Exocyst complex subunit SEC6	GO:0005856,cytoskeleton; GO:0005829,cytosol; GO:0000145,exocyst; GO:0070062,extracellular exosome; GO:0009524,phragmoplast; GO:0005886,plasma membrane; GO:0000149,SNARE binding; GO:0051601,exocyst localization; GO:0006887,exocytosis; GO:0003674,molecular_function; GO:0005488,binding; GO:0005515,protein binding; GO:0008104,protein localization; GO:0008150,biological_process; GO:0009987,cellular pr…	--
200	MELO3C030315.2	1.2427	1.2151	1.4972	3.7172	3.7477	3.4807	0.3419	0.3295	0.1448	0.7932	1.177	0.5466	chr03	28214657	28220530	+	--	--	Retrovirus-related Pol polyprotein from transposon TNT 1-94 [Cucumis melo var. makuwa]	--	A0A1S3BBA1_CUCME SubName: Full=uncharacterized protein LOC103488200 {ECO:0000313|RefSeq:XP_008445037.1};	FOG: Transposon-encoded proteins with TYA, reverse transcriptase, integrase domains in various combinations	GO:0003676,nucleic acid binding; GO:0008270,zinc ion binding; GO:0003674,molecular_function; GO:0005488,binding; GO:0097159,organic cyclic compound binding; GO:1901363,heterocyclic compound binding; GO:0043167,ion binding; GO:0043169,cation binding; GO:0046872,metal ion binding; GO:0046914,transition metal ion binding	PF14223.9:gag-polypeptide of LTR copia-type
201	MELO3C030400.2	1.1347	1.2482	1.1466	3.9381	4.6113	7.6557	0.3275	0.5757	0.3142	0.4781	0.5849	0.7763	chr04	1785542	1790850	+	--	--	agamous-like MADS-box protein AGL16 isoform X9 [Cucumis melo]	--	--	--	--	--
202	MELO3C030924.2	4.3916	2.4584	3.0691	5.5233	3.5595	5.4462	0.1746	0.1122	0	0.0788	0.2832	0.0781	chr04	24142403	24146439	-	K02137 F-type H+-transporting ATPase subunit O | (RefSeq) ATP synthase subunit O, mitochondrial (A)	ko00190: Oxidative phosphorylation; ko01100: Metabolic pathways	ATP synthase subunit O, mitochondrial-like [Benincasa hispida]	ATPO_IPOBA RecName: Full=ATP synthase subunit O, mitochondrial; AltName: Full=Oligomycin sensitivity conferral protein; Short=OSCP; Flags: Precursor;	A0A6J1DGN4_MOMCH SubName: Full=ATP synthase subunit O, mitochondrial-like {ECO:0000313|RefSeq:XP_022152582.1};	Mitochondrial F1F0-ATP synthase, subunit OSCP/ATP5	GO:0005743,mitochondrial inner membrane; GO:0046933,proton-transporting ATP synthase activity, rotational mechanism; GO:0003674,molecular_function; GO:0003824,catalytic activity; GO:0005215,transporter activity; GO:0005216,ion channel activity; GO:0005261,cation channel activity; GO:0008324,cation transmembrane transporter activity; GO:0015075,ion transmembrane transporter activity; GO:0015078,pr…	PF00213.21:ATP synthase delta (OSCP) subunit
203	MELO3C031008.2	1.3605	1.2926	1.0794	3.0458	2.2806	2.4169	0.7083	0.5481	0.3402	0.7291	0.8808	0.4958	chr04	31890691	31896769	+	--	--	F-box/LRR-repeat protein At1g67190-like [Momordica charantia]	FBL34_ARATH RecName: Full=F-box/LRR-repeat protein At1g67190;	A0A6J1CTB9_MOMCH SubName: Full=F-box/LRR-repeat protein At1g67190-like {ECO:0000313|RefSeq:XP_022144792.1, ECO:0000313|RefSeq:XP_022144793.1};	--	GO:0005737,cytoplasm; GO:0005575,cellular_component; GO:0005622,intracellular anatomical structure; GO:0110165,cellular anatomical entity	--
204	MELO3C031125.2	7.1106	7.232	6.588	8.5418	10.1209	11.2795	0	0	0	0	0	0	chr05	8830792	8836109	+	K08472 mlo protein | (RefSeq) MLO-like protein 4 (A)	--	mildew resistance protein [Cucumis melo var. makuwa]	MLO4_ARATH RecName: Full=MLO-like protein 4; Short=AtMlo4;	A0A5A7SVY6_CUCME SubName: Full=Mildew resistance protein {ECO:0000313|EMBL:KAA0033339.1};	--	GO:0016021,integral component of membrane; GO:0005516,calmodulin binding; GO:0006952,defense response; GO:0009607,response to biotic stimulus; GO:0003674,molecular_function; GO:0005488,binding; GO:0005515,protein binding; GO:0006950,response to stress; GO:0008150,biological_process; GO:0050896,response to stimulus; GO:0005575,cellular_component; GO:0016020,membrane; GO:0031224,intrinsic component…	PF03094.18:Mlo family
205	MELO3C031323.2	0.549	0.3049	0.4201	0.7125	0.7426	0.6306	0	0	0	0	0	0	chr05	25743248	25751914	+	--	--	LOW QUALITY PROTEIN: disease resistance protein RUN1-like [Cucumis melo]	RPV1_VITRO RecName: Full=Disease resistance protein RPV1 {ECO:0000305}; AltName: Full=NAD(+) hydrolase RPV1; EC=3.2.2.6 {ECO:0000305|PubMed:31439792}; AltName: Full=Resistance to Plasmopara viticola protein {ECO:0000303|PubMed:24033846}; Short=MrRVP1 {ECO:0000303|PubMed:24033846};	A0A1S3BZ02_CUCME SubName: Full=LOW QUALITY PROTEIN: disease resistance protein RPP4-like {ECO:0000313|RefSeq:XP_008454602.1};	--	GO:0005737,cytoplasm; GO:0005634,nucleus; GO:0043531,ADP binding; GO:0050135,NAD(P)+ nucleosidase activity; GO:0061809,NAD+ nucleotidase, cyclic ADP-ribose generating; GO:0042803,protein homodimerization activity; GO:0050832,defense response to fungus; GO:0043068,positive regulation of programmed cell death; GO:0007165,signal transduction; GO:0000166,nucleotide binding; GO:0003674,molecular_funct…	PF20160.2:C-JID domain
206	MELO3C031544.2	9.2767	6.7431	7.3727	8.2508	6.5935	6.286	4.6435	1.9182	1.1544	3.8257	3.4488	2.4017	chr05	25965140	25966186	+	K23541 Ca2+/H+ antiporter, TMEM165/GDT1 family | (RefSeq) putative pentatricopeptide repeat-containing protein At3g23330 (A)	--	selenium binding protein-like protein [Cucumis melo subsp. melo]	PP214_ARATH RecName: Full=Putative pentatricopeptide repeat-containing protein At3g05240;	A0A5A7TWI8_CUCME SubName: Full=Putative pentatricopeptide repeat-containing protein {ECO:0000313|EMBL:KAA0047953.1};	FOG: PPR repeat	GO:0005739,mitochondrion; GO:0080156,mitochondrial mRNA modification; GO:0000959,mitochondrial RNA metabolic process; GO:0006139,nucleobase-containing compound metabolic process; GO:0006725,cellular aromatic compound metabolic process; GO:0006807,nitrogen compound metabolic process; GO:0008150,biological_process; GO:0008152,metabolic process; GO:0009451,RNA modification; GO:0009987,cellular proce…	PF13041.9:PPR repeat family
207	MELO3C031582.2	2.7527	1.6708	1.9913	2.1876	1.7905	1.8273	0.6355	0.8576	0.4711	0.4874	0.3535	0.1707	chr05	28991231	28994181	+	--	--	uncharacterized protein LOC103498457 isoform X1 [Cucumis melo]	TET2_ARATH RecName: Full=Tetraspanin-2;	A0A5A7V3P9_CUCME SubName: Full=Methyltransferase type 11 {ECO:0000313|EMBL:KAA0061497.1};	--	GO:0016021,integral component of membrane; GO:0009506,plasmodesma; GO:0009734,auxin-activated signaling pathway; GO:0007154,cell communication; GO:0007165,signal transduction; GO:0008150,biological_process; GO:0009719,response to endogenous stimulus; GO:0009725,response to hormone; GO:0009733,response to auxin; GO:0009755,hormone-mediated signaling pathway; GO:0009987,cellular process; GO:0010033…	--
208	MELO3C031662.2	2.8139	2.0477	2.3194	1.8652	1.7405	2.3264	1.3794	0.9343	1.0501	0.8578	1.1922	0.6509	chr06	3154866	3159510	+	--	--	hypothetical protein Csa_009957 [Cucumis sativus]	--	A0A0A0L534_CUCSA SubName: Full=Uncharacterized protein {ECO:0000313|EMBL:KGN56858.1};	--	--	--
209	MELO3C031734.2	100.522	119.862	119.483	29.8764	49.5049	31.4426	12.9079	27.8513	38.0372	1.0686	7.6017	1.6435	chr06	4977123	4979002	-	K15382 solute carrier family 50 (sugar transporter) | (RefSeq) bidirectional sugar transporter SWEET16-like (A)	--	bidirectional sugar transporter SWEET17 [Cucumis melo]	SWT17_ARATH RecName: Full=Bidirectional sugar transporter SWEET17 {ECO:0000303|PubMed:21107422}; Short=AtSWEET17 {ECO:0000303|PubMed:21107422}; AltName: Full=Protein SUGARS WILL EVENTUALLY BE EXPORTED TRANSPORTERS 17 {ECO:0000303|PubMed:21107422};	A0A5D3CWA5_CUCME RecName: Full=Bidirectional sugar transporter SWEET {ECO:0000256|RuleBase:RU910715};	Multitransmembrane protein	GO:0016021,integral component of membrane; GO:0009705,plant-type vacuole membrane; GO:0005353,fructose transmembrane transporter activity; GO:0051119,sugar transmembrane transporter activity; GO:0008643,carbohydrate transport; GO:0070417,cellular response to cold; GO:0006995,cellular response to nitrogen starvation; GO:0007623,circadian rhythm; GO:1902334,fructose export from vacuole to cytoplasm…	PF03083.19:Sugar efflux transporter for intercellular exchange
210	MELO3C031820.2	0.4009	0.3072	0.5198	0.3331	0.5017	0.5577	0.1662	0.02	0.0924	0.2531	0.1228	0.1395	chr06	22072101	22082966	-	--	--	hypothetical protein Csa_017616 [Cucumis sativus]	--	A0A0A0L8A5_CUCSA SubName: Full=Uncharacterized protein {ECO:0000313|EMBL:KGN58180.1};	--	--	--
211	MELO3C031896.2	19.3933	15.9752	14.2236	20.6217	24.4285	23.4721	0	0	0	0	0	0	chr06	10177268	10182495	+	K15436 transportin-3 | (RefSeq) transportin-3 (A)	ko03013: Nucleocytoplasmic transport; ko03250: Viral life cycle - HIV-1	uncharacterized protein LOC127150081 isoform X3 [Cucumis melo]	MOS14_ARATH RecName: Full=Transportin MOS14 {ECO:0000305}; AltName: Full=Importin beta MOS14 {ECO:0000305}; AltName: Full=Protein MODIFIER OF SNC1 14 {ECO:0000303|PubMed:21738492}; AltName: Full=Transportin-SR {ECO:0000303|PubMed:21738492}; Short=TRN-SR {ECO:0000303|PubMed:21738492};	A0A438KBS2_VITVI SubName: Full=Transportin MOS14 {ECO:0000313|EMBL:RVX18666.1};	Nuclear transport regulator	GO:0005737,cytoplasm; GO:0005634,nucleus; GO:0031267,small GTPase binding; GO:0006606,protein import into nucleus; GO:0043484,regulation of RNA splicing; GO:0003674,molecular_function; GO:0005488,binding; GO:0005515,protein binding; GO:0019899,enzyme binding; GO:0051020,GTPase binding; GO:0006810,transport; GO:0006811,ion transport; GO:0006820,anion transport; GO:0006886,intracellular protein tra…	--
212	MELO3C031972.2	7.5718	5.2948	5.4964	19.4081	14.4571	19.6872	0.9741	0.5135	0.6769	8.8997	2.4655	2.678	chr06	36839006	36845090	+	--	--	protein BUNDLE SHEATH DEFECTIVE 2, chloroplastic-like [Cucumis melo]	--	A0A5A7V544_CUCME SubName: Full=Chaperone protein DnaJ-like {ECO:0000313|EMBL:KAA0061606.1};	--	--	--
213	MELO3C032225.2	4.5547	3.4046	3.8055	4.372	5.0402	5.9278	0	0	0	0	0	0	chr06	29530653	29537593	-	--	--	hypothetical protein IFM89_022310 [Coptis chinensis]	STY17_ARATH RecName: Full=Serine/threonine-protein kinase STY17 {ECO:0000305}; EC=2.7.11.1 {ECO:0000269|PubMed:17090544}; AltName: Full=Serine/threonine/tyrosine-protein kinase 17 {ECO:0000303|PubMed:16429265};	A0A835I4L2_9MAGN SubName: Full=Uncharacterized protein {ECO:0000313|EMBL:KAF9610399.1};	--	GO:0005829,cytosol; GO:0005524,ATP binding; GO:0106310,protein serine kinase activity; GO:0004674,protein serine/threonine kinase activity; GO:0004712,protein serine/threonine/tyrosine kinase activity; GO:0009658,chloroplast organization; GO:0006468,protein phosphorylation; GO:0000166,nucleotide binding; GO:0003674,molecular_function; GO:0005488,binding; GO:0017076,purine nucleotide binding; GO:0…	--
214	MELO3C032309.2	2.2428	3.3009	3.1699	0.7951	1.6215	1.182	1.3559	1.2882	1.3496	0.4457	0.4848	0.6504	chr07	1801579	1805596	+	K16296 serine carboxypeptidase-like clade I [EC:3.4.16.-] | (RefSeq) serine carboxypeptidase-like 13 (A)	--	serine carboxypeptidase-like 13 [Cucumis melo]	SCP18_ARATH RecName: Full=Serine carboxypeptidase-like 18; EC=3.4.16.-; Flags: Precursor;	A0A1S3BUB6_CUCME SubName: Full=serine carboxypeptidase-like 13 {ECO:0000313|RefSeq:XP_008452662.1};	Serine carboxypeptidases (lysosomal cathepsin A)	GO:0005576,extracellular region; GO:0016747,transferase activity, transferring acyl groups other than amino-acyl groups; GO:0004185,serine-type carboxypeptidase activity; GO:0006508,proteolysis; GO:0019748,secondary metabolic process; GO:0003674,molecular_function; GO:0003824,catalytic activity; GO:0016740,transferase activity; GO:0016746,transferase activity, transferring acyl groups; GO:0004180…	PF00450.25:Serine carboxypeptidase
215	MELO3C032410.2	1.0822	2.4286	2.5597	2.266	4.3334	4.1297	0	0	0	0	0	0	chr07	2783115	2784249	-	K08245 phytepsin [EC:3.4.23.40] | (RefSeq) aspartic proteinase (A)	--	aspartic proteinase-like isoform X3 [Cucumis melo]	ASPR_CUCPE RecName: Full=Aspartic proteinase; EC=3.4.23.-; Flags: Precursor;	A1BQJ2_CUCSA SubName: Full=Aspartic proteinase {ECO:0000313|EMBL:ABK55693.1}; Flags: Fragment;	Aspartyl protease	GO:0005773,vacuole; GO:0004190,aspartic-type endopeptidase activity; GO:0006629,lipid metabolic process; GO:0006508,proteolysis; GO:0003674,molecular_function; GO:0003824,catalytic activity; GO:0004175,endopeptidase activity; GO:0008233,peptidase activity; GO:0016787,hydrolase activity; GO:0070001,aspartic-type peptidase activity; GO:0140096,catalytic activity, acting on a protein; GO:0008150,bio…	PF00026.26:Eukaryotic aspartyl protease
216	MELO3C032437.2	2.312	2.9243	1.7243	5.5607	5.9816	3.9612	0	0.0351	0	0	0	0	chr07	3525834	3539778	+	--	--	uncharacterized protein LOC103493447 [Cucumis melo]	--	A0A1S3BTS8_CUCME SubName: Full=5'-nucleotidase domain-containing protein DDB_G0275467-like {ECO:0000313|RefSeq:XP_008452398.1, ECO:0000313|RefSeq:XP_008452399.1};	Similar to IMP-GMP specific 5'-nucleotidase	GO:0016787,hydrolase activity; GO:0046872,metal ion binding; GO:0003674,molecular_function; GO:0003824,catalytic activity; GO:0005488,binding; GO:0043167,ion binding; GO:0043169,cation binding	PF05761.17:5' nucleotidase family
217	MELO3C032627.2	0.7257	1.0083	0.9096	1.1688	1.4668	1.3935	0.2603	0.2509	0	0.2936	0.4525	0.3788	chr07	8890562	8893565	+	K15196 transcription factor IIIB 90 kDa subunit | (RefSeq) transcription factor IIIB 60 kDa subunit (A)	--	hypothetical protein Csa_012863 [Cucumis sativus]	--	A0A0A0L0J7_CUCSA RecName: Full=BRF1 domain-containing protein {ECO:0000259|Pfam:PF07741};	Transcription initiation factor TFIIIB, Brf1 subunit	GO:0005634,nucleus; GO:0097550,transcription preinitiation complex; GO:0017025,TBP-class protein binding; GO:0006352,DNA-templated transcription, initiation; GO:0070897,transcription preinitiation complex assembly; GO:0003674,molecular_function; GO:0005488,binding; GO:0005515,protein binding; GO:0008134,transcription factor binding; GO:0140296,general transcription initiation factor binding; GO:0…	PF07741.16:Brf1-like TBP-binding domain
218	MELO3C032784.2	1.6507	2.0007	1.3635	2.0574	2.9508	2.8384	0.4582	0.3092	0.5435	0	0.0956	0.1846	chr07	20292423	20293518	+	--	--	--	--	--	--	--	--
219	MELO3C033058.2	4.3606	3.4259	3.0824	7.0842	7.3381	6.1034	0.1096	0.2957	0.9421	4.6271	2.0415	3.0316	chr08	6999393	7002407	-	--	--	WAT1-related protein At5g64700-like isoform X1 [Cucumis melo]	WTR45_ARATH RecName: Full=WAT1-related protein At5g64700;	A0A1S3B374_CUCME RecName: Full=WAT1-related protein {ECO:0000256|RuleBase:RU363077};	--	GO:0016021,integral component of membrane; GO:0005886,plasma membrane; GO:0022857,transmembrane transporter activity; GO:0003674,molecular_function; GO:0005215,transporter activity; GO:0005575,cellular_component; GO:0016020,membrane; GO:0031224,intrinsic component of membrane; GO:0110165,cellular anatomical entity; GO:0071944,cell periphery	PF00892.23:EamA-like transporter family
220	MELO3C033157.2	4.2644	5.9704	4.8841	6.4451	12.7225	3.4099	0	0	0	0	0	0	chr08	9901284	9905745	+	K01754 threonine dehydratase [EC:4.3.1.19] | (RefSeq) threonine dehydratase biosynthetic, chloroplastic (A)	ko00260: Glycine, serine and threonine metabolism; ko00290: Valine, leucine and isoleucine biosynthesis; ko01100: Metabolic pathways; ko01110: Biosynthesis of secondary metabolites; ko01200: Carbon metabolism; ko01230: Biosynthesis of amino acids	threonine dehydratase biosynthetic [Cucumis melo var. makuwa]	THD1_ARATH RecName: Full=Threonine dehydratase biosynthetic, chloroplastic; EC=4.3.1.19; AltName: Full=Threonine deaminase; Short=TD; Flags: Precursor;	A0A1S4E3R7_CUCME SubName: Full=threonine dehydratase biosynthetic, chloroplastic-like {ECO:0000313|RefSeq:XP_016902876.1};	Threonine/serine dehydratases	GO:0009507,chloroplast; GO:0003941,L-serine ammonia-lyase activity; GO:0004794,L-threonine ammonia-lyase activity; GO:0030170,pyridoxal phosphate binding; GO:0009097,isoleucine biosynthetic process; GO:0006565,L-serine catabolic process; GO:0006567,threonine catabolic process; GO:0003674,molecular_function; GO:0003824,catalytic activity; GO:0016829,lyase activity; GO:0016840,carbon-nitrogen lyase…	PF00585.21:C-terminal regulatory domain of Threonine dehydratase
221	MELO3C033230.2	5.3848	3.9494	3.5946	10.9529	9.5344	11.5897	1.6951	0.7262	0.5584	1.6995	1.644	1.4335	chr08	13473793	13482036	-	--	--	putative transcription factor PosF21 isoform X1 [Cucumis melo var. makuwa]	POF21_ARATH RecName: Full=Probable transcription factor PosF21; AltName: Full=bZIP transcription factor 59; Short=AtbZIP59;	A0A5D3DWD4_CUCME SubName: Full=Putative transcription factor PosF21 isoform X1 {ECO:0000313|EMBL:TYK27814.1};	--	GO:0005737,cytoplasm; GO:0005829,cytosol; GO:0005634,nucleus; GO:0003700,DNA-binding transcription factor activity; GO:0000976,transcription regulatory region sequence-specific DNA binding; GO:0003674,molecular_function; GO:0140110,transcription regulator activity; GO:0001067,regulatory region nucleic acid binding; GO:0003676,nucleic acid binding; GO:0003677,DNA binding; GO:0003690,double-strande…	--
222	MELO3C033276.2	8.9276	7.9334	6.658	8.954	7.6885	8.7989	0.049	0	0.0363	0	0.017	0	chr08	16838835	16844522	-	--	--	uncharacterized protein LOC103499968 isoform X1 [Cucumis melo]	--	A0A1S3CE76_CUCME SubName: Full=uncharacterized protein LOC103499968 isoform X2 {ECO:0000313|RefSeq:XP_008461368.1};	Phosphoprotein/predicted coiled-coil protein	GO:0016021,integral component of membrane; GO:0048583,regulation of response to stimulus; GO:0006355,regulation of transcription, DNA-templated; GO:0008150,biological_process; GO:0050789,regulation of biological process; GO:0050896,response to stimulus; GO:0065007,biological regulation; GO:0006139,nucleobase-containing compound metabolic process; GO:0006351,transcription, DNA-templated; GO:000672…	PF10252.12:Casein kinase substrate phosphoprotein PP28
223	MELO3C033353.2	18.7257	20.1969	16.598	27.0046	29.5983	27.121	0	0	0	0.0622	0	0	chr08	21629400	21634348	-	K02868 large subunit ribosomal protein L11e | (RefSeq) 60S ribosomal protein L11-1-like (A)	ko03010: Ribosome	uncharacterized protein LOC103486128 isoform X3 [Cucumis melo]	RL11_MEDSA RecName: Full=60S ribosomal protein L11; AltName: Full=L5;	A0A1S3B5X8_CUCME SubName: Full=uncharacterized protein LOC103486128 isoform X4 {ECO:0000313|RefSeq:XP_008442204.1};	60S ribosomal protein L11	GO:0005737,cytoplasm; GO:0005634,nucleus; GO:0005840,ribosome; GO:0019843,rRNA binding; GO:0003735,structural constituent of ribosome; GO:0006412,translation; GO:0003674,molecular_function; GO:0003676,nucleic acid binding; GO:0003723,RNA binding; GO:0005488,binding; GO:0097159,organic cyclic compound binding; GO:1901363,heterocyclic compound binding; GO:0005198,structural molecule activity; GO:00…	--
224	MELO3C033373.2	15.6333	16.7748	13.1802	12.7326	12.2991	11.2613	0	0	0	0	0	0	chr08	23426565	23429866	+	--	--	pre-mRNA-splicing factor CWC25-like protein [Cucumis melo var. makuwa]	--	A0A5D3DE30_CUCME SubName: Full=Pre-mRNA-splicing factor CWC25-like protein {ECO:0000313|EMBL:TYK21842.1};	--	--	--
225	MELO3C033450.2	2.5961	3.0237	2.3801	3.2959	3.2297	2.3416	0	0	0	0	0	0	chr08	29494517	29497872	-	--	--	beta-galactosidase-like [Cucumis melo var. makuwa]	BPA1_ARATH RecName: Full=Binding partner of ACD11 1 {ECO:0000303|PubMed:18845362};	A0A5A7UEN2_CUCME RecName: Full=Beta-galactosidase {ECO:0000256|ARBA:ARBA00012756}; EC=3.2.1.23 {ECO:0000256|ARBA:ARBA00012756};	--	GO:0005886,plasma membrane; GO:0009536,plastid; GO:0003723,RNA binding; GO:0050832,defense response to fungus; GO:0034051,negative regulation of plant-type hypersensitive response; GO:0003674,molecular_function; GO:0003676,nucleic acid binding; GO:0005488,binding; GO:0097159,organic cyclic compound binding; GO:1901363,heterocyclic compound binding; GO:0006950,response to stress; GO:0006952,defens…	PF08777.14:RNA binding motif
226	MELO3C033500.2	36.4698	24.2146	28.7213	21.9932	21.9552	21.7222	0	0	0	0	0	0	chr08	33715193	33718750	-	K13950 para-aminobenzoate synthetase [EC:2.6.1.85] | (RefSeq) aminodeoxychorismate synthase, chloroplastic (A)	ko00790: Folate biosynthesis; ko01240: Biosynthesis of cofactors	aminodeoxychorismate synthase [Cucumis melo var. makuwa]	ADCS_ORYSJ RecName: Full=Probable aminodeoxychorismate synthase, chloroplastic; Short=ADC synthase; EC=2.6.1.85; AltName: Full=P-aminobenzoic acid synthase; Short=PABA synthase; AltName: Full=Para-aminobenzoate synthase; Flags: Precursor;	A0A5A7T055_CUCME RecName: Full=Aminodeoxychorismate synthase {ECO:0000256|ARBA:ARBA00013139}; EC=2.6.1.85 {ECO:0000256|ARBA:ARBA00013139}; AltName: Full=Para-aminobenzoate synthase {ECO:0000256|ARBA:ARBA00031329}; AltName: Full=p-aminobenzoic acid synthase {ECO:0000256|ARBA:ARBA00031904};	Para-aminobenzoate (PABA) synthase ABZ1	GO:0009507,chloroplast; GO:0005737,cytoplasm; GO:0046820,4-amino-4-deoxychorismate synthase activity; GO:0046656,folic acid biosynthetic process; GO:0006541,glutamine metabolic process; GO:0008153,para-aminobenzoic acid biosynthetic process; GO:0046654,tetrahydrofolate biosynthetic process; GO:0003674,molecular_function; GO:0003824,catalytic activity; GO:0008483,transaminase activity; GO:0016740,…	--
227	MELO3C033898.2	2.3836	2.2597	2.79	3.1975	3.4132	3.7992	0	0.1381	0.1699	0.0776	0.1593	0.1154	chr09	13329003	13333222	-	--	--	putative transposase [Cucumis melo var. makuwa]	TRA1_MAIZE RecName: Full=Putative AC transposase; AltName: Full=ORFA;	A0A5A7SW63_CUCME SubName: Full=Putative transposase {ECO:0000313|EMBL:KAA0034838.1};	Tam3-transposase (Ac family)	GO:0003677,DNA binding; GO:0046983,protein dimerization activity; GO:0006310,DNA recombination; GO:0032196,transposition; GO:0003674,molecular_function; GO:0003676,nucleic acid binding; GO:0005488,binding; GO:0097159,organic cyclic compound binding; GO:1901363,heterocyclic compound binding; GO:0005515,protein binding; GO:0006139,nucleobase-containing compound metabolic process; GO:0006259,DNA met…	PF05699.17:hAT family C-terminal dimerisation region
228	MELO3C033988.2	22.0595	30.0954	29.651	3.2829	8.0339	8.2391	5.3315	8.3867	5.8172	1.3278	2.3722	1.604	chr09	21588384	21589685	+	--	--	hypothetical protein E6C27_scaffold231G00360 [Cucumis melo var. makuwa]	--	A0A5A7UIN4_CUCME SubName: Full=Uncharacterized protein {ECO:0000313|EMBL:KAA0055110.1};	--	--	--
229	MELO3C034180.2	38.9749	31.2022	33.4489	12.8509	18.4536	15.9883	11.1735	13.3	15.7434	3.6505	9.4254	3.4284	chr10	13158060	13161148	-	K14638 solute carrier family 15 (peptide/histidine transporter), member 3/4 | (RefSeq) protein NRT1/ PTR FAMILY 8.3 (A)	--	protein NRT1/ PTR FAMILY 5.1 [Cucumis melo]	PTR30_ARATH RecName: Full=Protein NRT1/ PTR FAMILY 5.1; Short=AtNPF5.1;	A0A1S3C5L1_CUCME SubName: Full=protein NRT1/ PTR FAMILY 5.1 {ECO:0000313|RefSeq:XP_008456928.1};	H+/oligopeptide symporter	GO:0016021,integral component of membrane; GO:0071916,dipeptide transmembrane transporter activity; GO:0042937,tripeptide transmembrane transporter activity; GO:0009624,response to nematode; GO:0003674,molecular_function; GO:0005215,transporter activity; GO:0008509,anion transmembrane transporter activity; GO:0015075,ion transmembrane transporter activity; GO:0022857,transmembrane transporter act…	PF00854.24:POT family
230	MELO3C034386.2	14.4739	12.0919	12.2794	22.5339	22.8777	32.5565	0	0	0	0.1336	0	0	chr10	14285895	14290154	-	K01919 glutamate--cysteine ligase [EC:6.3.2.2] | (RefSeq) glutamate--cysteine ligase, chloroplastic (A)	ko00270: Cysteine and methionine metabolism; ko00480: Glutathione metabolism; ko01100: Metabolic pathways; ko01240: Biosynthesis of cofactors	unnamed protein product, partial [Nymphaea colorata]	GSH1_TOBAC RecName: Full=Glutamate--cysteine ligase, chloroplastic; EC=6.3.2.2; AltName: Full=Gamma-ECS; Short=GCS; AltName: Full=Gamma-glutamylcysteine synthetase; Flags: Precursor;	A0A5K0YGC0_9MAGN SubName: Full=Uncharacterized protein {ECO:0000313|EMBL:VVV77151.1}; Flags: Fragment;	--	GO:0009507,chloroplast; GO:0005524,ATP binding; GO:0004357,glutamate-cysteine ligase activity; GO:0006750,glutathione biosynthetic process; GO:0000166,nucleotide binding; GO:0003674,molecular_function; GO:0005488,binding; GO:0017076,purine nucleotide binding; GO:0030554,adenyl nucleotide binding; GO:0032553,ribonucleotide binding; GO:0032555,purine ribonucleotide binding; GO:0032559,adenyl ribonu…	--
231	MELO3C034445.2	14.3178	14.6941	13.5743	12.4037	11.7102	12.9523	0	0.0425	0.0436	0.0199	0.0102	0	chr10	18504177	18509190	-	--	--	uncharacterized protein E6C27_scaffold60G002600 [Cucumis melo var. makuwa]	--	A0A5D3DCW3_CUCME SubName: Full=Uncharacterized protein {ECO:0000313|EMBL:TYK21412.1};	--	--	PF02992.17:Transposase family tnp2
232	MELO3C034486.2	3.8658	6.9825	3.2511	13.009	14.7539	12.546	1.5775	2.5342	1.0022	5.7954	6.9457	6.8606	chr10	21975010	21975751	-	--	--	--	--	--	--	--	--
233	MELO3C034694.2	6.1433	6.0206	4.7224	4.3459	4.1475	5.0054	0	0.0091	0	0	0	0	chr11	11019768	11024357	+	K09060 plant G-box-binding factor | (RefSeq) G-box-binding factor 1 (A)	--	G-box-binding factor 1-like [Cucumis melo var. makuwa]	GBF1_ARATH RecName: Full=G-box-binding factor 1; Short=AtGBF1; AltName: Full=bZIP transcription factor 41; Short=AtbZIP41;	A0A5D3CDJ9_CUCME SubName: Full=G-box-binding factor 1-like {ECO:0000313|EMBL:TYK09605.1};	--	GO:0005737,cytoplasm; GO:0005634,nucleus; GO:0003700,DNA-binding transcription factor activity; GO:0043565,sequence-specific DNA binding; GO:0000976,transcription regulatory region sequence-specific DNA binding; GO:0006355,regulation of transcription, DNA-templated; GO:0003674,molecular_function; GO:0140110,transcription regulator activity; GO:0003676,nucleic acid binding; GO:0003677,DNA binding;…	PF01699.27:Sodium/calcium exchanger protein
234	MELO3C034995.2	3.582	3.2677	2.9932	7.8758	9.8839	9.3354	2.2487	1.5138	0.8467	5.0728	3.896	4.6024	chr11	14029777	14032112	+	K11886 proteasome component ECM29 | (RefSeq) proteasome-associated protein ECM29 homolog (A)	--	hypothetical protein E5676_scaffold177G001590 [Cucumis melo var. makuwa]	--	A0A5D3CLC9_CUCME SubName: Full=Uncharacterized protein {ECO:0000313|EMBL:TYK11974.1};	Uncharacterized conserved protein	--	--
235	MELO3C035154.2	6.967	5.397	4.8543	15.509	13.6852	15.2302	0	0.078	0	0	0	0	chr11	26099637	26107817	-	K15272 solute carrier family 35 (UDP-sugar transporter), member A1/2/3 | (RefSeq) CMP-sialic acid transporter 4 (A)	--	uncharacterized protein LOC127150354 [Cucumis melo]	CSTR2_ORYSI RecName: Full=CMP-sialic acid transporter 2 {ECO:0000305}; Short=CMP-SA-Tr 2 {ECO:0000305}; Short=CMP-Sia-Tr 2 {ECO:0000305}; AltName: Full=CMP-sialic acid transporter-like protein 2 {ECO:0000305};	A0A1S4E0K5_CUCME SubName: Full=uncharacterized protein LOC107991393 isoform X1 {ECO:0000313|RefSeq:XP_016901772.1};	Predicted UDP-galactose transporter	GO:0000139,Golgi membrane; GO:0016021,integral component of membrane; GO:0015165,pyrimidine nucleotide-sugar transmembrane transporter activity; GO:0008643,carbohydrate transport; GO:0003674,molecular_function; GO:0005215,transporter activity; GO:0005338,nucleotide-sugar transmembrane transporter activity; GO:0008509,anion transmembrane transporter activity; GO:0015075,ion transmembrane transport…	--
236	MELO3C035349.2	41.2268	31.668	32.2844	4.9816	3.7161	5.0588	2.5527	3.5075	7.2062	2.2421	0.2832	1.2401	chr12	6852071	6853968	-	K01674 carbonic anhydrase [EC:4.2.1.1] | (RefSeq) alpha carbonic anhydrase 7-like (A)	ko00910: Nitrogen metabolism; ko01100: Metabolic pathways	alpha carbonic anhydrase 7-like [Cucumis melo var. makuwa]	ATCA7_ARATH RecName: Full=Alpha carbonic anhydrase 7; Short=AtaCA7; Short=AtalphaCA7; EC=4.2.1.1; AltName: Full=Alpha carbonate dehydratase 7; Flags: Precursor;	A0A5D3CIB1_CUCME RecName: Full=Carbonic anhydrase {ECO:0000256|ARBA:ARBA00012925, ECO:0000256|RuleBase:RU367011}; EC=4.2.1.1 {ECO:0000256|ARBA:ARBA00012925, ECO:0000256|RuleBase:RU367011};	Carbonic anhydrase	GO:0009570,chloroplast stroma; GO:0004089,carbonate dehydratase activity; GO:0016836,hydro-lyase activity; GO:0008270,zinc ion binding; GO:0006730,one-carbon metabolic process; GO:0003674,molecular_function; GO:0003824,catalytic activity; GO:0016829,lyase activity; GO:0016835,carbon-oxygen lyase activity; GO:0005488,binding; GO:0043167,ion binding; GO:0043169,cation binding; GO:0046872,metal ion …	PF00194.24:Eukaryotic-type carbonic anhydrase
237	MELO3C035414.2	7.37	6.2536	5.3103	13.3434	15.3887	15.6101	3.6179	2.7542	3.0779	6.3437	6.574	6.9852	chr12	12199759	12205338	+	K10688 ubiquitin-conjugating enzyme E2 W [EC:2.3.2.25] | (RefSeq) probable ubiquitin-conjugating enzyme E2 16 (A)	ko04120: Ubiquitin mediated proteolysis	uncharacterized protein LOC103499968 isoform X1 [Cucumis melo]	FGT1_ARATH RecName: Full=Protein FORGETTER 1 {ECO:0000303|PubMed:27680998}; AltName: Full=Protein EMBRYO DEFECTIVE 1135 {ECO:0000303|PubMed:15266054};	A0A1S3CE76_CUCME SubName: Full=uncharacterized protein LOC103499968 isoform X2 {ECO:0000313|RefSeq:XP_008461368.1};	Nuclear helicase MOP-3/SNO (DEAD-box superfamily)	GO:0005634,nucleus; GO:0031490,chromatin DNA binding; GO:0042393,histone binding; GO:0046872,metal ion binding; GO:1990841,promoter-specific chromatin binding; GO:0006338,chromatin remodeling; GO:0010286,heat acclimation; GO:1900036,positive regulation of cellular response to heat; GO:0040029,regulation of gene expression, epigenetic; GO:0006355,regulation of transcription, DNA-templated; GO:0009…	PF10252.12:Casein kinase substrate phosphoprotein PP28
238	MELO3C035440.2	16.6254	14.6556	15.9137	16.9261	21.5703	25.3086	5.3049	2.5567	1.4116	13.7163	7.5653	11.4185	chr12	4826942	4831783	-	K17778 mitochondrial import inner membrane translocase subunit TIM10 | (RefSeq) mitochondrial import inner membrane translocase subunit TIM10 (A)	--	mitochondrial import inner membrane translocase subunit TIM10 [Helianthus annuus]	--	A0A251UAD6_HELAN SubName: Full=Putative tim10/DDP family zinc finger {ECO:0000313|EMBL:OTG19752.1};	--	GO:0005743,mitochondrial inner membrane; GO:0045039,protein insertion into mitochondrial inner membrane; GO:0006605,protein targeting; GO:0006626,protein targeting to mitochondrion; GO:0006810,transport; GO:0006811,ion transport; GO:0006820,anion transport; GO:0006839,mitochondrial transport; GO:0006886,intracellular protein transport; GO:0006996,organelle organization; GO:0007005,mitochondrion o…	--
239	MELO3C035473.2	5.915	5.8374	5.3703	6.6574	7.7941	7.4153	0.0348	0.0671	0.1549	0.1414	0.0726	0.0468	chr12	16895655	16898517	-	K22073 transferase CAF17, mitochondrial [EC:2.1.-.-] | (RefSeq) putative transferase At4g12130, mitochondrial (A)	--	putative transferase At4g12130, mitochondrial [Cucumis melo]	Y4121_ARATH RecName: Full=Putative transferase At4g12130, mitochondrial {ECO:0000305}; EC=2.1.-.- {ECO:0000305}; AltName: Full=Iron-sulfur cluster assembly factor homolog COG0354 {ECO:0000305}; Flags: Precursor;	A0A1S4E291_CUCME SubName: Full=putative transferase At4g12130, mitochondrial {ECO:0000313|RefSeq:XP_016902345.1, ECO:0000313|RefSeq:XP_016902346.1};	Transcription factor, component of CCR4 transcriptional complex	GO:0005829,cytosol; GO:0005759,mitochondrial matrix; GO:0016740,transferase activity; GO:0016226,iron-sulfur cluster assembly; GO:0003674,molecular_function; GO:0003824,catalytic activity; GO:0006790,sulfur compound metabolic process; GO:0008150,biological_process; GO:0008152,metabolic process; GO:0009987,cellular process; GO:0016043,cellular component organization; GO:0022607,cellular component …	--
240	novel.1005	5.2797	5.7252	5.6551	3.8738	4.3006	4.9028	0	0	0	0	0	0	chr08	23425741	23426000	.	--	--	--	--	--	--	--	--
241	novel.1011	8.498	5.3438	3.6726	2.0726	1.0069	1.2124	0.0313	0.005	0.0464	0.0776	0.0109	0.014	chr08	28886691	28892561	+	--	--	hypothetical protein E6C27_scaffold1290G00140 [Cucumis melo var. makuwa]	RNHX1_ARATH RecName: Full=Putative ribonuclease H protein At1g65750; EC=3.1.26.4;	A0A5A7V6K4_CUCME SubName: Full=Uncharacterized protein {ECO:0000313|EMBL:KAA0063733.1};	FOG: Reverse transcriptase	GO:0046872,metal ion binding; GO:0003676,nucleic acid binding; GO:0004523,RNA-DNA hybrid ribonuclease activity; GO:0003674,molecular_function; GO:0005488,binding; GO:0043167,ion binding; GO:0043169,cation binding; GO:0097159,organic cyclic compound binding; GO:1901363,heterocyclic compound binding; GO:0003824,catalytic activity; GO:0004518,nuclease activity; GO:0004519,endonuclease activity; GO:0…	--
242	novel.1013	2.858	2.2487	1.9717	2.1818	2.6822	2.7552	0	0	0	0	0	0	chr08	30288137	30289912	-	--	--	hypothetical protein E5676_scaffold1856G00080 [Cucumis melo var. makuwa]	--	A0A5D3BZ71_CUCME SubName: Full=Uncharacterized protein {ECO:0000313|EMBL:TYK04182.1};	--	GO:0016021,integral component of membrane; GO:0005575,cellular_component; GO:0016020,membrane; GO:0031224,intrinsic component of membrane; GO:0110165,cellular anatomical entity	--
243	novel.102	17.6353	14.9972	13.6244	14.4862	10.1822	11.8613	2.2769	2.9484	2.0116	4.7628	4.6688	5.8073	chr00	13376692	13378004	.	--	--	Ty3/gypsy retrotransposon protein [Cucumis melo var. makuwa]	--	A0A5A7UKN8_CUCME SubName: Full=Ty3/gypsy retrotransposon protein {ECO:0000313|EMBL:KAA0055700.1};	--	GO:0003676,nucleic acid binding; GO:0015074,DNA integration; GO:0003674,molecular_function; GO:0005488,binding; GO:0097159,organic cyclic compound binding; GO:1901363,heterocyclic compound binding; GO:0006139,nucleobase-containing compound metabolic process; GO:0006259,DNA metabolic process; GO:0006725,cellular aromatic compound metabolic process; GO:0006807,nitrogen compound metabolic process; G…	PF08284.14:Retroviral aspartyl protease
244	novel.1061	11.0253	15.0866	14.35	17.4059	12.8108	14.9792	4.7949	5.015	8.1669	7.7327	3.2625	7.2621	chr09	20603029	20603324	.	--	--	E3 ubiquitin-protein ligase RHA2B-like [Cucumis melo]	--	A0A0A0KUZ6_CUCSA SubName: Full=Uncharacterized protein {ECO:0000313|EMBL:KGN51526.1};	--	--	--
245	novel.1079	3.5247	4.6822	5.2458	2.3101	1.561	1.6313	0.6464	1.3352	1.2321	0.25	0.2247	0.124	chr10	3961160	3961813	.	--	--	--	--	--	--	--	--
246	novel.11	5.461	3.9071	3.383	7.2634	7.8707	7.5226	0.2274	0.2411	0.2697	0.5232	0.5849	0.5497	chr00	2940928	2942255	+	K05391 cyclic nucleotide gated channel, plant | (RefSeq) cyclic nucleotide-gated ion channel 1-like (A)	ko04626: Plant-pathogen interaction	cyclic nucleotide-gated ion channel 1-like isoform X1 [Cucumis melo var. makuwa]	--	A0A5D3E7N4_CUCME SubName: Full=Cyclic nucleotide-gated ion channel 1-like isoform X1 {ECO:0000313|EMBL:TYK31716.1};	--	GO:0016021,integral component of membrane; GO:0005216,ion channel activity; GO:0003674,molecular_function; GO:0005215,transporter activity; GO:0015075,ion transmembrane transporter activity; GO:0015267,channel activity; GO:0015318,inorganic molecular entity transmembrane transporter activity; GO:0022803,passive transmembrane transporter activity; GO:0022857,transmembrane transporter activity; GO:…	--
247	novel.1139	4.0924	3.0505	3.5663	1.651	1.0107	1.1811	2.574	1.7246	1.1168	0.3399	0.3928	0.2108	chr11	4298933	4300097	+	K14488 SAUR family protein | (RefSeq) auxin-responsive protein SAUR21-like (A)	ko04075: Plant hormone signal transduction	hypothetical protein Csa_006730 [Cucumis sativus]	A10A5_SOYBN RecName: Full=Auxin-induced protein 10A5;	A0A0A0LJ03_CUCSA SubName: Full=Uncharacterized protein {ECO:0000313|EMBL:KGN61885.1};	--	GO:0009734,auxin-activated signaling pathway; GO:0007154,cell communication; GO:0007165,signal transduction; GO:0008150,biological_process; GO:0009719,response to endogenous stimulus; GO:0009725,response to hormone; GO:0009733,response to auxin; GO:0009755,hormone-mediated signaling pathway; GO:0009987,cellular process; GO:0010033,response to organic substance; GO:0023052,signaling; GO:0032870,ce…	--
248	novel.1149	4.0729	3.8309	3.0554	11.8284	10.391	12.7981	0	0.0444	0	0	0	0.0619	chr11	7333123	7334017	-	--	--	putative disease resistance protein RGA3 [Cucumis sativus]	--	A0A0A0LNG8_CUCSA SubName: Full=Uncharacterized protein {ECO:0000313|EMBL:KGN63368.1};	--	GO:0043531,ADP binding; GO:0006952,defense response; GO:0051707,response to other organism; GO:0000166,nucleotide binding; GO:0003674,molecular_function; GO:0005488,binding; GO:0017076,purine nucleotide binding; GO:0030554,adenyl nucleotide binding; GO:0032553,ribonucleotide binding; GO:0032555,purine ribonucleotide binding; GO:0032559,adenyl ribonucleotide binding; GO:0036094,small molecule bind…	PF18052.4:Rx N-terminal domain
249	novel.1156	17.5366	18.827	21.3836	34.8889	33.0397	36.6957	1.4233	1.0197	1.0835	2.6034	4.1052	1.24	chr11	11061511	11063080	-	--	--	--	--	--	--	--	--
250	novel.1180	4.7642	3.1768	3.4243	6.043	5.5087	5.9633	0	0	0	0	0	0	chr11	23816803	23819531	-	--	--	RING-H2 finger protein ATL66 [Cucumis melo var. makuwa]	--	A0A5A7UGY0_CUCME SubName: Full=RING-H2 finger protein ATL66 {ECO:0000313|EMBL:KAA0054520.1};	--	--	--
251	novel.1207	37.4225	42.6838	49.8526	86.2323	60.5712	81.2052	1.3106	0.8422	0.8905	3.9912	4.1	7.6276	chr12	1763783	1766151	-	--	--	--	--	--	--	--	--
252	novel.1243	0.9738	0.6733	0.7948	1.4693	1.908	2.1752	0.3884	0.384	0.251	0.2696	0.4916	0.5484	chr12	20478500	20481619	+	--	--	L10-interacting MYB domain-containing protein-like [Cucumis melo var. makuwa]	--	A0A5A7V818_CUCME SubName: Full=L10-interacting MYB domain-containing protein-like {ECO:0000313|EMBL:KAA0063380.1};	Predicted transposase	GO:0004518,nuclease activity; GO:0003674,molecular_function; GO:0003824,catalytic activity; GO:0016787,hydrolase activity; GO:0016788,hydrolase activity, acting on ester bonds	PF13359.9:DDE superfamily endonuclease
253	novel.135	4.5205	2.5677	4.7074	3.827	0.4269	9.7644	0.3646	0.4793	0.1474	0.3589	0.8066	0.6233	chr00	15429951	15431017	-	K16871 4-aminobutyrate---pyruvate transaminase [EC:2.6.1.96] | (RefSeq) gamma-aminobutyrate transaminase POP2, mitochondrial-like (A)	ko00250: Alanine, aspartate and glutamate metabolism; ko00650: Butanoate metabolism; ko01100: Metabolic pathways	CACTA en-spm transposon protein [Cucumis melo var. makuwa]	--	A0A5A7VES4_CUCME SubName: Full=CACTA en-spm transposon protein {ECO:0000313|EMBL:KAA0064395.1};	--	--	PF03004.17:Plant transposase (Ptta/En/Spm family)
254	novel.157	16.3097	12.1397	14.021	13.5602	11.6264	15.4324	3.0285	2.5542	3.0219	2.4043	3.2594	4.5369	chr00	16877438	16878474	-	--	--	phosphatidate phosphatase PAH2-like isoform X3 [Cucumis melo var. makuwa]	--	A0A5A7SZM9_CUCME SubName: Full=Phosphatidate phosphatase PAH2-like isoform X3 {ECO:0000313|EMBL:KAA0034801.1};	--	--	--
255	novel.198	2.9814	2.8557	2.9383	4.0875	3.9638	6.0474	0.0724	0.2792	0	0	0.1007	0.0973	chr00	19237223	19237639	.	--	--	peptidyl-prolyl cis-trans isomerase FKBP16-1, chloroplastic isoform X2 [Cucumis melo]	--	A0A5D3CZ07_CUCME SubName: Full=Uncharacterized protein {ECO:0000313|EMBL:TYK17153.1};	--	--	--
256	novel.22	3.1652	1.9023	2.4466	4.3008	3.883	3.9841	0	0	0	0	0	0	chr00	4400620	4401871	.	--	--	uncharacterized protein LOC127148850 isoform X2 [Cucumis melo]	--	A0A5A7VBH7_CUCME SubName: Full=Uncharacterized protein {ECO:0000313|EMBL:KAA0065642.1};	--	--	--
257	novel.232	4.5811	4.4845	4.9316	15.482	14.6342	14.492	2.7732	1.3365	1.0659	5.4219	3.4276	3.104	chr00	21045188	21046149	-	K03526 (E)-4-hydroxy-3-methylbut-2-enyl-diphosphate synthase [EC:1.17.7.1 1.17.7.3] | (RefSeq) 4-hydroxy-3-methylbut-2-en-1-yl diphosphate synthase (ferredoxin), chloroplastic (A)	ko00900: Terpenoid backbone biosynthesis; ko01100: Metabolic pathways; ko01110: Biosynthesis of secondary metabolites	putative transferase [Cucumis melo var. makuwa]	ISPG_ARATH RecName: Full=4-hydroxy-3-methylbut-2-en-1-yl diphosphate synthase (ferredoxin), chloroplastic; EC=1.17.7.1 {ECO:0000269|PubMed:15650872}; AltName: Full=1-hydroxy-2-methyl-2-(E)-butenyl 4-diphosphate synthase; AltName: Full=Protein CHLOROPLAST BIOGENESIS 4; AltName: Full=Protein CONSTITUTIVE SUBTILISIN 3; Flags: Precursor;	A0A5A7TEL2_CUCME SubName: Full=Putative transferase {ECO:0000313|EMBL:KAA0039669.1};	--	GO:0009507,chloroplast; GO:0009941,chloroplast envelope; GO:0009570,chloroplast stroma; GO:0009536,plastid; GO:0051539,4 iron, 4 sulfur cluster binding; GO:0046429,4-hydroxy-3-methylbut-2-en-1-yl diphosphate synthase activity; GO:0005506,iron ion binding; GO:0019288,isopentenyl diphosphate biosynthetic process, methylerythritol 4-phosphate pathway; GO:0009617,response to bacterium; GO:0009862,sys…	PF04551.17:GcpE protein
258	novel.272	1.3271	1.3801	0.4534	1.0917	1.1624	1.7275	0.4642	0.2734	0.1147	0.6981	0.5199	0.5542	chr00	23067344	23068514	+	--	--	--	--	--	--	--	--
259	novel.287	1.5609	1.9623	2.3459	1.4226	1.9684	2.1266	0.853	0.8496	0.9274	0.8082	0.4744	0.5347	chr00	23978681	23980294	-	--	--	pol protein [Cucumis melo var. makuwa]	RRPO_OENBE RecName: Full=RNA-directed DNA polymerase homolog; EC=2.7.7.48; AltName: Full=Reverse transcriptase homolog;	A0A5A7UIB4_CUCME SubName: Full=Pol protein {ECO:0000313|EMBL:KAA0053301.1};	FOG: Transposon-encoded proteins with TYA, reverse transcriptase, integrase domains in various combinations	GO:0005739,mitochondrion; GO:0003968,RNA-directed 5'-3' RNA polymerase activity; GO:0003964,RNA-directed DNA polymerase activity; GO:0003674,molecular_function; GO:0003824,catalytic activity; GO:0016740,transferase activity; GO:0016772,transferase activity, transferring phosphorus-containing groups; GO:0016779,nucleotidyltransferase activity; GO:0034062,5'-3' RNA polymerase activity; GO:0097747,R…	PF17919.4:RNase H-like domain found in reverse transcriptase
260	novel.32	9.8526	9.8499	10.9947	18.8422	18.2988	16.9594	0.8818	0.9896	1.0744	2.109	2.9307	1.087	chr00	5790969	5793468	+	--	--	hypothetical protein E5676_scaffold287G00880 [Cucumis melo var. makuwa]	CSLH3_ORYSJ RecName: Full=Putative cellulose synthase-like protein H3; EC=2.4.1.-; AltName: Full=OsCslH3;	A0A5D3C4I3_CUCME SubName: Full=Uncharacterized protein {ECO:0000313|EMBL:TYK06224.1};	--	GO:0000139,Golgi membrane; GO:0016021,integral component of membrane; GO:0005886,plasma membrane; GO:0016760,cellulose synthase (UDP-forming) activity; GO:0051753,mannan synthase activity; GO:0071555,cell wall organization; GO:0030244,cellulose biosynthetic process; GO:0009833,plant-type primary cell wall biogenesis; GO:0003674,molecular_function; GO:0003824,catalytic activity; GO:0008194,UDP-gly…	--
261	novel.33	5.2647	3.0103	3.6568	4.148	3.5292	4.8868	0.749	0.5987	0.3521	0.3462	0.9017	1.1041	chr00	5882223	5883875	.	K16871 4-aminobutyrate---pyruvate transaminase [EC:2.6.1.96] | (RefSeq) gamma-aminobutyrate transaminase POP2, mitochondrial-like (A)	ko00250: Alanine, aspartate and glutamate metabolism; ko00650: Butanoate metabolism; ko01100: Metabolic pathways	uncharacterized protein LOC127150144 isoform X2 [Cucumis melo]	--	A0A5A7VGJ9_CUCME RecName: Full=DUF4218 domain-containing protein {ECO:0000259|Pfam:PF13960};	--	--	PF13960.9:Domain of unknown function (DUF4218)
262	novel.336	6.6628	6.0097	8.4348	8.8424	7.2218	6.9279	1.3129	1.371	0.811	1.1847	0.4564	1.0287	chr00	26312291	26312683	-	--	--	Peptidyl-prolyl cis-trans isomerase FKBP16-1, chloroplastic [Morella rubra]	FK161_ARATH RecName: Full=Peptidyl-prolyl cis-trans isomerase FKBP16-1, chloroplastic; Short=PPIase FKBP16-1; EC=5.2.1.8; AltName: Full=FK506-binding protein 16-1; Short=AtFKBP16-1; AltName: Full=Immunophilin FKBP16-1; AltName: Full=Rotamase; Flags: Precursor;	A0A6A1VQ35_9ROSI RecName: Full=Peptidylprolyl isomerase {ECO:0000256|PROSITE-ProRule:PRU00277}; EC=5.2.1.8 {ECO:0000256|PROSITE-ProRule:PRU00277};	--	GO:0009507,chloroplast; GO:0009543,chloroplast thylakoid lumen; GO:0031977,thylakoid lumen; GO:0003755,peptidyl-prolyl cis-trans isomerase activity; GO:0031647,regulation of protein stability; GO:0009644,response to high light intensity; GO:0009414,response to water deprivation; GO:0003674,molecular_function; GO:0003824,catalytic activity; GO:0016853,isomerase activity; GO:0016859,cis-trans isome…	--
263	novel.363	2.5929	2.2708	2.6804	3.0594	3.1365	4.4234	0.3695	0.5504	0.4482	0.3637	0.467	0.4511	chr00	27318498	27319396	-	--	--	hypothetical protein E6C27_scaffold190G00990 [Cucumis melo var. makuwa]	--	A0A5A7UGD3_CUCME SubName: Full=Uncharacterized protein {ECO:0000313|EMBL:KAA0053537.1};	--	--	--
264	novel.393	8.0414	8.291	11.3532	8.8104	10.3549	9.3539	1.7443	1.7863	1.9394	1.328	1.5916	3.2212	chr00	29258721	29258997	.	K03283 heat shock 70kDa protein 1/2/6/8 | (RefSeq) heat shock cognate 70 kDa protein 2 (A)	ko03040: Spliceosome; ko04141: Protein processing in endoplasmic reticulum; ko04144: Endocytosis	Heat shock cognate 70 kDa protein [Cucumis melo var. makuwa]	HSP7N_ARATH RecName: Full=Heat shock 70 kDa protein 18; AltName: Full=Heat shock protein 70-18; Short=AtHsp70-18; AltName: Full=Heat-shock protein 70T-1;	A0A5A7U956_CUCME SubName: Full=Heat shock cognate 70 kDa protein {ECO:0000313|EMBL:KAA0050019.1};	Molecular chaperones HSP70/HSC70, HSP70 superfamily	GO:0009941,chloroplast envelope; GO:0005737,cytoplasm; GO:0005829,cytosol; GO:0005524,ATP binding; GO:0016887,ATPase activity; GO:0140662,NA; GO:0031072,heat shock protein binding; GO:0051787,misfolded protein binding; GO:0044183,protein folding chaperone; GO:0051082,unfolded protein binding; GO:0034620,cellular response to unfolded protein; GO:0051085,chaperone cofactor-dependent protein refoldi…	--
265	novel.4	11.7253	25.7479	25.1676	54.4426	45.4618	57.8197	0	0.0393	0.0605	0.3314	0.0284	0	chr00	2227899	2228638	.	--	--	hypothetical protein E5676_scaffold232G001120 [Cucumis melo var. makuwa]	--	A0A5D3BJ30_CUCME SubName: Full=Uncharacterized protein {ECO:0000313|EMBL:TYJ98375.1};	--	--	--
266	novel.405	3.9734	3.6247	2.3206	3.4116	7.8723	3.9757	0.0858	0	0.1272	0.1161	0	0	chr00	29045546	29045897	-	--	--	BAG-associated GRAM protein 1-like isoform X2 [Cucumis melo var. makuwa]	--	A0A5A7V6F4_CUCME SubName: Full=BAG-associated GRAM protein 1-like isoform X2 {ECO:0000313|EMBL:KAA0061311.1};	--	--	--
267	novel.409	2.7478	3.5929	2.4874	2.8159	1.9102	2.2594	0.356	0.3431	0.8795	1.1242	0.6599	1.1952	chr00	29503280	29510873	-	--	--	RNA-directed DNA polymerase-like protein [Cucumis melo var. makuwa]	--	A0A5D3BTS3_CUCME SubName: Full=RNA-directed DNA polymerase-like protein {ECO:0000313|EMBL:TYK02564.1};	--	GO:0003964,RNA-directed DNA polymerase activity; GO:0003674,molecular_function; GO:0003824,catalytic activity; GO:0016740,transferase activity; GO:0016772,transferase activity, transferring phosphorus-containing groups; GO:0016779,nucleotidyltransferase activity; GO:0034061,DNA polymerase activity; GO:0140097,catalytic activity, acting on DNA	--
268	novel.424	3.3137	3.2203	2.7726	3.8435	3.5541	4.5221	1.1827	0.608	1.052	1.7075	2.1926	2.3297	chr00	30345237	30345619	.	--	--	Ty3/gypsy retrotransposon protein [Cucumis melo var. makuwa]	M860_ARATH RecName: Full=Uncharacterized mitochondrial protein AtMg00860; AltName: Full=ORF158;	A0A5D3BSA8_CUCME SubName: Full=Ty3/gypsy retrotransposon protein {ECO:0000313|EMBL:TYK02563.1};	FOG: Transposon-encoded proteins with TYA, reverse transcriptase, integrase domains in various combinations	GO:0005739,mitochondrion; GO:0005575,cellular_component; GO:0005622,intracellular anatomical structure; GO:0005737,cytoplasm; GO:0043226,organelle; GO:0043227,membrane-bounded organelle; GO:0043229,intracellular organelle; GO:0043231,intracellular membrane-bounded organelle; GO:0110165,cellular anatomical entity	PF00078.30:Reverse transcriptase (RNA-dependent DNA polymerase)
269	novel.48	5.0436	7.56	6.6945	0.7786	1.1074	1.4357	0.2697	0.416	0.3999	0.3834	0.3563	0.1993	chr00	7878252	7880490	.	K11426 [histone H3]-lysine4/36 N-trimethyltransferase SMYD [EC:2.1.1.354 2.1.1.357] | (RefSeq) histone-lysine N-methyltransferase ASHR1 (A)	ko00310: Lysine degradation; ko01100: Metabolic pathways	Ty3/gypsy retrotransposon protein [Cucumis melo var. makuwa]	--	A0A5D3C091_CUCME SubName: Full=Ty3/gypsy retrotransposon protein {ECO:0000313|EMBL:TYK03866.1};	--	GO:0003676,nucleic acid binding; GO:0015074,DNA integration; GO:0003674,molecular_function; GO:0005488,binding; GO:0097159,organic cyclic compound binding; GO:1901363,heterocyclic compound binding; GO:0006139,nucleobase-containing compound metabolic process; GO:0006259,DNA metabolic process; GO:0006725,cellular aromatic compound metabolic process; GO:0006807,nitrogen compound metabolic process; G…	PF08284.14:Retroviral aspartyl protease
270	novel.49	4.1031	2.7371	4.0438	2.7807	2.166	2.6751	1.7939	1.0807	1.3297	0.8094	1.0393	0.502	chr00	8231439	8231842	.	--	--	uncharacterized protein LOC105434756 [Cucumis sativus]	--	A0A5A7VDR7_CUCME SubName: Full=Uncharacterized protein {ECO:0000313|EMBL:KAA0065217.1};	--	GO:0016021,integral component of membrane; GO:0005575,cellular_component; GO:0016020,membrane; GO:0031224,intrinsic component of membrane; GO:0110165,cellular anatomical entity	--
271	novel.526	16.2269	17.4219	13.6141	31.5816	31.4339	31.3285	5.2148	4.7927	2.8766	6.73	7.7567	7.9814	chr00	35623359	35623607	-	K00002 alcohol dehydrogenase (NADP+) [EC:1.1.1.2] | (RefSeq) aldo-keto reductase family 4 member C9-like (A)	ko00010: Glycolysis / Gluconeogenesis; ko00040: Pentose and glucuronate interconversions; ko00053: Ascorbate and aldarate metabolism; ko00561: Glycerolipid metabolism; ko00620: Pyruvate metabolism; ko01100: Metabolic pathways; ko01110: Biosynthesis of secondary metabolites; ko01240: Biosynthesis of cofactors	aldo-keto reductase family 4 member C9-like [Cucumis melo var. makuwa]	AKRC9_ARATH RecName: Full=NADPH-dependent aldo-keto reductase, chloroplastic {ECO:0000303|PubMed:21169366}; Short=AtChlAKR {ECO:0000303|PubMed:21169366}; EC=1.1.1.- {ECO:0000269|PubMed:19616008, ECO:0000269|PubMed:21169366}; AltName: Full=Aldo-keto reductase family 4 member C9;	A0A5A7V0E7_CUCME SubName: Full=Aldo-keto reductase family 4 member C9-like {ECO:0000313|EMBL:KAA0059279.1};	Aldo/keto reductase family proteins	GO:0009507,chloroplast; GO:0005829,cytosol; GO:0005783,endoplasmic reticulum; GO:0008106,alcohol dehydrogenase (NADP+) activity; GO:0004032,alditol:NADP+ 1-oxidoreductase activity; GO:0004033,aldo-keto reductase (NADP) activity; GO:0070401,NADP+ binding; GO:0016229,steroid dehydrogenase activity; GO:0009409,response to cold; GO:0009651,response to salt stress; GO:0009636,response to toxic substan…	--
272	novel.588	8.435	7.9426	7.4771	9.9072	9.4815	10.0572	0	0	0	0	0	0	chr01	20199639	20201647	-	--	--	NBS-LRR type resistance protein [Cucumis melo var. makuwa]	--	A0A5D3D5U3_CUCME SubName: Full=NBS-LRR type resistance protein {ECO:0000313|EMBL:TYK18902.1};	--	--	--
273	novel.608	3.2128	5.6012	4.128	22.1078	24.6674	17.6256	0	0.0149	0.0229	0	0	0	chr01	27697247	27699205	-	--	--	uncharacterized protein E6C27_scaffold19G00360 [Cucumis melo var. makuwa]	POLR1_ARATH RecName: Full=Retrovirus-related Pol polyprotein from transposon RE1; AltName: Full=Retro element 1 {ECO:0000303|PubMed:10689195}; Short=AtRE1 {ECO:0000303|PubMed:10689195}; Includes: RecName: Full=Protease RE1; EC=3.4.23.-; Includes: RecName: Full=Reverse transcriptase RE1; EC=2.7.7.49; Includes: RecName: Full=Endonuclease RE1;	A0A1S4E1U6_CUCME SubName: Full=uncharacterized protein LOC107991581 isoform X1 {ECO:0000313|RefSeq:XP_016902197.1};	FOG: Transposon-encoded proteins with TYA, reverse transcriptase, integrase domains in various combinations	GO:0004190,aspartic-type endopeptidase activity; GO:0004519,endonuclease activity; GO:0046872,metal ion binding; GO:0003676,nucleic acid binding; GO:0003964,RNA-directed DNA polymerase activity; GO:0015074,DNA integration; GO:0006310,DNA recombination; GO:0006508,proteolysis; GO:0003674,molecular_function; GO:0003824,catalytic activity; GO:0004175,endopeptidase activity; GO:0008233,peptidase acti…	PF14223.9:gag-polypeptide of LTR copia-type
274	novel.618	2.4859	2.7912	2.282	4.0731	4.4888	4.619	0.5832	0.6224	0.4103	1.2164	1.2061	0.8233	chr01	32707262	32717409	+	K03549 KUP system potassium uptake protein | (RefSeq) potassium transporter 5-like (A)	--	Cysteine-rich RLK (receptor-like protein kinase) 8 [Cucumis melo var. makuwa]	POLR1_ARATH RecName: Full=Retrovirus-related Pol polyprotein from transposon RE1; AltName: Full=Retro element 1 {ECO:0000303|PubMed:10689195}; Short=AtRE1 {ECO:0000303|PubMed:10689195}; Includes: RecName: Full=Protease RE1; EC=3.4.23.-; Includes: RecName: Full=Reverse transcriptase RE1; EC=2.7.7.49; Includes: RecName: Full=Endonuclease RE1;	A0A5A7VQN7_CUCME SubName: Full=Cysteine-rich RLK (Receptor-like protein kinase) 8 {ECO:0000313|EMBL:KAA0068025.1};	FOG: Transposon-encoded proteins with TYA, reverse transcriptase, integrase domains in various combinations	GO:0004190,aspartic-type endopeptidase activity; GO:0004519,endonuclease activity; GO:0046872,metal ion binding; GO:0003676,nucleic acid binding; GO:0003964,RNA-directed DNA polymerase activity; GO:0015074,DNA integration; GO:0006310,DNA recombination; GO:0006508,proteolysis; GO:0003674,molecular_function; GO:0003824,catalytic activity; GO:0004175,endopeptidase activity; GO:0008233,peptidase acti…	PF07727.17:Reverse transcriptase (RNA-dependent DNA polymerase)
275	novel.64	19.9425	17.0605	19.6446	26.2918	29.4834	34.7184	7.0614	7.249	6.298	10.8787	15.3662	14.8046	chr00	9762697	9763222	.	--	--	--	--	--	--	--	--
276	novel.647	2.618	2.2551	2.1995	2.4071	3.0208	2.5484	1.0007	1.1816	1.2981	0.6095	1.2175	0.7393	chr02	14158454	14160451	+	--	--	--	--	--	--	--	--
277	novel.648	2.6988	1.852	2.0961	2.2291	3.0243	4.4175	0.047	0.0453	0.1392	0	0	0.0631	chr02	14523109	14523751	.	--	--	6-phosphogluconate dehydrogenase [Cucumis melo var. makuwa]	--	A0A5A7V1S9_CUCME RecName: Full=Phosphogluconate dehydrogenase (NADP(+)-dependent, decarboxylating) {ECO:0000256|ARBA:ARBA00013011}; EC=1.1.1.44 {ECO:0000256|ARBA:ARBA00013011};	--	GO:0004616,phosphogluconate dehydrogenase (decarboxylating) activity; GO:0019521,D-gluconate metabolic process; GO:0006098,pentose-phosphate shunt; GO:0003674,molecular_function; GO:0003824,catalytic activity; GO:0016491,oxidoreductase activity; GO:0016614,oxidoreductase activity, acting on CH-OH group of donors; GO:0016616,oxidoreductase activity, acting on the CH-OH group of donors, NAD or NADP…	--
278	novel.651	1.0628	0.9066	0.9794	1.5689	2.1244	1.9936	0	0.0078	0	0	0	0	chr02	14955602	14959354	-	--	--	uncharacterized protein LOC111020109 [Momordica charantia]	--	A0A6J1DDR0_MOMCH SubName: Full=uncharacterized protein LOC111020109 {ECO:0000313|RefSeq:XP_022152365.1};	--	--	--
279	novel.658	0.8494	0.7341	1.4687	6.3523	6.2517	3.9781	0.4083	0.2428	0.2705	1.4581	4.2881	1.0501	chr02	16966737	16970212	-	--	--	--	--	--	--	--	--
280	novel.740	0.8	0.6099	0.811	8.1194	6.3819	5.9	0.1832	0.0482	0.0247	2.1417	1.1232	1.208	chr04	4969790	4971602	-	--	--	importin subunit beta-3-like [Cucumis melo var. makuwa]	--	A0A5A7TTE6_CUCME SubName: Full=Importin subunit beta-3-like {ECO:0000313|EMBL:KAA0046833.1};	--	--	--
281	novel.77	1.403	1.2125	1.7175	5.2184	6.0986	5.5601	0.1937	0.1037	0.2553	2.2141	1.3318	0.7227	chr00	10878124	10879526	+	--	--	uncharacterized protein LOC103485457 isoform X1 [Cucumis melo]	--	A0A1S3B335_CUCME SubName: Full=uncharacterized protein LOC103485457 isoform X4 {ECO:0000313|RefSeq:XP_008441279.1};	--	--	--
282	novel.773	15.8001	10.6621	10.8078	17.2648	17.1981	21.8836	0	0	0	0	0	0	chr04	21550132	21550490	+	--	--	structural maintenance of chromosomes protein 2-1-like [Cucumis melo var. makuwa]	--	A0A5A7U5D9_CUCME SubName: Full=Structural maintenance of chromosomes protein 2-1-like {ECO:0000313|EMBL:KAA0050454.1};	--	GO:0016021,integral component of membrane; GO:0005575,cellular_component; GO:0016020,membrane; GO:0031224,intrinsic component of membrane; GO:0110165,cellular anatomical entity	--
283	novel.798	3.726	5.3534	4.5698	9.133	8.2806	8.0629	2.4586	2.4135	1.7442	4.1853	4.3309	2.4311	chr04	32096265	32098266	+	--	--	histone-lysine N-methyltransferase SETD1B-like isoform X2 [Cucumis melo var. makuwa]	--	A0A5D3DNQ5_CUCME SubName: Full=Histone-lysine N-methyltransferase SETD1B-like isoform X2 {ECO:0000313|EMBL:TYK25228.1};	--	GO:0008168,methyltransferase activity; GO:0032259,methylation; GO:0003674,molecular_function; GO:0003824,catalytic activity; GO:0016740,transferase activity; GO:0016741,transferase activity, transferring one-carbon groups; GO:0008150,biological_process; GO:0008152,metabolic process	PF14309.9:Domain of unknown function (DUF4378)
284	novel.80	2.1813	1.7102	1.8283	1.7047	2.3607	2.4705	0.6415	0.8834	0.4416	0.9613	0.7327	0.9232	chr00	11385670	11386987	-	--	--	uncharacterized protein LOC127150472 isoform X1 [Cucumis melo]	--	A0A0A0L4K7_CUCSA RecName: Full=Castor_Poll_mid domain-containing protein {ECO:0000259|Pfam:PF06241};	--	GO:0016021,integral component of membrane; GO:0006813,potassium ion transport; GO:0006810,transport; GO:0006811,ion transport; GO:0006812,cation transport; GO:0008150,biological_process; GO:0051179,localization; GO:0051234,establishment of localization; GO:0005575,cellular_component; GO:0016020,membrane; GO:0031224,intrinsic component of membrane; GO:0110165,cellular anatomical entity	--
285	novel.802	1.0224	1.2959	0.7354	1.1267	0.8753	1.2378	0	0	0	0.0283	0.0291	0	chr05	2180927	2182370	.	K07937 ADP-ribosylation factor 1/2 | (RefSeq) ADP-ribosylation factor-like protein 2 (A)	ko04144: Endocytosis	soluble inorganic pyrophosphatase 1 [Cucumis melo var. makuwa]	--	A0A5A7V0I1_CUCME SubName: Full=Soluble inorganic pyrophosphatase 1 {ECO:0000313|EMBL:KAA0061682.1};	FOG: Transposon-encoded proteins with TYA, reverse transcriptase, integrase domains in various combinations	--	PF00385.27:Chromo (CHRromatin Organisation MOdifier) domain
286	novel.838	11.7596	9.276	6.2442	2.1536	1.6113	1.6739	0	0	0	0	0	0	chr05	21717657	21720462	+	--	--	hypothetical protein E5676_scaffold70G00040 [Cucumis melo var. makuwa]	--	A0A5D3C571_CUCME SubName: Full=Uncharacterized protein {ECO:0000313|EMBL:TYK06480.1};	--	--	--
287	novel.87	16.7818	16.0117	15.1648	21.0022	22.6535	24.637	6.857	4.6717	4.9998	7.7392	6.646	7.4997	chr00	12409294	12410645	-	K00002 alcohol dehydrogenase (NADP+) [EC:1.1.1.2] | (RefSeq) aldo-keto reductase family 4 member C9-like (A)	ko00010: Glycolysis / Gluconeogenesis; ko00040: Pentose and glucuronate interconversions; ko00053: Ascorbate and aldarate metabolism; ko00561: Glycerolipid metabolism; ko00620: Pyruvate metabolism; ko01100: Metabolic pathways; ko01110: Biosynthesis of secondary metabolites; ko01240: Biosynthesis of cofactors	aldo-keto reductase family 4 member C9-like [Cucumis melo var. makuwa]	--	A0A5A7V0E7_CUCME SubName: Full=Aldo-keto reductase family 4 member C9-like {ECO:0000313|EMBL:KAA0059279.1};	--	GO:0016491,oxidoreductase activity; GO:0003674,molecular_function; GO:0003824,catalytic activity	--
288	novel.873	8.4099	8.5078	10.3288	12.6598	11.4551	12.2161	0.0954	0.0613	0.1131	0.4217	0.1105	0.1025	chr06	11514673	11519421	-	--	--	keratin, type I cytoskeletal 10-like [Cucumis melo var. makuwa]	--	A0A5A7T6F9_CUCME SubName: Full=Keratin, type I cytoskeletal 10-like {ECO:0000313|EMBL:KAA0039074.1};	--	--	--
289	novel.9	0.3867	0.6183	0.5135	0.9665	0.9456	1.4264	0.267	0.2745	0.1407	0.0883	0.2516	0.1036	chr00	2986985	2992074	.	K11426 [histone H3]-lysine4/36 N-trimethyltransferase SMYD [EC:2.1.1.354 2.1.1.357] | (RefSeq) histone-lysine N-methyltransferase ASHR1 (A)	ko00310: Lysine degradation; ko01100: Metabolic pathways	Ty3/gypsy retrotransposon protein [Cucumis melo var. makuwa]	M860_ARATH RecName: Full=Uncharacterized mitochondrial protein AtMg00860; AltName: Full=ORF158;	A0A5D3DT65_CUCME SubName: Full=Ty3/gypsy retrotransposon protein {ECO:0000313|EMBL:TYK26440.1};	FOG: Transposon-encoded proteins with TYA, reverse transcriptase, integrase domains in various combinations	GO:0005739,mitochondrion; GO:0005575,cellular_component; GO:0005622,intracellular anatomical structure; GO:0005737,cytoplasm; GO:0043226,organelle; GO:0043227,membrane-bounded organelle; GO:0043229,intracellular organelle; GO:0043231,intracellular membrane-bounded organelle; GO:0110165,cellular anatomical entity	PF00078.30:Reverse transcriptase (RNA-dependent DNA polymerase)
290	novel.946	3.964	3.1994	3.8141	3.0649	3.9724	3.2348	0.235	0.2265	0.2323	0.5831	0.4901	0.1578	chr07	26409891	26410661	.	--	--	hypothetical protein Csa_014902, partial [Cucumis sativus]	--	A0A0A0KZ29_CUCSA SubName: Full=Uncharacterized protein {ECO:0000313|EMBL:KGN53111.1};	--	--	--
291	novel.95	6.3319	4.3988	3.6369	8.0347	5.3509	6.5064	0.7349	0.7406	0.6438	1.9894	2.0436	2.6022	chr00	12737763	12739595	-	K12621 U6 snRNA-associated Sm-like protein LSm2 | (RefSeq) sm-like protein LSM2 (A)	ko03018: RNA degradation; ko03040: Spliceosome	hypothetical protein L3X38_019582 [Prunus dulcis]	POLR1_ARATH RecName: Full=Retrovirus-related Pol polyprotein from transposon RE1; AltName: Full=Retro element 1 {ECO:0000303|PubMed:10689195}; Short=AtRE1 {ECO:0000303|PubMed:10689195}; Includes: RecName: Full=Protease RE1; EC=3.4.23.-; Includes: RecName: Full=Reverse transcriptase RE1; EC=2.7.7.49; Includes: RecName: Full=Endonuclease RE1;	A0A5N5HXQ2_9ROSA RecName: Full=Integrase catalytic domain-containing protein {ECO:0000259|PROSITE:PS50994};	FOG: Transposon-encoded proteins with TYA, reverse transcriptase, integrase domains in various combinations	GO:0004190,aspartic-type endopeptidase activity; GO:0004519,endonuclease activity; GO:0046872,metal ion binding; GO:0003676,nucleic acid binding; GO:0003964,RNA-directed DNA polymerase activity; GO:0015074,DNA integration; GO:0006310,DNA recombination; GO:0006508,proteolysis; GO:0003674,molecular_function; GO:0003824,catalytic activity; GO:0004175,endopeptidase activity; GO:0008233,peptidase acti…	PF00665.29:Integrase core domain
292	novel.989	0.9897	0.7713	0.5026	0.9785	1.2909	1.2474	0	0	0	0	0	0	chr08	17185789	17187332	.	--	--	hypothetical protein E5676_scaffold70G00040 [Cucumis melo var. makuwa]	--	A0A5D3C571_CUCME SubName: Full=Uncharacterized protein {ECO:0000313|EMBL:TYK06480.1};	--	--	--
293	novel.996	0.6157	0.6972	0.1674	1.6194	2.0522	2.2714	0	0	0	0	0	0	chr08	19798067	19800506	-	--	--	Repetitive proline-rich cell wall protein [Cucumis melo var. makuwa]	--	A0A5D3D374_CUCME SubName: Full=Repetitive proline-rich cell wall protein {ECO:0000313|EMBL:TYK17119.1};	--	--	--

## Sheet: Table S4
Supplemental Table S4. Information of the 447 DEGs whose expression level in ‘K10-1’ was always lower than that in ‘K10-9’ in the control and treatment.
Nr.	ID	K10-1-CK-1_fpkm	K10-1-CK-2_fpkm	K10-1-CK-3_fpkm	K10-1-DM-1_fpkm	K10-1-DM-2_fpkm	K10-1-DM-3_fpkm	K10-9-CK-1_fpkm	K10-9-CK-2_fpkm	K10-9-CK-3_fpkm	K10-9-DM-1_fpkm	K10-9-DM-2_fpkm	K10-9-DM-3_fpkm	chr	start	end	strand	KEGG	KEGG pathway	NR	Swissprot	Tremble	KOG	GO	Pfam
1	MELO3C000062.2	3.1945	5.3998	3.1607	10.0709	12.4036	13.3866	28.3352	26.4672	21.2737	53.1295	56.7619	59.7341	chr00	8699335	8700202	-	--	--	putative disease resistance protein [Cucumis melo var. makuwa]	DRL16_ARATH RecName: Full=Probable disease resistance protein At1g61190;	A0A5D3D479_CUCME SubName: Full=Putative disease resistance protein {ECO:0000313|EMBL:TYK18359.1};	Apoptotic ATPase	GO:0043531,ADP binding; GO:0005524,ATP binding; GO:0006952,defense response; GO:0000166,nucleotide binding; GO:0003674,molecular_function; GO:0005488,binding; GO:0017076,purine nucleotide binding; GO:0030554,adenyl nucleotide binding; GO:0032553,ribonucleotide binding; GO:0032555,purine ribonucleotide binding; GO:0032559,adenyl ribonucleotide binding; GO:0036094,small molecule binding; GO:0043167…	PF00931.25:NB-ARC domain
2	MELO3C000169.2	37.5847	40.4507	34.0352	32.1956	39.8645	46.9248	43.35	101.292	119.478	80.2921	53.5574	151.328	chr00	10172612	10173247	+	K08472 mlo protein | (RefSeq) Mlo1; MLO-like protein 1 (A)	--	MLO-like protein 1 [Cucumis melo]	MLO1_ARATH RecName: Full=MLO-like protein 1; Short=AtMlo1; AltName: Full=MLO protein homolog 1; Short=AtMlo-H1;	J9PC91_CUCME RecName: Full=MLO-like protein {ECO:0000256|RuleBase:RU280816};	--	GO:0016021,integral component of membrane; GO:0005886,plasma membrane; GO:0005516,calmodulin binding; GO:0006952,defense response; GO:0009607,response to biotic stimulus; GO:0003674,molecular_function; GO:0005488,binding; GO:0005515,protein binding; GO:0006950,response to stress; GO:0008150,biological_process; GO:0050896,response to stimulus; GO:0005575,cellular_component; GO:0016020,membrane; GO…	PF03094.18:Mlo family
3	MELO3C000413.2	6.3958	7.2994	5.8653	5.5631	5.5341	7.0613	15.8655	23.5506	21.5602	21.5458	25.0013	25.9261	chr00	13720010	13720853	-	--	--	Protein NAR1, partial [Cucurbita argyrosperma subsp. argyrosperma]	NAR1_ARATH RecName: Full=Protein NAR1 {ECO:0000303|PubMed:23734982}; AltName: Full=Nuclear architecture related 1 {ECO:0000303|PubMed:23734982}; AltName: Full=Protein GROWTH AT DIFFERENT OXYGEN LEVELS INFLUENCES MORPHOGENESIS {ECO:0000303|PubMed:18329103}; AltName: Full=[FeFe]-hydrogenase-like protein GOLLUM {ECO:0000303|PubMed:18329103};	A0A0A0LVS1_CUCSA RecName: Full=Fe_hyd_SSU domain-containing protein {ECO:0000259|SMART:SM00902};	Nuclear architecture related protein	GO:0005829,cytosol; GO:0005634,nucleus; GO:0051539,4 iron, 4 sulfur cluster binding; GO:0046872,metal ion binding; GO:0070482,response to oxygen levels; GO:0003674,molecular_function; GO:0005488,binding; GO:0051536,iron-sulfur cluster binding; GO:0051540,metal cluster binding; GO:0043167,ion binding; GO:0043169,cation binding; GO:0008150,biological_process; GO:0009628,response to abiotic stimulus…	--
4	MELO3C000515.2	0.1363	0.0373	0.2508	0.3738	0.2559	0.2552	2.0396	2.6809	3.2593	1.2907	2.0625	1.1741	chr00	15049793	15051137	+	--	--	LOW QUALITY PROTEIN: TMV resistance protein N-like [Cucumis melo]	--	A0A5A7TWU2_CUCME SubName: Full=TMV resistance protein N-like {ECO:0000313|EMBL:KAA0047972.1};	--	GO:0043531,ADP binding; GO:0006952,defense response; GO:0007165,signal transduction; GO:0000166,nucleotide binding; GO:0003674,molecular_function; GO:0005488,binding; GO:0017076,purine nucleotide binding; GO:0030554,adenyl nucleotide binding; GO:0032553,ribonucleotide binding; GO:0032555,purine ribonucleotide binding; GO:0032559,adenyl ribonucleotide binding; GO:0036094,small molecule binding; GO…	--
5	MELO3C000527.2	0.1583	0.2599	0.0555	0.1052	0.132	0.0847	1.23	1.2844	2.0362	0.6937	0.9122	0.6884	chr00	15287115	15291278	+	--	--	disease resistance protein RPP2B-like [Cucumis melo]	KN1_SOLLC RecName: Full=Homeotic protein knotted-1; Short=TKN1;	E5GB33_CUCME SubName: Full=TIR-NBS-LRR disease resistance protein {ECO:0000313|EMBL:ADN33675.1};	Transcription factor MEIS1 and related HOX domain proteins	GO:0005634,nucleus; GO:0000981,DNA-binding transcription factor activity, RNA polymerase II-specific; GO:0000978,RNA polymerase II cis-regulatory region sequence-specific DNA binding; GO:0006357,regulation of transcription by RNA polymerase II; GO:0003674,molecular_function; GO:0003700,DNA-binding transcription factor activity; GO:0140110,transcription regulator activity; GO:0000976,transcription…	PF13855.9:Leucine rich repeat
6	MELO3C000887.2	0	0	0	0	0	0.1098	3.7328	8.0724	5.3209	0.9716	15.9366	5.9777	chr05	26185828	26186458	+	--	--	miraculin-like [Cucumis melo var. makuwa]	KI111_MEDTR RecName: Full=Kunitz type trypsin inhibitor 111 {ECO:0000303|PubMed:23662629}; Flags: Precursor;	A0A5A7VDV8_CUCME SubName: Full=Miraculin-like {ECO:0000313|EMBL:KAA0063689.1};	--	GO:0048046,apoplast; GO:0004867,serine-type endopeptidase inhibitor activity; GO:0003674,molecular_function; GO:0004857,enzyme inhibitor activity; GO:0004866,endopeptidase inhibitor activity; GO:0030234,enzyme regulator activity; GO:0030414,peptidase inhibitor activity; GO:0061134,peptidase regulator activity; GO:0061135,endopeptidase regulator activity; GO:0098772,molecular function regulator; G…	PF00197.21:Trypsin and protease inhibitor
7	MELO3C001500.2	0.8477	1.1599	0.8168	0.9156	1.1491	1.0077	1.3726	2.9636	3.6627	1.3377	4.7331	4.6458	chr09	8396816	8397570	+	K15812 cucurbitadienol synthase [EC:5.4.99.33] | (RefSeq) cucurbitadienol synthase (A)	ko00909: Sesquiterpenoid and triterpenoid biosynthesis; ko00996: Biosynthesis of various alkaloids; ko01110: Biosynthesis of secondary metabolites	lupeol synthase-like [Cucumis melo var. makuwa]	BASM1_KALSE RecName: Full=Beta-amyrin synthase 1 {ECO:0000303|PubMed:29186583}; Short=KsBAS1 {ECO:0000303|PubMed:29186583}; EC=5.4.99.39 {ECO:0000269|PubMed:29186583};	A0A5A7TC51_CUCME RecName: Full=Terpene cyclase/mutase family member {ECO:0000256|RuleBase:RU362003}; EC=5.4.99.- {ECO:0000256|RuleBase:RU362003};	Oxidosqualene-lanosterol cyclase and related proteins	GO:0005811,lipid droplet; GO:0042300,beta-amyrin synthase activity; GO:0016104,triterpenoid biosynthetic process; GO:0003674,molecular_function; GO:0003824,catalytic activity; GO:0016853,isomerase activity; GO:0016866,intramolecular transferase activity; GO:0031559,oxidosqualene cyclase activity; GO:0006629,lipid metabolic process; GO:0006720,isoprenoid metabolic process; GO:0006721,terpenoid met…	PF13243.9:Squalene-hopene cyclase C-terminal domain
8	MELO3C002050.2	1.4144	1.5082	1.738	1.3462	0.7241	1.5133	7.3459	13.6658	17.367	19.1609	20.1451	29.3976	chr12	26657501	26662942	-	K09264 MADS-box transcription factor, plant | (RefSeq) truncated transcription factor CAULIFLOWER A (A)	--	truncated transcription factor CAULIFLOWER A isoform X1 [Cucumis melo]	AP1_VITVI RecName: Full=Agamous-like MADS-box protein AP1 {ECO:0000305}; AltName: Full=APETALA1-like protein {ECO:0000303|PubMed:15247405}; Short=AP1-like protein {ECO:0000303|PubMed:15247405}; Short=VvAP1 {ECO:0000303|PubMed:18997115}; Short=VviAP1 {ECO:0000303|PubMed:26818751};	A0A1S3BWS7_CUCME SubName: Full=truncated transcription factor CAULIFLOWER A isoform X1 {ECO:0000313|RefSeq:XP_008453619.1};	MADS box transcription factor	GO:0005634,nucleus; GO:0000981,DNA-binding transcription factor activity, RNA polymerase II-specific; GO:0046983,protein dimerization activity; GO:0000978,RNA polymerase II cis-regulatory region sequence-specific DNA binding; GO:0010582,floral meristem determinacy; GO:0045944,positive regulation of transcription by RNA polymerase II; GO:0006357,regulation of transcription by RNA polymerase II; GO…	PF01486.20:K-box region
9	MELO3C002150.2	7.6886	19.4566	11.7381	25.256	67.7167	33.1665	20.0444	70.4982	106.982	85.7682	92.7363	107.56	chr12	26001994	26003263	+	K20604 mitogen-activated protein kinase kinase 9 [EC:2.7.12.2] | (RefSeq) mitogen-activated protein kinase kinase 9 (A)	ko04016: MAPK signaling pathway - plant	mitogen-activated protein kinase kinase 9 [Cucumis melo]	M2K9_ARATH RecName: Full=Mitogen-activated protein kinase kinase 9; Short=AtMKK9; Short=MAP kinase kinase 9; EC=2.7.12.2;	A0A5D3BGX9_CUCME SubName: Full=Mitogen-activated protein kinase kinase 9 {ECO:0000313|EMBL:TYJ99050.1};	Mitogen-activated protein kinase kinase (MAP2K)	GO:0005737,cytoplasm; GO:0005634,nucleus; GO:0005524,ATP binding; GO:0004708,MAP kinase kinase activity; GO:0030295,protein kinase activator activity; GO:0106310,protein serine kinase activity; GO:0004674,protein serine/threonine kinase activity; GO:0004713,protein tyrosine kinase activity; GO:0010120,camalexin biosynthetic process; GO:0071456,cellular response to hypoxia; GO:0009693,ethylene bio…	PF00069.28:Protein kinase domain
10	MELO3C002190.2	2.0784	2.2096	1.8698	1.2155	0.7252	1.3043	5.7474	3.3539	8.7968	19.0276	8.0563	18.6101	chr12	25704453	25707382	+	K03327 multidrug resistance protein, MATE family | (RefSeq) protein DETOXIFICATION 35 (A)	--	protein DETOXIFICATION 35 [Cucumis melo]	DTX35_ARATH RecName: Full=Protein DETOXIFICATION 35 {ECO:0000303|PubMed:11739388}; Short=AtDTX35 {ECO:0000303|PubMed:11739388}; AltName: Full=Multidrug and toxic compound extrusion protein 35 {ECO:0000305}; Short=MATE protein 35 {ECO:0000305}; AltName: Full=Protein DETOXIFYING EFFLUX CARRIER 35 {ECO:0000303|PubMed:19995827}; Short=Protein DTX5 {ECO:0000303|PubMed:19995827}; AltName: Full=Protein …	A0A1S3ATX8_CUCME RecName: Full=Protein DETOXIFICATION {ECO:0000256|RuleBase:RU004914}; AltName: Full=Multidrug and toxic compound extrusion protein {ECO:0000256|RuleBase:RU004914};	Uncharacterized membrane protein, predicted efflux pump	GO:0016021,integral component of membrane; GO:0016020,membrane; GO:0005774,vacuolar membrane; GO:0005773,vacuole; GO:0015297,antiporter activity; GO:0022857,transmembrane transporter activity; GO:0042910,xenobiotic transmembrane transporter activity; GO:0009813,flavonoid biosynthetic process; GO:1990961,xenobiotic detoxification by transmembrane export across the plasma membrane; GO:0003674,molec…	PF01554.21:MatE
11	MELO3C002314.2	0.9478	0.9756	0.6246	5.4373	5.7616	4.7069	6.2176	3.1793	2.5916	16.6526	11.89	13.6007	chr12	24955845	24957794	-	K20617 cytochrome P450 family 71 subfamily A | (RefSeq) cytochrome P450 71A1-like (A)	--	cytochrome P450 71A1-like [Cucumis melo var. makuwa]	C7113_PRUMU RecName: Full=Cytochrome P450 71AP13 {ECO:0000303|PubMed:25015725}; EC=1.14.-.- {ECO:0000305};	A0A5D3BIU1_CUCME SubName: Full=Cytochrome P450 71A1-like {ECO:0000313|EMBL:TYJ99203.1};	Cytochrome P450 CYP2 subfamily	GO:0016021,integral component of membrane; GO:0020037,heme binding; GO:0005506,iron ion binding; GO:0004497,monooxygenase activity; GO:0016705,oxidoreductase activity, acting on paired donors, with incorporation or reduction of molecular oxygen; GO:0003674,molecular_function; GO:0005488,binding; GO:0046906,tetrapyrrole binding; GO:0097159,organic cyclic compound binding; GO:1901363,heterocyclic c…	PF00067.25:Cytochrome P450
12	MELO3C002421.2	2.4291	2.5927	1.3646	23.3881	27.3852	25.3156	2.6374	6.2274	5.3794	64.6871	51.943	74.1034	chr12	24126641	24129443	+	K18368 caffeoylshikimate esterase [EC:3.1.1.-] | (RefSeq) caffeoylshikimate esterase-like (A)	ko00940: Phenylpropanoid biosynthesis; ko01100: Metabolic pathways; ko01110: Biosynthesis of secondary metabolites	caffeoylshikimate esterase-like [Cucumis melo]	CSE_ARATH RecName: Full=Caffeoylshikimate esterase; EC=3.1.1.-; AltName: Full=Lysophospholipase 2; Short=LysoPL2;	A0A1S3B1R7_CUCME SubName: Full=caffeoylshikimate esterase-like {ECO:0000313|RefSeq:XP_008440696.1};	Lysophospholipase	GO:0005783,endoplasmic reticulum; GO:0005794,Golgi apparatus; GO:0016020,membrane; GO:0005634,nucleus; GO:0005886,plasma membrane; GO:0009506,plasmodesma; GO:0003846,2-acylglycerol O-acyltransferase activity; GO:0090430,caffeoyl-CoA: alcohol caffeoyl transferase activity; GO:0016787,hydrolase activity; GO:0016298,lipase activity; GO:0004622,lysophospholipase activity; GO:0009809,lignin biosynthet…	PF12146.11:Serine aminopeptidase, S33
13	MELO3C002517.2	0.5694	1.2176	0.3341	2.1587	2.0381	1.9905	2.5782	2.7529	7.5298	6.7285	5.2162	7.5269	chr12	23508606	23514874	+	K14175 (3S,6E)-nerolidol synthase [EC:4.2.3.48] | (RefSeq) (3S,6E)-nerolidol synthase 1-like (A)	ko00909: Sesquiterpenoid and triterpenoid biosynthesis; ko01100: Metabolic pathways	(3S,6E)-nerolidol synthase 1-like [Cucumis melo]	NES1_FRAAN RecName: Full=(3S,6E)-nerolidol synthase 1; Short=FaNES1; EC=4.2.3.48;	A0A1S3B3I5_CUCME SubName: Full=(3S,6E)-nerolidol synthase 1-like {ECO:0000313|RefSeq:XP_008441685.1};	--	GO:0005829,cytosol; GO:0000287,magnesium ion binding; GO:0010333,terpene synthase activity; GO:0016102,diterpenoid biosynthetic process; GO:0003674,molecular_function; GO:0005488,binding; GO:0043167,ion binding; GO:0043169,cation binding; GO:0046872,metal ion binding; GO:0003824,catalytic activity; GO:0016829,lyase activity; GO:0016835,carbon-oxygen lyase activity; GO:0016838,carbon-oxygen lyase …	PF03936.19:Terpene synthase family, metal binding domain
14	MELO3C002526.2	0.9575	1.0926	0.7933	1.6262	1.1575	1.2588	3.2354	3.8481	3.2257	2.1768	4.0383	2.5667	chr12	23409102	23413291	-	K03327 multidrug resistance protein, MATE family | (RefSeq) protein DETOXIFICATION 40-like (A)	--	protein DETOXIFICATION 40-like isoform X1 [Cucumis melo var. makuwa]	DTX40_ARATH RecName: Full=Protein DETOXIFICATION 40 {ECO:0000303|PubMed:11739388}; Short=AtDTX40 {ECO:0000303|PubMed:11739388}; AltName: Full=Multidrug and toxic compound extrusion protein 40 {ECO:0000305}; Short=MATE protein 40 {ECO:0000305};	A0A5A7UTQ5_CUCME RecName: Full=Protein DETOXIFICATION {ECO:0000256|RuleBase:RU004914}; AltName: Full=Multidrug and toxic compound extrusion protein {ECO:0000256|RuleBase:RU004914};	Uncharacterized membrane protein, predicted efflux pump	GO:0016021,integral component of membrane; GO:0016020,membrane; GO:0000325,plant-type vacuole; GO:0005774,vacuolar membrane; GO:0005773,vacuole; GO:0015297,antiporter activity; GO:0022857,transmembrane transporter activity; GO:0042910,xenobiotic transmembrane transporter activity; GO:1990961,xenobiotic detoxification by transmembrane export across the plasma membrane; GO:0003674,molecular_functio…	PF01554.21:MatE
15	MELO3C002606.2	0.1203	0.237	0.2656	0.5758	1.5129	0.6307	0.3226	0.9869	1.809	12.7003	7.9763	15.4849	chr12	22801862	22804014	-	K13416 brassinosteroid insensitive 1-associated receptor kinase 1 [EC:2.7.10.1 2.7.11.1] | (RefSeq) BRASSINOSTEROID INSENSITIVE 1-associated receptor kinase 1-like (A)	ko04016: MAPK signaling pathway - plant; ko04075: Plant hormone signal transduction; ko04626: Plant-pathogen interaction	L-type lectin-domain containing receptor kinase VII.1 [Cucumis melo var. makuwa]	LRK71_ARATH RecName: Full=L-type lectin-domain containing receptor kinase VII.1; Short=LecRK-VII.1; EC=2.7.11.1; Flags: Precursor;	A0A5D3DT51_CUCME SubName: Full=L-type lectin-domain containing receptor kinase VII.1 {ECO:0000313|EMBL:TYK26420.1};	--	GO:0016021,integral component of membrane; GO:0005886,plasma membrane; GO:0005524,ATP binding; GO:0030246,carbohydrate binding; GO:0106310,protein serine kinase activity; GO:0004675,transmembrane receptor protein serine/threonine kinase activity; GO:0042742,defense response to bacterium; GO:0002229,defense response to oomycetes; GO:0006468,protein phosphorylation; GO:0000166,nucleotide binding; G…	PF00139.22:Legume lectin domain
16	MELO3C002607.2	0.0579	0.0634	0.1217	0.1155	0.1449	0.1755	0.9676	1.0411	0.8673	0.8528	0.3285	1.2996	chr12	22791345	22792808	-	--	--	uncharacterized protein LOC103486438 [Cucumis melo]	--	A0A5D3DRV1_CUCME SubName: Full=Uncharacterized protein {ECO:0000313|EMBL:TYK26421.1};	--	--	PF04720.15:PDDEXK-like family of unknown function
17	MELO3C002610.2	0.0508	0.1669	0.4008	0.3041	0.0954	0.1224	4.2081	3.5134	2.0648	1.4039	3.523	0.9553	chr12	22757747	22758917	-	--	--	non-classical arabinogalactan protein 31 [Cucumis melo]	AGP31_ARATH RecName: Full=Non-classical arabinogalactan protein 31 {ECO:0000303|PubMed:17885091}; AltName: Full=Hydroxyproline-rich arabinogalactan protein 31 {ECO:0000305}; Flags: Precursor;	A0A5A7URZ5_CUCME SubName: Full=Non-classical arabinogalactan protein 31 {ECO:0000313|EMBL:KAA0056996.1};	--	GO:0071944,cell periphery; GO:0005576,extracellular region; GO:0009505,plant-type cell wall; GO:0005886,plasma membrane; GO:0009506,plasmodesma; GO:0009753,response to jasmonic acid; GO:0008150,biological_process; GO:0009719,response to endogenous stimulus; GO:0009725,response to hormone; GO:0010033,response to organic substance; GO:0033993,response to lipid; GO:0042221,response to chemical; GO:0…	PF01190.20:Pollen protein Ole e 1 like
18	MELO3C002689.2	0.6133	1.8334	0.5704	2.352	3.424	2.1789	0.9717	7.6169	13.7263	7.023	7.3931	5.4915	chr12	22012886	22017367	-	K14510 serine/threonine-protein kinase CTR1 [EC:2.7.11.1] | (RefSeq) CTR1; serine/threonine-protein kinase CTR1-like (A)	ko04016: MAPK signaling pathway - plant; ko04075: Plant hormone signal transduction	serine/threonine-protein kinase STY8-like [Cucumis melo var. makuwa]	ILK1_ARATH RecName: Full=Integrin-linked protein kinase 1 {ECO:0000303|PubMed:27208244}; EC=2.7.11.1 {ECO:0000269|PubMed:27208244}; AltName: Full=Ankyrin protein kinase 1 {ECO:0000303|PubMed:12650621};	A0A5A7UU91_CUCME SubName: Full=Serine/threonine-protein kinase STY8-like {ECO:0000313|EMBL:KAA0057071.1};	Tyrosine kinase specific for activated (GTP-bound) p21cdc42Hs	GO:0009898,cytoplasmic side of plasma membrane; GO:0005783,endoplasmic reticulum; GO:0005789,endoplasmic reticulum membrane; GO:0005524,ATP binding; GO:0004672,protein kinase activity; GO:0106310,protein serine kinase activity; GO:0004674,protein serine/threonine kinase activity; GO:0004712,protein serine/threonine/tyrosine kinase activity; GO:0045087,innate immune response; GO:0046777,protein au…	PF07714.20:Protein tyrosine and serine/threonine kinase
19	MELO3C002925.2	0.1066	0	0	0.1594	0.3001	0.2281	1.1806	9.5825	2.9476	2.1025	54.5147	6.9266	chr09	7859988	7860473	+	--	--	Cystatin [Cucumis melo var. makuwa]	--	A0A5D3C5B1_CUCME SubName: Full=Cystatin {ECO:0000313|EMBL:TYK05566.1};	--	GO:0004869,cysteine-type endopeptidase inhibitor activity; GO:0003674,molecular_function; GO:0004857,enzyme inhibitor activity; GO:0004866,endopeptidase inhibitor activity; GO:0030234,enzyme regulator activity; GO:0030414,peptidase inhibitor activity; GO:0061134,peptidase regulator activity; GO:0061135,endopeptidase regulator activity; GO:0098772,molecular function regulator	PF16845.8:Aspartic acid proteinase inhibitor
20	MELO3C002952.2	1.3872	5.0861	1.4533	1.3784	1.6229	2.2822	1.9386	16.5074	16.8656	3.3886	3.8738	5.8472	chr09	8665759	8669834	-	K24195 xenotropic and polytropic retrovirus receptor 1 | (RefSeq) phosphate transporter PHO1 homolog 1 (A)	--	phosphate transporter PHO1 homolog 3-like [Cucumis melo]	PHO13_ARATH RecName: Full=Phosphate transporter PHO1 homolog 3; AltName: Full=Protein PHO1 homolog 3; Short=AtPHO1;H3;	A0A1S3CPH7_CUCME SubName: Full=phosphate transporter PHO1 homolog 3-like {ECO:0000313|RefSeq:XP_008465732.1};	Predicted small molecule transporter	GO:0005737,cytoplasm; GO:0005794,Golgi apparatus; GO:0016021,integral component of membrane; GO:0005886,plasma membrane; GO:0005802,trans-Golgi network; GO:0000822,inositol hexakisphosphate binding; GO:0015114,phosphate ion transmembrane transporter activity; GO:0016036,cellular response to phosphate starvation; GO:0055062,phosphate ion homeostasis; GO:0006817,phosphate ion transport; GO:0055069,…	PF03124.17:EXS family
21	MELO3C003210.2	2.1339	2.3614	1.9019	2.6134	1.6544	2.9283	2.2896	7.1942	15.2074	7.5401	3.5971	6.1503	chr08	33192071	33196347	+	K22697 sphingomyelin synthase-related protein 1 | (RefSeq) phosphatidylinositol:ceramide inositolphosphotransferase 2 (A)	--	phosphatidylinositol:ceramide inositolphosphotransferase 2 [Cucumis melo var. makuwa]	IPCS2_ARATH RecName: Full=Phosphatidylinositol:ceramide inositolphosphotransferase 2 {ECO:0000305}; EC=2.7.1.227 {ECO:0000269|PubMed:19001565}; AltName: Full=Inositol-phosphorylceramide synthase 2 {ECO:0000303|PubMed:20309609}; Short=AtIPCS2 {ECO:0000303|PubMed:20309609}; Short=IPC synthase 2 {ECO:0000303|PubMed:20309609}; AltName: Full=Protein ENHANCING RPW8-MEDIATED HR-LIKE CELL DEATH 1 {ECO:00…	A0A5A7TV18_CUCME SubName: Full=Phosphatidylinositol:ceramide inositolphosphotransferase 2 {ECO:0000313|EMBL:KAA0045089.1};	Uncharacterized conserved protein	GO:0030176,integral component of endoplasmic reticulum membrane; GO:0030173,integral component of Golgi membrane; GO:0005887,integral component of plasma membrane; GO:0005802,trans-Golgi network; GO:0047493,ceramide cholinephosphotransferase activity; GO:0045140,inositol phosphoceramide synthase activity; GO:0033188,sphingomyelin synthase activity; GO:0046513,ceramide biosynthetic process; GO:000…	PF14360.9:PAP2 superfamily C-terminal
22	MELO3C003660.2	31.8118	65.83	25.2409	36.9573	38.5132	61.2335	23.1351	224.334	290.082	170.599	84.0597	146.752	chr04	3082863	3087979	-	K10144 RING finger and CHY zinc finger domain-containing protein 1 [EC:2.3.2.27] | (RefSeq) E3 ubiquitin-protein ligase MIEL1 (A)	ko04120: Ubiquitin mediated proteolysis	probable E3 ubiquitin-protein ligase RZFP34 isoform X2 [Cucumis melo]	ZFP34_ORYSJ RecName: Full=Probable E3 ubiquitin-protein ligase RZFP34 {ECO:0000305}; EC=2.3.2.27 {ECO:0000305}; AltName: Full=OsRFP1 {ECO:0000303|Ref.1}; AltName: Full=RING zinc-finger protein 34 {ECO:0000303|PubMed:25002225}; Short=OsRZFP34 {ECO:0000303|PubMed:25002225};	A0A1S3CSD5_CUCME SubName: Full=E3 ubiquitin-protein ligase MIEL1 isoform X2 {ECO:0000313|RefSeq:XP_008466355.1};	Zn-finger protein	GO:0005634,nucleus; GO:0061630,ubiquitin protein ligase activity; GO:0008270,zinc ion binding; GO:0016567,protein ubiquitination; GO:0006511,ubiquitin-dependent protein catabolic process; GO:0003674,molecular_function; GO:0003824,catalytic activity; GO:0004842,ubiquitin-protein transferase activity; GO:0016740,transferase activity; GO:0019787,ubiquitin-like protein transferase activity; GO:006165…	PF14599.9:Zinc-ribbon
23	MELO3C003911.2	0.9836	1.8514	1.5258	2.1767	2.5216	3.6062	1.7621	7.4946	9.0805	11.4832	6.7667	16.6541	chr05	20423900	20433069	-	K16280 E3 ubiquitin-protein ligase RGLG [EC:2.3.2.27] | (RefSeq) E3 ubiquitin-protein ligase RGLG2-like (A)	--	protein BONZAI 3 [Cucumis melo]	BON3_ARATH RecName: Full=Protein BONZAI 3;	A0A1S4E2I1_CUCME SubName: Full=protein BONZAI 3 {ECO:0000313|RefSeq:XP_008450469.1, ECO:0000313|RefSeq:XP_008450473.1};	Copine	GO:0005886,plasma membrane; GO:0005544,calcium-dependent phospholipid binding; GO:0046872,metal ion binding; GO:0071277,cellular response to calcium ion; GO:0006952,defense response; GO:0060548,negative regulation of cell death; GO:0090332,stomatal closure; GO:0003674,molecular_function; GO:0005488,binding; GO:0005543,phospholipid binding; GO:0008289,lipid binding; GO:0043167,ion binding; GO:0043…	PF07002.19:Copine
24	MELO3C004039.2	0.6671	1.0001	0.7318	1.3448	2.4498	1.4585	1.0483	2.7379	4.3614	6.179	4.3492	6.5402	chr05	23162417	23163309	+	--	--	uncharacterized protein LOC103499218 [Cucumis melo]	--	A0A5A7UIE5_CUCME SubName: Full=Uncharacterized protein {ECO:0000313|EMBL:KAA0055612.1};	--	--	PF07939.14:Protein of unknown function (DUF1685)
25	MELO3C004311.2	2.6364	4.4762	2.3083	2.5021	3.869	2.521	4.1273	8.1496	9.9525	13.7067	11.6168	12.7593	chr05	26280801	26299171	-	--	--	TMV resistance protein N-like isoform X2 [Cucumis melo var. makuwa]	TMVRN_NICGU RecName: Full=TMV resistance protein N; EC=3.2.2.6 {ECO:0000255|PROSITE-ProRule:PRU00204};	A0A1S3C0G1_CUCME SubName: Full=TMV resistance protein N-like isoform X2 {ECO:0000313|RefSeq:XP_008455236.2};	--	GO:0005737,cytoplasm; GO:0043531,ADP binding; GO:0005524,ATP binding; GO:0050135,NAD(P)+ nucleosidase activity; GO:0061809,NAD+ nucleotidase, cyclic ADP-ribose generating; GO:0050832,defense response to fungus; GO:0009626,plant-type hypersensitive response; GO:0007165,signal transduction; GO:0000166,nucleotide binding; GO:0003674,molecular_function; GO:0005488,binding; GO:0017076,purine nucleotid…	PF01582.23:TIR domain
26	MELO3C004317.2	2.0492	3.0615	2.3308	6.0293	5.8641	5.6699	10.0462	11.0614	7.9256	21.6556	19.4145	25.2241	chr05	26351673	26353371	+	--	--	putative disease resistance protein [Cucumis melo var. makuwa]	DRL27_ARATH RecName: Full=Disease resistance protein At4g27190;	A0A1S4DYS1_CUCME SubName: Full=probable disease resistance protein At4g27220 {ECO:0000313|RefSeq:XP_016901124.1};	Apoptotic ATPase	GO:0043531,ADP binding; GO:0005524,ATP binding; GO:0006952,defense response; GO:0000166,nucleotide binding; GO:0003674,molecular_function; GO:0005488,binding; GO:0017076,purine nucleotide binding; GO:0030554,adenyl nucleotide binding; GO:0032553,ribonucleotide binding; GO:0032555,purine ribonucleotide binding; GO:0032559,adenyl ribonucleotide binding; GO:0036094,small molecule binding; GO:0043167…	PF12799.10:Leucine Rich repeats (2 copies)
27	MELO3C004318.2	1.9307	1.9899	1.3603	2.857	4.4721	2.9118	16.332	16.8732	13.4904	32.9639	30.4834	32.421	chr05	26377701	26379528	+	--	--	putative disease resistance protein [Cucumis melo var. makuwa]	DRL16_ARATH RecName: Full=Probable disease resistance protein At1g61190;	A0A1S3C0S8_CUCME SubName: Full=probable disease resistance protein At1g61180 {ECO:0000313|RefSeq:XP_008455319.2};	Apoptotic ATPase	GO:0043531,ADP binding; GO:0005524,ATP binding; GO:0006952,defense response; GO:0000166,nucleotide binding; GO:0003674,molecular_function; GO:0005488,binding; GO:0017076,purine nucleotide binding; GO:0030554,adenyl nucleotide binding; GO:0032553,ribonucleotide binding; GO:0032555,purine ribonucleotide binding; GO:0032559,adenyl ribonucleotide binding; GO:0036094,small molecule binding; GO:0043167…	PF12799.10:Leucine Rich repeats (2 copies)
28	MELO3C004321.2	1.0048	1.1356	1.0252	2.5106	3.1619	2.89	6.0643	6.0778	4.8526	13.2729	12.03	14.2908	chr05	26446783	26457878	+	--	--	vat protein [Cucumis melo]	DRL16_ARATH RecName: Full=Probable disease resistance protein At1g61190;	A0A1S3C0S8_CUCME SubName: Full=probable disease resistance protein At1g61180 {ECO:0000313|RefSeq:XP_008455319.2};	Apoptotic ATPase	GO:0043531,ADP binding; GO:0005524,ATP binding; GO:0006952,defense response; GO:0000166,nucleotide binding; GO:0003674,molecular_function; GO:0005488,binding; GO:0017076,purine nucleotide binding; GO:0030554,adenyl nucleotide binding; GO:0032553,ribonucleotide binding; GO:0032555,purine ribonucleotide binding; GO:0032559,adenyl ribonucleotide binding; GO:0036094,small molecule binding; GO:0043167…	PF00931.25:NB-ARC domain
29	MELO3C004339.2	0.1685	0.2152	0.2362	0.14	0.1406	0.2253	0.5566	0.547	0.4045	0.4727	0.5463	0.5717	chr05	26664862	26679936	+	--	--	coiled-coil domain-containing protein SCD2 isoform X1 [Cucumis melo]	SCD2_ARATH RecName: Full=Coiled-coil domain-containing protein SCD2 {ECO:0000305}; AltName: Full=Protein STOMATAL CYTOKINESIS DEFECTIVE 2 {ECO:0000303|PubMed:24179130};	A0A1S3C153_CUCME SubName: Full=coiled-coil domain-containing protein SCD2 isoform X1 {ECO:0000313|RefSeq:XP_008455538.1, ECO:0000313|RefSeq:XP_008455544.1};	--	GO:0030136,clathrin-coated vesicle; GO:0005886,plasma membrane; GO:0000911,cytokinesis by cell plate formation; GO:0009825,multidimensional cell growth; GO:0040008,regulation of growth; GO:0000910,cytokinesis; GO:0007049,cell cycle; GO:0008150,biological_process; GO:0009987,cellular process; GO:0022402,cell cycle process; GO:0051301,cell division; GO:0016049,cell growth; GO:0040007,growth; GO:005…	--
30	MELO3C004428.2	54.6449	70.914	63.439	35.4906	79.8772	69.3087	77.2655	166.487	321.333	179.075	138.077	274.323	chr05	27396867	27398715	+	K07198 5'-AMP-activated protein kinase, catalytic alpha subunit [EC:2.7.11.11] | (RefSeq) CBL-interacting serine/threonine-protein kinase 6-like (A)	--	CBL-interacting serine/threonine-protein kinase 6-like [Cucumis melo]	CIPK6_ARATH RecName: Full=CBL-interacting serine/threonine-protein kinase 6; EC=2.7.11.1; AltName: Full=SNF1-related kinase 3.14; AltName: Full=SOS2-like protein kinase PKS4; AltName: Full=SOS3-interacting protein 3;	A0A5D3BFR3_CUCME RecName: Full=Non-specific serine/threonine protein kinase {ECO:0000256|ARBA:ARBA00012513}; EC=2.7.11.1 {ECO:0000256|ARBA:ARBA00012513};	Serine/threonine protein kinase	GO:0005783,endoplasmic reticulum; GO:0005524,ATP binding; GO:0106310,protein serine kinase activity; GO:0004674,protein serine/threonine kinase activity; GO:0010540,basipetal auxin transport; GO:0042538,hyperosmotic salinity response; GO:0006468,protein phosphorylation; GO:0051592,response to calcium ion; GO:0009651,response to salt stress; GO:0009414,response to water deprivation; GO:0007165,sig…	PF00069.28:Protein kinase domain
31	MELO3C004465.2	15.0088	25.1586	19.7226	11.1849	12.863	13.5073	15.8582	76.3689	89.6237	50.5357	51.703	53.6154	chr05	27767414	27768407	-	K13448 calcium-binding protein CML | (RefSeq) calmodulin-like protein 3 (A)	ko04626: Plant-pathogen interaction	calmodulin-like protein 7 [Cucumis melo]	CML2_ARATH RecName: Full=Calmodulin-like protein 2; AltName: Full=Protein UNFERTILIZED EMBRYO SAC 14;	A0A1S3C5X4_CUCME SubName: Full=calmodulin-like protein 7 {ECO:0000313|RefSeq:XP_008457058.1};	Calmodulin and related proteins (EF-Hand superfamily)	GO:0005737,cytoplasm; GO:0005509,calcium ion binding; GO:0009567,double fertilization forming a zygote and endosperm; GO:0003674,molecular_function; GO:0005488,binding; GO:0043167,ion binding; GO:0043169,cation binding; GO:0046872,metal ion binding; GO:0000003,reproduction; GO:0008150,biological_process; GO:0009566,fertilization; GO:0019953,sexual reproduction; GO:0022414,reproductive process; GO…	PF00036.35:EF hand
32	MELO3C004655.2	2.6622	4.1263	2.7267	5.6563	8.5462	6.9811	3.9016	11.5337	19.9107	20.083	15.6697	19.6558	chr05	29197334	29199790	+	K13430 serine/threonine-protein kinase PBS1 [EC:2.7.11.1] | (RefSeq) serine/threonine-protein kinase PBS1 (A)	ko04626: Plant-pathogen interaction	serine/threonine-protein kinase RIPK [Cucumis melo]	RIPK_ARATH RecName: Full=Serine/threonine-protein kinase RIPK {ECO:0000305}; EC=2.7.11.1 {ECO:0000305|PubMed:21320696}; AltName: Full=ACIK1A/PBL14; AltName: Full=ACRE protein ortholog 264A {ECO:0000305}; Short=AtACRE264a {ECO:0000303|PubMed:15181213}; AltName: Full=PBS1-like protein 14 {ECO:0000303|PubMed:20413097}; AltName: Full=RPM1-induced protein kinase {ECO:0000303|PubMed:21320696};	A0A1S3CBK6_CUCME SubName: Full=serine/threonine-protein kinase At5g01020 {ECO:0000313|RefSeq:XP_008459841.1};	Serine/threonine protein kinase	GO:0005886,plasma membrane; GO:0005524,ATP binding; GO:0106310,protein serine kinase activity; GO:0004674,protein serine/threonine kinase activity; GO:0042742,defense response to bacterium; GO:0006468,protein phosphorylation; GO:0000166,nucleotide binding; GO:0003674,molecular_function; GO:0005488,binding; GO:0017076,purine nucleotide binding; GO:0030554,adenyl nucleotide binding; GO:0032553,ribo…	PF07714.20:Protein tyrosine and serine/threonine kinase
33	MELO3C004702.2	10.088	29.9784	13.9676	12.2176	13.3007	14.3998	11.8571	90.5096	146.293	33.8837	37.5335	53.2473	chr12	12080401	12083414	-	K13448 calcium-binding protein CML | (RefSeq) probable calcium-binding protein CML48 (A)	ko04626: Plant-pathogen interaction	probable calcium-binding protein CML48 [Cucumis melo]	CML48_ARATH RecName: Full=Probable calcium-binding protein CML48; AltName: Full=Calmodulin-like protein 48;	A0A5D3E617_CUCME SubName: Full=Putative calcium-binding protein CML48 {ECO:0000313|EMBL:TYK31060.1};	Ca2+-binding protein, EF-Hand protein superfamily	GO:0005509,calcium ion binding; GO:0003674,molecular_function; GO:0005488,binding; GO:0043167,ion binding; GO:0043169,cation binding; GO:0046872,metal ion binding	PF00036.35:EF hand
34	MELO3C004742.2	0.0431	0.4479	0.0226	0.3865	0.4851	0.3226	0.1841	7.4865	48.5884	0.8383	1.6525	1.259	chr12	11186253	11188948	-	K20624 12-hydroxyjasmonoyl-L-amino acid 12-hydroxylase / fatty acid hydroxylase [EC:1.14.14.49] | (RefSeq) cytochrome P450 94C1 (A)	--	cytochrome P450 94C1 [Cucumis melo]	C94C1_ARATH RecName: Full=Cytochrome P450 94C1 {ECO:0000305}; EC=1.14.14.49 {ECO:0000269|PubMed:22215670, ECO:0000269|PubMed:26164240}; AltName: Full=12-hydroxyjasmonoyl-L-amino acid 12-hydroxylase {ECO:0000303|PubMed:22215670};	A0A5D3DQ35_CUCME SubName: Full=Cytochrome P450 94C1 {ECO:0000313|EMBL:TYK25763.1};	Cytochrome P450 CYP4/CYP19/CYP26 subfamilies	GO:0005789,endoplasmic reticulum membrane; GO:0016021,integral component of membrane; GO:0043231,intracellular membrane-bounded organelle; GO:0018685,alkane 1-monooxygenase activity; GO:0020037,heme binding; GO:0005506,iron ion binding; GO:0009611,response to wounding; GO:0003674,molecular_function; GO:0003824,catalytic activity; GO:0004497,monooxygenase activity; GO:0016491,oxidoreductase activi…	PF00067.25:Cytochrome P450
35	MELO3C004795.2	6.3423	16.2615	8.1014	7.3396	22.512	9.7711	20.6135	50.8275	72.5088	74.4207	105.902	96.4579	chr12	10109099	10110560	-	K05359 arogenate/prephenate dehydratase [EC:4.2.1.91 4.2.1.51] | (RefSeq) arogenate dehydratase/prephenate dehydratase 6, chloroplastic-like (A)	ko00400: Phenylalanine, tyrosine and tryptophan biosynthesis; ko01100: Metabolic pathways; ko01110: Biosynthesis of secondary metabolites; ko01230: Biosynthesis of amino acids	arogenate dehydratase/prephenate dehydratase 6 [Cucumis melo var. makuwa]	AROD3_ARATH RecName: Full=Arogenate dehydratase 3, chloroplastic {ECO:0000303|PubMed:17726025}; Short=AtADT3 {ECO:0000303|PubMed:17726025}; EC=4.2.1.91 {ECO:0000269|PubMed:17726025}; AltName: Full=Prephenate dehydratase 1 {ECO:0000305}; Short=AtPDT1 {ECO:0000305}; Flags: Precursor;	A0A5A7VFN1_CUCME RecName: Full=Arogenate dehydratase {ECO:0000256|ARBA:ARBA00013259, ECO:0000256|RuleBase:RU363004}; EC=4.2.1.91 {ECO:0000256|ARBA:ARBA00013259, ECO:0000256|RuleBase:RU363004};	Prephenate dehydratase	GO:0009507,chloroplast; GO:0009570,chloroplast stroma; GO:0005737,cytoplasm; GO:0005829,cytosol; GO:0047769,arogenate dehydratase activity; GO:0004664,prephenate dehydratase activity; GO:0009094,L-phenylalanine biosynthetic process; GO:0010244,response to low fluence blue light stimulus by blue low-fluence system; GO:0006571,tyrosine biosynthetic process; GO:0003674,molecular_function; GO:0003824…	PF00800.21:Prephenate dehydratase
36	MELO3C004914.2	0.3321	1.0905	0.1309	0.2483	0.1558	0.0888	0.8711	4.5713	3.5871	2.882	16.8219	4.1598	chr12	7023508	7023819	+	--	--	Cystatin Hv-CPI6 [Cucumis melo var. makuwa]	CYT4_ARATH RecName: Full=Cysteine proteinase inhibitor 4; Short=AtCYS-4; Flags: Precursor;	A0A5A7SX36_CUCME SubName: Full=Cystatin Hv-CPI6 {ECO:0000313|EMBL:KAA0033827.1};	--	GO:0005829,cytosol; GO:0005576,extracellular region; GO:0000325,plant-type vacuole; GO:0009506,plasmodesma; GO:0099503,secretory vesicle; GO:0005773,vacuole; GO:0004869,cysteine-type endopeptidase inhibitor activity; GO:0006952,defense response; GO:0003674,molecular_function; GO:0004857,enzyme inhibitor activity; GO:0004866,endopeptidase inhibitor activity; GO:0030234,enzyme regulator activity; G…	PF16845.8:Aspartic acid proteinase inhibitor
37	MELO3C004922.2	1.4353	0.7499	0.5144	0.1626	0.3266	0.2327	3.3975	6.2319	9.3593	4.1525	6.7688	6.1638	chr12	6805001	6808300	-	K01674 carbonic anhydrase [EC:4.2.1.1] | (RefSeq) alpha carbonic anhydrase 7-like (A)	ko00910: Nitrogen metabolism; ko01100: Metabolic pathways	alpha carbonic anhydrase 7-like isoform X2 [Cucumis melo]	ATCA7_ARATH RecName: Full=Alpha carbonic anhydrase 7; Short=AtaCA7; Short=AtalphaCA7; EC=4.2.1.1; AltName: Full=Alpha carbonate dehydratase 7; Flags: Precursor;	A0A1S3CHT8_CUCME RecName: Full=Carbonic anhydrase {ECO:0000256|ARBA:ARBA00012925, ECO:0000256|RuleBase:RU367011}; EC=4.2.1.1 {ECO:0000256|ARBA:ARBA00012925, ECO:0000256|RuleBase:RU367011};	Carbonic anhydrase	GO:0009570,chloroplast stroma; GO:0004089,carbonate dehydratase activity; GO:0016836,hydro-lyase activity; GO:0008270,zinc ion binding; GO:0006730,one-carbon metabolic process; GO:0003674,molecular_function; GO:0003824,catalytic activity; GO:0016829,lyase activity; GO:0016835,carbon-oxygen lyase activity; GO:0005488,binding; GO:0043167,ion binding; GO:0043169,cation binding; GO:0046872,metal ion …	PF00194.24:Eukaryotic-type carbonic anhydrase
38	MELO3C005042.2	1.8021	2.0714	1.5314	1.7819	2.2551	2.2281	3.5602	5.8844	5.9181	4.5344	3.9845	5.2364	chr12	4052954	4057428	+	K13418 somatic embryogenesis receptor kinase 1 [EC:2.7.10.1 2.7.11.1] | (RefSeq) somatic embryogenesis receptor kinase 2-like (A)	--	probable LRR receptor-like serine/threonine-protein kinase RKF3 [Cucumis melo]	RKF3_ARATH RecName: Full=Probable LRR receptor-like serine/threonine-protein kinase RKF3; EC=2.7.11.1; AltName: Full=Receptor-like kinase in flowers 3; Flags: Precursor;	A0A5A7UTA1_CUCME SubName: Full=Putative LRR receptor-like serine/threonine-protein kinase RKF3 {ECO:0000313|EMBL:KAA0056749.1};	Serine/threonine protein kinase	GO:0016021,integral component of membrane; GO:0005886,plasma membrane; GO:0005524,ATP binding; GO:0106310,protein serine kinase activity; GO:0004674,protein serine/threonine kinase activity; GO:0006468,protein phosphorylation; GO:0000166,nucleotide binding; GO:0003674,molecular_function; GO:0005488,binding; GO:0017076,purine nucleotide binding; GO:0030554,adenyl nucleotide binding; GO:0032553,rib…	PF00069.28:Protein kinase domain
39	MELO3C005099.2	0.8542	1.7431	1.2947	0.7567	0.8717	0.7809	3.3939	8.3415	10.0199	2.8793	4.0065	3.3506	chr09	17113085	17116207	+	K13416 brassinosteroid insensitive 1-associated receptor kinase 1 [EC:2.7.10.1 2.7.11.1] | (RefSeq) BRASSINOSTEROID INSENSITIVE 1-associated receptor kinase 1-like (A)	ko04016: MAPK signaling pathway - plant; ko04075: Plant hormone signal transduction; ko04626: Plant-pathogen interaction	LRR receptor-like serine/threonine-protein kinase RPK2 [Cucumis melo]	RPK2_ARATH RecName: Full=LRR receptor-like serine/threonine-protein kinase RPK2; EC=2.7.11.1; AltName: Full=Protein TOADSTOOL 2; AltName: Full=Receptor-like protein kinase 2; Flags: Precursor;	A0A1S4DSB8_CUCME SubName: Full=LRR receptor-like serine/threonine-protein kinase RPK2 {ECO:0000313|RefSeq:XP_016898879.1};	--	GO:0016021,integral component of membrane; GO:0005886,plasma membrane; GO:0005524,ATP binding; GO:0106310,protein serine kinase activity; GO:0004674,protein serine/threonine kinase activity; GO:0048653,anther development; GO:0048508,embryonic meristem development; GO:0009808,lignin metabolic process; GO:0009942,longitudinal axis specification; GO:0010073,meristem maintenance; GO:0009846,pollen ge…	PF00069.28:Protein kinase domain
40	MELO3C005145.2	0	0	0	0	0	0	9.3689	5.1497	2.0662	13.6242	11.6273	12.0635	chr09	17734509	17734898	+	--	--	--	--	--	--	--	--
41	MELO3C005206.2	1.6345	1.2882	1.5808	2.0534	2.1066	2.3258	1.804	3.6246	4.3128	8.3052	3.4975	9.0774	chr09	18528401	18534942	+	--	--	uncharacterized protein E5676_scaffold174G00810 [Cucumis melo var. makuwa]	--	A0A5D3BG94_CUCME RecName: Full=DEP domain-containing protein {ECO:0000259|PROSITE:PS50186};	--	GO:0097573,glutathione oxidoreductase activity; GO:0035556,intracellular signal transduction; GO:0003674,molecular_function; GO:0003824,catalytic activity; GO:0015035,protein disulfide oxidoreductase activity; GO:0015036,disulfide oxidoreductase activity; GO:0016491,oxidoreductase activity; GO:0016667,oxidoreductase activity, acting on a sulfur group of donors; GO:0007154,cell communication; GO:0…	PF04784.17:Protein of unknown function, DUF547
42	MELO3C005214.2	4.6147	5.5978	4.7201	1.4301	1.9509	5.8492	12.0208	11.1195	9.2695	20.8628	13.0074	51.4955	chr09	18650323	18652078	-	--	--	defensin J1-2-like [Cucumis melo]	DEF2_CAPAN RecName: Full=Defensin J1-2; Flags: Precursor;	A0A1S3CRW6_CUCME SubName: Full=defensin J1-2-like {ECO:0000313|RefSeq:XP_008466730.2};	--	GO:0005576,extracellular region; GO:0050832,defense response to fungus; GO:0031640,killing of cells of other organism; GO:0006950,response to stress; GO:0006952,defense response; GO:0008150,biological_process; GO:0009605,response to external stimulus; GO:0009607,response to biotic stimulus; GO:0009620,response to fungus; GO:0043207,response to external biotic stimulus; GO:0044419,biological proce…	PF00304.23:Gamma-thionin family
43	MELO3C005224.2	0.4782	1.5921	0.7331	1.331	1.5457	1.6556	5.7607	6.2542	5.0965	7.5876	3.9727	6.2398	chr09	18743563	18745608	+	K01580 glutamate decarboxylase [EC:4.1.1.15] | (RefSeq) glutamate decarboxylase 4-like (A)	ko00250: Alanine, aspartate and glutamate metabolism; ko00410: beta-Alanine metabolism; ko00430: Taurine and hypotaurine metabolism; ko00650: Butanoate metabolism; ko01100: Metabolic pathways; ko01110: Biosynthesis of secondary metabolites	glutamate decarboxylase 4-like [Cucumis melo]	DCE4_ARATH RecName: Full=Glutamate decarboxylase 4; Short=GAD 4; EC=4.1.1.15;	A0A1S3CS98_CUCME RecName: Full=Glutamate decarboxylase {ECO:0000256|ARBA:ARBA00012421, ECO:0000256|RuleBase:RU361171}; EC=4.1.1.15 {ECO:0000256|ARBA:ARBA00012421, ECO:0000256|RuleBase:RU361171};	Glutamate decarboxylase/sphingosine phosphate lyase	GO:0005829,cytosol; GO:0005739,mitochondrion; GO:0005516,calmodulin binding; GO:0004351,glutamate decarboxylase activity; GO:0030170,pyridoxal phosphate binding; GO:0006538,glutamate catabolic process; GO:0003674,molecular_function; GO:0005488,binding; GO:0005515,protein binding; GO:0003824,catalytic activity; GO:0016829,lyase activity; GO:0016830,carbon-carbon lyase activity; GO:0016831,carboxy-…	PF00282.22:Pyridoxal-dependent decarboxylase conserved domain
44	MELO3C005256.2	0.2437	0.1715	0.4941	0.1562	0.3267	0.6146	1.7047	3.2471	1.7449	2.6919	2.8217	4.7972	chr09	19502907	19503650	+	--	--	putative B3 domain-containing protein At3g24850 [Cucumis melo]	Y3485_ARATH RecName: Full=Putative B3 domain-containing protein At3g24850;	A0A1S3CSS4_CUCME SubName: Full=putative B3 domain-containing protein At3g24850 {ECO:0000313|RefSeq:XP_008467039.1};	--	GO:0005634,nucleus; GO:0003677,DNA binding; GO:0003674,molecular_function; GO:0003676,nucleic acid binding; GO:0005488,binding; GO:0097159,organic cyclic compound binding; GO:1901363,heterocyclic compound binding; GO:0005575,cellular_component; GO:0005622,intracellular anatomical structure; GO:0043226,organelle; GO:0043227,membrane-bounded organelle; GO:0043229,intracellular organelle; GO:0043231…	PF03754.16:B3 domain-containing protein At2g31720-like
45	MELO3C005393.2	4.8642	3.4133	3.2123	3.7308	3.2774	4.9818	13.4749	15.9784	12.9342	13.9085	15.7032	23.2413	chr09	21183200	21191657	+	K09264 MADS-box transcription factor, plant | (RefSeq) floral homeotic protein AGAMOUS (A)	--	hypothetical protein Csa_000572 [Cucumis sativus]	AGL42_ARATH RecName: Full=MADS-box protein AGL42; AltName: Full=Protein AGAMOUS-LIKE 42; AltName: Full=Protein FOREVER YOUNG FLOWER {ECO:0000303|PubMed:21689171};	A0A1S4E646_CUCME SubName: Full=MADS-box protein AGL42-like {ECO:0000313|RefSeq:XP_008467251.1, ECO:0000313|RefSeq:XP_016903703.1};	MADS box transcription factor	GO:0005634,nucleus; GO:0003700,DNA-binding transcription factor activity; GO:0000981,DNA-binding transcription factor activity, RNA polymerase II-specific; GO:0046983,protein dimerization activity; GO:0000978,RNA polymerase II cis-regulatory region sequence-specific DNA binding; GO:0009838,abscission; GO:0030154,cell differentiation; GO:0080187,floral organ senescence; GO:0010150,leaf senescence;…	PF00319.21:SRF-type transcription factor (DNA-binding and dimerisation domain)
46	MELO3C005612.2	0.1623	0	0.0512	0	0	0	36.8953	20.7177	29.564	0.9219	1.8416	2.6429	chr09	22935229	22936026	+	--	--	transcription factor bHLH118-like [Cucumis melo]	BH126_ARATH RecName: Full=Transcription factor bHLH126; AltName: Full=Basic helix-loop-helix protein 126; Short=AtbHLH126; Short=bHLH 126; AltName: Full=Transcription factor EN 3; AltName: Full=bHLH transcription factor bHLH126;	A0A1S4E655_CUCME SubName: Full=transcription factor bHLH126-like {ECO:0000313|RefSeq:XP_016903726.1};	--	GO:0090575,RNA polymerase II transcription regulator complex; GO:0000981,DNA-binding transcription factor activity, RNA polymerase II-specific; GO:0046983,protein dimerization activity; GO:0000977,RNA polymerase II transcription regulatory region sequence-specific DNA binding; GO:0006357,regulation of transcription by RNA polymerase II; GO:0003674,molecular_function; GO:0003700,DNA-binding transc…	--
47	MELO3C005638.2	0.0582	0.3345	0.2295	0.0871	0.2731	0	0.2036	3.5321	11.6193	1.24	1.1087	1.6406	chr09	23163851	23164740	-	--	--	BON1-associated protein 2-like [Cucumis melo var. makuwa]	--	A0A5A7THM0_CUCME SubName: Full=BON1-associated protein 2-like {ECO:0000313|EMBL:KAA0042790.1};	--	--	--
48	MELO3C005742.2	3.3674	7.1314	5.6574	1.4591	3.308	1.1785	6.7146	22.9177	35.1934	9.9326	11.479	15.6714	chr09	23893038	23893860	+	--	--	uncharacterized protein LOC103482814 [Cucumis melo]	--	A0A5D3C469_CUCME SubName: Full=Putative inactive serine/threonine-protein kinase slob1 isoform X1 {ECO:0000313|EMBL:TYK06094.1};	--	GO:0016301,kinase activity; GO:0016310,phosphorylation; GO:0003674,molecular_function; GO:0003824,catalytic activity; GO:0016740,transferase activity; GO:0016772,transferase activity, transferring phosphorus-containing groups; GO:0006793,phosphorus metabolic process; GO:0006796,phosphate-containing compound metabolic process; GO:0008150,biological_process; GO:0008152,metabolic process; GO:0009987…	--
49	MELO3C005992.2	0.7042	1.3277	0.7403	0.9558	1.175	5.4349	1.0796	5.1736	5.6128	11.8543	8.4567	41.2323	chr06	445895	447962	+	K09338 homeobox-leucine zipper protein | (RefSeq) homeobox-leucine zipper protein ATHB-7 (A)	--	homeobox-leucine zipper protein ATHB-7 [Cucumis melo var. makuwa]	ATB12_ARATH RecName: Full=Homeobox-leucine zipper protein ATHB-12; AltName: Full=HD-ZIP protein ATHB-12; AltName: Full=Homeodomain transcription factor ATHB-12;	A0A5A7U0W8_CUCME SubName: Full=Homeobox-leucine zipper protein ATHB-7 {ECO:0000313|EMBL:KAA0048858.1};	Transcription factor HEX, contains HOX and HALZ domains	GO:0005634,nucleus; GO:0003700,DNA-binding transcription factor activity; GO:0000981,DNA-binding transcription factor activity, RNA polymerase II-specific; GO:0043565,sequence-specific DNA binding; GO:0000976,transcription regulatory region sequence-specific DNA binding; GO:0045893,positive regulation of transcription, DNA-templated; GO:0009737,response to abscisic acid; GO:0006970,response to os…	PF00046.32:Homeodomain
50	MELO3C006172.2	0.5323	0.46	0.5301	1.9694	2.5241	2.6977	1.3882	1.3381	1.719	7.9137	5.1888	8.0941	chr06	1469613	1474082	+	K20495 long-chain fatty acid omega-monooxygenase [EC:1.14.14.80] | (RefSeq) cytochrome P450 704B1 (A)	ko00071: Fatty acid degradation; ko00073: Cutin, suberine and wax biosynthesis; ko01100: Metabolic pathways	cytochrome P450 704C1-like isoform X1 [Cucumis melo]	C04C1_PINTA RecName: Full=Cytochrome P450 704C1; EC=1.14.-.-; AltName: Full=Cytochrome P450 CYPD;	A0A1S3AW91_CUCME SubName: Full=cytochrome P450 704C1-like isoform X1 {ECO:0000313|RefSeq:XP_008438136.1};	Cytochrome P450 CYP4/CYP19/CYP26 subfamilies	GO:0016021,integral component of membrane; GO:0020037,heme binding; GO:0005506,iron ion binding; GO:0004497,monooxygenase activity; GO:0016705,oxidoreductase activity, acting on paired donors, with incorporation or reduction of molecular oxygen; GO:0003674,molecular_function; GO:0005488,binding; GO:0046906,tetrapyrrole binding; GO:0097159,organic cyclic compound binding; GO:1901363,heterocyclic c…	PF00067.25:Cytochrome P450
51	MELO3C006456.2	2.8615	3.9156	2.7768	1.262	2.8233	1.6878	9.8377	11.7087	6.8482	7.4682	40.025	10.4556	chr06	3358692	3359814	+	--	--	Protease inhibitor protein [Cucumis melo var. makuwa]	ITH5_CUCMA RecName: Full=Inhibitor of trypsin and hageman factor; AltName: Full=CMTI-V;	A0A5A7U4U0_CUCME SubName: Full=Protease inhibitor protein {ECO:0000313|EMBL:KAA0049286.1};	--	GO:0004867,serine-type endopeptidase inhibitor activity; GO:0009611,response to wounding; GO:0003674,molecular_function; GO:0004857,enzyme inhibitor activity; GO:0004866,endopeptidase inhibitor activity; GO:0030234,enzyme regulator activity; GO:0030414,peptidase inhibitor activity; GO:0061134,peptidase regulator activity; GO:0061135,endopeptidase regulator activity; GO:0098772,molecular function …	PF00280.21:Potato inhibitor I family
52	MELO3C006458.2	9.7066	13.1354	9.6914	2.1156	10.4372	9.3676	55.6747	54.267	59.942	29.5576	126.239	56.0638	chr06	3391406	3393375	+	--	--	Protease inhibitor protein [Cucumis melo var. makuwa]	ITH5_CUCMA RecName: Full=Inhibitor of trypsin and hageman factor; AltName: Full=CMTI-V;	A0A5A7U228_CUCME SubName: Full=Protease inhibitor protein {ECO:0000313|EMBL:KAA0049288.1};	--	GO:0004867,serine-type endopeptidase inhibitor activity; GO:0009611,response to wounding; GO:0003674,molecular_function; GO:0004857,enzyme inhibitor activity; GO:0004866,endopeptidase inhibitor activity; GO:0030234,enzyme regulator activity; GO:0030414,peptidase inhibitor activity; GO:0061134,peptidase regulator activity; GO:0061135,endopeptidase regulator activity; GO:0098772,molecular function …	PF00280.21:Potato inhibitor I family
53	MELO3C006529.2	1.0832	0.7847	1.0047	5.4795	5.8003	5.3259	4.6058	4.7616	4.8456	14.8057	11.4652	9.8527	chr06	3946801	3949008	+	K23541 Ca2+/H+ antiporter, TMEM165/GDT1 family | (RefSeq) putative pentatricopeptide repeat-containing protein At3g23330 (A)	--	pentatricopeptide repeat-containing protein At4g14850 [Cucumis melo]	PP312_ARATH RecName: Full=Pentatricopeptide repeat-containing protein At4g14850; AltName: Full=Protein LOVASTATIN INSENSITIVE 1;	A0A5A7U206_CUCME SubName: Full=Pentatricopeptide repeat-containing protein {ECO:0000313|EMBL:KAA0049360.1};	FOG: PPR repeat	GO:0043231,intracellular membrane-bounded organelle; GO:0005739,mitochondrion; GO:0003729,mRNA binding; GO:0000166,nucleotide binding; GO:0034046,poly(G) binding; GO:0003723,RNA binding; GO:0008270,zinc ion binding; GO:0019288,isopentenyl diphosphate biosynthetic process, methylerythritol 4-phosphate pathway; GO:0019287,isopentenyl diphosphate biosynthetic process, mevalonate pathway; GO:0050790,…	PF01535.23:PPR repeat
54	MELO3C006530.2	2.9953	2.186	2.3771	6.7638	5.8059	6.577	6.3682	6.2042	5.3801	16.4356	14.1069	11.5268	chr06	3948971	3952045	+	--	--	late embryogenesis abundant protein D-34 isoform X1 [Cucumis melo]	LEA34_GOSHI RecName: Full=Late embryogenesis abundant protein D-34; Short=LEA D-34;	A0A1S3AXM5_CUCME SubName: Full=late embryogenesis abundant protein D-34 {ECO:0000313|RefSeq:XP_008438669.1};	--	--	PF04927.15:Seed maturation protein
55	MELO3C006560.2	0.7505	0.9171	0.578	0.9919	3.1449	6.0315	4.3343	4.4916	4.4344	13.0826	9.7188	21.3724	chr06	4178077	4179560	-	K22683 aspartyl protease family protein [EC:3.4.23.-] | (RefSeq) aspartyl protease family protein 2 (A)	--	probable aspartic proteinase GIP2 [Cucumis melo]	GIP2_NICBE RecName: Full=Probable aspartic proteinase GIP2 {ECO:0000305}; EC=3.4.23.- {ECO:0000305}; AltName: Full=Glucanase inhibitor protein 2 {ECO:0000303|PubMed:28082413}; Short=NbGIP2 {ECO:0000303|PubMed:28082413}; Flags: Precursor;	A0A1S3AXR0_CUCME SubName: Full=basic 7S globulin-like {ECO:0000313|RefSeq:XP_008438715.1};	Aspartyl protease	GO:0048046,apoplast; GO:0004190,aspartic-type endopeptidase activity; GO:0006952,defense response; GO:0006508,proteolysis; GO:0003674,molecular_function; GO:0003824,catalytic activity; GO:0004175,endopeptidase activity; GO:0008233,peptidase activity; GO:0016787,hydrolase activity; GO:0070001,aspartic-type peptidase activity; GO:0140096,catalytic activity, acting on a protein; GO:0006950,response …	PF14541.9:Xylanase inhibitor C-terminal
56	MELO3C006727.2	3.1043	11.6338	3.2467	16.329	40.5688	34.4106	6.0444	185.059	298.786	135.448	92.1484	145.484	chr06	5422623	5425838	-	--	--	alkaline/neutral invertase A, mitochondrial [Cucumis melo]	INVC_ARATH RecName: Full=Alkaline/neutral invertase C, mitochondrial {ECO:0000305}; Short=A/N-INVC {ECO:0000303|PubMed:21441406}; EC=3.2.1.26 {ECO:0000269|PubMed:23135328}; Flags: Precursor;	A0A1S3AX88_CUCME RecName: Full=Alkaline/neutral invertase {ECO:0000256|RuleBase:RU367047}; EC=3.2.1.26 {ECO:0000256|RuleBase:RU367047};	--	GO:0005739,mitochondrion; GO:0033926,glycopeptide alpha-N-acetylgalactosaminidase activity; GO:0004575,sucrose alpha-glucosidase activity; GO:0007623,circadian rhythm; GO:0010029,regulation of seed germination; GO:0048510,regulation of timing of transition from vegetative to reproductive phase; GO:0005987,sucrose catabolic process; GO:0003674,molecular_function; GO:0003824,catalytic activity; GO:…	PF12899.10:Alkaline and neutral invertase
57	MELO3C006824.2	0.4296	0.2665	0.271	0.5997	0.5913	0.9755	2.1816	2.4676	2.3926	5.1825	2.6697	5.5463	chr06	6413702	6424740	+	K01410 mitochondrial intermediate peptidase [EC:3.4.24.59] | (RefSeq) probable mitochondrial intermediate peptidase, mitochondrial (A)	--	mitochondrial intermediate peptidase, mitochondrial isoform X1 [Cucumis melo]	MIP_ARATH RecName: Full=Mitochondrial intermediate peptidase, mitochondrial {ECO:0000305}; EC=3.4.24.- {ECO:0000305}; AltName: Full=AtOCT1 {ECO:0000303|PubMed:25732537}; Flags: Precursor;	A0A1S3AYL6_CUCME SubName: Full=probable mitochondrial intermediate peptidase, mitochondrial isoform X1 {ECO:0000313|RefSeq:XP_008439103.1};	Metalloendopeptidase family - mitochondrial intermediate peptidase	GO:0009535,chloroplast thylakoid membrane; GO:0005739,mitochondrion; GO:0004177,aminopeptidase activity; GO:0046872,metal ion binding; GO:0004222,metalloendopeptidase activity; GO:0006518,peptide metabolic process; GO:0006508,proteolysis; GO:0003674,molecular_function; GO:0003824,catalytic activity; GO:0008233,peptidase activity; GO:0008238,exopeptidase activity; GO:0016787,hydrolase activity; GO…	PF01432.23:Peptidase family M3
58	MELO3C006852.2	1.3312	2.525	1.8277	3.467	4.071	20.6578	1.9133	18.4416	28.066	49.2029	41.5411	84.6389	chr06	6611233	6618192	+	K14497 protein phosphatase 2C [EC:3.1.3.16] | (RefSeq) probable protein phosphatase 2C 75 (A)	ko04016: MAPK signaling pathway - plant; ko04075: Plant hormone signal transduction	probable protein phosphatase 2C 75 isoform X1 [Cucumis melo]	P2C75_ARATH RecName: Full=Probable protein phosphatase 2C 75; Short=AtPP2C75; EC=3.1.3.16; AltName: Full=Protein ABA-HYPERSENSITIVE GERMINATION 1; AltName: Full=Protein phosphatase 2C AHG1; Short=PP2C AHG1;	A0A1S3AYN8_CUCME RecName: Full=Protein-serine/threonine phosphatase {ECO:0000256|ARBA:ARBA00013081}; EC=3.1.3.16 {ECO:0000256|ARBA:ARBA00013081};	Serine/threonine protein phosphatase	GO:0005634,nucleus; GO:0046872,metal ion binding; GO:0017018,myosin phosphatase activity; GO:0004722,protein serine/threonine phosphatase activity; GO:0035970,peptidyl-threonine dephosphorylation; GO:0009737,response to abscisic acid; GO:0003674,molecular_function; GO:0005488,binding; GO:0043167,ion binding; GO:0043169,cation binding; GO:0003824,catalytic activity; GO:0004721,phosphoprotein phosp…	PF00481.24:Protein phosphatase 2C
59	MELO3C006860.2	0.2359	0.3873	0.2976	0.2117	0.1328	0.4669	0.33	1.7761	3.7917	4.9881	1.4722	3.1398	chr06	6760704	6769520	-	K09264 MADS-box transcription factor, plant | (RefSeq) agamous-like MADS-box protein AGL6 (A)	--	MADS-box protein AGL42-like [Cucumis melo]	AGL42_ARATH RecName: Full=MADS-box protein AGL42; AltName: Full=Protein AGAMOUS-LIKE 42; AltName: Full=Protein FOREVER YOUNG FLOWER {ECO:0000303|PubMed:21689171};	A0A1S3AXN7_CUCME SubName: Full=MADS-box protein AGL42-like isoform X2 {ECO:0000313|RefSeq:XP_008439149.1};	MADS box transcription factor	GO:0005634,nucleus; GO:0003700,DNA-binding transcription factor activity; GO:0000981,DNA-binding transcription factor activity, RNA polymerase II-specific; GO:0046983,protein dimerization activity; GO:0000978,RNA polymerase II cis-regulatory region sequence-specific DNA binding; GO:0009838,abscission; GO:0030154,cell differentiation; GO:0080187,floral organ senescence; GO:0010150,leaf senescence;…	PF00319.21:SRF-type transcription factor (DNA-binding and dimerisation domain)
60	MELO3C006891.2	3.4679	11.112	5.1076	4.4663	5.2435	5.7845	4.6188	38.092	56.4216	21.1299	13.4005	23.6449	chr06	7024153	7026404	-	K09419 heat shock transcription factor, other eukaryote | (RefSeq) heat stress transcription factor B-2b-like (A)	--	heat stress transcription factor B-2b-like [Cucumis melo]	HFB2B_ORYSJ RecName: Full=Heat stress transcription factor B-2b; AltName: Full=Heat stress transcription factor 2; Short=rHsf2; AltName: Full=Heat stress transcription factor 21; Short=OsHsf-21;	A0A5A7SWJ4_CUCME SubName: Full=Heat stress transcription factor B-2b-like {ECO:0000313|EMBL:KAA0033627.1};	Heat shock transcription factor	GO:0005634,nucleus; GO:0003700,DNA-binding transcription factor activity; GO:0000978,RNA polymerase II cis-regulatory region sequence-specific DNA binding; GO:0006357,regulation of transcription by RNA polymerase II; GO:0003674,molecular_function; GO:0140110,transcription regulator activity; GO:0000976,transcription regulatory region sequence-specific DNA binding; GO:0000977,RNA polymerase II tra…	PF00447.20:HSF-type DNA-binding
61	MELO3C007054.2	2.9728	4.2293	3.4162	2.2861	2.9142	2.2792	2.2452	13.4579	22.1546	4.9381	8.7409	7.3126	chr08	491275	493426	+	K22395 cinnamyl-alcohol dehydrogenase [EC:1.1.1.195] | (RefSeq) flavin-dependent oxidoreductase FOX2-like (A)	ko00940: Phenylpropanoid biosynthesis; ko01100: Metabolic pathways; ko01110: Biosynthesis of secondary metabolites	berberine bridge enzyme-like 21 [Cucumis melo]	BBE21_ARATH RecName: Full=Berberine bridge enzyme-like 21 {ECO:0000303|PubMed:26037923}; Short=AtBBE-like 21 {ECO:0000303|PubMed:26037923}; EC=1.1.1.- {ECO:0000250|UniProtKB:O64743}; Flags: Precursor;	A0A1S3AZM6_CUCME SubName: Full=reticuline oxidase-like protein {ECO:0000313|RefSeq:XP_008439526.1};	--	GO:0048046,apoplast; GO:0005829,cytosol; GO:0009505,plant-type cell wall; GO:0005886,plasma membrane; GO:0071949,FAD binding; GO:0016899,oxidoreductase activity, acting on the CH-OH group of donors, oxygen as acceptor; GO:0000166,nucleotide binding; GO:0003674,molecular_function; GO:0005488,binding; GO:0036094,small molecule binding; GO:0043167,ion binding; GO:0043168,anion binding; GO:0050660,fl…	PF01565.26:FAD binding domain
62	MELO3C007266.2	1.8886	2.4366	2.3399	2.2194	3.0384	1.4433	4.0892	8.0347	8.6269	4.0447	8.6381	12.6745	chr08	1821077	1821268	-	--	--	hypothetical protein MUK42_35759 [Musa troglodytarum]	--	A0A5D2NLM3_GOSTO SubName: Full=Uncharacterized protein {ECO:0000313|EMBL:TYI04626.1};	--	--	--
63	MELO3C007297.2	1.56	1.4122	0.5046	7.269	15.7671	20.575	7.765	8.5185	15.1758	85.5959	31.6609	132.136	chr08	2017074	2018771	+	K01953 asparagine synthase (glutamine-hydrolysing) [EC:6.3.5.4] | (RefSeq) asparagine synthetase [glutamine-hydrolyzing] (A)	ko00250: Alanine, aspartate and glutamate metabolism; ko01100: Metabolic pathways; ko01110: Biosynthesis of secondary metabolites; ko01230: Biosynthesis of amino acids	stem-specific protein TSJT1-like isoform X2 [Cucumis melo]	TSJT1_TOBAC RecName: Full=Stem-specific protein TSJT1;	A0A1S3AZT6_CUCME SubName: Full=stem-specific protein TSJT1-like isoform X2 {ECO:0000313|RefSeq:XP_008439878.1};	--	--	PF12481.11:Aluminium induced protein
64	MELO3C007328.2	0.4918	4.4863	0.9478	7.0284	14.4615	8.5941	5.2877	28.6156	53.1724	36.6474	22.3225	43.8955	chr08	2211458	2211931	-	--	--	wound induced protein-like [Cucumis melo var. makuwa]	--	A0A5D3CPJ3_CUCME SubName: Full=Wound induced protein-like {ECO:0000313|EMBL:TYK13098.1};	--	--	PF12609.11:Wound-induced protein
65	MELO3C007431.2	12.4648	39.0533	21.3373	3.9286	21.9321	6.4127	16.3515	98.7343	166.878	55.2924	70.8524	86.2271	chr08	2753937	2755755	+	K04711 dihydroceramidase [EC:3.5.1.-] | (RefSeq) alkaline ceramidase 3 (A)	ko00600: Sphingolipid metabolism; ko01100: Metabolic pathways	alkaline ceramidase isoform X1 [Cucumis melo]	ACER_ARATH RecName: Full=Alkaline ceramidase {ECO:0000303|PubMed:25619405}; Short=AlkCDase {ECO:0000303|PubMed:25619405}; Short=Alkaline CDase {ECO:0000303|PubMed:25619405}; Short=AtACER {ECO:0000303|PubMed:25619405}; EC=3.5.1.- {ECO:0000305}; AltName: Full=Acyl-CoA independent ceramide synthase 1 {ECO:0000303|PubMed:23505340}; Short=AtCES1 {ECO:0000303|PubMed:23505340}; AltName: Full=Alkaline ce…	A0A1S3B0Z4_CUCME SubName: Full=alkaline ceramidase 3 {ECO:0000313|RefSeq:XP_008440061.1, ECO:0000313|RefSeq:XP_008440062.1};	Alkaline ceramidase	GO:0005783,endoplasmic reticulum; GO:0005789,endoplasmic reticulum membrane; GO:0005794,Golgi apparatus; GO:0000139,Golgi membrane; GO:0016021,integral component of membrane; GO:0005634,nucleus; GO:0016811,hydrolase activity, acting on carbon-nitrogen (but not peptide) bonds, in linear amides; GO:0046872,metal ion binding; GO:0009738,abscisic acid-activated signaling pathway; GO:0006914,autophagy…	PF05875.15:Ceramidase
66	MELO3C007491.2	0.6141	0.5402	0.4842	0.492	0.6175	0.4106	1.3552	2.0949	1.6679	1.6612	2.7553	1.2707	chr08	3129420	3130815	+	K20858 calcium uniporter protein, mitochondrial | (RefSeq) calcium uniporter protein 3, mitochondrial (A)	--	calcium uniporter protein 3, mitochondrial [Cucumis melo]	MCU3_ARATH RecName: Full=Calcium uniporter protein 3, mitochondrial; Flags: Precursor;	A0A1S3B0G9_CUCME RecName: Full=Calcium uniporter protein {ECO:0000256|RuleBase:RU367035};	Uncharacterized conserved protein	GO:0009941,chloroplast envelope; GO:0031305,integral component of mitochondrial inner membrane; GO:1990246,uniplex complex; GO:0005262,calcium channel activity; GO:0015292,uniporter activity; GO:0036444,calcium import into the mitochondrion; GO:0070509,calcium ion import; GO:0071456,cellular response to hypoxia; GO:0051560,mitochondrial calcium ion homeostasis; GO:0003674,molecular_function; GO:0…	PF04678.16:Mitochondrial calcium uniporter
67	MELO3C007531.2	7.02	7.9803	5.9606	1.4711	2.3529	1.4444	59.9001	76.3323	62.7669	9.8606	11.8022	11.1135	chr08	3406473	3408857	-	--	--	salicylic acid-binding protein 2-like [Cucumis melo]	SABP2_TOBAC RecName: Full=Salicylic acid-binding protein 2 {ECO:0000303|PubMed:14673096}; Short=NtSABP2 {ECO:0000303|PubMed:14673096}; EC=3.1.1.- {ECO:0000269|PubMed:15668381, ECO:0000269|PubMed:20797615}; AltName: Full=Methyl salicylate esterase {ECO:0000303|PubMed:17916738};	A0A5D3CPF7_CUCME SubName: Full=Salicylic acid-binding protein 2-like {ECO:0000313|EMBL:TYK12914.1};	--	GO:0016298,lipase activity; GO:0080030,methyl indole-3-acetate esterase activity; GO:0080032,methyl jasmonate esterase activity; GO:0080031,methyl salicylate esterase activity; GO:0045087,innate immune response; GO:0009694,jasmonic acid metabolic process; GO:0009696,salicylic acid metabolic process; GO:0009862,systemic acquired resistance, salicylic acid mediated signaling pathway; GO:0003674,mol…	PF12697.10:Alpha/beta hydrolase family
68	MELO3C007538.2	0.0475	0	0.1872	0.6391	0.2228	0.9906	1.0241	1.0938	1.7644	2.8098	2.2129	4.6841	chr08	3473211	3474943	+	--	--	uncharacterized protein LOC103484756 [Cucumis melo]	GEM_ARATH RecName: Full=GLABRA2 expression modulator;	A0A1S3B199_CUCME SubName: Full=uncharacterized protein LOC103484756 isoform X1 {ECO:0000313|RefSeq:XP_008440240.1};	--	GO:0005773,vacuole; GO:0051567,histone H3-K9 methylation; GO:0010482,regulation of epidermal cell division; GO:0048765,root hair cell differentiation; GO:0010026,trichome differentiation; GO:0006325,chromatin organization; GO:0006464,cellular protein modification process; GO:0006479,protein methylation; GO:0006807,nitrogen compound metabolic process; GO:0006996,organelle organization; GO:0008150,…	PF05659.14:Arabidopsis broad-spectrum mildew resistance protein RPW8
69	MELO3C007543.2	2.0349	2.3097	1.7005	2.1599	1.8834	3.2156	2.5912	5.8488	9.271	6.9552	3.7397	8.7666	chr08	3504725	3510666	+	K20717 mitogen-activated protein kinase kinase kinase YODA [EC:2.7.11.25] | (RefSeq) mitogen-activated protein kinase kinase kinase YODA-like (A)	ko04016: MAPK signaling pathway - plant	mitogen-activated protein kinase kinase kinase YODA isoform X1 [Cucumis melo var. makuwa]	M3K5G_ARATH RecName: Full=Mitogen-activated protein kinase kinase kinase 5 {ECO:0000303|PubMed:27679653}; EC=2.7.11.25 {ECO:0000269|PubMed:27679653}; AltName: Full=MAP3K gamma protein kinase {ECO:0000303|PubMed:10095117}; Short=AtMAP3Kgamma {ECO:0000303|PubMed:10095117};	A0A5D3CPE3_CUCME SubName: Full=Mitogen-activated protein kinase kinase kinase YODA isoform X1 {ECO:0000313|EMBL:TYK12904.1};	MEKK and related serine/threonine protein kinases	GO:0005737,cytoplasm; GO:0005829,cytosol; GO:0005886,plasma membrane; GO:0005524,ATP binding; GO:0004709,MAP kinase kinase kinase activity; GO:0106310,protein serine kinase activity; GO:0004674,protein serine/threonine kinase activity; GO:0050832,defense response to fungus; GO:0000165,MAPK cascade; GO:0002221,pattern recognition receptor signaling pathway; GO:0046777,protein autophosphorylation; …	PF00069.28:Protein kinase domain
70	MELO3C007627.2	0.8931	2.1042	0.9338	0.3339	1.1662	1.2204	1.5393	13.7243	14.6482	6.8479	2.4393	5.8375	chr08	4221883	4226154	-	K10523 speckle-type POZ protein | (RefSeq) BTB/POZ and MATH domain-containing protein 4 (A)	--	BTB/POZ and TAZ domain-containing protein 4 isoform X2 [Cucumis melo]	BT4_ARATH RecName: Full=BTB/POZ and TAZ domain-containing protein 4; AltName: Full=BTB and TAZ domain protein 4;	A0A1S3B1L9_CUCME SubName: Full=BTB/POZ and TAZ domain-containing protein 4 isoform X2 {ECO:0000313|RefSeq:XP_008440382.1};	CREB binding protein/P300 and related TAZ Zn-finger proteins	GO:0005737,cytoplasm; GO:0000325,plant-type vacuole; GO:0005516,calmodulin binding; GO:0046872,metal ion binding; GO:0016567,protein ubiquitination; GO:0006355,regulation of transcription, DNA-templated; GO:0009733,response to auxin; GO:0009739,response to gibberellin; GO:0042542,response to hydrogen peroxide; GO:0009753,response to jasmonic acid; GO:0009751,response to salicylic acid; GO:0009651…	PF00651.34:BTB/POZ domain
71	MELO3C007636.2	3.2146	4.2385	3.2111	6.3052	6.6218	7.5673	7.1146	11.4958	14.5731	23.9454	15.5507	24.6464	chr08	4284671	4289637	+	K01537 P-type Ca2+ transporter type 2C [EC:7.2.2.10] | (RefSeq) calcium-transporting ATPase 2, plasma membrane-type (A)	--	calcium-transporting ATPase 2, plasma membrane-type isoform X2 [Cucumis melo var. makuwa]	ACA2_ARATH RecName: Full=Calcium-transporting ATPase 2, plasma membrane-type; EC=7.2.2.10; AltName: Full=Ca(2+)-ATPase isoform 2;	A0A1S3B1S6_CUCME RecName: Full=Calcium-transporting ATPase {ECO:0000256|RuleBase:RU361146}; EC=7.2.2.10 {ECO:0000256|RuleBase:RU361146};	Calcium transporting ATPase	GO:0005783,endoplasmic reticulum; GO:0005789,endoplasmic reticulum membrane; GO:0005887,integral component of plasma membrane; GO:0043231,intracellular membrane-bounded organelle; GO:0016020,membrane; GO:0005524,ATP binding; GO:0016887,ATPase activity; GO:0019829,ATPase-coupled cation transmembrane transporter activity; GO:0015085,calcium ion transmembrane transporter activity; GO:0005516,calmodu…	PF00122.23:E1-E2 ATPase
72	MELO3C007644.2	0.7057	1.5838	0.4451	0.7037	1.1922	0.8935	1.9748	3.1724	2.4803	2.0789	4.5572	4.31	chr08	4321823	4324790	-	--	--	uncharacterized protein LOC103484864 [Cucumis melo]	--	A0A1S4DTC0_CUCME SubName: Full=uncharacterized protein LOC103484864 {ECO:0000313|RefSeq:XP_016899236.1};	--	--	PF14009.9:PADRE domain
73	MELO3C007850.2	0.2221	0.2652	0.0318	0.1812	0.2652	0.0756	1.8594	4.6961	12.4914	0.5734	0.8182	2.1812	chr08	5763327	5765019	-	K21483 salicylate 1-O-methyltransferase [EC:2.1.1.274] | (RefSeq) salicylate carboxymethyltransferase-like (A)	--	salicylate carboxymethyltransferase-like [Cucumis melo var. makuwa]	BSMT3_PETHY RecName: Full=S-adenosyl-L-methionine:benzoic acid/salicylic acid carboxyl methyltransferase 3 {ECO:0000303|Ref.1}; Short=PhBSMT3 {ECO:0000303|Ref.1}; EC=2.1.1.273 {ECO:0000250|UniProtKB:Q84UB5};	A0A1S3B2H0_CUCME SubName: Full=salicylate carboxymethyltransferase-like {ECO:0000313|RefSeq:XP_008440753.1};	--	GO:0046872,metal ion binding; GO:0008168,methyltransferase activity; GO:0019438,aromatic compound biosynthetic process; GO:0032259,methylation; GO:0003674,molecular_function; GO:0005488,binding; GO:0043167,ion binding; GO:0043169,cation binding; GO:0003824,catalytic activity; GO:0016740,transferase activity; GO:0016741,transferase activity, transferring one-carbon groups; GO:0006725,cellular arom…	PF03492.18:SAM dependent carboxyl methyltransferase
74	MELO3C007917.2	1.8979	1.5124	1.2763	1.0436	2.305	1.3139	3.6445	3.952	2.8944	3.7878	6.2891	4.8513	chr08	6236671	6238812	+	K22547 arsenate reductase [EC:1.20.4.1] | (RefSeq) rhodanese-like domain-containing protein 19, mitochondrial (A)	--	thiosulfate sulfurtransferase 18 isoform X1 [Cucumis melo]	STR18_ARATH RecName: Full=Thiosulfate sulfurtransferase 18; EC=2.8.1.1; AltName: Full=Sulfurtransferase 18; Short=AtStr18;	A0A1S3B1L3_CUCME SubName: Full=thiosulfate sulfurtransferase 18 isoform X1 {ECO:0000313|RefSeq:XP_008440833.1};	Rhodanese-related sulfurtransferase	GO:0005737,cytoplasm; GO:0004792,thiosulfate sulfurtransferase activity; GO:0003674,molecular_function; GO:0003824,catalytic activity; GO:0016740,transferase activity; GO:0016782,transferase activity, transferring sulfur-containing groups; GO:0016783,sulfurtransferase activity; GO:0005575,cellular_component; GO:0005622,intracellular anatomical structure; GO:0110165,cellular anatomical entity	PF00581.23:Rhodanese-like domain
75	MELO3C007919.2	1.67	1.7825	1.3766	6.1422	9.9453	9.0761	2.8941	4.5554	6.101	19.2624	26.8944	30.0146	chr08	6246062	6253749	+	K01191 alpha-mannosidase [EC:3.2.1.24] | (RefSeq) alpha-mannosidase (A)	ko00511: Other glycan degradation	alpha-mannosidase [Cucumis melo var. makuwa]	MANA3_ARATH RecName: Full=Probable alpha-mannosidase At5g66150 {ECO:0000305}; EC=3.2.1.24 {ECO:0000305}; Flags: Precursor;	A0A5D3CQ32_CUCME RecName: Full=Alpha-mannosidase {ECO:0000256|ARBA:ARBA00012752, ECO:0000256|RuleBase:RU361199}; EC=3.2.1.- {ECO:0000256|RuleBase:RU361199};	Glycosyl hydrolase, family 38 - alpha-mannosidase	GO:0005773,vacuole; GO:0004559,alpha-mannosidase activity; GO:0030246,carbohydrate binding; GO:0046872,metal ion binding; GO:0006013,mannose metabolic process; GO:0003674,molecular_function; GO:0003824,catalytic activity; GO:0004553,hydrolase activity, hydrolyzing O-glycosyl compounds; GO:0015923,mannosidase activity; GO:0016787,hydrolase activity; GO:0016798,hydrolase activity, acting on glycosy…	PF01074.25:Glycosyl hydrolases family 38 N-terminal domain
76	MELO3C007928.2	3.8593	4.3038	1.855	10.4948	9.7618	16.0638	9.2637	8.7668	4.8512	28.4969	21.3283	28.2778	chr08	6307657	6310711	+	--	--	GDSL esterase/lipase EXL3-like [Cucumis melo]	EXL3_ARATH RecName: Full=GDSL esterase/lipase EXL3; EC=3.1.1.-; AltName: Full=Family II extracellular lipase 3; Short=Family II lipase EXL3; Flags: Precursor;	A0A1S3B2Q1_CUCME SubName: Full=GDSL esterase/lipase EXL3-like {ECO:0000313|RefSeq:XP_008440851.1};	--	GO:0005783,endoplasmic reticulum; GO:0005576,extracellular region; GO:0016298,lipase activity; GO:0016042,lipid catabolic process; GO:0003674,molecular_function; GO:0003824,catalytic activity; GO:0016787,hydrolase activity; GO:0016788,hydrolase activity, acting on ester bonds; GO:0006629,lipid metabolic process; GO:0008150,biological_process; GO:0008152,metabolic process; GO:0009056,catabolic pro…	PF00657.25:GDSL-like Lipase/Acylhydrolase
77	MELO3C008082.2	0.3477	0.7612	0.5482	0.1733	0.1088	0.155	0.9458	20.1208	33.9507	4.2061	6.2465	9.0735	chr03	318768	319214	+	K09286 EREBP-like factor | (RefSeq) ethylene-responsive transcription factor RAP2-1 (A)	--	ethylene-responsive transcription factor ERF019 [Cucumis melo]	ERF19_ARATH RecName: Full=Ethylene-responsive transcription factor ERF019;	A0A5A7T282_CUCME SubName: Full=Ethylene-responsive transcription factor ERF019 {ECO:0000313|EMBL:KAA0037063.1};	--	GO:0005737,cytoplasm; GO:0005634,nucleus; GO:0003700,DNA-binding transcription factor activity; GO:0000976,transcription regulatory region sequence-specific DNA binding; GO:0042631,cellular response to water deprivation; GO:0009873,ethylene-activated signaling pathway; GO:0009620,response to fungus; GO:0003674,molecular_function; GO:0140110,transcription regulator activity; GO:0001067,regulatory …	PF00847.23:AP2 domain
78	MELO3C008095.2	4.1249	7.4173	3.9306	12.5846	19.1421	18.6345	5.7385	14.9871	21.0166	33.7045	34.1828	40.3602	chr03	481147	483193	-	K13420 LRR receptor-like serine/threonine-protein kinase FLS2 [EC:2.7.11.1] | (RefSeq) probable LRR receptor-like serine/threonine-protein kinase At3g47570 (A)	ko04016: MAPK signaling pathway - plant; ko04626: Plant-pathogen interaction	leucine-rich repeat receptor-like serine/threonine-protein kinase SKM1 [Cucumis melo]	PGIP2_ARATH RecName: Full=Polygalacturonase inhibitor 2; AltName: Full=Polygalacturonase-inhibiting protein 2; Short=PGIP-2; Flags: Precursor;	A0A5A7T0M6_CUCME SubName: Full=Putative inactive leucine-rich repeat receptor-like protein kinase {ECO:0000313|EMBL:KAA0037044.1};	FOG: Leucine rich repeat	GO:0005576,extracellular region; GO:0016020,membrane; GO:0009505,plant-type cell wall; GO:0009506,plasmodesma; GO:0090353,polygalacturonase inhibitor activity; GO:0003674,molecular_function; GO:0004857,enzyme inhibitor activity; GO:0030234,enzyme regulator activity; GO:0098772,molecular function regulator; GO:0005575,cellular_component; GO:0110165,cellular anatomical entity; GO:0005618,cell wall;…	PF13855.9:Leucine rich repeat
79	MELO3C008160.2	1.5086	1.6006	1.0247	1.6662	1.8296	1.9492	4.2482	3.4688	3.4097	6.3726	4.7029	4.7972	chr03	1263672	1269757	+	--	--	uncharacterized protein LOC103485457 isoform X1 [Cucumis melo]	--	A0A1S3B3Q2_CUCME SubName: Full=uncharacterized protein LOC103485457 isoform X1 {ECO:0000313|RefSeq:XP_008441275.1};	--	--	--
80	MELO3C008331.2	0.3167	0.4728	0.3178	0.646	0.4594	0.2234	0.4196	2.2975	6.0469	1.3632	3.2092	4.6217	chr03	3829132	3831312	-	K09286 EREBP-like factor | (RefSeq) ethylene-responsive transcription factor RAP2-3 (A)	--	ethylene-responsive transcription factor ERF113-like protein [Cucumis melo var. makuwa]	EF110_ARATH RecName: Full=Ethylene-responsive transcription factor ERF110;	A0A5A7UL07_CUCME SubName: Full=Ethylene-responsive transcription factor ERF113-like protein {ECO:0000313|EMBL:KAA0054976.1};	--	GO:0005634,nucleus; GO:0003677,DNA binding; GO:0003700,DNA-binding transcription factor activity; GO:0009873,ethylene-activated signaling pathway; GO:0045893,positive regulation of transcription, DNA-templated; GO:0048510,regulation of timing of transition from vegetative to reproductive phase; GO:0003674,molecular_function; GO:0003676,nucleic acid binding; GO:0005488,binding; GO:0097159,organic …	PF00847.23:AP2 domain
81	MELO3C008434.2	8.7327	13.6291	7.3542	12.9194	12.4329	17.7319	9.614	35.548	44.7902	39.2941	26.1874	44.538	chr03	6147870	6151344	+	--	--	target of Myb protein 1 [Cucumis melo var. makuwa]	TOL3_ARATH RecName: Full=TOM1-like protein 3 {ECO:0000305};	A0A5D3DJE5_CUCME SubName: Full=Target of Myb protein 1 {ECO:0000313|EMBL:TYK23786.1};	Cytosolic sorting protein GGA2/TOM1	GO:0016020,membrane; GO:0035091,phosphatidylinositol binding; GO:0043130,ubiquitin binding; GO:0043328,protein transport to vacuole involved in ubiquitin-dependent protein catabolic process via the multivesicular body sorting pathway; GO:0003674,molecular_function; GO:0005488,binding; GO:0005543,phospholipid binding; GO:0008289,lipid binding; GO:0005515,protein binding; GO:0032182,ubiquitin-like …	PF00790.22:VHS domain
82	MELO3C008477.2	3.9847	4.8362	3.2328	6.3484	9.5659	8.1327	6.4805	11.779	12.7014	12.8724	15.482	27.4006	chr03	7249146	7253410	-	K00797 spermidine synthase [EC:2.5.1.16] | (RefSeq) spermine synthase-like (A)	ko00270: Cysteine and methionine metabolism; ko00330: Arginine and proline metabolism; ko00480: Glutathione metabolism; ko01100: Metabolic pathways	spermine synthase-like [Cucumis melo]	SPSY_ARATH RecName: Full=Spermine synthase; Short=SPMSY; EC=2.5.1.22; AltName: Full=Spermidine aminopropyltransferase;	A0A5D3BTV3_CUCME SubName: Full=Spermine synthase-like {ECO:0000313|EMBL:TYK03151.1};	Spermidine synthase	GO:0004766,spermidine synthase activity; GO:0016768,spermine synthase activity; GO:0006596,polyamine biosynthetic process; GO:0006597,spermine biosynthetic process; GO:0003674,molecular_function; GO:0003824,catalytic activity; GO:0016740,transferase activity; GO:0016765,transferase activity, transferring alkyl or aryl (other than methyl) groups; GO:0006576,cellular biogenic amine metabolic proces…	PF01564.20:Spermine/spermidine synthase domain
83	MELO3C008912.2	1.1467	1.2337	0.6859	1.8038	1.8184	2.6865	4.3337	3.4217	2.5288	7.5193	5.6892	7.2448	chr08	23936084	23939914	+	K03351 anaphase-promoting complex subunit 4 | (RefSeq) anaphase-promoting complex subunit 4 (A)	ko04120: Ubiquitin mediated proteolysis	anaphase-promoting complex subunit 4 [Cucumis melo var. makuwa]	APC4_ARATH RecName: Full=Anaphase-promoting complex subunit 4; AltName: Full=Cyclosome subunit 4;	A0A5D3C2N0_CUCME SubName: Full=Anaphase-promoting complex subunit 4 {ECO:0000313|EMBL:TYK05458.1};	Anaphase-promoting complex (APC), subunit 4	GO:0005680,anaphase-promoting complex; GO:0034399,nuclear periphery; GO:0005634,nucleus; GO:0031145,anaphase-promoting complex-dependent catabolic process; GO:0007049,cell cycle; GO:0051301,cell division; GO:0009793,embryo development ending in seed dormancy; GO:0048481,plant ovule development; GO:0070979,protein K11-linked ubiquitination; GO:0030071,regulation of mitotic metaphase/anaphase trans…	PF12894.10:Anaphase-promoting complex subunit 4 WD40 domain
84	MELO3C008963.2	0.7208	0.8339	1.1367	1.1761	1.0147	1.4899	1.1651	4.6026	8.2681	9.462	3.4126	13.2116	chr08	22316561	22322493	+	K24917 amino acid permease | (RefSeq) amino acid permease 4-like (A)	--	amino acid permease 4-like [Cucumis melo]	AAP4_ARATH RecName: Full=Amino acid permease 4; AltName: Full=Amino acid transporter AAP4;	A0A5A7THZ0_CUCME SubName: Full=Amino acid permease 4-like {ECO:0000313|EMBL:KAA0041271.1};	Amino acid transporters	GO:0016021,integral component of membrane; GO:0016020,membrane; GO:0005886,plasma membrane; GO:0015172,acidic amino acid transmembrane transporter activity; GO:0015171,amino acid transmembrane transporter activity; GO:0015175,neutral amino acid transmembrane transporter activity; GO:0015399,primary active transmembrane transporter activity; GO:0015293,symporter activity; GO:0003333,amino acid tra…	PF01490.21:Transmembrane amino acid transporter protein
85	MELO3C009172.2	10.1976	25.1174	13.623	8.5887	7.9171	17.5802	12.5016	85.3027	73.0498	31.6502	41.4932	42.1765	chr04	33800864	33803738	-	--	--	E3 ubiquitin-protein ligase AIRP2 isoform X1 [Cucumis melo]	AIRP2_ARATH RecName: Full=E3 ubiquitin-protein ligase AIRP2 {ECO:0000305}; EC=2.3.2.27 {ECO:0000269|PubMed:21969385}; AltName: Full=Protein ABA INSENSITIVE RING PROTEIN 2 {ECO:0000303|PubMed:21969385}; Short=AtAIRP2 {ECO:0000303|PubMed:21969385}; AltName: Full=RING-type E3 ubiquitin transferase AIRP2 {ECO:0000305};	A0A5D3DMZ7_CUCME SubName: Full=E3 ubiquitin-protein ligase RNF8-B {ECO:0000313|EMBL:TYK24968.1};	Predicted E3 ubiquitin ligase	GO:0005829,cytosol; GO:0046872,metal ion binding; GO:0061630,ubiquitin protein ligase activity; GO:0004842,ubiquitin-protein transferase activity; GO:0009789,positive regulation of abscisic acid-activated signaling pathway; GO:0016567,protein ubiquitination; GO:0009737,response to abscisic acid; GO:0009651,response to salt stress; GO:0006511,ubiquitin-dependent protein catabolic process; GO:00036…	PF13920.9:Zinc finger, C3HC4 type (RING finger)
86	MELO3C009211.2	1.2738	1.255	1.8747	0.254	0.3985	0.2044	1.6831	6.0122	9.7606	0.67	2.65	2.2606	chr04	33564890	33565499	-	K14686 solute carrier family 31 (copper transporter), member 1 | (RefSeq) copper transporter 2-like (A)	--	copper transporter 4 [Cucumis melo var. makuwa]	COPT4_ARATH RecName: Full=Copper transporter 4; Short=AtCOPT4;	A0A5A7TLC7_CUCME RecName: Full=Copper transport protein {ECO:0000256|RuleBase:RU367022};	Copper transporter	GO:0016021,integral component of membrane; GO:0005886,plasma membrane; GO:0005375,copper ion transmembrane transporter activity; GO:0006878,cellular copper ion homeostasis; GO:0003674,molecular_function; GO:0005215,transporter activity; GO:0008324,cation transmembrane transporter activity; GO:0015075,ion transmembrane transporter activity; GO:0015318,inorganic molecular entity transmembrane trans…	PF04145.18:Ctr copper transporter family
87	MELO3C009339.2	2.0182	3.7283	2.0222	2.8928	2.8411	3.8801	5.7846	48.6926	80.8492	8.1613	15.2	23.703	chr04	32784388	32785619	-	--	--	uncharacterized protein LOC103486480 [Cucumis melo]	--	A0A5A7TR07_CUCME SubName: Full=Senescence regulator {ECO:0000313|EMBL:KAA0044011.1};	--	--	PF04520.16:Senescence regulator
88	MELO3C009540.2	9.2612	8.8026	7.6958	15.2596	15.7603	16.9497	12.2537	24.4213	35.7337	29.1688	36.3186	45.9742	chr04	31409375	31411537	+	--	--	protein LEAD-SENSITIVE 1-like [Cucumis melo]	PSE1_ARATH RecName: Full=Protein LEAD-SENSITIVE 1 {ECO:0000303|PubMed:27335453}; Short=Protein Pb-SENSITIVE 1 {ECO:0000303|PubMed:27335453};	A0A5D3DPY0_CUCME SubName: Full=Lecithin retinol acyltransferase {ECO:0000313|EMBL:TYK25320.1};	--	GO:0005737,cytoplasm; GO:0071284,cellular response to lead ion; GO:0015692,lead ion transport; GO:0046938,phytochelatin biosynthetic process; GO:0010288,response to lead ion; GO:0008150,biological_process; GO:0009987,cellular process; GO:0010035,response to inorganic substance; GO:0010038,response to metal ion; GO:0042221,response to chemical; GO:0050896,response to stimulus; GO:0051716,cellular …	PF04970.16:Lecithin retinol acyltransferase
89	MELO3C009569.2	4.4656	6.3125	6.1845	1.3939	1.4577	2.0981	5.4781	34.8235	34.3637	15.8711	7.0819	20.8569	chr04	31124988	31125654	+	--	--	uncharacterized protein LOC103486710 [Cucumis melo]	--	A0A5D3DQ13_CUCME SubName: Full=Uncharacterized protein {ECO:0000313|EMBL:TYK25350.1};	--	--	--
90	MELO3C009688.2	1.0266	0.9494	0.5861	0.8295	0.753	0.95	1.5615	2.6853	1.8253	1.8621	2.678	1.5891	chr04	30150051	30162676	-	K05681 ATP-binding cassette, subfamily G (WHITE), member 2 | (RefSeq) ABC transporter G family member 9-like (A)	ko02010: ABC transporters	pleiotropic drug resistance protein 3-like [Cucumis melo]	PDR3_TOBAC RecName: Full=Pleiotropic drug resistance protein 3; AltName: Full=NtPDR3;	A0A1S3B6X0_CUCME SubName: Full=pleiotropic drug resistance protein 3-like isoform X1 {ECO:0000313|RefSeq:XP_008443150.1};	Pleiotropic drug resistance proteins (PDR1-15), ABC superfamily	GO:0016021,integral component of membrane; GO:0140359,ABC-type transporter activity; GO:0005524,ATP binding; GO:0003674,molecular_function; GO:0003824,catalytic activity; GO:0005215,transporter activity; GO:0015399,primary active transmembrane transporter activity; GO:0016462,pyrophosphatase activity; GO:0016787,hydrolase activity; GO:0016817,hydrolase activity, acting on acid anhydrides; GO:0016…	PF01061.27:ABC-2 type transporter
91	MELO3C009715.2	0.171	0.1404	0.1011	0.4796	0.4146	0.6632	0.2243	0.4004	0.7636	1.2706	0.8143	1.7518	chr04	29948306	29954744	+	K10406 kinesin family member C2/C3 | (RefSeq) kinesin-3-like (A)	--	kinesin-like protein KIN-14P isoform X2 [Cucumis melo]	KN14O_ARATH RecName: Full=Kinesin-like protein KIN-14O {ECO:0000305};	A0A1S4DUV5_CUCME SubName: Full=LOW QUALITY PROTEIN: kinesin-3-like {ECO:0000313|RefSeq:XP_016899764.1};	Kinesin (KAR3 subfamily)	GO:0005874,microtubule; GO:0015630,microtubule cytoskeleton; GO:0005524,ATP binding; GO:0008017,microtubule binding; GO:0003777,microtubule motor activity; GO:0007018,microtubule-based movement; GO:0007017,microtubule-based process; GO:0000166,nucleotide binding; GO:0003674,molecular_function; GO:0005488,binding; GO:0017076,purine nucleotide binding; GO:0030554,adenyl nucleotide binding; GO:00325…	PF00225.26:Kinesin motor domain
92	MELO3C009818.2	25.5062	47.8732	34.0524	15.2887	39.6695	27.7291	41.1957	107.821	221.789	204.052	102.278	252.46	chr04	28972906	28973693	+	K13448 calcium-binding protein CML | (RefSeq) probable calcium-binding protein CML35 (A)	ko04626: Plant-pathogen interaction	probable calcium-binding protein CML35 [Cucumis melo]	CML35_ARATH RecName: Full=Probable calcium-binding protein CML35; AltName: Full=Calmodulin-like protein 1; AltName: Full=Calmodulin-like protein 35;	A0A5A7UEZ0_CUCME SubName: Full=Putative calcium-binding protein CML35 {ECO:0000313|EMBL:KAA0053814.1};	Calmodulin and related proteins (EF-Hand superfamily)	GO:0005829,cytosol; GO:0005509,calcium ion binding; GO:0003674,molecular_function; GO:0005488,binding; GO:0043167,ion binding; GO:0043169,cation binding; GO:0046872,metal ion binding; GO:0005575,cellular_component; GO:0005622,intracellular anatomical structure; GO:0005737,cytoplasm; GO:0110165,cellular anatomical entity	PF00036.35:EF hand
93	MELO3C009864.2	9.8669	12.9456	9.8769	16.8009	30.0951	21.9221	22.8948	32.0692	47.3375	79.5318	66.4705	66.3665	chr04	28646517	28651658	+	K15639 PHYB activation tagged suppressor 1 [EC:1.14.-.-] | (RefSeq) cytochrome P450 734A1 (A)	ko00905: Brassinosteroid biosynthesis; ko01110: Biosynthesis of secondary metabolites	cytochrome P450 CYP72A219-like [Cucumis melo]	C7A39_KALSE RecName: Full=Cytochrome P450 72A397; EC=1.14.14.- {ECO:0000269|PubMed:29186583};	A0A1S3B801_CUCME SubName: Full=cytochrome P450 CYP72A219-like {ECO:0000313|RefSeq:XP_008443405.1};	Cytochrome P450 CYP4/CYP19/CYP26 subfamilies	GO:0016021,integral component of membrane; GO:0020037,heme binding; GO:0005506,iron ion binding; GO:0016712,oxidoreductase activity, acting on paired donors, with incorporation or reduction of molecular oxygen, reduced flavin or flavoprotein as one donor, and incorporation of one atom of oxygen; GO:0016134,saponin metabolic process; GO:0003674,molecular_function; GO:0005488,binding; GO:0046906,te…	PF00067.25:Cytochrome P450
94	MELO3C009877.2	0.6852	0.7846	0.5971	1.2	1.2691	1.4613	1.5766	2.4416	2.5243	3.016	2.0753	6.4797	chr04	28473051	28477624	-	--	--	uncharacterized protein LOC103487008 isoform X2 [Cucumis melo]	--	A0A1S4DUT6_CUCME SubName: Full=uncharacterized protein LOC103487008 {ECO:0000313|RefSeq:XP_008443416.1, ECO:0000313|RefSeq:XP_016899752.1};	--	--	PF07891.15:Protein of unknown function (DUF1666)
95	MELO3C009886.2	2.9901	3.5569	2.5985	9.8783	12.1725	18.7326	8.2117	16.353	41.5052	44.2909	23.1696	58.8086	chr04	28405414	28409674	+	K23953 plant cysteine oxidase [EC:1.13.11.-] | (RefSeq) plant cysteine oxidase 2 (A)	--	plant cysteine oxidase 2 [Cucumis melo]	PCO2_ARATH RecName: Full=Plant cysteine oxidase 2 {ECO:0000303|PubMed:24599061}; Short=AtPCO2 {ECO:0000303|PubMed:33207269}; EC=1.13.11.20 {ECO:0000269|PubMed:24599061, ECO:0000269|PubMed:29848548, ECO:0000269|PubMed:33207269}; AltName: Full=Hypoxia-responsive unknown protein 43 {ECO:0000303|PubMed:20097791};	A0A5D3DPQ3_CUCME RecName: Full=Cysteine dioxygenase {ECO:0000256|ARBA:ARBA00013133}; EC=1.13.11.20 {ECO:0000256|ARBA:ARBA00013133};	Uncharacterized conserved protein	GO:0005829,cytosol; GO:0005634,nucleus; GO:0017172,cysteine dioxygenase activity; GO:0005506,iron ion binding; GO:0071456,cellular response to hypoxia; GO:0070483,detection of hypoxia; GO:0018171,peptidyl-cysteine oxidation; GO:0001666,response to hypoxia; GO:0003674,molecular_function; GO:0003824,catalytic activity; GO:0016491,oxidoreductase activity; GO:0016701,oxidoreductase activity, acting o…	PF07847.15:PCO_ADO
96	MELO3C010002.2	0.2853	0.3123	0.2999	0.2845	0.476	0.4749	0.6838	0.9441	0.6027	1.3257	0.8351	1.3404	chr02	11366510	11388017	+	K20667 beta-amyrin 28-monooxygenase [EC:1.14.14.126] | (RefSeq) beta-amyrin 28-oxidase (A)	--	beta-amyrin 28-monooxygenase [Cucumis melo]	C7A15_VITVI RecName: Full=Beta-amyrin 28-monooxygenase {ECO:0000305}; EC=1.14.14.126 {ECO:0000269|PubMed:22039103}; AltName: Full=Beta-amyrin 28-oxidase {ECO:0000305}; AltName: Full=Cytochrome P450 716A15 {ECO:0000303|PubMed:22039103}; Short=VvCYP716A15 {ECO:0000303|PubMed:22039103};	A0A1S3B8H4_CUCME SubName: Full=beta-amyrin 28-oxidase {ECO:0000313|RefSeq:XP_008443638.1};	Cytochrome P450 CYP4/CYP19/CYP26 subfamilies	GO:0016021,integral component of membrane; GO:0020037,heme binding; GO:0005506,iron ion binding; GO:0004497,monooxygenase activity; GO:0016491,oxidoreductase activity; GO:0016709,oxidoreductase activity, acting on paired donors, with incorporation or reduction of molecular oxygen, NAD(P)H as one donor, and incorporation of one atom of oxygen; GO:0102374,ursolic aldehyde 28-monooxygenase activity;…	PF00067.25:Cytochrome P450
97	MELO3C010005.2	0	0	0	0	0	0.0656	0.5243	1.5162	1.4486	5.4841	4.4241	5.57	chr02	11478134	11480487	-	--	--	uncharacterized protein LOC103487192 [Cucumis melo]	--	A0A1S3B9A9_CUCME SubName: Full=uncharacterized protein LOC103487192 {ECO:0000313|RefSeq:XP_008443644.1};	--	GO:0016021,integral component of membrane; GO:0005575,cellular_component; GO:0016020,membrane; GO:0031224,intrinsic component of membrane; GO:0110165,cellular anatomical entity	--
98	MELO3C010015.2	23.0185	23.2842	20.6029	11.3225	6.6359	4.9338	70.3411	175.721	261.295	67.9796	96.4654	47.6591	chr02	11735664	11739193	-	K16223 protein FLOWERING LOCUS T | (RefSeq) protein HEADING DATE 3A (A)	ko04712: Circadian rhythm - plant	protein HEADING DATE 3A [Cucumis sativus]	HD3A_ORYSJ RecName: Full=Protein HEADING DATE 3A; AltName: Full=FT-like protein A;	B9ZYL0_CUCSA SubName: Full=FT-like protein {ECO:0000313|EMBL:BAH28253.1};	Phosphatidylethanolamine binding protein	GO:0005737,cytoplasm; GO:0005634,nucleus; GO:0008429,phosphatidylethanolamine binding; GO:0030154,cell differentiation; GO:0009908,flower development; GO:0010229,inflorescence development; GO:0009909,regulation of flower development; GO:0048510,regulation of timing of transition from vegetative to reproductive phase; GO:0048572,short-day photoperiodism; GO:0048575,short-day photoperiodism, flower…	PF01161.23:Phosphatidylethanolamine-binding protein
99	MELO3C010056.2	0.428	0.3373	0.2969	0.3328	0.3856	0.2839	0.6387	0.9427	1.0948	0.9455	0.9019	1.0723	chr02	12757514	12759148	+	K19365 seipin | (RefSeq) seipin-1 (A)	--	seipin-1 [Cucumis melo]	SEI1_ARATH RecName: Full=Seipin-1 {ECO:0000303|PubMed:26362606}; Short=AtSEIPIN1 {ECO:0000303|PubMed:26362606};	A0A1S3B8L6_CUCME SubName: Full=seipin-1 {ECO:0000313|RefSeq:XP_008443693.1};	Uncharacterized conserved protein	GO:0005783,endoplasmic reticulum; GO:0030176,integral component of endoplasmic reticulum membrane; GO:0140042,lipid droplet formation; GO:0034389,lipid droplet organization; GO:0006629,lipid metabolic process; GO:0019915,lipid storage; GO:0009846,pollen germination; GO:0080155,regulation of double fertilization forming a zygote and endosperm; GO:0048316,seed development; GO:0010162,seed dormancy …	PF06775.17:Putative adipose-regulatory protein (Seipin)
100	MELO3C010177.2	4.1835	4.5207	4.317	0.299	0.6929	1.9911	18.3982	15.7979	12.5209	7.7425	5.5227	23.4584	chr02	15143975	15146205	+	--	--	WAT1-related protein At4g30420-like [Cucumis melo]	WTR37_ARATH RecName: Full=WAT1-related protein At4g30420;	A0A1S3B9M5_CUCME RecName: Full=WAT1-related protein {ECO:0000256|RuleBase:RU363077};	--	GO:0016021,integral component of membrane; GO:0005886,plasma membrane; GO:0022857,transmembrane transporter activity; GO:0003674,molecular_function; GO:0005215,transporter activity; GO:0005575,cellular_component; GO:0016020,membrane; GO:0031224,intrinsic component of membrane; GO:0110165,cellular anatomical entity; GO:0071944,cell periphery	PF00892.23:EamA-like transporter family
101	MELO3C010178.2	2.7506	2.5147	1.7584	0.845	0.5302	0.3738	8.9275	5.6309	3.8291	1.3609	1.398	2.8172	chr02	15148879	15155368	+	--	--	WAT1-related protein At4g30420-like [Cucumis melo]	WTR37_ARATH RecName: Full=WAT1-related protein At4g30420;	A0A1S3B8F0_CUCME RecName: Full=WAT1-related protein {ECO:0000256|RuleBase:RU363077};	--	GO:0016021,integral component of membrane; GO:0005886,plasma membrane; GO:0022857,transmembrane transporter activity; GO:0003674,molecular_function; GO:0005215,transporter activity; GO:0005575,cellular_component; GO:0016020,membrane; GO:0031224,intrinsic component of membrane; GO:0110165,cellular anatomical entity; GO:0071944,cell periphery	PF00892.23:EamA-like transporter family
102	MELO3C010236.2	0.9136	0.5251	1.0805	0.9565	0.4287	1.6128	2.0771	2.2074	1.9738	2.0905	3.5545	4.7211	chr02	15824482	15828973	+	--	--	--	--	--	--	--	--
103	MELO3C010423.2	14.5983	14.6007	13.1098	10.6134	12.3038	10.9478	20.1603	44.1993	33.2031	33.653	33.9828	34.1838	chr07	10255500	10260445	-	K10599 pre-mRNA-processing factor 19 [EC:2.3.2.27] | (RefSeq) pre-mRNA-processing factor 19 (A)	ko03040: Spliceosome; ko04120: Ubiquitin mediated proteolysis	putative WD repeat-containing protein C2A9.03 [Cucumis melo var. makuwa]	GBB_ORYSJ RecName: Full=Guanine nucleotide-binding protein subunit beta {ECO:0000305}; AltName: Full=WD40 repeat-containing protein 80 {ECO:0000303|PubMed:22429805}; Short=OsWD40-80 {ECO:0000303|PubMed:22429805};	A0A5D3D4W6_CUCME SubName: Full=Putative WD repeat-containing protein C2A9.03 {ECO:0000313|EMBL:TYK18597.1};	--	GO:0080008,Cul4-RING E3 ubiquitin ligase complex; GO:0005737,cytoplasm; GO:0005783,endoplasmic reticulum; GO:0005834,heterotrimeric G-protein complex; GO:0005886,plasma membrane; GO:0030159,signaling receptor complex adaptor activity; GO:0050832,defense response to fungus; GO:0030968,endoplasmic reticulum unfolded protein response; GO:0010154,fruit development; GO:0007186,G protein-coupled recept…	PF12894.10:Anaphase-promoting complex subunit 4 WD40 domain
104	MELO3C010497.2	0.1596	0.936	0.3236	0.3751	0.6847	0.6098	0.1329	5.3294	9.9307	2.7344	1.0349	2.642	chr07	8652302	8653828	-	K22683 aspartyl protease family protein [EC:3.4.23.-] | (RefSeq) aspartyl protease family protein 2 (A)	--	aspartic proteinase Asp1-like [Cucumis melo var. makuwa]	ASP1_ORYSI RecName: Full=Aspartic proteinase Asp1; Short=OSAP1; Short=OsAsp1; EC=3.4.23.-; AltName: Full=Nucellin-like protein; Flags: Precursor;	A0A5D3E3Y7_CUCME SubName: Full=Aspartic proteinase Asp1-like {ECO:0000313|EMBL:TYK30005.1};	Aspartyl protease	GO:0004190,aspartic-type endopeptidase activity; GO:0006508,proteolysis; GO:0003674,molecular_function; GO:0003824,catalytic activity; GO:0004175,endopeptidase activity; GO:0008233,peptidase activity; GO:0016787,hydrolase activity; GO:0070001,aspartic-type peptidase activity; GO:0140096,catalytic activity, acting on a protein; GO:0006807,nitrogen compound metabolic process; GO:0008150,biological_…	PF14543.9:Xylanase inhibitor N-terminal
105	MELO3C010762.2	4.5556	5.3939	3.2188	4.3065	5.0747	5.8431	5.6423	57.2718	85.5383	26.58	20.435	33.0648	chr03	31021479	31024977	+	K01772 protoporphyrin/coproporphyrin ferrochelatase [EC:4.98.1.1 4.99.1.9] | (RefSeq) ferrochelatase-2, chloroplastic (A)	ko00860: Porphyrin metabolism; ko01100: Metabolic pathways; ko01110: Biosynthesis of secondary metabolites; ko01240: Biosynthesis of cofactors	ferrochelatase-2, chloroplastic [Cucumis melo]	HEMH_CUCSA RecName: Full=Ferrochelatase-2, chloroplastic; EC=4.99.1.1; AltName: Full=Ferrochelatase II; AltName: Full=Heme synthase 2; AltName: Full=Protoheme ferro-lyase 2; Flags: Precursor;	A0A1S3BAE6_CUCME RecName: Full=Ferrochelatase {ECO:0000256|RuleBase:RU000607}; EC=4.99.1.1 {ECO:0000256|RuleBase:RU000607};	Protoheme ferro-lyase (ferrochelatase)	GO:0009507,chloroplast; GO:0004325,ferrochelatase activity; GO:0006783,heme biosynthetic process; GO:0003674,molecular_function; GO:0003824,catalytic activity; GO:0016829,lyase activity; GO:0006725,cellular aromatic compound metabolic process; GO:0006778,porphyrin-containing compound metabolic process; GO:0006779,porphyrin-containing compound biosynthetic process; GO:0006807,nitrogen compound met…	PF00762.22:Ferrochelatase
106	MELO3C010866.2	212.269	246.547	202.87	495.731	665.665	796.127	248.61	688.833	1222.8	3997.83	2224.78	3385.72	chr03	30320193	30320862	-	K13448 calcium-binding protein CML | (RefSeq) probable calcium-binding protein CML25 (A)	ko04626: Plant-pathogen interaction	putative calcium-binding protein CML10 [Cucumis melo var. makuwa]	CML17_ORYSJ RecName: Full=Probable calcium-binding protein CML17; AltName: Full=Calmodulin-like protein 17;	A0A5A7V4S6_CUCME SubName: Full=Putative calcium-binding protein CML10 {ECO:0000313|EMBL:KAA0060895.1};	Calmodulin and related proteins (EF-Hand superfamily)	GO:0005509,calcium ion binding; GO:0003674,molecular_function; GO:0005488,binding; GO:0043167,ion binding; GO:0043169,cation binding; GO:0046872,metal ion binding	PF00036.35:EF hand
107	MELO3C010870.2	3.0614	3.6705	1.6858	2.3257	2.6451	1.3778	6.5154	7.7545	5.7953	10.199	26.902	8.066	chr03	30301167	30301699	-	--	--	probable calcium-binding protein CML36 [Cucumis melo]	--	A0A1S3BD12_CUCME SubName: Full=probable calcium-binding protein CML36 {ECO:0000313|RefSeq:XP_008445562.1};	--	GO:0005509,calcium ion binding; GO:0003674,molecular_function; GO:0005488,binding; GO:0043167,ion binding; GO:0043169,cation binding; GO:0046872,metal ion binding	PF13499.9:EF-hand domain pair
108	MELO3C011007.2	1.723	1.1408	0.9203	0.665	0.6259	0.5798	2.5272	3.9975	2.5938	0.7894	4.7529	2.2194	chr03	29398594	29400773	+	--	--	WEB family protein At1g75720-like [Cucumis melo]	Y1572_ARATH RecName: Full=WEB family protein At1g75720;	A0A1S3BB69_CUCME SubName: Full=WEB family protein At1g75720-like {ECO:0000313|RefSeq:XP_008444801.1};	--	GO:0005829,cytosol; GO:0009904,chloroplast accumulation movement; GO:0009903,chloroplast avoidance movement; GO:0006996,organelle organization; GO:0008150,biological_process; GO:0009657,plastid organization; GO:0009658,chloroplast organization; GO:0009902,chloroplast relocation; GO:0009987,cellular process; GO:0016043,cellular component organization; GO:0019750,chloroplast localization; GO:005117…	--
109	MELO3C011035.2	34.0394	91.4552	43.073	31.1628	68.3825	37.7646	65.9944	191.285	250.066	128.323	256.455	180.831	chr03	29213456	29214938	-	--	--	protein PHOSPHATE-INDUCED 1-like [Cucumis melo]	PHI1_TOBAC RecName: Full=Protein PHOSPHATE-INDUCED 1 {ECO:0000303|PubMed:10189698}; Flags: Precursor;	A0A5A7V9Z1_CUCME SubName: Full=Protein EXORDIUM-like {ECO:0000313|EMBL:KAA0065142.1};	--	GO:0048046,apoplast; GO:0005615,extracellular space; GO:0005575,cellular_component; GO:0005576,extracellular region; GO:0110165,cellular anatomical entity	PF04674.15:Phosphate-induced protein 1 conserved region
110	MELO3C011232.2	0.7415	2.8639	0.6258	0.1874	0.5097	0.3632	2.8493	40.6909	32.6184	1.3679	3.403	1.8317	chr03	27615034	27619539	-	K24194 boron transporter | (RefSeq) probable boron transporter 6 (A)	--	probable boron transporter 6 isoform X2 [Cucumis melo]	BOR6_ARATH RecName: Full=Probable boron transporter 6;	A0A1S3BC02_CUCME SubName: Full=probable boron transporter 6 isoform X2 {ECO:0000313|RefSeq:XP_008445156.1};	Na+-independent Cl/HCO3 exchanger AE1 and related transporters (SLC4 family)	GO:0016021,integral component of membrane; GO:0005886,plasma membrane; GO:0015301,anion:anion antiporter activity; GO:0005452,inorganic anion exchanger activity; GO:0022857,transmembrane transporter activity; GO:0050801,ion homeostasis; GO:0055085,transmembrane transport; GO:0003674,molecular_function; GO:0005215,transporter activity; GO:0008509,anion transmembrane transporter activity; GO:001507…	PF00955.24:HCO3- transporter family
111	MELO3C011245.2	0.9202	1.1642	0.3568	1.2409	0.7362	0.6536	25.4664	19.6136	14.2096	2.6661	5.8445	2.8818	chr03	27505353	27507538	+	--	--	UPF0481 protein At3g47200-like [Cucumis melo]	Y3720_ARATH RecName: Full=UPF0481 protein At3g47200;	A0A1S3BCY5_CUCME SubName: Full=UPF0481 protein At3g47200-like {ECO:0000313|RefSeq:XP_008445187.1};	--	GO:0016021,integral component of membrane; GO:0005886,plasma membrane; GO:0005575,cellular_component; GO:0016020,membrane; GO:0031224,intrinsic component of membrane; GO:0110165,cellular anatomical entity; GO:0071944,cell periphery	PF03140.18:Plant protein of unknown function
112	MELO3C011295.2	0.9437	1.6874	0.9921	1.7879	2.165	2.2438	1.6138	3.3231	6.706	5.3614	2.1419	11.6256	chr03	27118894	27120900	-	K18834 WRKY transcription factor 1 | (RefSeq) WRKY transcription factor 1 (A)	ko04626: Plant-pathogen interaction	probable WRKY transcription factor 40 [Cucumis melo]	WRK40_ARATH RecName: Full=Probable WRKY transcription factor 40 {ECO:0000303|Ref.1}; AltName: Full=WRKY DNA-binding protein 40 {ECO:0000303|Ref.1};	A0A1S3BC94_CUCME SubName: Full=probable WRKY transcription factor 40 {ECO:0000313|RefSeq:XP_008445262.1};	--	GO:0005634,nucleus; GO:0003700,DNA-binding transcription factor activity; GO:0000976,transcription regulatory region sequence-specific DNA binding; GO:0042742,defense response to bacterium; GO:0050832,defense response to fungus; GO:0045892,negative regulation of transcription, DNA-templated; GO:0031347,regulation of defense response; GO:0002237,response to molecule of bacterial origin; GO:0009751…	PF03106.18:WRKY DNA -binding domain
113	MELO3C011353.2	28.2358	45.3118	33.5498	18.0336	37.3566	18.3301	45.3939	151.143	136.648	74.1585	91.3483	93.4014	chr03	26746674	26749241	-	--	--	DNA ligase 1-like isoform X2 [Cucumis melo var. makuwa]	--	A0A5A7VB55_CUCME SubName: Full=DNA ligase 1-like isoform X2 {ECO:0000313|EMBL:KAA0064838.1};	--	GO:0016874,ligase activity; GO:0003674,molecular_function; GO:0003824,catalytic activity	--
114	MELO3C011378.2	4.9917	4.0712	4.0399	9.3446	8.1904	9.3551	12.4682	11.7393	8.1134	29.3699	22.8158	32.1723	chr03	26494649	26503390	-	K01922 phosphopantothenate---cysteine ligase (ATP) [EC:6.3.2.51] | (RefSeq) phosphopantothenate--cysteine ligase 2-like (A)	ko00770: Pantothenate and CoA biosynthesis; ko01100: Metabolic pathways; ko01240: Biosynthesis of cofactors	phosphopantothenate--cysteine ligase 2 isoform X1 [Cucumis sativus]	PPCS2_ARATH RecName: Full=Phosphopantothenate--cysteine ligase 2; EC=6.3.2.5; AltName: Full=Phosphopantothenoylcysteine synthetase 2; Short=PPC synthetase 2;	A0A1S3BCJ3_CUCME SubName: Full=phosphopantothenate--cysteine ligase 2-like {ECO:0000313|RefSeq:XP_008445369.1, ECO:0000313|RefSeq:XP_008445370.1};	Uncharacterized conserved protein with similarity to phosphopantothenoylcysteine synthetase/decarboxylase	GO:0005737,cytoplasm; GO:0005634,nucleus; GO:0004632,phosphopantothenate--cysteine ligase activity; GO:0015937,coenzyme A biosynthetic process; GO:0003674,molecular_function; GO:0003824,catalytic activity; GO:0016874,ligase activity; GO:0016879,ligase activity, forming carbon-nitrogen bonds; GO:0016881,acid-amino acid ligase activity; GO:0006139,nucleobase-containing compound metabolic process; G…	PF04127.18:DNA / pantothenate metabolism flavoprotein
115	MELO3C011389.2	2.0575	7.0221	1.8131	9.6242	9.352	10.1328	4.4214	11.9465	26.9507	22.3781	12.6715	54.7096	chr03	26351292	26352575	-	K14493 gibberellin receptor GID1 [EC:3.-.-.-] | (RefSeq) gibberellin receptor GID1C (A)	ko04075: Plant hormone signal transduction	probable carboxylesterase 15 [Cucumis melo]	CXE15_ARATH RecName: Full=Probable carboxylesterase 15; AltName: Full=AtCXE15; EC=3.1.1.1;	A0A1S3BCL7_CUCME SubName: Full=probable carboxylesterase 15 {ECO:0000313|RefSeq:XP_008445398.1};	Arylacetamide deacetylase	GO:0080030,methyl indole-3-acetate esterase activity; GO:0003674,molecular_function; GO:0003824,catalytic activity; GO:0016787,hydrolase activity; GO:0016788,hydrolase activity, acting on ester bonds; GO:0052689,carboxylic ester hydrolase activity	PF07859.16:alpha/beta hydrolase fold
116	MELO3C011457.2	1.8369	1.3639	1.0579	1.0631	1.0943	0.8716	3.1846	3.4555	2.4985	1.4494	4.0201	1.6884	chr03	25878044	25883030	-	K16732 Ase1/PRC1/MAP65 family protein | (RefSeq) 65-kDa microtubule-associated protein 8 (A)	--	65-kDa microtubule-associated protein 8 isoform X1 [Cucumis melo]	MA658_ARATH RecName: Full=65-kDa microtubule-associated protein 8; Short=AtMAP65-8;	A0A1S3BCW3_CUCME SubName: Full=65-kDa microtubule-associated protein 8 isoform X1 {ECO:0000313|RefSeq:XP_008445502.1};	Microtubule-associated protein essential for anaphase spindle elongation	GO:0005737,cytoplasm; GO:0005874,microtubule; GO:0005634,nucleus; GO:0009524,phragmoplast; GO:0005819,spindle; GO:0000922,spindle pole; GO:0008017,microtubule binding; GO:0007049,cell cycle; GO:0051301,cell division; GO:0000226,microtubule cytoskeleton organization; GO:0003674,molecular_function; GO:0005488,binding; GO:0005515,protein binding; GO:0008092,cytoskeletal protein binding; GO:0015631,t…	PF03999.15:Microtubule associated protein (MAP65/ASE1 family)
117	MELO3C011556.2	18.031	36.296	21.0825	24.6526	25.8253	31.32	21.0424	88.3896	113.479	60.5379	59.6518	84.3127	chr03	15735293	15740025	+	--	--	Agenet domain-containing protein / bromo-adjacent domain-containing protein, putative isoform 1 [Cucumis melo var. makuwa]	DUF3_ARATH RecName: Full=DUF724 domain-containing protein 3 {ECO:0000305}; Short=AtDUF3 {ECO:0000303|PubMed:19795213};	A0A5D3CVM8_CUCME SubName: Full=Agenet domain-containing protein / bromo-adjacent domain-containing protein, putative isoform 1 {ECO:0000313|EMBL:TYK15977.1};	--	GO:0000325,plant-type vacuole; GO:0042803,protein homodimerization activity; GO:0040008,regulation of growth; GO:0003674,molecular_function; GO:0005488,binding; GO:0005515,protein binding; GO:0042802,identical protein binding; GO:0046983,protein dimerization activity; GO:0008150,biological_process; GO:0040007,growth; GO:0050789,regulation of biological process; GO:0065007,biological regulation; G…	PF05641.15:Agenet domain
118	MELO3C011771.2	0.7586	0.8675	0.8117	3.3632	2.0341	1.3479	17.3098	25.9556	22.4536	19.3889	24.0352	32.7522	chr10	4970395	4974352	-	K07407 alpha-galactosidase [EC:3.2.1.22] | (RefSeq) alpha-galactosidase (A)	ko00052: Galactose metabolism; ko00561: Glycerolipid metabolism; ko00600: Sphingolipid metabolism; ko00603: Glycosphingolipid biosynthesis - globo and isoglobo series; ko01100: Metabolic pathways	alpha-galactosidase isoform X1 [Cucumis melo]	AGAL2_ARATH RecName: Full=Alpha-galactosidase 2 {ECO:0000303|PubMed:15034167}; Short=AtAGAL2 {ECO:0000303|PubMed:15034167}; EC=3.2.1.22 {ECO:0000250|UniProtKB:Q9FXT4}; AltName: Full=Alpha-D-galactoside galactohydrolase 2 {ECO:0000305}; AltName: Full=Melibiase {ECO:0000305}; Flags: Precursor;	A0A1S3BEH7_CUCME RecName: Full=Alpha-galactosidase {ECO:0000256|ARBA:ARBA00012755, ECO:0000256|RuleBase:RU361168}; EC=3.2.1.22 {ECO:0000256|ARBA:ARBA00012755, ECO:0000256|RuleBase:RU361168}; AltName: Full=Melibiase {ECO:0000256|RuleBase:RU361168};	Alpha-D-galactosidase (melibiase)	GO:0048046,apoplast; GO:0009505,plant-type cell wall; GO:0099503,secretory vesicle; GO:0004557,alpha-galactosidase activity; GO:0052692,raffinose alpha-galactosidase activity; GO:0005975,carbohydrate metabolic process; GO:0071555,cell wall organization; GO:0009965,leaf morphogenesis; GO:0009911,positive regulation of flower development; GO:0009620,response to fungus; GO:0003674,molecular_function…	PF16499.8:Alpha galactosidase A
119	MELO3C011872.2	1.2037	1.1587	0.6545	1.6762	2.0646	0.9992	2.589	3.3585	2.0088	2.8165	5.383	10.0096	chr10	4221791	4225180	+	K00588 caffeoyl-CoA O-methyltransferase [EC:2.1.1.104] | (RefSeq) putative caffeoyl-CoA O-methyltransferase At1g67980 (A)	ko00940: Phenylpropanoid biosynthesis; ko00941: Flavonoid biosynthesis; ko00945: Stilbenoid, diarylheptanoid and gingerol biosynthesis; ko01100: Metabolic pathways; ko01110: Biosynthesis of secondary metabolites	putative caffeoyl-CoA O-methyltransferase At1g67980 [Cucumis melo]	CAMT1_ARATH RecName: Full=Putative caffeoyl-CoA O-methyltransferase At1g67980; EC=2.1.1.104; AltName: Full=Trans-caffeoyl-CoA 3-O-methyltransferase; Short=CCoAMT; Short=CCoAOMT;	A0A5A7SYK5_CUCME SubName: Full=Putative caffeoyl-CoA O-methyltransferase {ECO:0000313|EMBL:KAA0034199.1};	O-methyltransferase	GO:0005829,cytosol; GO:0042409,caffeoyl-CoA O-methyltransferase activity; GO:0046872,metal ion binding; GO:0008757,S-adenosylmethionine-dependent methyltransferase activity; GO:0009809,lignin biosynthetic process; GO:0032259,methylation; GO:0003674,molecular_function; GO:0003824,catalytic activity; GO:0008168,methyltransferase activity; GO:0008171,O-methyltransferase activity; GO:0016740,transfer…	PF01596.20:O-methyltransferase
120	MELO3C011883.2	7.1846	5.7693	6.5348	3.5369	3.9738	3.5302	13.103	21.944	24.2909	17.1665	21.7788	17.5635	chr10	4136231	4139853	-	K18342 OTU domain-containing protein 6 [EC:3.4.19.12] | (RefSeq) OTU domain-containing protein At3g57810-like (A)	--	OVARIAN TUMOR DOMAIN-containing deubiquitinating enzyme 4-like [Cucumis melo]	OTU4_ARATH RecName: Full=OVARIAN TUMOR DOMAIN-containing deubiquitinating enzyme 4 {ECO:0000303|PubMed:24659992}; Short=OTU domain-containing protein 4 {ECO:0000303|PubMed:24659992}; EC=3.4.19.12 {ECO:0000269|PubMed:24659992}; AltName: Full=Deubiquitinating enzyme OTU4 {ECO:0000303|PubMed:24659992};	A0A0A0KS16_CUCSA RecName: Full=OTU domain-containing protein {ECO:0000259|PROSITE:PS50802};	OTU (ovarian tumor)-like cysteine protease	GO:0009507,chloroplast; GO:0004843,thiol-dependent ubiquitin-specific protease activity; GO:0016579,protein deubiquitination; GO:0003674,molecular_function; GO:0003824,catalytic activity; GO:0008233,peptidase activity; GO:0008242,omega peptidase activity; GO:0016787,hydrolase activity; GO:0101005,ubiquitinyl hydrolase activity; GO:0140096,catalytic activity, acting on a protein; GO:0006464,cellul…	PF02338.22:OTU-like cysteine protease
121	MELO3C011978.2	1.9948	4.0381	1.8973	3.2834	2.7141	3.303	3.6055	21.3498	24.7549	12.3251	10.3686	14.0814	chr10	3500077	3504333	-	K13416 brassinosteroid insensitive 1-associated receptor kinase 1 [EC:2.7.10.1 2.7.11.1] | (RefSeq) BRASSINOSTEROID INSENSITIVE 1-associated receptor kinase 1-like (A)	ko04016: MAPK signaling pathway - plant; ko04075: Plant hormone signal transduction; ko04626: Plant-pathogen interaction	cysteine-rich receptor-like protein kinase 3 [Cucumis melo var. makuwa]	CRK3_ARATH RecName: Full=Cysteine-rich receptor-like protein kinase 3; Short=Cysteine-rich RLK3; EC=2.7.11.-; Flags: Precursor;	A0A5A7SUH5_CUCME SubName: Full=Cysteine-rich receptor-like protein kinase 3 {ECO:0000313|EMBL:KAA0034298.1};	--	GO:0016021,integral component of membrane; GO:0005739,mitochondrion; GO:0005886,plasma membrane; GO:0005524,ATP binding; GO:0106310,protein serine kinase activity; GO:0004674,protein serine/threonine kinase activity; GO:0006468,protein phosphorylation; GO:0000166,nucleotide binding; GO:0003674,molecular_function; GO:0005488,binding; GO:0017076,purine nucleotide binding; GO:0030554,adenyl nucleoti…	PF00069.28:Protein kinase domain
122	MELO3C012010.2	5.2723	6.1237	4.4163	12.5773	16.8136	18.8668	9.1308	17.1502	25.303	39.1764	20.2825	43.8447	chr10	3304173	3309866	-	K16055 trehalose 6-phosphate synthase/phosphatase [EC:2.4.1.15 3.1.3.12] | (RefSeq) probable alpha,alpha-trehalose-phosphate synthase [UDP-forming] 9 (A)	ko00500: Starch and sucrose metabolism; ko01100: Metabolic pathways; ko01110: Biosynthesis of secondary metabolites	putative alpha,alpha-trehalose-phosphate synthase [Cucumis melo var. makuwa]	TPS9_ARATH RecName: Full=Probable alpha,alpha-trehalose-phosphate synthase [UDP-forming] 9; EC=2.4.1.15; AltName: Full=Trehalose-6-phosphate synthase 9; Short=AtTPS9;	A0A5D3CUL2_CUCME SubName: Full=Putative alpha,alpha-trehalose-phosphate synthase {ECO:0000313|EMBL:TYK15591.1};	Trehalose-6-phosphate synthase component TPS1 and related subunits	GO:0016757,transferase activity, transferring glycosyl groups; GO:0005992,trehalose biosynthetic process; GO:0070413,trehalose metabolism in response to stress; GO:0003674,molecular_function; GO:0003824,catalytic activity; GO:0016740,transferase activity; GO:0005975,carbohydrate metabolic process; GO:0005984,disaccharide metabolic process; GO:0005991,trehalose metabolic process; GO:0008150,biolog…	PF00982.24:Glycosyltransferase family 20
123	MELO3C012040.2	1.7031	1.4215	1.0518	1.7193	1.4118	1.6551	4.8481	5.5662	2.7228	3.6953	5.2686	6.756	chr10	3056681	3087568	-	K02183 calmodulin | (RefSeq) probable calcium-binding protein CML30 (A)	ko04016: MAPK signaling pathway - plant; ko04070: Phosphatidylinositol signaling system; ko04626: Plant-pathogen interaction	uncharacterized protein E5676_scaffold35G00470 [Cucumis melo var. makuwa]	CML45_ARATH RecName: Full=Probable calcium-binding protein CML45 {ECO:0000305}; AltName: Full=Calmodulin-like protein 45 {ECO:0000303|Ref.4};	A0A5D3CVK3_CUCME RecName: Full=EF-hand domain-containing protein {ECO:0000259|PROSITE:PS50222};	Calmodulin and related proteins (EF-Hand superfamily)	GO:0005509,calcium ion binding; GO:0003674,molecular_function; GO:0005488,binding; GO:0043167,ion binding; GO:0043169,cation binding; GO:0046872,metal ion binding	--
124	MELO3C012122.2	0.0439	0.0241	0.0462	0.0329	0.1787	0.0588	0.1196	0.4363	0.2912	0.1503	0.8134	0.4473	chr10	2528606	2534784	+	K24195 xenotropic and polytropic retrovirus receptor 1 | (RefSeq) phosphate transporter PHO1 homolog 1 (A)	--	phosphate transporter PHO1 homolog 3-like [Cucumis melo]	PHO13_ARATH RecName: Full=Phosphate transporter PHO1 homolog 3; AltName: Full=Protein PHO1 homolog 3; Short=AtPHO1;H3;	A0A5D3D226_CUCME SubName: Full=Phosphate transporter PHO1-like protein 3-like {ECO:0000313|EMBL:TYK17690.1};	Predicted small molecule transporter	GO:0005737,cytoplasm; GO:0005794,Golgi apparatus; GO:0016021,integral component of membrane; GO:0005886,plasma membrane; GO:0005802,trans-Golgi network; GO:0000822,inositol hexakisphosphate binding; GO:0015114,phosphate ion transmembrane transporter activity; GO:0016036,cellular response to phosphate starvation; GO:0055062,phosphate ion homeostasis; GO:0006817,phosphate ion transport; GO:0055069,…	PF03124.17:EXS family
125	MELO3C012155.2	8.6699	14.0318	10.2105	3.1661	3.4767	6.5199	7.1501	53.7007	67.6345	10.734	13.4239	23.0578	chr10	2328268	2331702	+	--	--	ninja-family protein AFP3-like [Cucumis melo]	AFP2_ARATH RecName: Full=Ninja-family protein AFP2; AltName: Full=ABI five-binding protein 2; Short=ABI5-binding protein 2;	A0A5D3CCX0_CUCME RecName: Full=Ninja-family protein {ECO:0000256|RuleBase:RU369029}; AltName: Full=ABI-binding protein {ECO:0000256|RuleBase:RU369029};	--	GO:0005634,nucleus; GO:0045892,negative regulation of transcription, DNA-templated; GO:0009737,response to abscisic acid; GO:0009414,response to water deprivation; GO:0007165,signal transduction; GO:0006139,nucleobase-containing compound metabolic process; GO:0006351,transcription, DNA-templated; GO:0006355,regulation of transcription, DNA-templated; GO:0006725,cellular aromatic compound metaboli…	PF16136.8:Putative nuclear localisation signal
126	MELO3C012213.2	0.5609	0.4093	0.4324	0.4288	0.4679	0.5668	1.2788	1.1626	0.8402	1.0818	1.7781	1.3272	chr10	1946476	1949882	-	K16189 phytochrome-interacting factor 4 | (RefSeq) transcription factor PIF4-like (A)	ko04075: Plant hormone signal transduction	transcription factor bHLH30 [Cucumis melo]	BH030_ARATH RecName: Full=Transcription factor bHLH30; AltName: Full=Basic helix-loop-helix protein 30; Short=AtbHLH30; Short=bHLH 30; AltName: Full=Transcription factor EN 53; AltName: Full=bHLH transcription factor bHLH030;	A0A1S3BFZ7_CUCME SubName: Full=transcription factor bHLH30 {ECO:0000313|RefSeq:XP_008446553.2};	--	GO:0005634,nucleus; GO:0003677,DNA binding; GO:0003700,DNA-binding transcription factor activity; GO:0046983,protein dimerization activity; GO:0006355,regulation of transcription, DNA-templated; GO:0003674,molecular_function; GO:0003676,nucleic acid binding; GO:0005488,binding; GO:0097159,organic cyclic compound binding; GO:1901363,heterocyclic compound binding; GO:0140110,transcription regulator…	PF00010.29:Helix-loop-helix DNA-binding domain
127	MELO3C012457.2	3.9608	4.4576	4.2105	2.0634	1.5036	2.4878	13.1789	14.6785	14.4608	3.6519	4.6533	5.5053	chr10	353810	356838	+	K17098 annexin D | (RefSeq) annexin-like protein RJ4 (A)	--	annexin-like protein RJ4 [Cucumis melo]	ANX4_FRAAN RecName: Full=Annexin-like protein RJ4;	A0A1S3BFQ1_CUCME SubName: Full=annexin-like protein RJ4 {ECO:0000313|RefSeq:XP_008446931.1};	Annexin	GO:0005509,calcium ion binding; GO:0005544,calcium-dependent phospholipid binding; GO:0006950,response to stress; GO:0003674,molecular_function; GO:0005488,binding; GO:0043167,ion binding; GO:0043169,cation binding; GO:0046872,metal ion binding; GO:0005543,phospholipid binding; GO:0008289,lipid binding; GO:0008150,biological_process; GO:0050896,response to stimulus	PF00191.23:Annexin
128	MELO3C012526.2	2.7883	1.9055	2.3128	0.916	1.0891	0.7156	15.7094	15.0877	17.3551	7.5285	10.2683	6.5368	chr01	19470758	19474145	+	K17261 adenylyl cyclase-associated protein | (RefSeq) cyclase-associated protein 1 (A)	--	cyclase-associated protein 1 [Cucumis melo]	ACAP1_ARATH RecName: Full=Cyclase-associated protein 1; Short=AtCAP1; AltName: Full=Adenylyl cyclase-associated protein;	A0A1S3BHC0_CUCME SubName: Full=cyclase-associated protein 1 {ECO:0000313|RefSeq:XP_008447035.1};	Adenylate cyclase-associated protein (CAP/Srv2p)	GO:0005737,cytoplasm; GO:0003779,actin binding; GO:0008179,adenylate cyclase binding; GO:0030036,actin cytoskeleton organization; GO:0019933,cAMP-mediated signaling; GO:0045761,regulation of adenylate cyclase activity; GO:0009826,unidimensional cell growth; GO:0003674,molecular_function; GO:0005488,binding; GO:0005515,protein binding; GO:0008092,cytoskeletal protein binding; GO:0019899,enzyme bin…	PF08603.14:Adenylate cyclase associated (CAP) C terminal
129	MELO3C012644.2	0.051	0	0	0	0	0	11.3537	12.0324	10.5748	22.4478	19.4647	20.1994	chr01	21975815	21976345	+	--	--	--	--	--	--	--	--
130	MELO3C012701.2	14.9713	18.9022	8.7701	9.6724	29.9217	15.3607	47.1999	71.3318	74.0525	78.8878	166.587	72.4076	chr01	23072648	23073448	-	--	--	Phloem filament protein [Cucumis melo var. makuwa]	CYT4_ARATH RecName: Full=Cysteine proteinase inhibitor 4; Short=AtCYS-4; Flags: Precursor;	A0A5D3D2J2_CUCME SubName: Full=Phloem filament protein {ECO:0000313|EMBL:TYK17890.1};	--	GO:0005829,cytosol; GO:0005576,extracellular region; GO:0000325,plant-type vacuole; GO:0009506,plasmodesma; GO:0099503,secretory vesicle; GO:0005773,vacuole; GO:0004869,cysteine-type endopeptidase inhibitor activity; GO:0006952,defense response; GO:0003674,molecular_function; GO:0004857,enzyme inhibitor activity; GO:0004866,endopeptidase inhibitor activity; GO:0030234,enzyme regulator activity; G…	PF07430.14:Phloem filament protein PP1 cystatin-like domain
131	MELO3C012702.2	4.0365	5.0631	1.4586	4.1086	12.943	6.1481	18.3014	26.0513	36.2883	50.1619	99.9476	58.2478	chr01	23100122	23101045	-	--	--	uncharacterized protein LOC103489701 [Cucumis melo]	CYT4_ARATH RecName: Full=Cysteine proteinase inhibitor 4; Short=AtCYS-4; Flags: Precursor;	A0A1S3BHQ3_CUCME SubName: Full=uncharacterized protein LOC103489701 {ECO:0000313|RefSeq:XP_008447193.1};	--	GO:0005829,cytosol; GO:0005576,extracellular region; GO:0000325,plant-type vacuole; GO:0009506,plasmodesma; GO:0099503,secretory vesicle; GO:0005773,vacuole; GO:0004869,cysteine-type endopeptidase inhibitor activity; GO:0006952,defense response; GO:0003674,molecular_function; GO:0004857,enzyme inhibitor activity; GO:0004866,endopeptidase inhibitor activity; GO:0030234,enzyme regulator activity; G…	PF07430.14:Phloem filament protein PP1 cystatin-like domain
132	MELO3C012945.2	1.7431	2.9155	1.1955	8.3446	13.5008	7.4323	5.3036	9.9256	14.4705	19.9915	23.5202	25.6724	chr04	14955045	14963526	+	K05681 ATP-binding cassette, subfamily G (WHITE), member 2 | (RefSeq) ABC transporter G family member 9-like (A)	ko02010: ABC transporters	pleiotropic drug resistance protein 1-like [Cucumis melo]	PDR1_TOBAC RecName: Full=Pleiotropic drug resistance protein 1; AltName: Full=NtPDR1;	A0A1S3BGZ4_CUCME SubName: Full=pleiotropic drug resistance protein 1-like {ECO:0000313|RefSeq:XP_008447485.1};	Pleiotropic drug resistance proteins (PDR1-15), ABC superfamily	GO:0016021,integral component of membrane; GO:0140359,ABC-type transporter activity; GO:0005524,ATP binding; GO:0003674,molecular_function; GO:0003824,catalytic activity; GO:0005215,transporter activity; GO:0015399,primary active transmembrane transporter activity; GO:0016462,pyrophosphatase activity; GO:0016787,hydrolase activity; GO:0016817,hydrolase activity, acting on acid anhydrides; GO:0016…	PF01061.27:ABC-2 type transporter
133	MELO3C013411.2	0.3457	0.1656	0.2499	0.1939	0.3515	0.2004	7.2386	9.6969	6.598	7.1607	7.2626	5.4815	chr01	17482397	17489209	-	K00002 alcohol dehydrogenase (NADP+) [EC:1.1.1.2] | (RefSeq) aldo-keto reductase family 4 member C9-like (A)	ko00010: Glycolysis / Gluconeogenesis; ko00040: Pentose and glucuronate interconversions; ko00053: Ascorbate and aldarate metabolism; ko00561: Glycerolipid metabolism; ko00620: Pyruvate metabolism; ko01100: Metabolic pathways; ko01110: Biosynthesis of secondary metabolites; ko01240: Biosynthesis of cofactors	NADP-dependent D-sorbitol-6-phosphate dehydrogenase-like [Cucumis melo]	S6PD_MALDO RecName: Full=NADP-dependent D-sorbitol-6-phosphate dehydrogenase; EC=1.1.1.200; AltName: Full=Aldose-6-phosphate reductase [NADPH]; AltName: Full=NADP-S6PDH;	A0A1S3BIT8_CUCME SubName: Full=NADP-dependent D-sorbitol-6-phosphate dehydrogenase-like {ECO:0000313|RefSeq:XP_008448041.1};	Aldo/keto reductase family proteins	GO:0047641,aldose-6-phosphate reductase (NADPH) activity; GO:0003674,molecular_function; GO:0003824,catalytic activity; GO:0016491,oxidoreductase activity; GO:0016614,oxidoreductase activity, acting on CH-OH group of donors; GO:0016616,oxidoreductase activity, acting on the CH-OH group of donors, NAD or NADP as acceptor	PF00248.24:Aldo/keto reductase family
134	MELO3C013430.2	0.8455	1.1174	0.6178	13.8482	14.3214	13.4696	5.1211	3.8006	3.9563	33.1928	25.6071	31.2907	chr01	17776981	17778498	-	--	--	B-box zinc finger protein 20-like isoform X1 [Cucumis melo]	BBX20_ARATH RecName: Full=B-box zinc finger protein 20 {ECO:0000303|PubMed:19920209}; AltName: Full=Protein BZR1 SUPPRESSOR 1 {ECO:0000303|PubMed:22535582}; AltName: Full=Protein DOUBLE B-BOX 2; AltName: Full=Protein SALT TOLERANCE HOMOLOG 7;	A0A1S3BI96_CUCME SubName: Full=B-box zinc finger protein 20-like isoform X1 {ECO:0000313|RefSeq:XP_008448065.1};	--	GO:0005634,nucleus; GO:0003700,DNA-binding transcription factor activity; GO:0000976,transcription regulatory region sequence-specific DNA binding; GO:0008270,zinc ion binding; GO:1900458,negative regulation of brassinosteroid mediated signaling pathway; GO:0009640,photomorphogenesis; GO:2000306,positive regulation of photomorphogenesis; GO:0006355,regulation of transcription, DNA-templated; GO:0…	PF00643.27:B-box zinc finger
135	MELO3C013491.2	2.7568	2.2355	2.2004	4.0723	4.6635	5.6807	5.2379	6.7317	6.3532	11.3326	9.0486	11.0856	chr11	15866615	15868678	+	K13157 U11/U12 small nuclear ribonucleoprotein 65 kDa protein | (RefSeq) U11/U12 small nuclear ribonucleoprotein 65 kDa protein (A)	--	U11/U12 small nuclear ribonucleoprotein 65 kDa protein isoform X11 [Cucumis melo]	U1165_ARATH RecName: Full=U11/U12 small nuclear ribonucleoprotein 65 kDa protein; Short=U11/U12 snRNP 65 kDa protein; Short=U11/U12-65K;	A0A1S4DX29_CUCME SubName: Full=U11/U12 small nuclear ribonucleoprotein 65 kDa protein isoform X8 {ECO:0000313|RefSeq:XP_016900537.1};	Spliceosomal protein snRNP-U1A/U2B	GO:0005634,nucleus; GO:0005689,U12-type spliceosomal complex; GO:0097157,pre-mRNA intronic binding; GO:0030626,U12 snRNA binding; GO:0010229,inflorescence development; GO:0000398,mRNA splicing, via spliceosome; GO:0003674,molecular_function; GO:0003676,nucleic acid binding; GO:0003723,RNA binding; GO:0005488,binding; GO:0036002,pre-mRNA binding; GO:0097159,organic cyclic compound binding; GO:1901…	--
136	MELO3C013512.2	13.9963	14.7039	10.9166	10.3316	19.7455	12.6803	29.7587	41.0473	29.0555	32.7266	51.7342	34.5253	chr11	16437737	16443660	+	K00485 dimethylaniline monooxygenase (N-oxide forming) / hypotaurine monooxygenase [EC:1.14.13.8 1.8.1.-] | (RefSeq) probable flavin-containing monooxygenase 1 (A)	ko00430: Taurine and hypotaurine metabolism; ko01100: Metabolic pathways	probable flavin-containing monooxygenase 1 [Cucumis melo]	FMO1_ARATH RecName: Full=Probable flavin-containing monooxygenase 1; EC=1.14.13.-;	A0A1S3BK04_CUCME RecName: Full=Flavin-containing monooxygenase {ECO:0000256|RuleBase:RU361177}; EC=1.-.-.- {ECO:0000256|RuleBase:RU361177};	Flavin-containing monooxygenase	GO:0050660,flavin adenine dinucleotide binding; GO:0004499,N,N-dimethylaniline monooxygenase activity; GO:0050661,NADP binding; GO:0031543,peptidyl-proline dioxygenase activity; GO:0062047,pipecolic acid N-hydroxylase; GO:0071456,cellular response to hypoxia; GO:0042742,defense response to bacterium; GO:0050832,defense response to fungus; GO:0062034,L-pipecolic acid biosynthetic process; GO:00096…	PF00743.22:Flavin-binding monooxygenase-like
137	MELO3C013603.2	1.4261	2.9429	1.3675	2.0464	2.2065	3.3815	4.3139	5.8907	7.0947	11.6779	5.8108	18.4082	chr11	18836381	18838376	-	--	--	uncharacterized protein LOC103490514 [Cucumis melo]	--	A0A1S3BIR2_CUCME SubName: Full=uncharacterized protein LOC103490514 {ECO:0000313|RefSeq:XP_008448279.1, ECO:0000313|RefSeq:XP_008448280.1};	--	--	PF05623.15:Protein of unknown function (DUF789)
138	MELO3C013665.2	2.0893	3.5941	1.9349	2.0584	2.3187	3.5393	4.6978	10.5936	11.1201	5.338	8.5951	7.7508	chr11	20242351	20246725	+	K22048 mechanosensitive ion channel protein 4/5/6/7/8/9/10 | (RefSeq) mechanosensitive ion channel protein 6-like (A)	--	mechanosensitive ion channel protein 6-like [Cucumis melo var. makuwa]	MSL6_ARATH RecName: Full=Mechanosensitive ion channel protein 6; AltName: Full=Mechanosensitive channel of small conductance-like 6; AltName: Full=MscS-Like protein 6;	A0A5D3DK11_CUCME RecName: Full=Mechanosensitive ion channel protein {ECO:0000256|PIRNR:PIRNR017209};	Predicted mechanosensitive ion channel	GO:0016021,integral component of membrane; GO:0000325,plant-type vacuole; GO:0005886,plasma membrane; GO:0009506,plasmodesma; GO:0008381,mechanosensitive ion channel activity; GO:0006820,anion transport; GO:0003674,molecular_function; GO:0005215,transporter activity; GO:0005216,ion channel activity; GO:0015075,ion transmembrane transporter activity; GO:0015267,channel activity; GO:0015318,inorgan…	PF00924.21:Mechanosensitive ion channel
139	MELO3C013679.2	1.6661	11.0056	4.4186	0.623	4.6909	0.4659	4.9446	30.043	59.7545	28.2643	27.1323	24.5485	chr11	20433707	20434390	+	--	--	zinc finger protein ZAT11 [Cucumis melo]	ZAT11_ARATH RecName: Full=Zinc finger protein ZAT11;	A0A5A7V8C9_CUCME SubName: Full=Zinc finger protein ZAT11 {ECO:0000313|EMBL:KAA0061949.1};	FOG: Zn-finger	GO:0005634,nucleus; GO:0003700,DNA-binding transcription factor activity; GO:0046872,metal ion binding; GO:0000976,transcription regulatory region sequence-specific DNA binding; GO:0071289,cellular response to nickel ion; GO:2000280,regulation of root development; GO:0006355,regulation of transcription, DNA-templated; GO:0010200,response to chitin; GO:0003674,molecular_function; GO:0140110,transc…	PF13912.9:C2H2-type zinc finger
140	MELO3C013778.2	5.3602	4.1321	4.5165	7.4661	9.0241	7.8253	19.1536	22.0715	20.969	44.2303	42.2197	27.2311	chr06	33380252	33382736	-	--	--	uncharacterized protein LOC103490708 [Cucumis melo]	--	A0A5A7UAK6_CUCME SubName: Full=Uncharacterized protein {ECO:0000313|EMBL:KAA0052973.1};	--	GO:0016021,integral component of membrane; GO:0005575,cellular_component; GO:0016020,membrane; GO:0031224,intrinsic component of membrane; GO:0110165,cellular anatomical entity	--
141	MELO3C013945.2	2.0026	8.0174	1.8647	0.2282	0.5012	0.4897	2.7573	55.0201	92.039	1.2641	1.886	1.5829	chr06	35029392	35031425	+	K13993 HSP20 family protein | (RefSeq) small heat shock protein, chloroplastic-like (A)	ko04141: Protein processing in endoplasmic reticulum	small heat shock protein, chloroplastic-like isoform X2 [Cucumis melo]	HS23C_OXYRB RecName: Full=Small heat shock protein, chloroplastic; Flags: Precursor;	A0A1S3BKN7_CUCME SubName: Full=small heat shock protein, chloroplastic-like isoform X2 {ECO:0000313|RefSeq:XP_008448853.1};	Molecular chaperone (small heat-shock protein Hsp26/Hsp42)	GO:0009570,chloroplast stroma; GO:0005575,cellular_component; GO:0005622,intracellular anatomical structure; GO:0005737,cytoplasm; GO:0009507,chloroplast; GO:0009532,plastid stroma; GO:0009536,plastid; GO:0043226,organelle; GO:0043227,membrane-bounded organelle; GO:0043229,intracellular organelle; GO:0043231,intracellular membrane-bounded organelle; GO:0110165,cellular anatomical entity	PF00011.24:Hsp20/alpha crystallin family
142	MELO3C014247.2	0.0579	0.2379	0.2284	0.5633	0.9244	0.2945	1.9253	1.2698	0.7511	1.1887	4.4618	2.6767	chr05	4836682	4837575	+	--	--	uncharacterized protein LOC103491650 [Cucumis melo]	--	A0A1S3BMI8_CUCME SubName: Full=uncharacterized protein LOC103491650 {ECO:0000313|RefSeq:XP_008449921.1};	--	GO:0016021,integral component of membrane; GO:0005575,cellular_component; GO:0016020,membrane; GO:0031224,intrinsic component of membrane; GO:0110165,cellular anatomical entity	PF08241.15:Methyltransferase domain
143	MELO3C014376.2	0.796	0.4782	0.9491	0.2904	0.0729	1.5061	4.3915	3.7529	1.6108	1.5932	5.2878	5.351	chr05	3032488	3033821	+	--	--	elongation of fatty acids protein 3-like [Cucumis melo]	ELO3L_ARATH RecName: Full=Elongation of fatty acids protein 3-like; Short=Protein ELO3-like; EC=2.3.1.-; AltName: Full=Protein HIGH EXPRESSION OF OSMOTICALLY RESPONSIVE GENES 3; AltName: Full=Very long-chain fatty acid condensing enzyme HOS3; Short=VLCFA condensing enzyme HOS3;	A0A5D3CNK0_CUCME SubName: Full=Elongation of fatty acids protein 3-like {ECO:0000313|EMBL:TYK13401.1};	Fatty acyl-CoA elongase/Polyunsaturated fatty acid specific elongation enzyme	GO:0030176,integral component of endoplasmic reticulum membrane; GO:0009922,fatty acid elongase activity; GO:0071215,cellular response to abscisic acid stimulus; GO:0030497,fatty acid elongation; GO:0034625,fatty acid elongation, monounsaturated fatty acid; GO:0034626,fatty acid elongation, polyunsaturated fatty acid; GO:0019367,fatty acid elongation, saturated fatty acid; GO:0030148,sphingolipid…	PF01151.21:GNS1/SUR4 family
144	MELO3C014466.2	6.2979	22.9429	9.076	3.5557	11.7037	2.0862	18.9645	63.2289	92.5253	37.845	85.209	32.3291	chr05	2195056	2196477	-	K08235 xyloglucan:xyloglucosyl transferase [EC:2.4.1.207] | (RefSeq) xyloglucan endotransglucosylase/hydrolase 2-like (A)	--	xyloglucan endotransglucosylase/hydrolase 2-like [Cucumis melo var. makuwa]	XTH1_DIOKA RecName: Full=Xyloglucan endotransglucosylase protein 1 {ECO:0000305}; Short=XET protein 1 {ECO:0000305}; EC=2.4.1.207 {ECO:0000255|RuleBase:RU361120, ECO:0000269|PubMed:25849978}; AltName: Full=DkXTH1 {ECO:0000303|PubMed:23265513, ECO:0000303|PubMed:25849978, ECO:0000303|PubMed:28155115}; AltName: Full=Xyloglucan endotransglucosylase/hydrolase protein 1 {ECO:0000305}; Short=XTH protei…	A0A5A7V278_CUCME RecName: Full=Xyloglucan endotransglucosylase/hydrolase {ECO:0000256|RuleBase:RU361120}; EC=2.4.1.207 {ECO:0000256|RuleBase:RU361120};	--	GO:0048046,apoplast; GO:0004553,hydrolase activity, hydrolyzing O-glycosyl compounds; GO:0016762,xyloglucan:xyloglucosyl transferase activity; GO:0042546,cell wall biogenesis; GO:0071555,cell wall organization; GO:0009835,fruit ripening; GO:0010411,xyloglucan metabolic process; GO:0003674,molecular_function; GO:0003824,catalytic activity; GO:0016787,hydrolase activity; GO:0016798,hydrolase activi…	PF00722.24:Glycosyl hydrolases family 16
145	MELO3C014468.2	3.9419	17.2019	7.1617	0.9933	3.7396	0.5845	14.4368	88.5725	159.294	22.5831	42.8037	25.7641	chr05	2188305	2189692	-	K08235 xyloglucan:xyloglucosyl transferase [EC:2.4.1.207] | (RefSeq) XTH1; brassinosteroid-regulated protein BRU1-like (A)	--	brassinosteroid-regulated protein BRU1-like precursor [Cucumis melo]	XTH1_DIOKA RecName: Full=Xyloglucan endotransglucosylase protein 1 {ECO:0000305}; Short=XET protein 1 {ECO:0000305}; EC=2.4.1.207 {ECO:0000255|RuleBase:RU361120, ECO:0000269|PubMed:25849978}; AltName: Full=DkXTH1 {ECO:0000303|PubMed:23265513, ECO:0000303|PubMed:25849978, ECO:0000303|PubMed:28155115}; AltName: Full=Xyloglucan endotransglucosylase/hydrolase protein 1 {ECO:0000305}; Short=XTH protei…	Q06BI6_CUCME RecName: Full=Xyloglucan endotransglucosylase/hydrolase {ECO:0000256|RuleBase:RU361120}; EC=2.4.1.207 {ECO:0000256|RuleBase:RU361120};	--	GO:0048046,apoplast; GO:0004553,hydrolase activity, hydrolyzing O-glycosyl compounds; GO:0016762,xyloglucan:xyloglucosyl transferase activity; GO:0042546,cell wall biogenesis; GO:0071555,cell wall organization; GO:0009835,fruit ripening; GO:0010411,xyloglucan metabolic process; GO:0003674,molecular_function; GO:0003824,catalytic activity; GO:0016787,hydrolase activity; GO:0016798,hydrolase activi…	PF00722.24:Glycosyl hydrolases family 16
146	MELO3C014481.2	0.9166	1.428	0.8895	1.8279	13.5875	7.7954	5.6175	13.9459	20.0679	41.1323	26.3089	73.6087	chr05	2081413	2083740	-	K07025 putative hydrolase of the HAD superfamily | (RefSeq) uncharacterized LOC103491402 (A)	--	uncharacterized protein LOC103491402 [Cucumis melo]	--	A0A1S3BLM9_CUCME SubName: Full=uncharacterized protein LOC103491402 {ECO:0000313|RefSeq:XP_008449552.1};	Haloacid dehalogenase-like hydrolase	--	PF13242.9:HAD-hyrolase-like
147	MELO3C014485.2	0.1874	0.2872	0.1576	0.3551	0.1642	0.3075	0.0728	3.1733	7.0184	1.7548	1.3267	3.4043	chr05	2014604	2019987	-	K24193 MFS transporter, SP family, sugar:H+ symporter | (RefSeq) sugar transport protein 13 (A)	--	sugar transport protein 13 [Cucumis melo]	STP13_ARATH RecName: Full=Sugar transport protein 13; AltName: Full=Hexose transporter 13; AltName: Full=Multicopy suppressor of snf4 deficiency protein 1;	A0A5D3DC88_CUCME SubName: Full=Sugar transport protein 13 {ECO:0000313|EMBL:TYK21176.1};	Predicted transporter (major facilitator superfamily)	GO:0016021,integral component of membrane; GO:0005886,plasma membrane; GO:0009506,plasmodesma; GO:0009536,plastid; GO:0009679,hexose:proton symporter activity; GO:0005358,high-affinity glucose:proton symporter activity; GO:0015145,monosaccharide transmembrane transporter activity; GO:0015749,monosaccharide transmembrane transport; GO:0009737,response to abscisic acid; GO:0009651,response to salt …	PF00083.27:Sugar (and other) transporter
148	MELO3C014489.2	1.2172	0.9993	0.5081	10.5211	11.2215	19.9649	5.739	7.3019	9.0957	40.1382	43.8882	51.2095	chr05	1981078	1982524	-	K14499 BRI1 kinase inhibitor 1 | (RefSeq) BRI1 kinase inhibitor 1-like (A)	ko04075: Plant hormone signal transduction	probable membrane-associated kinase regulator 1 [Cucumis melo]	MAKR1_ARATH RecName: Full=Probable membrane-associated kinase regulator 1;	A0A1S3BMJ8_CUCME SubName: Full=probable membrane-associated kinase regulator 1 {ECO:0000313|RefSeq:XP_008449937.1};	--	GO:0005829,cytosol; GO:0005886,plasma membrane; GO:0009536,plastid; GO:0019210,kinase inhibitor activity; GO:0009742,brassinosteroid mediated signaling pathway; GO:0006629,lipid metabolic process; GO:0009741,response to brassinosteroid; GO:0003674,molecular_function; GO:0004857,enzyme inhibitor activity; GO:0019207,kinase regulator activity; GO:0030234,enzyme regulator activity; GO:0098772,molecu…	--
149	MELO3C014491.2	0.1803	0.111	0.1066	0.0674	0.2116	0.2774	2.0762	1.0133	0.3117	0.6759	1.4434	1.059	chr05	1967743	1968891	-	--	--	uncharacterized protein LOC103491410 [Cucumis melo]	--	A0A5D3DC08_CUCME SubName: Full=SEY1 {ECO:0000313|EMBL:TYK21181.1};	--	--	PF10500.12:Nuclear RNA-splicing-associated protein
150	MELO3C014505.2	0.1308	1.2888	0.1547	0.0489	0.1841	0.2449	0.3813	15.1047	25.0965	3.9737	5.1424	11.9832	chr05	1859294	1860254	-	--	--	NAC domain-containing protein 90 [Cucumis melo]	NAC90_ARATH RecName: Full=NAC domain-containing protein 90; Short=ANAC090;	A0A1S3BMD5_CUCME SubName: Full=NAC domain-containing protein 90 {ECO:0000313|RefSeq:XP_008449583.1};	--	GO:0005634,nucleus; GO:0003677,DNA binding; GO:0003700,DNA-binding transcription factor activity; GO:0003674,molecular_function; GO:0003676,nucleic acid binding; GO:0005488,binding; GO:0097159,organic cyclic compound binding; GO:1901363,heterocyclic compound binding; GO:0140110,transcription regulator activity; GO:0005575,cellular_component; GO:0005622,intracellular anatomical structure; GO:00432…	PF02365.18:No apical meristem (NAM) protein
151	MELO3C014579.2	0.4636	0.5124	0.5905	1.9736	1.4057	3.4198	0.8524	1.7735	1.1249	3.1938	6.0488	9.6195	chr05	1193674	1199556	+	K05681 ATP-binding cassette, subfamily G (WHITE), member 2 | (RefSeq) ABC transporter G family member 25 (A)	ko02010: ABC transporters	white-brown-complex ABC transporter family protein [Cucumis melo subsp. melo]	AB15G_ARATH RecName: Full=ABC transporter G family member 15; Short=ABC transporter ABCG.15; Short=AtABCG15; AltName: Full=White-brown complex homolog protein 15; Short=AtWBC15; AltName: Full=White-brown complex homolog protein 22; Short=AtWBC22;	E5GBS9_CUCME SubName: Full=White-brown-complex ABC transporter family protein {ECO:0000313|EMBL:ADN33921.1};	Transporter, ABC superfamily (Breast cancer resistance protein)	GO:0016021,integral component of membrane; GO:0140359,ABC-type transporter activity; GO:0005524,ATP binding; GO:0003674,molecular_function; GO:0003824,catalytic activity; GO:0005215,transporter activity; GO:0015399,primary active transmembrane transporter activity; GO:0016462,pyrophosphatase activity; GO:0016787,hydrolase activity; GO:0016817,hydrolase activity, acting on acid anhydrides; GO:0016…	PF01061.27:ABC-2 type transporter
152	MELO3C014620.2	0.0344	0.3106	0.0814	0.3601	0.3228	0.138	2.1856	1.4302	1.516	0.4885	3.2202	1.7236	chr05	892549	894054	-	K23260 scopoletin glucosyltransferase [EC:2.4.1.128] | (RefSeq) scopoletin glucosyltransferase-like (A)	ko00999: Biosynthesis of various plant secondary metabolites; ko01110: Biosynthesis of secondary metabolites	UDP-glycosyltransferase 92A1 [Cucumis melo]	U92A1_ARATH RecName: Full=UDP-glycosyltransferase 92A1; EC=2.4.1.-;	A0A5A7TH54_CUCME RecName: Full=Glycosyltransferase {ECO:0000256|RuleBase:RU362057}; EC=2.4.1.- {ECO:0000256|RuleBase:RU362057};	UDP-glucuronosyl and UDP-glucosyl transferase	GO:0008194,UDP-glycosyltransferase activity; GO:0003674,molecular_function; GO:0003824,catalytic activity; GO:0016740,transferase activity; GO:0016757,transferase activity, transferring glycosyl groups	PF00201.21:UDP-glucoronosyl and UDP-glucosyl transferase
153	MELO3C014631.2	0.0183	0.045	0	0.041	0.0171	0.0537	1.4375	0.5029	0.3157	4.6551	3.8123	6.1066	chr05	800572	804911	+	K00454 lipoxygenase [EC:1.13.11.12] | (RefSeq) lipoxygenase 2, chloroplastic-like (A)	ko00591: Linoleic acid metabolism; ko00592: alpha-Linolenic acid metabolism; ko01100: Metabolic pathways; ko01110: Biosynthesis of secondary metabolites	lipoxygenase 2, chloroplastic-like [Cucumis melo]	LOX2_ARATH RecName: Full=Lipoxygenase 2, chloroplastic; Short=AtLOX2; EC=1.13.11.12 {ECO:0000269|PubMed:18949503}; Flags: Precursor;	A0A5A7TD55_CUCME RecName: Full=Lipoxygenase {ECO:0000256|RuleBase:RU003975}; EC=1.13.11.- {ECO:0000256|RuleBase:RU003975};	--	GO:0009507,chloroplast; GO:0009941,chloroplast envelope; GO:0009570,chloroplast stroma; GO:0009535,chloroplast thylakoid membrane; GO:0005737,cytoplasm; GO:0005829,cytosol; GO:0016165,linoleate 13S-lipoxygenase activity; GO:0046872,metal ion binding; GO:0003729,mRNA binding; GO:0016702,oxidoreductase activity, acting on single donors with incorporation of molecular oxygen, incorporation of two at…	PF00305.22:Lipoxygenase
154	MELO3C014637.2	0.0098	0.0161	0	0.1027	0.0552	0.299	1.7494	0.518	0.4577	0.8357	1.1685	0.7832	chr05	740246	744956	+	K00454 lipoxygenase [EC:1.13.11.12] | (RefSeq) linoleate 13S-lipoxygenase 2-1, chloroplastic-like (A)	ko00591: Linoleic acid metabolism; ko00592: alpha-Linolenic acid metabolism; ko01100: Metabolic pathways; ko01110: Biosynthesis of secondary metabolites	lipoxygenase 2, chloroplastic-like [Cucumis melo]	LOX2_TANCI RecName: Full=Lipoxygenase 2, chloroplastic {ECO:0000303|PubMed:23893337}; Short=TcLOX2 {ECO:0000303|PubMed:23893337}; EC=1.13.11.- {ECO:0000255|PROSITE-ProRule:PRU00726}; Flags: Precursor;	A0A1S4DXN4_CUCME SubName: Full=linoleate 13S-lipoxygenase 2-1, chloroplastic-like {ECO:0000313|RefSeq:XP_016900737.1};	--	GO:0009507,chloroplast; GO:0046872,metal ion binding; GO:0016702,oxidoreductase activity, acting on single donors with incorporation of molecular oxygen, incorporation of two atoms of oxygen; GO:0006633,fatty acid biosynthetic process; GO:0031408,oxylipin biosynthetic process; GO:0003674,molecular_function; GO:0005488,binding; GO:0043167,ion binding; GO:0043169,cation binding; GO:0003824,catalyti…	PF00305.22:Lipoxygenase
155	MELO3C014638.2	0.8161	1.2219	0.8706	3.8953	3.8072	10.1189	1.5393	2.8594	1.9707	16.9514	8.7069	50.5006	chr05	731352	734467	+	K00454 lipoxygenase [EC:1.13.11.12] | (RefSeq) linoleate 13S-lipoxygenase 2-1, chloroplastic-like (A)	ko00591: Linoleic acid metabolism; ko00592: alpha-Linolenic acid metabolism; ko01100: Metabolic pathways; ko01110: Biosynthesis of secondary metabolites	linoleate 13S-lipoxygenase 2-1 [Cucumis melo var. makuwa]	LOX21_SOLTU RecName: Full=Linoleate 13S-lipoxygenase 2-1, chloroplastic {ECO:0000303|PubMed:8702864}; EC=1.13.11.12 {ECO:0000269|PubMed:11675388, ECO:0000269|PubMed:8702864}; AltName: Full=Lipoxygenase 2-1 {ECO:0000303|PubMed:8702864}; Flags: Precursor;	A0A5D3DDX5_CUCME RecName: Full=Lipoxygenase {ECO:0000256|RuleBase:RU003975}; EC=1.13.11.- {ECO:0000256|RuleBase:RU003975};	--	GO:0009570,chloroplast stroma; GO:0009534,chloroplast thylakoid; GO:0016165,linoleate 13S-lipoxygenase activity; GO:0046872,metal ion binding; GO:0016702,oxidoreductase activity, acting on single donors with incorporation of molecular oxygen, incorporation of two atoms of oxygen; GO:0006633,fatty acid biosynthetic process; GO:0010597,green leaf volatile biosynthetic process; GO:0034440,lipid oxid…	PF00305.22:Lipoxygenase
156	MELO3C014656.2	0.4053	0.2535	0	0.7794	1.5939	2.0546	2.3627	3.4703	2.5686	4.4467	18.2092	8.3414	chr05	606283	608027	-	K00430 peroxidase [EC:1.11.1.7] | (RefSeq) peroxidase 2-like (A)	ko00940: Phenylpropanoid biosynthesis; ko01100: Metabolic pathways; ko01110: Biosynthesis of secondary metabolites	peroxidase 2-like precursor [Cucumis melo var. makuwa]	PER2_CUCSA RecName: Full=Peroxidase 2; EC=1.11.1.7; AltName: Full=CUP2; Flags: Fragment;	A0A5A7TAE6_CUCME RecName: Full=Peroxidase {ECO:0000256|ARBA:ARBA00012313, ECO:0000256|RuleBase:RU362060}; EC=1.11.1.7 {ECO:0000256|ARBA:ARBA00012313, ECO:0000256|RuleBase:RU362060};	--	GO:0020037,heme binding; GO:0046872,metal ion binding; GO:0004601,peroxidase activity; GO:0042744,hydrogen peroxide catabolic process; GO:0006979,response to oxidative stress; GO:0003674,molecular_function; GO:0005488,binding; GO:0046906,tetrapyrrole binding; GO:0097159,organic cyclic compound binding; GO:1901363,heterocyclic compound binding; GO:0043167,ion binding; GO:0043169,cation binding; GO…	PF00141.26:Peroxidase
157	MELO3C014759.2	1.34	1.9803	1.4489	2.4623	2.6949	2.6012	3.1246	3.5066	4.0366	5.8303	9.3099	8.2736	chr06	24854570	24855922	-	--	--	uncharacterized protein LOC103491858 [Cucumis melo]	--	A0A5D3DYM4_CUCME SubName: Full=Uncharacterized protein {ECO:0000313|EMBL:TYK28350.1};	--	--	PF05553.14:Cotton fibre expressed protein
158	MELO3C014959.2	0	0	0	0	0	0	1.8251	2.932	2.9517	1.4972	2.8838	3.2684	chr06	19905641	19906186	-	--	--	--	--	--	--	--	--
159	MELO3C015024.2	1.1511	1.9176	0.7366	0.8484	0.6889	0.6337	2.8982	6.7213	9.2561	4.1202	2.1366	7.4455	chr02	9863654	9867744	-	K08332 vacuolar protein 8 | (RefSeq) U-box domain-containing protein 44-like (A)	--	U-box domain-containing protein 44-like [Cucumis melo var. makuwa]	PUB44_ARATH RecName: Full=U-box domain-containing protein 44; EC=2.3.2.27; AltName: Full=Plant U-box protein 44; AltName: Full=Protein SENESCENCE-ASSOCIATED E3 UBIQUITIN LIGASE 1; AltName: Full=RING-type E3 ubiquitin transferase PUB44 {ECO:0000305};	A0A5D3CYU0_CUCME SubName: Full=U-box domain-containing protein 44-like {ECO:0000313|EMBL:TYK15339.1};	FOG: Armadillo/beta-catenin-like repeats	GO:0005737,cytoplasm; GO:0005634,nucleus; GO:0005886,plasma membrane; GO:0070696,transmembrane receptor protein serine/threonine kinase binding; GO:0004842,ubiquitin-protein transferase activity; GO:0010150,leaf senescence; GO:0090359,negative regulation of abscisic acid biosynthetic process; GO:0010115,regulation of abscisic acid biosynthetic process; GO:0010380,regulation of chlorophyll biosynt…	PF00514.26:Armadillo/beta-catenin-like repeat
160	MELO3C015221.2	1.6687	2.0843	1.6868	5.0982	6.6658	3.3571	16.8946	7.5973	25.1197	121.448	25.0515	122.591	chr02	5692575	5701879	+	K01188 beta-glucosidase [EC:3.2.1.21] | (RefSeq) cyanogenic beta-glucosidase-like (A)	ko00460: Cyanoamino acid metabolism; ko00500: Starch and sucrose metabolism; ko00999: Biosynthesis of various plant secondary metabolites; ko01100: Metabolic pathways; ko01110: Biosynthesis of secondary metabolites	cyanogenic beta-glucosidase-like [Cucumis melo]	BGL12_ORYSI RecName: Full=Beta-glucosidase 12 {ECO:0000305}; EC=3.2.1.21 {ECO:0000305}; Flags: Precursor;	A0A1S3BPA3_CUCME SubName: Full=cyanogenic beta-glucosidase-like {ECO:0000313|RefSeq:XP_008450456.2};	Beta-glucosidase, lactase phlorizinhydrolase, and related proteins	GO:0005576,extracellular region; GO:0033907,beta-D-fucosidase activity; GO:0004565,beta-galactosidase activity; GO:0008422,beta-glucosidase activity; GO:0102483,scopolin beta-glucosidase activity; GO:0005975,carbohydrate metabolic process; GO:0003674,molecular_function; GO:0003824,catalytic activity; GO:0004553,hydrolase activity, hydrolyzing O-glycosyl compounds; GO:0016787,hydrolase activity; G…	PF00232.21:Glycosyl hydrolase family 1
161	MELO3C015306.2	4.6847	4.9538	3.2488	45.5979	57.7766	118.837	10.8379	10.4189	9.7503	326.555	193.417	366.293	chr02	674736	677296	+	--	--	dormancy-associated protein-like protein 3-like isoform X2 [Cucumis melo var. makuwa]	DRMH3_ARATH RecName: Full=Dormancy-associated protein homolog 3 {ECO:0000305}; AltName: Full=DRM1 homolog 3 {ECO:0000305};	A0A1S3BPL3_CUCME SubName: Full=dormancy-associated protein homolog 3-like isoform X2 {ECO:0000313|RefSeq:XP_008450631.1};	--	--	PF05564.15:Dormancy/auxin associated protein
162	MELO3C015334.2	4.7728	7.1723	4.8368	4.4408	4.9744	5.2968	5.4072	16.5045	20.2097	12.6819	9.7262	10.1828	chr02	813840	817505	-	K13754 solute carrier family 24 (sodium/potassium/calcium exchanger), member 6 | (RefSeq) cation/calcium exchanger 5 (A)	--	cation/calcium exchanger 5 isoform X1 [Cucumis melo]	CCX5_ARATH RecName: Full=Cation/calcium exchanger 5; AltName: Full=Protein CATION EXCHANGER 11;	A0A1S3BPP3_CUCME SubName: Full=cation/calcium exchanger 5 {ECO:0000313|RefSeq:XP_008450663.1};	K+-dependent Na+:Ca2+ antiporter	GO:0016021,integral component of membrane; GO:0016020,membrane; GO:0034399,nuclear periphery; GO:0005886,plasma membrane; GO:0015297,antiporter activity; GO:0008324,cation transmembrane transporter activity; GO:0015079,potassium ion transmembrane transporter activity; GO:0015081,sodium ion transmembrane transporter activity; GO:0006812,cation transport; GO:0071805,potassium ion transmembrane tran…	PF01699.27:Sodium/calcium exchanger protein
163	MELO3C015430.2	8.9627	12.3831	3.8931	1.0518	3.1736	9.5493	14.4794	38.6242	96.8008	17.3313	8.0652	20.1972	chr02	1610418	1613266	-	K00469 inositol oxygenase [EC:1.13.99.1] | (RefSeq) inositol oxygenase 2-like (A)	ko00053: Ascorbate and aldarate metabolism; ko00562: Inositol phosphate metabolism; ko01100: Metabolic pathways; ko01250: Biosynthesis of nucleotide sugars	inositol oxygenase 2-like [Cucumis melo]	MIOX2_ARATH RecName: Full=Inositol oxygenase 2 {ECO:0000303|PubMed:15660207}; EC=1.13.99.1 {ECO:0000250|UniProtKB:Q8H1S0, ECO:0000305|PubMed:15660207}; AltName: Full=Myo-inositol oxygenase 2; Short=AtMIOX2; Short=MI oxygenase 2;	A0A1S3BQR6_CUCME RecName: Full=Inositol oxygenase {ECO:0000256|ARBA:ARBA00011919, ECO:0000256|RuleBase:RU367039}; EC=1.13.99.1 {ECO:0000256|ARBA:ARBA00011919, ECO:0000256|RuleBase:RU367039}; AltName: Full=Myo-inositol oxygenase {ECO:0000256|RuleBase:RU367039};	Aldehyde reductase	GO:0005737,cytoplasm; GO:0050113,inositol oxygenase activity; GO:0005506,iron ion binding; GO:0019310,inositol catabolic process; GO:0019853,L-ascorbic acid biosynthetic process; GO:0003674,molecular_function; GO:0003824,catalytic activity; GO:0016491,oxidoreductase activity; GO:0016701,oxidoreductase activity, acting on single donors with incorporation of molecular oxygen; GO:0005488,binding; GO…	PF05153.18:Myo-inositol oxygenase
164	MELO3C015432.2	5.6523	6.0887	4.7083	7.4568	7.1163	9.8885	11.3827	13.8745	18.6748	18.4968	16.2885	18.4851	chr02	1621889	1625740	-	K14664 IAA-amino acid hydrolase [EC:3.5.1.-] | (RefSeq) IAA-amino acid hydrolase ILR1-like 4 (A)	--	IAA-amino acid hydrolase ILR1-like 4 [Cucumis melo]	ILL4_ARATH RecName: Full=IAA-amino acid hydrolase ILR1-like 4 {ECO:0000303|PubMed:10072397}; EC=3.5.1.- {ECO:0000305}; AltName: Full=jasmonoyl-L-amino acid hydrolase {ECO:0000305}; EC=3.5.1.127 {ECO:0000269|PubMed:24052260}; Flags: Precursor;	A0A5D3CIQ7_CUCME SubName: Full=IAA-amino acid hydrolase ILR1-like 4 {ECO:0000313|EMBL:TYK10129.1};	--	GO:0005783,endoplasmic reticulum; GO:0005788,endoplasmic reticulum lumen; GO:0005634,nucleus; GO:0016787,hydrolase activity; GO:0010179,IAA-Ala conjugate hydrolase activity; GO:0046872,metal ion binding; GO:0009850,auxin metabolic process; GO:0009611,response to wounding; GO:0003674,molecular_function; GO:0003824,catalytic activity; GO:0010178,IAA-amino acid conjugate hydrolase activity; GO:00168…	PF01546.31:Peptidase family M20/M25/M40
165	MELO3C015696.2	0.2148	0.0504	0.0484	0.459	0.1152	0.1806	11.485	12.5187	13.2073	9.4918	7.6115	7.3524	chr01	28565520	28567001	+	--	--	receptor-like protein 34 [Cucumis melo]	GSO2_ARATH RecName: Full=LRR receptor-like serine/threonine-protein kinase GSO2 {ECO:0000303|PubMed:18088309}; EC=2.7.11.1 {ECO:0000255|PROSITE-ProRule:PRU00159}; AltName: Full=Protein EMBRYO SAC DEVELOPMENT ARREST 23 {ECO:0000303|PubMed:15634699}; AltName: Full=Protein GASSHO 2 {ECO:0000303|PubMed:18088309}; Flags: Precursor;	A0A6A2Z012_HIBSY RecName: Full=Protein kinase domain-containing protein {ECO:0000259|PROSITE:PS50011};	--	GO:0048226,Casparian strip; GO:0016021,integral component of membrane; GO:0005886,plasma membrane; GO:0005524,ATP binding; GO:0106310,protein serine kinase activity; GO:0004674,protein serine/threonine kinase activity; GO:0071555,cell wall organization; GO:0009553,embryo sac development; GO:0006468,protein phosphorylation; GO:0051302,regulation of cell division; GO:0042659,regulation of cell fate…	PF13855.9:Leucine rich repeat
166	MELO3C015870.2	0.6569	1.1942	0.7029	0.4912	0.7926	0.8283	3.8294	3.902	3.2034	2.8877	3.556	1.6532	chr01	31289162	31291089	+	K20893 probable galacturonosyltransferase-like 1 [EC:2.4.1.-] | (RefSeq) probable galacturonosyltransferase-like 1 (A)	--	probable galacturonosyltransferase-like 4 [Cucumis melo]	GATL4_ARATH RecName: Full=Probable galacturonosyltransferase-like 4; EC=2.4.1.-; AltName: Full=Galactinol synthase 9; Short=AtGolS9; Short=GolS-9;	A0A5A7UVN9_CUCME RecName: Full=Hexosyltransferase {ECO:0000256|RuleBase:RU362027}; EC=2.4.1.- {ECO:0000256|RuleBase:RU362027};	--	GO:0005794,Golgi apparatus; GO:0000139,Golgi membrane; GO:0016021,integral component of membrane; GO:0090406,pollen tube; GO:0047262,polygalacturonate 4-alpha-galacturonosyltransferase activity; GO:0071555,cell wall organization; GO:0045489,pectin biosynthetic process; GO:0003674,molecular_function; GO:0003824,catalytic activity; GO:0008194,UDP-glycosyltransferase activity; GO:0016740,transferase…	PF01501.23:Glycosyl transferase family 8
167	MELO3C015908.2	1.6811	1.1931	1.4603	1.6407	2.9683	1.8368	3.1559	16.907	21.6201	12.4327	14.6425	14.9026	chr01	31667932	31672423	-	K13508 glycerol-3-phosphate acyltransferase [EC:2.3.1.15 2.3.1.198] | (RefSeq) probable glycerol-3-phosphate acyltransferase 3 (A)	ko00561: Glycerolipid metabolism; ko00564: Glycerophospholipid metabolism; ko01100: Metabolic pathways; ko01110: Biosynthesis of secondary metabolites	probable glycerol-3-phosphate acyltransferase 3 [Cucumis melo]	GPAT3_ARATH RecName: Full=Probable glycerol-3-phosphate acyltransferase 3; Short=AtGPAT3; EC=2.3.1.15;	A0A1S3BRK6_CUCME SubName: Full=probable glycerol-3-phosphate acyltransferase 3 {ECO:0000313|RefSeq:XP_008451448.1};	--	GO:0016021,integral component of membrane; GO:0016020,membrane; GO:0090447,glycerol-3-phosphate 2-O-acyltransferase activity; GO:0004366,glycerol-3-phosphate O-acyltransferase activity; GO:0016791,phosphatase activity; GO:0102420,sn-1-glycerol-3-phosphate C16:0-DCA-CoA acyl transferase activity; GO:0016024,CDP-diacylglycerol biosynthetic process; GO:0010143,cutin biosynthetic process; GO:0003674,…	PF01553.24:Acyltransferase
168	MELO3C016354.2	11.8847	9.55	9.4368	11.1658	13.5607	18.4035	24.3713	23.0582	17.17	46.9912	38.1811	61.5824	chr07	23849573	23855623	+	K11153 retinol dehydrogenase 12 [EC:1.1.1.300] | (RefSeq) short-chain dehydrogenase TIC 32, chloroplastic (A)	ko01100: Metabolic pathways; ko01240: Biosynthesis of cofactors	short-chain dehydrogenase TIC 32 [Cucumis melo var. makuwa]	TIC32_ARATH RecName: Full=Short-chain dehydrogenase TIC 32, chloroplastic {ECO:0000303|PubMed:15180984}; EC=1.1.1.-; AltName: Full=Translocon at the inner envelope membrane of chloroplasts 32 {ECO:0000303|PubMed:15180984}; Short=AtTIC32 {ECO:0000303|PubMed:15180984};	A0A5D3D084_CUCME SubName: Full=Short-chain dehydrogenase TIC 32 {ECO:0000313|EMBL:TYK16634.1};	Dehydrogenases with different specificities (related to short-chain alcohol dehydrogenases)	GO:0009507,chloroplast; GO:0009941,chloroplast envelope; GO:0009706,chloroplast inner membrane; GO:0005829,cytosol; GO:0005886,plasma membrane; GO:0016491,oxidoreductase activity; GO:0015031,protein transport; GO:0003674,molecular_function; GO:0003824,catalytic activity; GO:0006810,transport; GO:0006811,ion transport; GO:0006820,anion transport; GO:0008104,protein localization; GO:0008150,biologi…	PF00106.28:short chain dehydrogenase
169	MELO3C016402.2	0.1055	0.693	0	1.144	1.7822	2.3281	2.3063	1.6006	3.8749	4.5368	4.6392	24.8637	chr07	24182063	24183504	+	--	--	dehydrin Rab18 [Cucumis sativus]	--	A0A5D3CYN8_CUCME SubName: Full=Dehydrin DHN1 {ECO:0000313|EMBL:TYK16682.1};	--	GO:0046872,metal ion binding; GO:0009737,response to abscisic acid; GO:0009409,response to cold; GO:0009414,response to water deprivation; GO:0003674,molecular_function; GO:0005488,binding; GO:0043167,ion binding; GO:0043169,cation binding; GO:0008150,biological_process; GO:0009719,response to endogenous stimulus; GO:0009725,response to hormone; GO:0010033,response to organic substance; GO:003399…	PF00257.22:Dehydrin
[truncated: 278 more rows]

## Sheet: Table S5
Supplemental Table S5. Information of 17 fungus defence responses-related genes whose expression level in ‘K10-1’ was always higher than that in ‘K10-9’ in the control and treatment.
[truncated: 18 more rows]

[truncated: 12 more sheets: Table S6, Table S7, Table S8, Table S9, Table S10, Table S11, Table S12, Table S13, Table S14, Table S15, Table S16, Table S17]
